# Supplementary material
Source: PubMed Central journal article supplement (PMC4786373)
Supplement: NIHMS765414-supplement-Supp.pdf [file NIHMS765414-supplement-Supp.pdf]

## Supplementary Materials for

### **Sinus Microbiome Diversity Depletion and *Corynebacterium tuberculoostearicum* Enrichment Mediates Rhinosinusitis**

Nicole A. Abreu, Nabeetha A. Nagalingam, Yuanlin Song, Frederick C. Roediger, Steven D. Pletcher, Andrew N. Goldberg, Susan V. Lynch\*

\*To whom correspondence should be addressed. E-mail: susan.lynch@ucsf.edu

Published 12 September 2012, *Sci. Transl. Med.* **4**, 151ra124 (2012)  
DOI: 10.1126/scitranslmed.3003783

#### **The PDF file includes:**

Fig. S1. *Muc5A* mRNA expression (normalized to  $\beta$ -actin) is significantly increased in CRS patient samples compared to healthy subjects.

Fig. S2. Linear regression of qPCR-derived *C. tuberculoostearicum* abundance with array-reported florescence intensity and SNOT-20 score indicates strong concordance between qPCR and array-generated findings and confirms a strong positive relationship between *C. tuberculoostearicum* abundance and symptom severity.

Fig. S3. Murine experimental design.

Fig. S4. qPCR quantification of *C. tuberculoostearicum* and *L. sakei* load in murine sinus tissue.

Table S1. Bacterial taxa detected in study samples.

Table S2. Bacterial taxa detected in significantly altered abundance in CRS patient versus healthy subject sinuses.

Table S3. Bacterial taxa significantly correlated with sinus symptom severity.

Table S4. Significance values for comparative goblet cell number per micrometer of epithelial cell surface across mouse treatment groups.

Table S5. Significance values for comparative goblet cell number per micrometer of epithelial cell surface across mouse treatment groups that include animals instilled with *L. sakei*.

Table S6. Kolmogorov-Smirnov assessment of data distribution.

1 **Supplementary Material.**

2

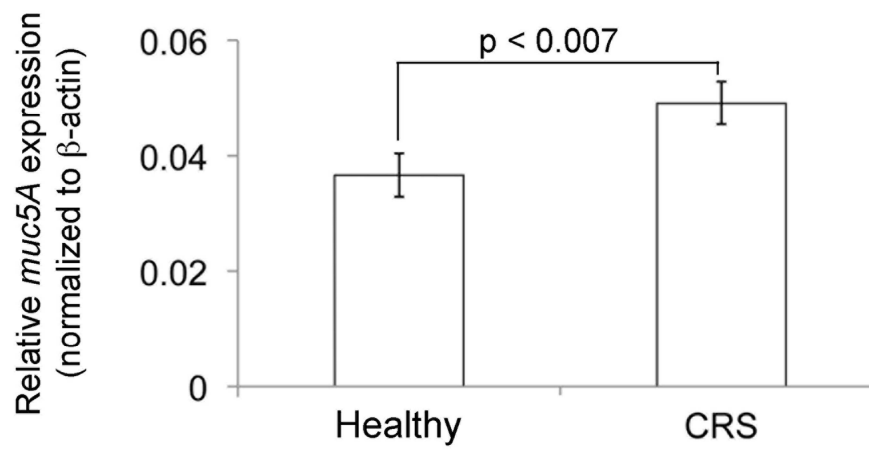

3

4 **Figure S1.** *Muc5A* mRNA expression (normalized to  $\beta$ -actin) is significantly increased in  
5 CRS patient samples compared to healthy subjects.

6

7

8

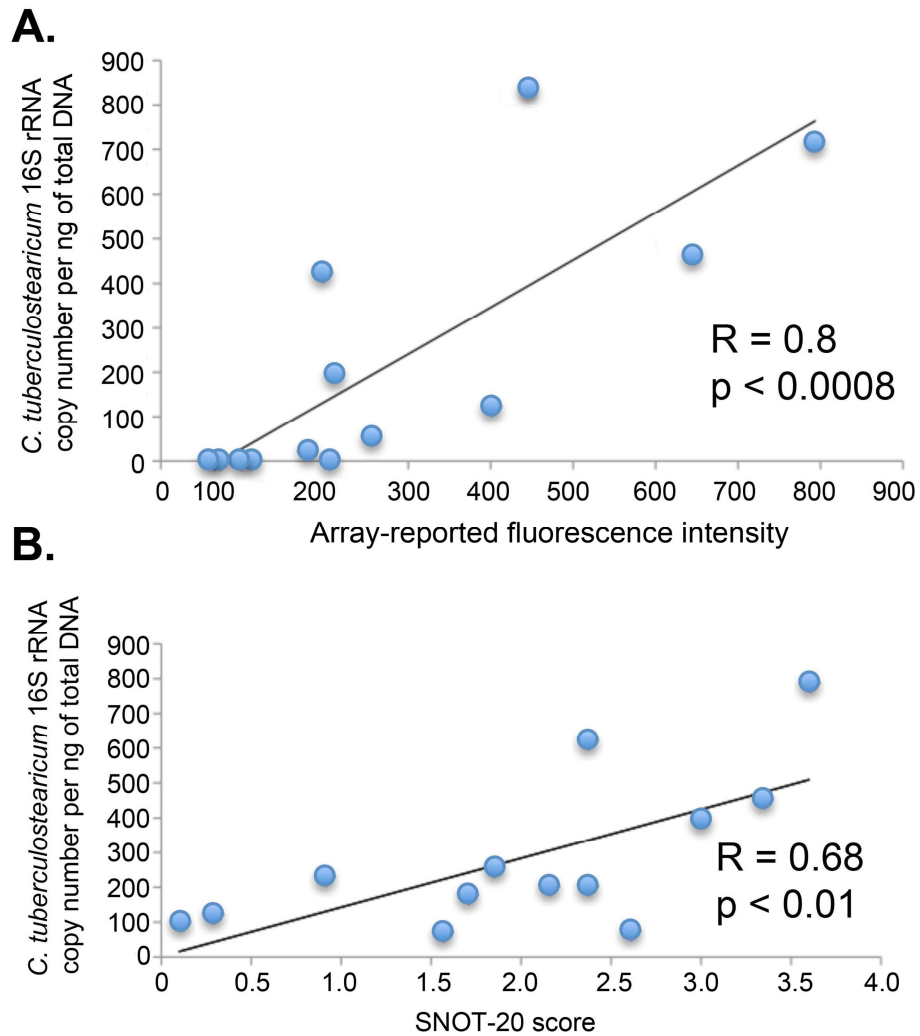

10

11 **Figure S2.** Linear regression of qPCR-derived *C. tuberculostearicum* abundance with  
 12 array-reported fluorescence intensity and SNOT-20 score indicates strong concordance  
 13 between qPCR and array-generated findings and confirms a strong positive relationship  
 14 between *C. tuberculostearicum* abundance and symptom severity.

15

16

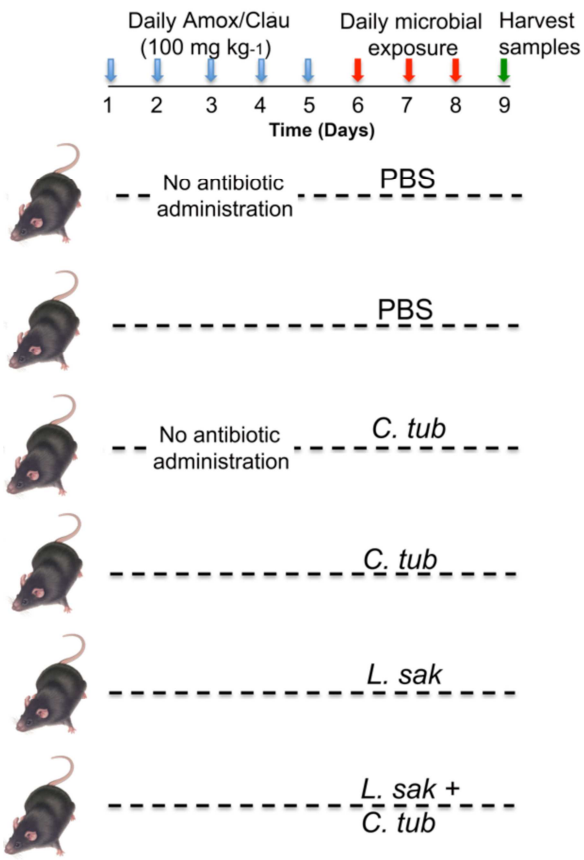

17

18

19 **Figure S3.** Murine experimental design. Amox, Amoxicillin; Clau, Clavulanate.

20

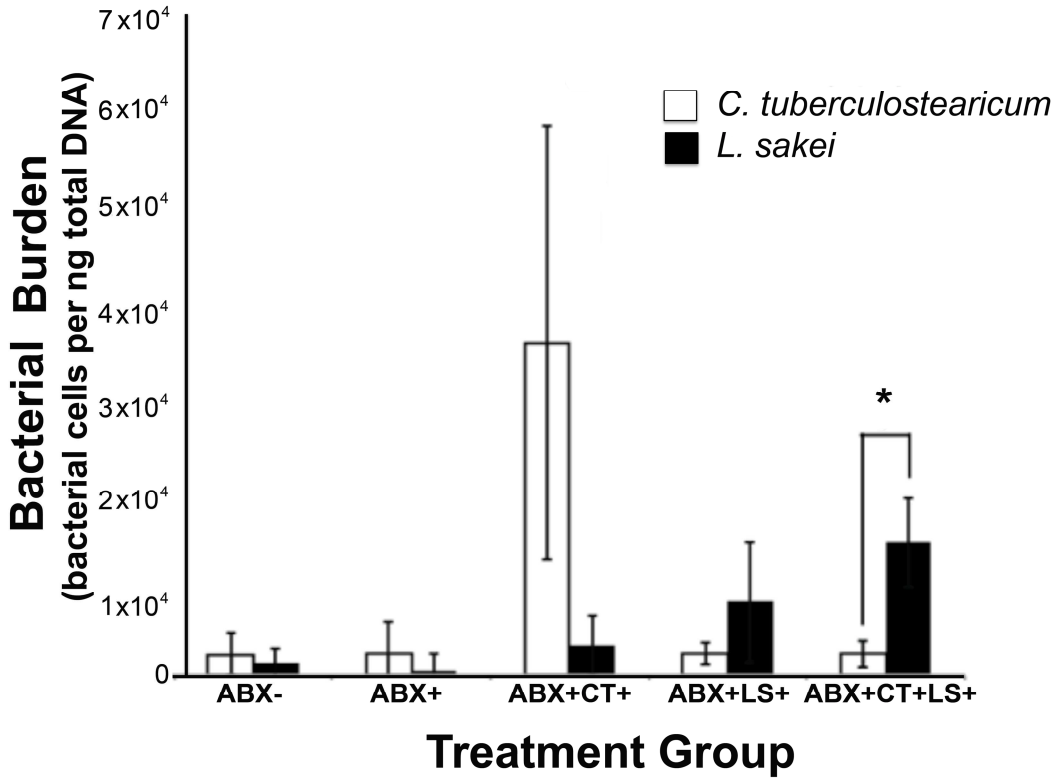

21

22 **Figure S4.** qPCR quantification of *C. tuberculostearium* and *L. sakei* load in murine  
 23 sinus tissue. Asterisk (\*) denotes statistical significance ( $p < 0.05$ ; students t-test). Total  
 24 16S rRNA copy number per species was normalized to known number of 16S rRNA  
 25 copies per genome for each species.

26

27

28

29

30

31

32

33

34

35

36

37

38

39

40 Because of their size, tables S1, S2 and S3 are appended as independent files.

41

42 **Table S1.** Bacterial taxa detected in study samples.

43

44 **Table S2.** Bacterial taxa detected in significantly altered abundance in CRS patient  
45 versus healthy subject sinuses.

46

47 **Table S3.** Bacterial taxa significantly correlated with sinus symptom severity.

48

49

---

**Table S4.** Significance values for comparative goblet cell number per micrometer of epithelial cell surface across mouse treatment groups (Fig. 3).

---

|         | AB- CT- | AB+ CT- | AB- CT+ | AB+ CT+ |
|---------|---------|---------|---------|---------|
| AB- CT- | -       | 0.36    | 0.011   | 0.0034  |
| AB+ CT- | -       | -       | 0.0012  | 0.0001  |
| AB- CT+ | -       | -       | -       | 0.0076  |
| AB+ CT+ | -       | -       | -       | -       |

---

50

51

52

---

**Table S5.** Significance values for comparative goblet cell number per micrometer of epithelial cell surface across mouse treatment groups that include animals instilled with *L. sakei* (Fig. 4).

---

|             | AB- CT- | AB+ CT- | AB+ LS+ | AB+ CT+ | AB+ CT+ LS+ |
|-------------|---------|---------|---------|---------|-------------|
| AB- CT-     | -       | 1       | 0.2002  | 0.0099  | 0.2082      |
| AB+ CT-     | -       | -       | 0.2002  | 0.0099  | 0.2082      |
| AB+ LS+     | -       | -       | -       | 0.0118  | 0.5717      |
| AB+ CT+     | -       | -       | -       | -       | 0.0141      |
| AB+ CT+ LS+ | -       | -       | -       | -       | -           |

---

53

54

55

**Table S1. Bacterial taxa detected in study samples**

| Phylum         | Family             | SF    | Taxon ID | Accession  | prokMSA Name                                                                                   |
|----------------|--------------------|-------|----------|------------|------------------------------------------------------------------------------------------------|
| Acidobacteria  | Unclassified       | sf_1  | 523      | AF245036.1 | soil metagenomic library clone 17F9                                                            |
| Acidobacteria  | Acidobacteriaceae  | sf_14 | 541      | AJ519667.1 | uranium mill tailings soil sample clone GuBH2-AG-47 sp.                                        |
| Acidobacteria  | Acidobacteriaceae  | sf_6  | 6362     | Y07646.1   | grassland soil clone DA052                                                                     |
| Acidobacteria  | Acidobacteriaceae  | sf_14 | 6421     | AJ292576.1 | PCB-polluted soil clone WD217                                                                  |
| Acidobacteria  | Acidobacteriaceae  | sf_14 | 6335     | AF523984.1 | forested wetland clone FW45                                                                    |
| Acidobacteria  | Acidobacteriaceae  | sf_6  | 6345     | AJ534634.1 | soil sample uranium mining waste pile near town Johanngeorgenstadt clone JG36-TzT-77 bacterium |
| Acidobacteria  | Acidobacteriaceae  | sf_14 | 6350     | AF498719.1 | soil isolate Ellin337                                                                          |
| Acidobacteria  | Acidobacteriaceae  | sf_6  | 6359     | AF529322.1 | PCE-contaminated site clone CLi114                                                             |
| Acidobacteria  | Acidobacteriaceae  | sf_16 | 6414     | AF529350.1 | PCE-contaminated site clone CLs73                                                              |
| Acidobacteria  | Acidobacteriaceae  | sf_6  | 6423     | AF523979.1 | coal effluent wetland clone FW92                                                               |
| Acidobacteria  | Acidobacteriaceae  | sf_14 | 6364     | AY234728.1 | Solibacter usitatus Ellin6076                                                                  |
| Acidobacteria  | Acidobacteriaceae  | sf_14 | 6424     | AF524859.1 | sphagnum peat bog clone K-5b10                                                                 |
| Acidobacteria  | Acidobacteriaceae  | sf_14 | 508      | AJ519382.1 | uranium mining waste pile clone JG37-AG-81 sp.                                                 |
| Acidobacteria  | Unclassified       | sf_1  | 572      | AF523986.1 | forested wetland clone FW144                                                                   |
| Acidobacteria  | Unclassified       | sf_1  | 6426     | AF407714.1 | Great Artesian Basin clone B11                                                                 |
| Acidobacteria  | Acidobacteriaceae  | sf_14 | 6425     | AF407719.1 | Great Artesian Basin clone B27                                                                 |
| Acidobacteria  | Acidobacteriaceae  | sf_14 | 6410     |            |                                                                                                |
| Acidobacteria  | Unclassified       | sf_1  | 87       | AF097766.1 | activated sludge clone 2951                                                                    |
| Acidobacteria  | Unclassified       | sf_1  | 6367     | AF529104.1 | TCE-contaminated site clone FTL227                                                             |
| Acidobacteria  | Unclassified       | sf_1  | 1049     | AF013534.2 | soil clone C112                                                                                |
| Acidobacteria  | Unclassified       | sf_1  | 790      | Z95709.1   | soil clone 11-25                                                                               |
| Acidobacteria  | Unclassified       | sf_1  | 6357     | AY118153.1 | anaerobic benzene-degrading clone Cart-N4                                                      |
| Acidobacteria  | Unclassified       | sf_1  | 435      | AY211077.1 | anaerobic VC-degrading enrichment clone VC47 bacterium                                         |
| Acidobacteria  | Acidobacteriaceae  | sf_14 | 6378     | D26171.1   | Acidobacterium capsulatum                                                                      |
| Acidobacteria  | Acidobacteriaceae  | sf_14 | 6412     | AF047646.1 | acid mine drainage clone TRB82                                                                 |
| Acidobacteria  | Unclassified       | sf_1  | 588      | AJ009461.1 | TCB-transforming consortium clone SJA-36                                                       |
| Acidobacteria  | Unclassified       | sf_1  | 4222     | AF523991.1 | forested wetland clone FW105                                                                   |
| Acidobacteria  | Unclassified       | sf_1  | 897      | AY221071.1 | Mammoth cave clone CCM8b                                                                       |
| Acidobacteria  | Unclassified       | sf_1  | 516      | AJ532721.1 | uranium mining waste pile clone JG34-KF-153                                                    |
| Acidobacteria  | Acidobacteriaceae  | sf_14 | 964      | AJ519392.1 | uranium mining waste pile clone JG37-AG-145 sp.                                                |
| Acidobacteria  | Acidobacteriaceae  | sf_14 | 6368     | AF200698.1 | soil clone UA2                                                                                 |
| Acidobacteria  | Acidobacteriaceae  | sf_14 | 6366     | AJ292578.1 | PCB-polluted soil clone WD228                                                                  |
| Acidobacteria  | Acidobacteriaceae  | sf_14 | 208      | AJ519665.1 | uranium mill tailings soil sample clone GuBH2-AD-9 sp.                                         |
| Acidobacteria  | Acidobacteriaceae  | sf_14 | 105      | AJ535239.1 | marine sediment above hydrate ridge clone Hyd24-44 sp.                                         |
| Acidobacteria  | Unclassified       | sf_1  | 100      | AJ534631.1 | soil sample uranium mining waste pile near town Johanngeorgenstadt clone JG36-TzT-10           |
| Acidobacteria  | Unclassified       | sf_1  | 37       | AY214904.2 | soil clone BAC-14A1                                                                            |
| Acidobacteria  | Unclassified       | sf_1  | 500      | Z95717.1   | soil clone RB24                                                                                |
| Actinobacteria | Unclassified       | sf_3  | 1687     | AJ626896.1 | Jonesia quinghaiensis str. DSM 15701                                                           |
| Actinobacteria | Unclassified       | sf_3  | 1243     | AB089076.1 | termite gut homogenate clone Rs-M95 bacterium                                                  |
| Actinobacteria | Unclassified       | sf_3  | 1405     | X80744.1   | Arthrobacter ureafaciens str. DSM 20126                                                        |
| Actinobacteria | Micrococcaceae     | sf_1  | 2019     | AF057289.1 | Micrococcus luteus str. HN2-11                                                                 |
| Actinobacteria | Microbacteriaceae  | sf_1  | 1437     | AJ575522.1 | freshwater clone SV1-16                                                                        |
| Actinobacteria | Corynebacteriaceae | sf_1  | 1517     | X84446.1   | Corynebacterium xerosis str. DSM 20743                                                         |

|                |                       |      |      |            |                                                                                         |
|----------------|-----------------------|------|------|------------|-----------------------------------------------------------------------------------------|
| Actinobacteria | Corynebacteriaceae    | sf_1 | 1492 | AY677186.1 | Corynebacterium tuscaniae str. ISS-5309                                                 |
| Actinobacteria | Corynebacteriaceae    | sf_1 | 1820 | U87823.1   | Corynebacterium jeikeium str. ATCC 43734                                                |
| Actinobacteria | Corynebacteriaceae    | sf_1 | 1374 |            |                                                                                         |
| Actinobacteria | Corynebacteriaceae    | sf_1 | 1428 | AF537604.1 | Corynebacterium simulans National Microbiology Laboratory Special identifier 00-0186    |
| Actinobacteria | Bifidobacteriaceae    | sf_1 | 1444 | AY278612.1 | Bifidobacteriaceae genomosp. C1                                                         |
| Actinobacteria | Acidimicrobiaceae     | sf_1 | 1749 | AY913475.1 | forest soil clone DUNssu275 (-3A) (OTU#188)                                             |
| Actinobacteria | Acidimicrobiaceae     | sf_1 | 1856 | AF523913.1 | forested wetland clone RCP2-105                                                         |
| Actinobacteria | Rubrobacteraceae      | sf_1 | 1551 | AF498683.1 | soil isolate Ellin301                                                                   |
| Actinobacteria | Actinomycetaceae      | sf_1 | 1684 | AJ428402.1 | Varibaculum cambriense str. CCUG 44998                                                  |
| Actinobacteria | Bifidobacteriaceae    | sf_1 | 1351 | AY174108.1 | Bifidobacterium psychraerophilum str. T16                                               |
| Actinobacteria | Bifidobacteriaceae    | sf_1 | 1967 | D86187.1   | Bifidobacterium pseudocatenulatum str. JCM1200                                          |
| Actinobacteria | Bifidobacteriaceae    | sf_1 | 2040 | AF275881.1 | Bifidobacterium adolescentis str. E-981074T                                             |
| Actinobacteria | Bifidobacteriaceae    | sf_1 | 1109 | AY148470.1 | Bifidobacterium thermacidophilum porcinum subsp. suis str. P3-14 subsp.                 |
| Actinobacteria | Bifidobacteriaceae    | sf_1 | 1835 | AY513712.1 | Bifidobacterium breve str. KB 92                                                        |
| Actinobacteria | Bifidobacteriaceae    | sf_1 | 1875 |            |                                                                                         |
| Actinobacteria | Corynebacteriaceae    | sf_1 | 1803 | AJ429234.1 | Corynebacterium spheniscorum str. CCUG 45512                                            |
| Actinobacteria | Unclassified          | sf_1 | 1898 | AB089074.1 | termite gut homogenate clone Rs-J10 bacterium                                           |
| Actinobacteria | Cellulomonadaceae     | sf_1 | 1748 | Y18378.1   | Beutenbergia cavernosa str. DSM 12333                                                   |
| Actinobacteria | Micrococcaceae        | sf_1 | 1266 | AF134179.1 | Arthrobacter psychrolactophilus                                                         |
| Actinobacteria | Unclassified          | sf_3 | 1577 | AB089072.1 | termite gut homogenate clone Rs-N91 bacterium                                           |
| Actinobacteria | Micrococcaceae        | sf_1 | 1213 | X87756.1   | Kocuria roseus                                                                          |
| Actinobacteria | Kineosporiaceae       | sf_1 | 1961 | X77958.1   | Kineococcus aurantiacus str. IFO 15268                                                  |
| Actinobacteria | Acidimicrobiaceae     | sf_1 | 1360 | AF523917.1 | forested wetland clone RCP2-103                                                         |
| Actinobacteria | Mycobacteriaceae      | sf_1 | 1262 | AJ310467.1 | Mycobacterium holsaticum str. 1406                                                      |
| Actinobacteria | Mycobacteriaceae      | sf_1 | 1650 | X58890.1   | Mycobacterium tuberculosis str. NCTC 7416 H37Rv                                         |
| Actinobacteria | Cellulomonadaceae     | sf_1 | 1586 | X83800.1   | Cellulomonas gelida str. DSM 20111T                                                     |
| Actinobacteria | Promicromonosporaceae | sf_1 | 1671 | X79453.1   | Cellulosimicrobium cellulans str. NCIMB 11025                                           |
| Actinobacteria | Rubrobacteraceae      | sf_1 | 1843 | AJ536866.1 | uranium mining waste pile soil sample clone JG30-KF-A23                                 |
| Actinobacteria | Micrococcaceae        | sf_1 | 1557 | X83408.1   | Arthrobacter oxydans str. DSM 20119                                                     |
| Actinobacteria | Micrococcaceae        | sf_1 | 1593 | M23411.1   | Arthrobacter globiformis                                                                |
| Actinobacteria | Micrococcaceae        | sf_1 | 1610 | X86595.1   | Arthrobacter sp str. AC-51                                                              |
| Actinobacteria | Micrococcaceae        | sf_1 | 1966 | AY133106.1 | TCE-contaminated site clone ccspost2208                                                 |
| Actinobacteria | Micrococcaceae        | sf_1 | 1324 | AF479325.1 | glacial ice isolate str. CanDirty1                                                      |
| Actinobacteria | Micrococcaceae        | sf_1 | 1494 | X80748.1   | Arthrobacter agilis str. DSM 20550                                                      |
| Actinobacteria | Micrococcaceae        | sf_1 | 1573 | AJ315492.1 | Arthrobacter nicotianae str. SB42                                                       |
| Actinobacteria | Unclassified          | sf_1 | 1676 |            |                                                                                         |
| Actinobacteria | Mycobacteriaceae      | sf_1 | 1187 | AF498656.1 | Mycobacterium aichiense str. JS618                                                      |
| Actinobacteria | Mycobacteriaceae      | sf_1 | 1308 | AJ431371.1 | Mycobacterium pyrenivorans str. DSM 44605                                               |
| Actinobacteria | Mycobacteriaceae      | sf_1 | 1726 | X52925.1   | Mycobacterium terrae str. ATCC 15755                                                    |
| Actinobacteria | Corynebacteriaceae    | sf_1 | 1089 | AF537600.1 | Corynebacterium mucifaciens National Microbiology Laboratory Special identifier 01-0118 |
| Actinobacteria | Unclassified          | sf_2 | 1652 | AY193208.1 | marine sediment clone Bo17                                                              |
| Actinobacteria | Nocardiopsaceae       | sf_1 | 1385 | AF178988.1 | Streptomonospora salina str. YIM90002                                                   |
| Actinobacteria | Acidimicrobiaceae     | sf_1 | 1090 |            |                                                                                         |
| Actinobacteria | Unclassified          | sf_1 | 1217 | AJ306762.2 | DCP-dechlorinating consortium clone SHA-34                                              |
| Actinobacteria | Micrococcaceae        | sf_1 | 1686 | AY228479.1 | Yania halotolerans str. YIM 70085                                                       |
| Actinobacteria | Unclassified          | sf_3 | 2045 | AF507852.1 | hypersaline lake clone ML602J-44                                                        |
| Actinobacteria | Micrococcaceae        | sf_1 | 1724 | X95483.1   | Rothia mucilaginoso str. DSM                                                            |
| Actinobacteria | Propionibacteriaceae  | sf_1 | 2002 | AB108484.1 | Propionibacterium acnes #2929                                                           |



|                |                       |      |      |            |                                                                          |
|----------------|-----------------------|------|------|------------|--------------------------------------------------------------------------|
| Actinobacteria | Mycobacteriaceae      | sf_1 | 2034 | X79094.1   | Mycobacterium chlorophenicum str. PCP-I                                  |
| Actinobacteria | Mycobacteriaceae      | sf_1 | 1175 | AJ243481.1 | Mycobacterium cf. xenopi 'Hymi_Wue Tb_939/99'<br>str. Hymi_Wue Tb_939/99 |
| Actinobacteria | Streptomycetaceae     | sf_1 | 1354 | X80825.1   | Streptomyces subrutillus str. DSM 40445                                  |
| Actinobacteria | Thermomonosporaceae   | sf_1 | 1546 | AJ420137.1 | Actinomadura fulvescens str. DSM 43923T                                  |
| Actinobacteria | Actinomycetaceae      | sf_1 | 1227 | AB062278.1 | Actinomyces naeslundii                                                   |
| Actinobacteria | Pseudonocardiaceae    | sf_1 | 1863 |            |                                                                          |
| Actinobacteria | Unclassified          | sf_4 | 1337 | AF234118.1 | Sturt arid-zone soil clone #0425-2M17                                    |
| Actinobacteria | Micromonosporaceae    | sf_1 | 1641 | AB196714.1 | Micromonospora marina str. JSM3-1                                        |
| Actinobacteria | Frankiaceae           | sf_1 | 1286 | AJ408875.1 | Frankia sp. Sn5-8                                                        |
| Actinobacteria | Sporichthyaceae       | sf_1 | 1695 | AY250883.1 | lichen-dominated Antarctic cryptoendolithic<br>community clone FBP417    |
| Actinobacteria | Unclassified          | sf_1 | 1370 | AF523912.1 | forested wetland clone RCP1-37                                           |
| Actinobacteria | Promicromonosporaceae | sf_1 | 1711 | AJ272024.1 | Promicromonospora sukumoe str. DSM 44121                                 |
| Actinobacteria | Micrococcaceae        | sf_1 | 1889 | AB094464.1 | Citricoccus sp. str. 2216.25.22                                          |
| Actinobacteria | Dermabacteraceae      | sf_1 | 2053 | X91033.1   | Brachybacterium nesterenkovi str. DSM 9573                               |
| Actinobacteria | Dietziaceae           | sf_1 | 1970 | AF481211.1 | Dietzia sp. str. E9_2                                                    |
| Actinobacteria | Cellulomonadaceae     | sf_1 | 1450 |            |                                                                          |
| Actinobacteria | Unclassified          | sf_3 | 1296 | AB089080.1 | termite gut homogenate clone Rs-M66 bacterium                            |
| Actinobacteria | Micromonosporaceae    | sf_1 | 1910 | AB013495.2 | Actinoplanes capillaceus str. K95-5561                                   |
| Actinobacteria | Nocardiaceae          | sf_1 | 1142 |            |                                                                          |
| Actinobacteria | Propionibacteriaceae  | sf_1 | 2023 | AJ315953.1 | Propionibacterium propionicum str. DSM 43307T                            |
| Actinobacteria | Micromonosporaceae    | sf_1 | 1633 | AJ277585.1 | Actinoplanes tuftoflagellus str. IMSNU 22135                             |
| Actinobacteria | Mycobacteriaceae      | sf_1 | 1239 | AJ271863.1 | Mycobacterium ratisbonense str. SD4                                      |
| Actinobacteria | Mycobacteriaceae      | sf_1 | 1681 | AY227356.1 | Mycobacterium sp. str. 1B(CD)                                            |
| Actinobacteria | Mycobacteriaceae      | sf_1 | 1404 | AJ507468.1 | freshwater isolate str. MWH-Ta3                                          |
| Actinobacteria | Nocardioidaceae       | sf_1 | 1854 | AY166703.1 | Aeromicrobium marinum str. T2                                            |
| Actinobacteria | Micromonosporaceae    | sf_1 | 1615 | AB036999.1 | Actinoplanes derwentensis str. IFO 14935T                                |
| Actinobacteria | Dietziaceae           | sf_1 | 1872 | X79290.1   | Dietzia maris                                                            |
| Actinobacteria | Acidimicrobiaceae     | sf_1 | 2014 | AY093455.1 | marine sediment clone MB-A2-100                                          |
| Actinobacteria | Pseudonocardiaceae    | sf_1 | 1343 | Z38017.1   | Saccharomonospora azurea str. M.Goodfel<br>K161=NA128 (type st           |
| Actinobacteria | Nocardiaceae          | sf_1 | 1940 | AB178563.1 | Rhodococcus opacus str. B-4                                              |
| Actinobacteria | Nocardiaceae          | sf_1 | 1834 | AF430047.1 | Nocardia transvalensis str. DSM 43405                                    |
| Actinobacteria | Streptomycetaceae     | sf_1 | 1617 | AF423260.1 | soil clone 41-1                                                          |
| Actinobacteria | Streptomycetaceae     | sf_1 | 1786 | X79851.1   | Streptomyces bikiniensis str. DSM40581                                   |
| Actinobacteria | Thermomonosporaceae   | sf_1 | 1741 | AJ293710.1 | Actinomadura pelletieri str. IMSNU 22169T                                |
| Actinobacteria | Cellulomonadaceae     | sf_1 | 1923 | AJ229245.1 | Actinobacteria str. VeCb6                                                |
| Actinobacteria | Micrococcaceae        | sf_1 | 2020 | AF543278.1 | Rothia dentocariosa str. ChDC B200                                       |
| Actinobacteria | Kineosporiaceae       | sf_1 | 1598 | AY250880.1 | lichen-dominated Antarctic cryptoendolithic<br>community clone FBP402    |
| Actinobacteria | Micromonosporaceae    | sf_1 | 1159 | AJ277568.1 | Actinoplanes durhamensis str. IMSNU 22124T                               |
| Actinobacteria | Mycobacteriaceae      | sf_1 | 1888 | AY012577.2 | Mycobacterium brisbanense str. W6743; ATCC<br>49938                      |
| Actinobacteria | Dermatophilaceae      | sf_1 | 1852 | AB096085.1 | Tonsillophilus suis str. HT1-19                                          |
| Actinobacteria | Micromonosporaceae    | sf_1 | 2051 | D85479.1   | Couchioplanes subsp. caeruleus str. IFO13939                             |
| Actinobacteria | Mycobacteriaceae      | sf_1 | 1204 | M95488.1   | Mycobacterium sp. 3                                                      |
| Actinobacteria | Mycobacteriaceae      | sf_1 | 1365 | AY457072.1 | Mycobacterium chelonae str. CIP 104535T                                  |
| Actinobacteria | Nocardiaceae          | sf_1 | 1432 | AF430055.1 | Nocardia veterana str. DSM 44445                                         |
| Actinobacteria | Coriobacteriaceae     | sf_1 | 1459 | AB089077.1 | termite gut homogenate clone Rs-J59 bacterium                            |
| Actinobacteria | Unclassified          | sf_1 | 1666 |            |                                                                          |
| Actinobacteria | Unclassified          | sf_3 | 1348 | AY250882.1 | lichen-dominated Antarctic cryptoendolithic<br>community clone FBP406    |

|                |                      |      |      |            |                                                                                               |
|----------------|----------------------|------|------|------------|-----------------------------------------------------------------------------------------------|
| Actinobacteria | Streptomycetaceae    | sf_1 | 1375 | AF423240.1 | soil clone 228-1                                                                              |
| Actinobacteria | Streptosporangiaceae | sf_1 | 1158 | X89947.1   | Streptosporangium roseum str. DSM43021T                                                       |
| Actinobacteria | Streptosporangiaceae | sf_1 | 1190 | U48977.1   | Nonomurea polychroma str. IFO 14345                                                           |
| Actinobacteria | Unclassified         | sf_3 | 1130 | X94155.2   | Georgenia muralis str. 1A-C                                                                   |
| Actinobacteria | Micromonosporaceae   | sf_1 | 1972 | AB037011.1 | Actinoplanes regularis str. IFO 12514T                                                        |
| Actinobacteria | Mycobacteriaceae     | sf_1 | 1435 | AJ276890.1 | Mycobacterium cf. triplex 'isolate 23' 23                                                     |
| Actinobacteria | Nocardioidaceae      | sf_1 | 1208 | AF005021.1 | Aeromicrobium erythreum str. NRRL B-3381                                                      |
| Actinobacteria | Mycobacteriaceae     | sf_1 | 1860 | AF251565.1 | Mycobacterium marinum                                                                         |
| Actinobacteria | Thermomonosporaceae  | sf_1 | 1406 | X97890.1   | Actinomadura kijaniata str. DSM 43764T                                                        |
| Actinobacteria | Gordoniaceae         | sf_1 | 1184 | AB065369.1 | Gordonia alkanivorans                                                                         |
| Actinobacteria | Streptomycetaceae    | sf_3 | 1743 | AB026214.1 | Streptomyces scabiei str. DNK-G01                                                             |
| Actinobacteria | Streptomycetaceae    | sf_1 | 1544 | AB022872.1 | Kitasatospora cystarginea str. IFO14836T                                                      |
| Actinobacteria | Streptomycetaceae    | sf_1 | 1771 | D63872.1   | Streptomyces setonii str. ATCC25497                                                           |
| Actinobacteria | Streptosporangiaceae | sf_1 | 1224 | X89941.1   | Acrocarpospora corrugata str. DSM43316T                                                       |
| Actinobacteria | Microbacteriaceae    | sf_1 | 1197 | AF468440.1 | Arctic sea ice ARK10173                                                                       |
| Actinobacteria | Cellulomonadaceae    | sf_1 | 1431 | AB078838.1 | Cellulomonadaceae str. W6                                                                     |
| Actinobacteria | Actinomycetaceae     | sf_1 | 2039 | AJ421779.1 | Actinomyces cardiffensis str. CCUG 44997                                                      |
| Actinobacteria | Micromonosporaceae   | sf_1 | 1488 | AJ277574.1 | Actinoplanes utahensis str. IMSNU 20044T                                                      |
| Actinobacteria | Micromonosporaceae   | sf_1 | 1760 | AJ277583.1 | Actinoplanes roseosporangius str. IMSNU 22133                                                 |
| Actinobacteria | Propionibacteriaceae | sf_1 | 1371 | AJ003057.1 | Propionibacterium granulosum str. DSM 20700                                                   |
| Actinobacteria | Mycobacteriaceae     | sf_1 | 1781 | AF498650.1 | Mycobacterium rhodesiae str. JS60                                                             |
| Actinobacteria | Mycobacteriaceae     | sf_1 | 1885 | AF480593.1 | Mycobacterium neoaurum str. ATCC 25795                                                        |
| Actinobacteria | Unclassified         | sf_2 | 1233 |            |                                                                                               |
| Actinobacteria | Coriobacteriaceae    | sf_1 | 1800 | AJ534681.1 | ground water deep-well injection disposal site<br>radioactive wastes Tomsk-7 clone S15A-MN100 |
| Actinobacteria | Kineosporiaceae      | sf_1 | 1581 | AJ293746.1 | Cryptosporangium aurantiacum str. IMSNU 22120                                                 |
| Actinobacteria | Brevibacteriaceae    | sf_1 | 1745 | X83813.1   | Brevibacterium iodinum str. DSM 2062T                                                         |
| Actinobacteria | Actinomycetaceae     | sf_1 | 2049 | AJ234059.1 | Arcanobacterium haemolyticum str. CIP 103370                                                  |
| Actinobacteria | Micromonosporaceae   | sf_1 | 1931 | X80823.1   | Actinoplanes utahensis str. ATCC 31044                                                        |
| Actinobacteria | Gordoniaceae         | sf_1 | 1545 |            |                                                                                               |
| Actinobacteria | Gordoniaceae         | sf_1 | 1654 | AF416719.1 | Gordonia polyisoprenivorans str. Y2K                                                          |
| Actinobacteria | Rubrobacteraceae     | sf_1 | 1901 | AY039806.1 | earthworm burrow isolate B33D1                                                                |
| Actinobacteria | Streptosporangiaceae | sf_1 | 1587 | AB039960.1 | Nonomurea subsp. roseoviolacea str. SF 2303                                                   |
| Actinobacteria | Microbacteriaceae    | sf_1 | 1804 | AY244784.1 | Microbacterium resistens str. 2002-59119                                                      |
| Actinobacteria | Microbacteriaceae    | sf_1 | 1106 |            |                                                                                               |
| Actinobacteria | Micrococcaceae       | sf_1 | 2063 | M59055.1   | Rothia dentocariosa str. ATCC 17931                                                           |
| Actinobacteria | Micromonosporaceae   | sf_1 | 1689 | AB047516.1 | Actinoplanes yunnanensis str. IFO 14459T                                                      |
| Actinobacteria | Frankiaceae          | sf_1 | 1161 | AJ408876.1 | Frankia sp. MRn2-2                                                                            |
| Actinobacteria | Rubrobacteraceae     | sf_1 | 1739 |            |                                                                                               |
| Actinobacteria | Corynebacteriaceae   | sf_1 | 1192 | AJ439344.1 | Corynebacterium segmentosum str. CIP107068<br>(CCUG37878)                                     |
| Actinobacteria | Corynebacteriaceae   | sf_1 | 1493 | AJ438045.1 | Corynebacterium tuberculostearicum str.<br>CIP102346                                          |
| Actinobacteria | Streptomycetaceae    | sf_1 | 1436 | AF117304.1 | Streptomyces malaysiensis str. ATB-11                                                         |
| Actinobacteria | Micromonosporaceae   | sf_1 | 1542 | AJ277575.1 | Actinoplanes garbadinensis str. IMSNU 20040                                                   |
| Actinobacteria | Micromonosporaceae   | sf_1 | 1766 | X93195.1   | Dactylosporangium salmoneum str. DSM 43910                                                    |
| Actinobacteria | Gordoniaceae         | sf_1 | 1567 |            |                                                                                               |
| Actinobacteria | Nocardiaceae         | sf_1 | 1769 | AF430064.1 | Nocardia sp. str. DSM 46067                                                                   |
| Actinobacteria | Coriobacteriaceae    | sf_1 | 1258 | AJ534678.1 | ground water deep-well injection disposal site<br>radioactive wastes Tomsk-7 clone S15A-MN25  |
| Actinobacteria | Microthrixineae      | sf_1 | 1964 | AF406548.1 | bacterioplankton clone AEGEAN_247                                                             |
| Actinobacteria | Streptosporangiaceae | sf_1 | 1189 | AF191734.1 | Streptosporangium subroseum str. 7113                                                         |
| Actinobacteria | Streptosporangiaceae | sf_1 | 1595 |            |                                                                                               |

|                |                      |      |      |            |                                                                                            |
|----------------|----------------------|------|------|------------|--------------------------------------------------------------------------------------------|
| Actinobacteria | Microbacteriaceae    | sf_1 | 1667 | AB007415.1 | Microbacterium lacticum                                                                    |
| Actinobacteria | Mycobacteriaceae     | sf_1 | 1312 |            |                                                                                            |
| Actinobacteria | Gordoniaceae         | sf_1 | 1191 | X80635.1   | Gordonia amarae str. DSM43392                                                              |
| Actinobacteria | Frankiaceae          | sf_1 | 1644 | AJ408870.1 | Frankia sp. M16467                                                                         |
| Actinobacteria | Kineosporiaceae      | sf_1 | 1087 | AB003931.1 | Kineosporia aurantiaca str. JCM3230                                                        |
| Actinobacteria | Kineosporiaceae      | sf_1 | 1893 | AF095336.1 | Kineosporia aurantiaca str. NRLL B-16913                                                   |
| Actinobacteria | Unclassified         | sf_3 | 1900 |            |                                                                                            |
| Actinobacteria | Nocardiaceae         | sf_1 | 1787 | AF430046.1 | Nocardia pseudovaccinii str. DSM 43406                                                     |
| Actinobacteria | Nocardiaceae         | sf_1 | 1917 | X80611.1   | Nocardia otitidiscaviarum str. DSM43242                                                    |
| Actinobacteria | Coriobacteriaceae    | sf_1 | 1926 | AB011815.1 | Collinsella aerofaciens str. JCM7791                                                       |
| Actinobacteria | Streptomycetaceae    | sf_1 | 1274 | AB006154.1 | Trichotomospora caesia str. IFO14562                                                       |
| Actinobacteria | Streptomycetaceae    | sf_1 | 1639 | X60514.1   | Streptomyces coelicolor str. M145 ssp. A3(2)                                               |
| Actinobacteria | Thermomonosporaceae  | sf_1 | 1669 | AF223348.1 | Pseudonocardiaceae str. PA123                                                              |
| Actinobacteria | Microbacteriaceae    | sf_1 | 1135 | AJ459101.1 | Rhodoglobus vestalii str. LV3                                                              |
| Actinobacteria | Microbacteriaceae    | sf_1 | 1921 | AJ292036.1 | Firmicutes isolate str. d8                                                                 |
| Actinobacteria | Microbacteriaceae    | sf_1 | 1241 | AJ717353.1 | Microbacterium kitamiense CV88                                                             |
| Actinobacteria | Microbacteriaceae    | sf_1 | 1779 | AB042083.1 | Microbacterium sp. str. VKM Ac-2048                                                        |
| Actinobacteria | Microbacteriaceae    | sf_1 | 1186 | AF505514.1 | Cryocola antiquus str. VKM 103PF                                                           |
| Actinobacteria | Cellulomonadaceae    | sf_1 | 1240 | AB078847.1 | Cellulomonadaceae str. WB9                                                                 |
| Actinobacteria | Cellulomonadaceae    | sf_1 | 1449 | AB078851.1 | Cellulomonadaceae str. WB13                                                                |
| Actinobacteria | Cellulomonadaceae    | sf_1 | 1589 | X83806.1   | Oerskovia turbata str. DSM 20577T                                                          |
| Actinobacteria | Dermabacteraceae     | sf_1 | 1504 | AJ415380.1 | Brachybacterium sacelli str. LMG 20338                                                     |
| Actinobacteria | Actinomycetaceae     | sf_1 | 1672 | AJ234041.1 | Actinomyces odontolyticus str. CCUG 28084                                                  |
| Actinobacteria | Mycobacteriaceae     | sf_1 | 1180 | AJ308603.1 | Mycobacterium palustre str. E846                                                           |
| Actinobacteria | Nocardiaceae         | sf_1 | 1146 | AF430068.1 | Nocardia otitidiscaviarum str. S639                                                        |
| Actinobacteria | Nocardiaceae         | sf_1 | 2048 | AF430044.1 | Nocardia uniformis str. DSM 43136                                                          |
| Actinobacteria | Unclassified         | sf_3 | 1201 | AJ347031.1 | sponge clone TK39                                                                          |
| Actinobacteria | Microthrixineae      | sf_1 | 1576 | AF454307.1 | actinobacterium clone ML817J-10                                                            |
| Actinobacteria | Acidimicrobiaceae    | sf_1 | 2030 | AF523914.1 | forested wetland clone RCP1-33                                                             |
| Actinobacteria | Unclassified         | sf_3 | 1486 | AY093463.1 | deep marine sediment clone MB-A2-108                                                       |
| Actinobacteria | Streptomycetaceae    | sf_1 | 1690 | X79325.1   | Streptomyces galbus str. DSM40480                                                          |
| Actinobacteria | Microbacteriaceae    | sf_1 | 1705 |            |                                                                                            |
| Actinobacteria | Microbacteriaceae    | sf_1 | 1098 |            |                                                                                            |
| Actinobacteria | Dermabacteraceae     | sf_1 | 1677 | X91030.1   | Brachybacterium conglomeratum str. NCIB 9859                                               |
| Actinobacteria | Dermabacteraceae     | sf_1 | 1736 | AJ415376.1 | Brachybacterium rhamnosum str. LMG 19848                                                   |
| Actinobacteria | Pseudonocardiaceae   | sf_1 | 1824 | AJ293756.1 | Amycolatopsis sulphurea str. IMSNU 20060T                                                  |
| Actinobacteria | Mycobacteriaceae     | sf_1 | 1317 | AF418956.1 | USA: Colorado Fort Collins Horsetooth Reservoir clone HTDD3                                |
| Actinobacteria | Mycobacteriaceae     | sf_1 | 1637 | AF190800.1 | Mycobacterium austroafricanum str. IFP2173                                                 |
| Actinobacteria | Gordoniaceae         | sf_1 | 1116 | X79286.1   | Gordonia terrae                                                                            |
| Actinobacteria | Corynebacteriaceae   | sf_1 | 1826 | AF537598.1 | Corynebacterium kroppenstedtii National Microbiology Laboratory Special identifier 00-0244 |
| Actinobacteria | Coriobacteriaceae    | sf_1 | 1924 | AF292371.1 | Atopobium rimae str. ATCC49626                                                             |
| Actinobacteria | Coriobacteriaceae    | sf_1 | 2021 | AB089070.1 | termite gut homogenate clone Rs-D41 bacterium                                              |
| Actinobacteria | Acidothermaceae      | sf_1 | 1399 | AJ532700.1 | uranium mill tailings clone Gitt-KF-183                                                    |
| Actinobacteria | Streptomycetaceae    | sf_1 | 1983 | AJ399487.1 | Streptomyces cinnabarinus str. ISP 5467                                                    |
| Actinobacteria | Streptomycetaceae    | sf_1 | 1229 | AF074412.1 | Streptacidiphilus carbonis str. JL 415; DSM 41754                                          |
| Actinobacteria | Intrasporangiaceae   | sf_1 | 1225 | AB030911.1 | Tetrasphaera elongata str. Lp2                                                             |
| Actinobacteria | Intrasporangiaceae   | sf_1 | 1674 | AJ310085.1 | Janibacter terrae str. DSM 13953T                                                          |
| Actinobacteria | Propionibacteriaceae | sf_1 | 1152 | AF287756.1 | Propionibacterium sp. oral strain str. FMA5 oral                                           |
| Actinobacteria | Pseudonocardiaceae   | sf_1 | 1402 |            |                                                                                            |
| Actinobacteria | Nocardiaceae         | sf_1 | 1261 | AF459443.1 | Nocardia caishijiensis str. F829                                                           |
| Actinobacteria | Nocardiaceae         | sf_1 | 1304 | AF421564.1 | Nocardia sp. str. 99-08-244A                                                               |

|                |                     |       |      |            |                                                                       |
|----------------|---------------------|-------|------|------------|-----------------------------------------------------------------------|
| Actinobacteria | Nocardiaceae        | sf_1  | 1805 | AJ303008.1 | Nocardia ignorata str. IMMIB R-1434 DSM 44496 = NRRL B-24141          |
| AD3            | Unclassified        | sf_1  | 2338 | AJ536867.1 | uranium mining waste pile soil clone JG30-KF-C12                      |
| Aquificae      | Unclassified        | sf_1  | 2364 | AY263403.1 | Thermovibrio ammoniificans str. HB-1                                  |
| Bacteroidetes  | Unclassified        | sf_15 | 5573 | AB088930.1 | termite gut homogenate clone Rs-D44 bacterium                         |
| Bacteroidetes  | Unclassified        | sf_6  | 5439 | AF507859.1 | Mono Lake at depth 35 m station 6 July 2000 clone ML635J-40 bacterium |
| Bacteroidetes  | Unclassified        | sf_15 | 5783 | AF507869.2 | Mono Lake at depth 35 m station 6 July 2000 clone ML635J-15 bacterium |
| Bacteroidetes  | Unclassified        | sf_15 | 5874 | AJ441239.1 | hydrothermal vent polychaete mucous clone P. palm A 53                |
| Bacteroidetes  | Unclassified        | sf_4  | 5785 | AF507862.1 | Mono Lake at depth 35 m station 6 July 2000 clone ML635J-56           |
| Bacteroidetes  | Unclassified        | sf_1  | 5951 | AF449785.1 | CFB group clone ML615J-4                                              |
| Bacteroidetes  | Unclassified        | sf_3  | 6298 | AF445661.1 | travertine hot spring clone SM1C04                                    |
| Bacteroidetes  | Sphingobacteriaceae | sf_1  | 5913 | AF409002.1 | Sphingobacteriaceae str. Ellin160                                     |
| Bacteroidetes  | Rikenellaceae       | sf_5  | 5892 | AJ229217.1 | anoxic bulk soil flooded rice microcosm clone BSV73                   |
| Bacteroidetes  | Flavobacteriaceae   | sf_1  | 5352 | AY871820.2 | Riemerella anatipestifer str. H-2565                                  |
| Bacteroidetes  | Flammeovirgaceae    | sf_5  | 6084 | AB078078.1 | Microscilla arenaria str. IFO 15982                                   |
| Bacteroidetes  | Crenotrichaceae     | sf_11 | 6249 | M58790.2   | Haliscomenobacter hydrossis                                           |
| Bacteroidetes  | Blattabacteriaceae  | sf_1  | 5828 | Z35664.1   | Blattabacterium species                                               |
| Bacteroidetes  | Unclassified        | sf_15 | 5475 | AJ249101.1 | SHA-25 clone                                                          |
| Bacteroidetes  | Unclassified        | sf_15 | 5890 | AY218551.1 | penguin droppings sediments clone KD1-125                             |
| Bacteroidetes  | Porphyromonadaceae  | sf_1  | 5295 | AF371910.1 | swine intestine clone p-987-s962-5                                    |
| Bacteroidetes  | Porphyromonadaceae  | sf_1  | 5454 | AY643492.1 | Dysgonomonas wimpennyi str. ANFA2                                     |
| Bacteroidetes  | Unclassified        | sf_15 | 5820 | AY244902.1 | cow rumen clone BF24                                                  |
| Bacteroidetes  | Unclassified        | sf_3  | 5248 | AY274839.1 | Delaware River estuary clone 1G12                                     |
| Bacteroidetes  | Flavobacteriaceae   | sf_1  | 6252 | AF449259.1 | Riftia pachyptila's tube clone R103-B20                               |
| Bacteroidetes  | Unclassified        | sf_15 | 5481 | AJ535258.1 | marine sediment above hydrate ridge clone Hyd89-72 bacterium          |
| Bacteroidetes  | Unclassified        | sf_4  | 5787 | AF507860.1 | Mono Lake at depth 35 m station 6 July 2000 clone ML635J-1 bacterium  |
| Bacteroidetes  | Unclassified        | sf_3  | 6168 | AF534435.1 | Toolik Lake main station at 3 m depth clone TLM11/TLMdgge04           |
| Bacteroidetes  | Flexibacteraceae    | sf_19 | 5667 | AY218749.1 | penguin droppings sediments clone KD6-118                             |
| Bacteroidetes  | Sphingobacteriaceae | sf_1  | 5513 | AF385549.1 | crevicular epithelial cells clone AZ123                               |
| Bacteroidetes  | Bacteroidaceae      | sf_12 | 5256 | AB088925.1 | termite gut homogenate clone Rs-D38 bacterium                         |
| Bacteroidetes  | Unclassified        | sf_15 | 6069 | AJ289174.1 | corneal ulcer clone E1-K9                                             |
| Bacteroidetes  | Porphyromonadaceae  | sf_1  | 5817 | AB088927.2 | termite gut homogenate clone Rs-N56 bacterium                         |
| Bacteroidetes  | Porphyromonadaceae  | sf_1  | 5961 | AJ488070.1 | chlorobenzene-degrading consortium clone IA-16                        |
| Bacteroidetes  | Porphyromonadaceae  | sf_1  | 5510 | AF524856.1 | sphagnum peat bog clone 26-4b2                                        |
| Bacteroidetes  | Porphyromonadaceae  | sf_1  | 6012 | AJ400264.1 | mouse feces clone L11-6                                               |
| Bacteroidetes  | Prevotellaceae      | sf_1  | 6011 | AB185583.1 | rumen clone F24-B03                                                   |
| Bacteroidetes  | Prevotellaceae      | sf_1  | 6152 | AF001768.1 | rumen clone RF37                                                      |
| Bacteroidetes  | Porphyromonadaceae  | sf_1  | 5460 | AJ400267.2 | mouse feces clone F8                                                  |
| Bacteroidetes  | Prevotellaceae      | sf_1  | 5484 | AY134905.1 | oral periodontitis clone FX046                                        |
| Bacteroidetes  | Prevotellaceae      | sf_1  | 5769 | AB081578.1 | Bacteroidaceae str. A42                                               |
| Bacteroidetes  | Prevotellaceae      | sf_1  | 5905 | AF371893.1 | swine intestine clone p-2443-18B5                                     |
| Bacteroidetes  | Prevotellaceae      | sf_1  | 5946 | AF385511.1 | tongue dorsa clone DO027                                              |
| Bacteroidetes  | Prevotellaceae      | sf_1  | 6047 | AY093462.1 | deep marine sediment clone MB-A2-107                                  |
| Bacteroidetes  | Flavobacteriaceae   | sf_1  | 5997 | M62797.1   | Flavobacterium aquatile                                               |
| Bacteroidetes  | Flavobacteriaceae   | sf_1  | 5991 | AB032506.1 | Tenacibaculum ovolyticum str. IAM14318                                |

|               |                     |       |       |            |                                                                                                     |
|---------------|---------------------|-------|-------|------------|-----------------------------------------------------------------------------------------------------|
| Bacteroidetes | Flavobacteriaceae   | sf_1  | 5971  | M62799.1   | Cytophaga uliginosa                                                                                 |
| Bacteroidetes | Sphingobacteriaceae | sf_1  | 6158  | AF538748.1 | municipal wastewater treatment bioreactor isolate str. CAGY10                                       |
| Bacteroidetes | Crenotrichaceae     | sf_11 | 6267  | AF316115.1 | Cilia- respiratory isolate str. 243-54                                                              |
| Bacteroidetes | Flexibacteraceae    | sf_19 | 5372  |            |                                                                                                     |
| Bacteroidetes | Flexibacteraceae    | sf_19 | 5566  | AY264838.1 | Hongiella mannitolivorans str. IMSNU 14012 JC2050                                                   |
| Bacteroidetes | Flexibacteraceae    | sf_19 | 6124  | AB078054.1 | Flexibacter flexilis subsp. pelliculosus str. IFO 16028 subsp.                                      |
| Bacteroidetes | Prevotellaceae      | sf_1  | 5398  | AY699286.1 | Prevotella ruminicola L16                                                                           |
| Bacteroidetes | Prevotellaceae      | sf_1  | 5916  | AY244931.1 | cow rumen clone BE14                                                                                |
| Bacteroidetes | Prevotellaceae      | sf_1  | 5940  | AF481226.1 | Prevotella sp. str. E7_34                                                                           |
| Bacteroidetes | Unclassified        | sf_15 | 5957  | AJ441217.1 | hydrothermal vent polychaete mucous clone P. palm C/A 20                                            |
| Bacteroidetes | Unclassified        | sf_15 | 5544  | AY188304.1 | marine? clone KD3-17                                                                                |
| Bacteroidetes | Bacteroidaceae      | sf_12 | 5320  | M86695.1   | Bacteroides distasonis                                                                              |
| Bacteroidetes | Prevotellaceae      | sf_1  | 5403  | AJ006457.1 | Prevotella bryantii str. B14 (DSM 11371 species )                                                   |
| Bacteroidetes | Prevotellaceae      | sf_1  | 5249  | AY323524.1 | Prevotella denticola str. ATCC 35308                                                                |
| Bacteroidetes | Prevotellaceae      | sf_1  | 5331  | AF385519.1 | tongue dorsa clone DO022                                                                            |
| Bacteroidetes | Prevotellaceae      | sf_1  | 6239  | AF385512.1 | tongue dorsa clone DO033                                                                            |
| Bacteroidetes | Flavobacteriaceae   | sf_1  | 5915  | AJ534682.1 | ground water deep-well injection disposal site radioactive wastes Tomsk-7 clone S15A-MN27 bacterium |
| Bacteroidetes | Flavobacteriaceae   | sf_1  | 6274  |            |                                                                                                     |
| Bacteroidetes | Flavobacteriaceae   | sf_1  | 5317  | AB078057.1 | Tenacibaculum maritimum str. IFO 15946                                                              |
| Bacteroidetes | Flavobacteriaceae   | sf_1  | 5942  |            |                                                                                                     |
| Bacteroidetes | Flavobacteriaceae   | sf_1  | 5473  |            |                                                                                                     |
| Bacteroidetes | Flavobacteriaceae   | sf_1  | 5914  | AY771714.1 | Psychroserpens burtonensis str. S2-64                                                               |
| Bacteroidetes | Unclassified        | sf_15 | 6324  | AY216445.1 | temperate estuarine mud clone KM02                                                                  |
| Bacteroidetes | Crenotrichaceae     | sf_11 | 5619  | AY211072.1 | anaerobic VC-degrading enrichment clone VC10 bacterium                                              |
| Bacteroidetes | Crenotrichaceae     | sf_11 | 6123  | AB078055.1 | Flexibacter japonensis str. IFO 16041                                                               |
| Bacteroidetes | Unclassified        | sf_15 | 6233  | AY134906.1 | oral periodontitis clone FX069                                                                      |
| Bacteroidetes | Porphyromonadaceae  | sf_1  | 5713  | X82823.1   | Porphyromonas catoniae str. ATCC 51270                                                              |
| Bacteroidetes | Prevotellaceae      | sf_1  | 6259  |            |                                                                                                     |
| Bacteroidetes | Flavobacteriaceae   | sf_1  | 5401  | AF543295.1 | Capnocytophaga gingivalis str. ChDC OS45                                                            |
| Bacteroidetes | Flavobacteriaceae   | sf_1  | 6248  | AY005073.1 | Capnocytophaga sp. oral strain str. S3                                                              |
| Bacteroidetes | Flavobacteriaceae   | sf_1  | 5267  | AF406541.1 | bacterioplankton clone AEGEAN_179                                                                   |
| Bacteroidetes | Flavobacteriaceae   | sf_1  | 6269  | AY080916.1 | acidic forest soil clone UC1                                                                        |
| Bacteroidetes | Unclassified        | sf_4  | 5703  |            |                                                                                                     |
| Bacteroidetes | Sphingobacteriaceae | sf_1  | 5492  | AF492000.1 | Sphingobacterium sp. str. HC-6155                                                                   |
| Bacteroidetes | Flavobacteriaceae   | sf_1  | 6104  |            |                                                                                                     |
| Bacteroidetes | Bacteroidaceae      | sf_12 | 5950  |            |                                                                                                     |
| Bacteroidetes | Flavobacteriaceae   | sf_1  | 5730  |            |                                                                                                     |
| Bacteroidetes | Flexibacteraceae    | sf_19 | 5563  | AB073573.2 | Cytophaga sp. I-545                                                                                 |
| Bacteroidetes | Flavobacteriaceae   | sf_1  | 5436  | AF468406.1 | Arctic sea ice ARK10004                                                                             |
| Bacteroidetes | Flexibacteraceae    | sf_19 | 5602  |            |                                                                                                     |
| Bacteroidetes | Flexibacteraceae    | sf_19 | 5994  | AJ549285.1 | Hymenobacter sp. str. NS/50                                                                         |
| Bacteroidetes | Flexibacteraceae    | sf_20 | 10311 | AJ431236.1 | Cytophaga sp. str. BHI60-57B                                                                        |
| Bacteroidetes | Flexibacteraceae    | sf_19 | 6297  | AF502211.1 | EBPR sludge lab scale clone HP1A92                                                                  |
| Bacteroidetes | Flavobacteriaceae   | sf_1  | 5726  | AY008691.1 | Bergeyella sp. oral AK152 clone                                                                     |
| Bacteroidetes | Flavobacteriaceae   | sf_1  | 5906  | X67609.1   | Capnocytophaga sputigena str. ATCC 33612                                                            |
| Bacteroidetes | Unclassified        | sf_15 | 5784  | AY838556.1 | fruiting body Pleurotus eryngii clone PE01                                                          |

|               |                    |       |      |             |                                                                                           |
|---------------|--------------------|-------|------|-------------|-------------------------------------------------------------------------------------------|
| Bacteroidetes | Porphyromonadaceae | sf_1  | 5800 | AY253728.1  | Porphyromonas endodontalis str. ATCC 35406                                                |
| Bacteroidetes | Prevotellaceae     | sf_1  | 5718 | AF183403.1  | Prevotella tannerae str. 29-1                                                             |
| Bacteroidetes | Prevotellaceae     | sf_1  | 5706 | U43698.1    | oral cavity clone 3.3                                                                     |
| Bacteroidetes | Unclassified       | sf_1  | 5745 |             |                                                                                           |
| Bacteroidetes | Crenotrichaceae    | sf_11 | 6143 | AF534433.1  | Toolik Lake main station at 3 m depth clone TLM09/TLMdgge12a                              |
| Bacteroidetes | Flexibacteraceae   | sf_19 | 6261 | AF468338.1  | Arctic sea ice cryoconite clone ARKCRY-50                                                 |
| Bacteroidetes | Flexibacteraceae   | sf_19 | 5542 | AB073595.2  | Cytophaga sp. I-1787                                                                      |
| Bacteroidetes | Flavobacteriaceae  | sf_1  | 5836 | U41348.1    | Capnocytophaga granulosa str. LMG 12119; FDC SD4                                          |
| Bacteroidetes | Flavobacteriaceae  | sf_1  | 5969 | U41350.1    | Capnocytophaga ochracea str. ATCC 27872 T                                                 |
| Bacteroidetes | Flavobacteriaceae  | sf_1  | 5955 | AJ244701.1  | Flavobacterium sp. str. V4.MS.29 = MM_2747                                                |
| Bacteroidetes | Unclassified       | sf_15 | 5355 | AJ306736.1  | DCP-dechlorinating consortium clone SHA-5                                                 |
| Bacteroidetes | Crenotrichaceae    | sf_11 | 5463 | AB078068.1  | Flexibacter sancti str. IFO 16034                                                         |
| Bacteroidetes | Rikenellaceae      | sf_5  | 5889 | AB088945.1  | termite gut homogenate clone Rs-F73 bacterium                                             |
| Bacteroidetes | Prevotellaceae     | sf_1  | 5437 | AY244919.1  | cow rumen clone BE1                                                                       |
| Bacteroidetes | Prevotellaceae     | sf_1  | 5426 | AF385509.1  | tongue dorsa clone DO014                                                                  |
| Bacteroidetes | Crenotrichaceae    | sf_11 | 5334 | AB117715.1  | autotrophic nitrifying biofilm clone NB-11                                                |
| Bacteroidetes | Flexibacteraceae   | sf_19 | 5366 | AB078061.1  | Flexibacter roseolus str. IFO 16030                                                       |
| Bacteroidetes | Unclassified       | sf_15 | 5353 | AF529128.1  | trichloroethene-contaminated site clone FTLpost3 bacterium                                |
| Bacteroidetes | Prevotellaceae     | sf_1  | 6066 | AY207061.1  | human mouth isolate str. P4P_62                                                           |
| Bacteroidetes | Prevotellaceae     | sf_1  | 5893 | AF385515.1  | tongue dorsa clone DO045                                                                  |
| Bacteroidetes | Flavobacteriaceae  | sf_1  | 5423 | AF170754.1  | Aequorivita antarctica str. QSSC9-14                                                      |
| Bacteroidetes | Flavobacteriaceae  | sf_1  | 5521 | AF493689.1  | Flavobacteriaceae str. SW269                                                              |
| Bacteroidetes | Prevotellaceae     | sf_1  | 5926 | AY244900.1  | cow rumen clone BF22                                                                      |
| Bacteroidetes | Flavobacteriaceae  | sf_1  | 5367 | AY238333.1  | patient's bronchoalveolar lavage isolate str. MDA2507 sp.                                 |
| Bacteroidetes | Unclassified       | sf_15 | 5511 | AJ535256.1  | marine sediment above hydrate ridge clone Hyd-B2-1 bacterium                              |
| Bacteroidetes | Unclassified       | sf_15 | 5578 | AJ534685.1  | ground water deep-well injection disposal site radioactive wastes Tomsk-7 clone S15A-MN91 |
| Bacteroidetes | Rikenellaceae      | sf_5  | 5947 | AJ441218.1  | hydrothermal vent polychaete mucous clone P. palm C/A 221                                 |
| Bacteroidetes | Porphyromonadaceae | sf_1  | 5429 |             |                                                                                           |
| Bacteroidetes | Flavobacteriaceae  | sf_1  | 6246 | AF385569.1  | crevicular epithelial cells clone BU084                                                   |
| Bacteroidetes | Crenotrichaceae    | sf_11 | 5888 | AY218661.1  | penguin droppings sediments clone KD9-169                                                 |
| Bacteroidetes | Prevotellaceae     | sf_1  | 5720 | AF481227.1  | Prevotella sp. str. E9_34                                                                 |
| Bacteroidetes | Flavobacteriaceae  | sf_1  | 5301 |             |                                                                                           |
| Bacteroidetes | Flavobacteriaceae  | sf_1  | 5933 | AB015481.1  | Flavobacterium columnare str. PH-97028 (IAM 14821)                                        |
| Bacteroidetes | Flavobacteriaceae  | sf_1  | 5589 |             |                                                                                           |
| Bacteroidetes | Unclassified       | sf_15 | 5257 | AY188307.1  | marine? clone KD3-67                                                                      |
| Bacteroidetes | Bacteroidaceae     | sf_6  | 5792 | AF513095.1  | activated sludge foam clone 47                                                            |
| Bacteroidetes | Flexibacteraceae   | sf_19 | 5307 | AB078082.1  | Microscilla sericea str. IFO 16561                                                        |
| BRC1          | Unclassified       | sf_2  | 118  | AY218548.1  | penguin droppings sediments clone KD1-1                                                   |
| BRC1          | Unclassified       | sf_1  | 5051 | AJ390454.1  | soil clone PBS-III-24                                                                     |
| BRC1          | Unclassified       | sf_1  | 5143 | AJ390438.1  | soil clone PBS-II-1                                                                       |
| Caldithrix    | Caldithraceae      | sf_2  | 91   | AF323775.1  | benzoate-degrading consortium clone BA059                                                 |
| Caldithrix    | Caldithraceae      | sf_1  | 2384 | AF286032.1  | saltmarsh clone LCP-89                                                                    |
| Chlamydiae    | Parachlamydiaceae  | sf_1  | 4964 | AY082465.1  | neutral pH mine biofilm clone 44a-B1-34                                                   |
| Chlamydiae    | Chlamydiaceae      | sf_1  | 4820 | NC_002179.2 | Chlamydomphila pneumoniae str. AR39                                                       |
| Chlorobi      | Chlorobiaceae      | sf_1  | 262  | Y18253.1    | Chlorobium ferrooxidans DSM 13031 str. KofoX                                              |

|                     |               |       |      |            |                                                                                  |
|---------------------|---------------|-------|------|------------|----------------------------------------------------------------------------------|
| Chlorobi            | Unclassified  | sf_9  | 6146 | AF234699.1 | sludge clone A12b                                                                |
| Chlorobi            | Unclassified  | sf_8  | 636  | AY118152.1 | benzene-degrading nitrate-reducing consortium clone Cart-N3 bacterium            |
| Chlorobi            | Chlorobiaceae | sf_1  | 859  | Y08105.1   | Chlorobium phaeovibrioides str. 2631                                             |
| Chlorobi            | Unclassified  | sf_6  | 5294 | AY221073.1 | Mammoth cave clone CCM9b                                                         |
| Chlorobi            | Chlorobiaceae | sf_1  | 995  | AB054671.1 | Chlorobium limicola str. M1                                                      |
| Chlorobi            | Unclassified  | sf_8  | 5822 | AJ428454.1 | Saltmarsh mud clone K-790                                                        |
| Chlorobi            | Unclassified  | sf_8  | 549  | AY118151.1 | benzene-degrading nitrate-reducing consortium clone Cart-N2 bacterium            |
| Chloroflexi         | Unclassified  | sf_5  | 1051 | AY913277.1 | forest soil clone JUNssu055 (-2B) (OTU#087)                                      |
| Chloroflexi         | Unclassified  | sf_9  | 205  | AJ532729.1 | uranium mining waste pile clone JG34-KF-221                                      |
| Chloroflexi         | Unclassified  | sf_9  | 375  | AF507690.1 | forest soil clone C043                                                           |
| Chloroflexi         | Unclassified  | sf_9  | 946  | AY216458.1 | temperate estuarine mud clone KM87                                               |
| Chloroflexi         | Unclassified  | sf_1  | 2367 | AY093473.1 | deep marine sediment clone MB-B2-113                                             |
| Chloroflexi         | Unclassified  | sf_1  | 2438 | AY093464.1 | deep marine sediment clone MB-A2-110                                             |
| Chloroflexi         | Unclassified  | sf_1  | 2485 |            |                                                                                  |
| Chloroflexi         | Unclassified  | sf_1  | 2497 | AF524015.1 | forested wetland clone FW60                                                      |
| Chloroflexi         | Unclassified  | sf_2  | 818  |            |                                                                                  |
| Chloroflexi         | Unclassified  | sf_9  | 727  | AF507692.1 | forest soil clone S0208                                                          |
| Chloroflexi         | Unclassified  | sf_2  | 2344 | AF507700.1 | forest soil clone C083                                                           |
| Chloroflexi         | Unclassified  | sf_1  | 258  | AJ306793.1 | DCP-dechlorinating consortium clone SHD-14                                       |
| Chloroflexi         | Unclassified  | sf_1  | 2534 | AF507693.1 | forest soil clone S085                                                           |
| Chloroflexi         | Unclassified  | sf_1  | 2339 | AJ519643.1 | uranium mill tailings soil sample clone Sh765B-TzT-20 bacterium                  |
| Chloroflexi         | Unclassified  | sf_1  | 106  | AJ306798.1 | DCP-dechlorinating consortium clone SHD-231                                      |
| Chloroflexi         | Unclassified  | sf_9  | 576  | AJ306746.2 | DCP-dechlorinating consortium clone SHA-36                                       |
| Chloroflexi         | Unclassified  | sf_7  | 757  | AJ306741.2 | DCP-dechlorinating consortium clone SHA-8                                        |
| Chloroflexi         | Unclassified  | sf_1  | 1041 | AY250886.1 | Antarctic cryptoendolith clone FBP471                                            |
| Chloroflexi         | Unclassified  | sf_9  | 72   | AY221035.1 | sediments collected at Charon's Cascade near Echo River October 2000 clone CCD21 |
| Chloroflexi         | Unclassified  | sf_1  | 583  | AJ278171.2 | anaerobic bioreactor clone SHD-238                                               |
| Chloroflexi         | Unclassified  | sf_12 | 2523 | AJ347055.1 | sponge clone TK10                                                                |
| Chloroflexi         | Unclassified  | sf_2  | 789  | AF445676.1 | travertine hot spring clone SM1D10                                               |
| Chloroflexi         | Unclassified  | sf_1  | 927  | AJ441227.1 | hydrothermal vent polychaete mucous clone P. palm C 37                           |
| Chloroflexi         | Unclassified  | sf_1  | 765  | AJ278167.1 | anaerobic bioreactor clone SHD-71                                                |
| Chloroflexi         | Unclassified  | sf_1  | 76   | AJ306749.1 | DCP-dechlorinating consortium clone SHA-147                                      |
| Chloroflexi         | Unclassified  | sf_1  | 2397 | AY093480.1 | deep marine sediment clone MB-C2-127                                             |
| Chloroflexi         | Unclassified  | sf_9  | 2539 | AY218649.1 | penguin droppings sediments clone KD4-96                                         |
| Chloroflexi         | Unclassified  | sf_2  | 2532 | AF529110.1 | trichloroethene-contaminated site clone FTL276 bacterium                         |
| Chloroflexi         | Unclassified  | sf_1  | 266  |            |                                                                                  |
| Chloroflexi         | Unclassified  | sf_1  | 1071 | AJ412677.1 | denitrifying reactor clone 131                                                   |
| Chloroflexi         | Unclassified  | sf_1  | 159  | AJ278169.1 | anaerobic bioreactor clone SHD-235                                               |
| Chloroflexi         | Unclassified  | sf_1  | 374  | AF507691.1 | forest soil clone S041                                                           |
| Chloroflexi         | Unclassified  | sf_5  | 635  | AF418964.1 | USA: Colorado Fort Collins Horsetooth Reservoir clone HTH4                       |
| Chloroflexi         | Unclassified  | sf_1  | 905  | AF154100.1 | hydrocarbon seep clone GCA112                                                    |
| Chloroflexi         | Unclassified  | sf_1  | 2370 | AF004928.2 | Dehalococcoides ethenogenes str. strain 195                                      |
| Coprothermobacteria | Unclassified  | sf_1  | 751  | AJ431258.1 | Coprothermobacter sp. str. Dex80-3                                               |
| Crenarchaeota       | Unclassified  | sf_1  | 2587 | AB019729.1 | hydrothermal vent clone pIVWA11                                                  |
| Cyanobacteria       | Unclassified  | sf_1  | 5190 | AF091110.1 | Plectonema sp. str. F3                                                           |
| Cyanobacteria       | Chloroplasts  | sf_5  | 5147 | X82156.1   | Emiliania huxleyi str. Plymouth Marine Laborator                                 |

| PML 92              |                 |       |      |            |                                                                                   |
|---------------------|-----------------|-------|------|------------|-----------------------------------------------------------------------------------|
| Cyanobacteria       | Unclassified    | sf_5  | 4998 |            |                                                                                   |
| Cyanobacteria       | Chloroplasts    | sf_5  | 4967 | AF534438.1 | Toolik Lake main station at 3 m depth clone TLM14                                 |
| Cyanobacteria       | Unclassified    | sf_8  | 5206 |            |                                                                                   |
| Cyanobacteria       | Unclassified    | sf_5  | 5030 | AY034793.1 | Hapalosiphon welwitschii                                                          |
| Cyanobacteria       | Chloroplasts    | sf_13 | 5000 | U67742.1   | Mitrostema yamamotoi                                                              |
| Cyanobacteria       | Unclassified    | sf_1  | 5189 | AB039015.1 | Oscillatoria sancta str. PCC 7515                                                 |
| Cyanobacteria       | Unclassified    | sf_1  | 5001 | AJ347056.1 | sponge clone TK09                                                                 |
| Cyanobacteria       | Chloroplasts    | sf_5  | 5130 | AF445714.1 | travertine hot spring clone SM2B11                                                |
| Cyanobacteria       | Chloroplasts    | sf_5  | 5006 |            |                                                                                   |
| Cyanobacteria       | Chloroplasts    | sf_11 | 5098 | AF289245.1 | Euglena tripteris str. UW OB                                                      |
| Cyanobacteria       | Chloroplasts    | sf_11 | 5123 | AF289249.1 | Lepocinclis fusiformis str. ACOI 1025                                             |
| Cyanobacteria       | Chloroplasts    | sf_5  | 4966 | AF244549.1 | Adiantum pedatum                                                                  |
| Cyanobacteria       | Chloroplasts    | sf_5  | 4976 | AF244550.1 | Calypogeia muelleriana                                                            |
| Cyanobacteria       | Chloroplasts    | sf_5  | 5040 | Y18934.1   | Solanum nigrum                                                                    |
| Cyanobacteria       | Chloroplasts    | sf_5  | 5182 | M81884.1   | Epifagus virginiana -- chloroplast                                                |
| Cyanobacteria       | Chloroplasts    | sf_5  | 5183 | M37430.1   | Pisum sativum -- chloroplast                                                      |
| Cyanobacteria       | Chloroplasts    | sf_5  | 5192 | AF244551.1 | Cycas revoluta                                                                    |
| Cyanobacteria       | Unclassified    | sf_1  | 5057 | AJ781148.1 | Nodularia sphaerocarpa str. UTEX B 2093                                           |
| Cyanobacteria       | Unclassified    | sf_9  | 5038 | AF544207.1 | Rumen isolate str. YS2                                                            |
| Cyanobacteria       | Unclassified    | sf_1  | 5034 | AF329394.1 | Spirulina subsalsa str. FACHB351                                                  |
| Cyanobacteria       | Unclassified    | sf_1  | 5049 | AF420444.1 | Oscillatoria spongelliae str. 520bg                                               |
| Cyanobacteria       | Unclassified    | sf_9  | 5164 | AB089123.1 | termite gut homogenate clone Rs-H34                                               |
| Cyanobacteria       | Unclassified    | sf_5  | 5015 | AB093489.1 | Chlorogloeopsis fritschii str. PCC 6912                                           |
| Cyanobacteria       | Unclassified    | sf_5  | 5027 |            |                                                                                   |
| Cyanobacteria       | Unclassified    | sf_6  | 5186 | AY222299.1 | silica sinter depositing geothermal power station discharge drain clone ST01-SN2C |
| Cyanobacteria       | Unclassified    | sf_1  | 5219 | AF448074.1 | Synechococcus sp. str. UH7                                                        |
| Cyanobacteria       | Unclassified    | sf_1  | 5010 | AF170757.1 | LPP-group cyanobacterium isolate str. QSSC5cya                                    |
| Cyanobacteria       | Unclassified    | sf_1  | 5210 | AY250881.1 | QSSC5cya<br>lichen-dominated Antarctic cryptoendolithic community clone FBP403    |
| Cyanobacteria       | Chloroplasts    | sf_5  | 5112 | X52985.1   | Cyanidium caldarium str. 14-1-1                                                   |
| Cyanobacteria       | Unclassified    | sf_5  | 5064 | AB003168.1 | Oscillatoria neglecta str. M-82                                                   |
| Cyanobacteria       | Chloroplasts    | sf_5  | 5166 |            |                                                                                   |
| Cyanobacteria       | Unclassified    | sf_5  | 5188 | AY163573.1 | Acaryochloris marina str. MBIC11017                                               |
| Cyanobacteria       | Chloroplasts    | sf_5  | 5060 | X82155.1   | Skeletonema pseudocostatum str. CSIRO CS-76                                       |
| Cyanobacteria       | Unclassified    | sf_1  | 4978 | AB058225.1 | LPP-group isolate str. MBIC10087                                                  |
| Cyanobacteria       | Chloroplasts    | sf_5  | 5039 | U70723.1   | Cape Hatteras picoplankton clone OM270                                            |
| Cyanobacteria       | Unclassified    | sf_5  | 270  | AY328558.1 | drinking water system simulator clone HOCiC9                                      |
| Deinococcus-Thermus | Unclassified    | sf_3  | 920  |            |                                                                                   |
| Deinococcus-Thermus | Unclassified    | sf_1  | 563  | AJ507298.1 | Vulcanithermus mediatlanticus str. TR                                             |
| Deinococcus-Thermus | Unclassified    | sf_2  | 637  | AF513964.1 | hypersaline pond clone LA7-B27N                                                   |
| Deinococcus-Thermus | Unclassified    | sf_1  | 178  | AY028380.1 | Thermus sp. str. C4                                                               |
| Dictyoglomi         | Dictyoglomaceae | sf_9  | 7579 | AF353224.1 | marine clone Arctic96B-6                                                          |
| DSS1                | Unclassified    | sf_2  | 38   | AJ306783.1 | DCP-dechlorinating consortium clone SHA-109                                       |
| Firmicutes          | Unclassified    | sf_17 | 2324 |            |                                                                                   |
| Firmicutes          | Unclassified    | sf_1  | 2351 | Y11574.1   | Desulfotomaculum thermobenzoicum str. DSM 6193                                    |
| Firmicutes          | Unclassified    | sf_1  | 2388 | AF465653.1 | G+C Gram-positive clone YNPRH70A                                                  |
| Firmicutes          | Unclassified    | sf_1  | 2443 | Y11573.1   | Desulfotomaculum thermoacetoxidans str. DSM 5813                                  |
| Firmicutes          | Unclassified    | sf_1  | 2490 | AY084078.1 | Desulfotomaculum solfataricum str. V21                                            |



|            |                         |       |      |            |                                                                                |
|------------|-------------------------|-------|------|------------|--------------------------------------------------------------------------------|
| Firmicutes | Unclassified            | sf_1  | 77   | AF391988.1 | thermal soil clone YNPFFP9                                                     |
| Firmicutes | Unclassified            | sf_17 | 3476 |            |                                                                                |
| Firmicutes | Unclassified            | sf_17 | 4168 |            |                                                                                |
| Firmicutes | Unclassified            | sf_4  | 4503 | AB088976.1 | termite gut homogenate clone Rs-H83 bacterium                                  |
| Firmicutes | Unclassified            | sf_8  | 4536 | AF507891.1 | Mono Lake at depth 35m station 6 July 2000 clone ML635J-14 G+C                 |
| Firmicutes | Unclassified            | sf_7  | 4216 |            |                                                                                |
| Firmicutes | Unclassified            | sf_1  | 4293 | AB089008.1 | termite gut homogenate clone Rs-Q01 bacterium                                  |
| Firmicutes | Unclassified            | sf_1  | 4616 | AB185532.1 | rumen clone F23-C12                                                            |
| Firmicutes | Streptococcaceae        | sf_1  | 3422 | X68418.1   | Streptococcus thermophilus str. DSM 20617                                      |
| Firmicutes | Streptococcaceae        | sf_1  | 3499 | AF104676.1 | Streptococcus constellatus str. ATCC27823                                      |
| Firmicutes | Streptococcaceae        | sf_1  | 3685 | AF003931.1 | Streptococcus gordonii str. ATCC 10558                                         |
| Firmicutes | Peptostreptococcaceae   | sf_5  | 2694 | AY134903.1 | oral periodontitis clone FX028                                                 |
| Firmicutes | Peptostreptococcaceae   | sf_5  | 2714 | AB088954.2 | termite gut homogenate clone Rs-N27 bacterium                                  |
| Firmicutes | Peptostreptococcaceae   | sf_5  | 2805 | AY134904.1 | oral periodontitis clone FX033                                                 |
| Firmicutes | Peptostreptococcaceae   | sf_5  | 224  | AB109771.1 | Finegoldia magna str. ATCC 29328                                               |
| Firmicutes | Peptostreptococcaceae   | sf_5  | 58   | AF481225.1 | Peptostreptococcus sp. str. E3_32                                              |
| Firmicutes | Peptostreptococcaceae   | sf_5  | 393  | AF542229.1 | Anaerococcus vaginalis str. CCUG 31349                                         |
| Firmicutes | Peptococc/Acidaminococc | sf_11 | 709  | AB017195.1 | Selenomonas ruminantium str.S20                                                |
| Firmicutes | Peptococc/Acidaminococc | sf_11 | 131  | AF349425.1 | pig feces clone                                                                |
| Firmicutes | Peptococc/Acidaminococc | sf_11 | 992  | AJ229198.1 | anoxic bulk soil flooded rice microcosm clone BSV43 clone                      |
| Firmicutes | Mycoplasmataceae        | sf_1  | 3929 | AY191226.1 | Mycoplasma gypsibengalensis str. Gb-V33                                        |
| Firmicutes | Lachnospiraceae         | sf_5  | 2668 | AB088998.1 | termite gut homogenate clone Rs-G40 bacterium                                  |
| Firmicutes | Lachnospiraceae         | sf_5  | 2994 | AB100463.1 | termite gut clone Rs-L15                                                       |
| Firmicutes | Lachnospiraceae         | sf_5  | 2931 | AB088994.1 | termite gut homogenate clone Rs-G77 bacterium                                  |
| Firmicutes | Lachnospiraceae         | sf_5  | 3060 | AB089002.1 | termite gut homogenate clone Rs-B14 bacterium                                  |
| Firmicutes | Lachnospiraceae         | sf_5  | 3218 | AB089000.1 | termite gut homogenate clone Rs-N53                                            |
| Firmicutes | Lachnospiraceae         | sf_5  | 4510 | AB089034.1 | termite gut homogenate clone Rs-Q53 bacterium                                  |
| Firmicutes | Lachnospiraceae         | sf_5  | 4540 | AB088968.1 | termite gut homogenate clone Rs-M18 bacterium                                  |
| Firmicutes | Lachnospiraceae         | sf_5  | 4571 | X85022.1   | Faecalibacterium prausnitzii str. ATCC 27766                                   |
| Firmicutes | Lachnospiraceae         | sf_5  | 4613 | AB034003.1 | rumen clone 3C0d-3                                                             |
| Firmicutes | Erysipelotrichaceae     | sf_3  | 3952 | AB055907.1 | Erysipelothrix rhusiopathiae str. Pecs 56                                      |
| Firmicutes | Erysipelotrichaceae     | sf_3  | 3965 | AY133091.1 | TCE-contaminated site clone ccsIm238                                           |
| Firmicutes | Erysipelotrichaceae     | sf_3  | 3981 | AY128088.1 | phototrophic sludge clone PSB-M-3                                              |
| Firmicutes | Erysipelotrichaceae     | sf_3  | 768  |            |                                                                                |
| Firmicutes | Enterococcaceae         | sf_1  | 3288 | AY167946.1 | Isolation and identification hyper-ammonia producing swine storage pits manure |
| Firmicutes | Enterococcaceae         | sf_1  | 3433 | D88824.1   | Tetragenococcus muraticus                                                      |
| Firmicutes | Enterococcaceae         | sf_1  | 3598 | AJ301840.1 | Enterococcus solitarius str. DSM 5634                                          |
| Firmicutes | Enterococcaceae         | sf_1  | 3881 | AJ301829.1 | Enterococcus dispar str. LMG 13521                                             |
| Firmicutes | Clostridiaceae          | sf_12 | 4300 | AB100493.1 | termite gut clone Rs-060                                                       |
| Firmicutes | Clostridiaceae          | sf_12 | 4364 | AF481208.1 | oral endodontic infection clone MCE3_9                                         |
| Firmicutes | Clostridiaceae          | sf_12 | 4477 | AB089042.1 | termite gut homogenate clone Rs-N85 bacterium                                  |
| Firmicutes | Clostridiaceae          | sf_12 | 4502 |            |                                                                                |
| Firmicutes | Clostridiaceae          | sf_12 | 4554 | AB100479.1 | termite gut clone Rs-068                                                       |
| Firmicutes | Clostridiaceae          | sf_12 | 4266 | AB088951.1 | termite gut homogenate clone Rs-M86 bacterium                                  |
| Firmicutes | Clostridiaceae          | sf_12 | 4321 | AB089045.1 | termite gut homogenate clone Rs-C76 bacterium                                  |
| Firmicutes | Clostridiaceae          | sf_12 | 4475 | AB089035.1 | termite gut homogenate clone Rs-N02 bacterium                                  |
| Firmicutes | Bacillaceae             | sf_1  | 3827 | AF547209.1 | Bacillus acidogenensis str. 105-2                                              |
| Firmicutes | Bacillaceae             | sf_1  | 3328 | AJ224963.1 | Pseudobacillus caroliniae                                                      |
| Firmicutes | Alicyclobacillaceae     | sf_1  | 3368 | AY529492.1 | geothermal site isolate str. G1                                                |
| Firmicutes | Peptostreptococcaceae   | sf_5  | 3182 | AB088970.1 | termite gut homogenate clone Rs-Q64 bacterium                                  |

|            |                         |       |      |            |                                                                                |
|------------|-------------------------|-------|------|------------|--------------------------------------------------------------------------------|
| Firmicutes | Unclassified            | sf_8  | 546  | AF282254.1 | Ferribacter thermoautotrophicus                                                |
| Firmicutes | Unclassified            | sf_8  | 2433 | AF282252.1 | Ferribacter thermoautotrophicus str. JW/JH-Fiji-2                              |
| Firmicutes | Peptococc/Acidaminococc | sf_11 | 863  | AY162469.1 | Dialister invisus str. E7_25                                                   |
| Firmicutes | Peptococc/Acidaminococc | sf_11 | 39   | AF523919.1 | forested wetland clone RCP2-71                                                 |
| Firmicutes | Lachnospiraceae         | sf_5  | 2961 | AB088989.1 | termite gut homogenate clone Rs-F92 bacterium                                  |
| Firmicutes | Lachnospiraceae         | sf_5  | 3036 | AB088990.1 | termite gut homogenate clone Rs-F27 bacterium                                  |
| Firmicutes | Lachnospiraceae         | sf_5  | 2834 | U41168.1   | Butyrivibrio fibrisolvens str. OB156                                           |
| Firmicutes | Peptostreptococcaceae   | sf_5  | 2679 | AB062845.1 | termite gut homogenate clone BCf9-13                                           |
| Firmicutes | Peptostreptococcaceae   | sf_5  | 3080 | AB088986.1 | termite gut homogenate clone Rs-F43 bacterium                                  |
| Firmicutes | Peptostreptococcaceae   | sf_5  | 2797 | AY167963.1 | Isolation and identification hyper-ammonia producing swine storage pits manure |
| Firmicutes | Bacillaceae             | sf_1  | 3612 | AB042060.1 | Bacillus schlegelii str. ATCC 43741T                                           |
| Firmicutes | Bacillaceae             | sf_1  | 3836 | AY682096.1 | Geobacillus stearothermophilus str. 46                                         |
| Firmicutes | Halobacillaceae         | sf_1  | 3344 | AY881246.1 | Halobacillus yeomjeoni str. MSS-402                                            |
| Firmicutes | Bacillaceae             | sf_1  | 3439 | AF071856.1 | Bacillus sibiralis str. 171544                                                 |
| Firmicutes | Bacillaceae             | sf_1  | 1050 | AJ717384.1 | Bacillus firmus CV93b                                                          |
| Firmicutes | Bacillaceae             | sf_1  | 3579 | AB020198.1 | Bacillus sp. str. TGS750                                                       |
| Firmicutes | Bacillaceae             | sf_1  | 3675 | AY189750.1 | Bacillus mojavenensis str. M-1                                                 |
| Firmicutes | Bacillaceae             | sf_1  | 3706 | AF302119.1 | Bacillus sonorensis str. NRRL B-23155                                          |
| Firmicutes | Bacillaceae             | sf_1  | 3831 | AY030328.1 | Bacillus licheniformis str. KL-068                                             |
| Firmicutes | Bacillaceae             | sf_1  | 3909 | D26185.1   | Bacillus subtilis subsp. Marburg str. 168                                      |
| Firmicutes | Staphylococcaceae       | sf_1  | 3258 | D83358.1   | Staphylococcus auricularis str. MAFF911484 ATCC33753T                          |
| Firmicutes | Staphylococcaceae       | sf_1  | 3284 |            |                                                                                |
| Firmicutes | Staphylococcaceae       | sf_1  | 3545 |            |                                                                                |
| Firmicutes | Staphylococcaceae       | sf_1  | 3569 | L37596.1   | Staphylococcus saprophyticus                                                   |
| Firmicutes | Staphylococcaceae       | sf_1  | 3592 | Y12593.1   | Staphylococcus caprae str. DSM 20608                                           |
| Firmicutes | Staphylococcaceae       | sf_1  | 3605 |            |                                                                                |
| Firmicutes | Staphylococcaceae       | sf_1  | 3628 | X66100.1   | Staphylococcus haemolyticus str. CCM2737                                       |
| Firmicutes | Staphylococcaceae       | sf_1  | 3638 | X86641.1   | Staphylococcus sp str. AG-30                                                   |
| Firmicutes | Staphylococcaceae       | sf_1  | 3654 | AF322002.1 | Staphylococcus pettenkoferi str. B3117                                         |
| Firmicutes | Staphylococcaceae       | sf_1  | 3684 | S83569.1   | Staphylococcus sciuri                                                          |
| Firmicutes | Staphylococcaceae       | sf_1  | 3794 |            |                                                                                |
| Firmicutes | Staphylococcaceae       | sf_1  | 3822 | AJ320272.1 | Staphylococcus succinus str. SB72                                              |
| Firmicutes | Staphylococcaceae       | sf_1  | 3494 | AB079788.1 | Micrococcus luteus B-P 26                                                      |
| Firmicutes | Staphylococcaceae       | sf_1  | 3432 | AY188939.1 | deep-sea sediment isolate str. P_wp0225                                        |
| Firmicutes | Caryophanaceae          | sf_1  | 3285 | AJ491302.1 | Caryophanon latum str. DSM 14151                                               |
| Firmicutes | Lactobacillaceae        | sf_1  | 3634 | AJ417738.1 | Lactobacillus letivazi str. JCL3994                                            |
| Firmicutes | Lactobacillaceae        | sf_1  | 3767 | AJ575744.1 | Lactobacillus suebicus str. CECT 5917T                                         |
| Firmicutes | Enterococcaceae         | sf_1  | 3261 | AJ301836.1 | Enterococcus mundtii str. LMG 10748                                            |
| Firmicutes | Enterococcaceae         | sf_1  | 3298 | AJ301839.1 | Enterococcus saccharolyticus str. LMG 11427                                    |
| Firmicutes | Enterococcaceae         | sf_1  | 3392 | Y17152.2   | Vagococcus lutrae str. m1134/97/1; CCUG 39187                                  |
| Firmicutes | Streptococcaceae        | sf_1  | 3250 | AF396920.1 | Streptococcus bovis str. B315                                                  |
| Firmicutes | Streptococcaceae        | sf_1  | 3253 | AF349918.1 | derived cheese sample clone 32CR                                               |
| Firmicutes | Streptococcaceae        | sf_1  | 3313 | AY188352.1 | Streptococcus salivarius str. ATCC 7073                                        |
| Firmicutes | Streptococcaceae        | sf_1  | 3397 | Z94012.1   | Streptococcus macedonicus str. ACA-DC 206 LAB617                               |
| Firmicutes | Streptococcaceae        | sf_1  | 3906 | AF104114.1 | Streptococcus bovis str. ATCC 43143                                            |
| Firmicutes | Streptococcaceae        | sf_1  | 3446 | AY173079.1 | Streptococcus bovis str. HJ50                                                  |
| Firmicutes | Streptococcaceae        | sf_1  | 3753 | AF009482.1 | Streptococcus suis str. 8074                                                   |
| Firmicutes | Streptococcaceae        | sf_1  | 3251 | AY188347.1 | Streptococcus cristatus str. ATCC 51100                                        |
| Firmicutes | Streptococcaceae        | sf_1  | 3287 | AF432137.1 | tongue dorsum scrapings clone FP015                                            |
| Firmicutes | Streptococcaceae        | sf_1  | 3290 | AY518677.1 | Streptococcus mitis str. Sm91                                                  |

|            |                         |       |      |             |                                                        |
|------------|-------------------------|-------|------|-------------|--------------------------------------------------------|
| Firmicutes | Clostridiaceae          | sf_12 | 4278 | AF482434.1  | granular sludge clone R1p16                            |
| Firmicutes | Clostridiaceae          | sf_12 | 4310 | AB100478.1  | termite gut clone Rs-056                               |
| Firmicutes | Clostridiaceae          | sf_12 | 4584 | X71852.1    | Clostridium papyrosolvens str. DSM 2782                |
| Firmicutes | Clostridiaceae          | sf_12 | 4272 | AB088965.1  | termite gut homogenate clone Rs-M34 bacterium          |
| Firmicutes | Clostridiaceae          | sf_12 | 4369 | AB089032.1  | termite gut homogenate clone Rs-N73 bacterium          |
| Firmicutes | Lachnospiraceae         | sf_5  | 4511 | AF376218.1  | ckncm314-B7-17 clone                                   |
| Firmicutes | Lachnospiraceae         | sf_5  | 4514 | AB088983.2  | termite gut homogenate clone Rs-B34 bacterium          |
| Firmicutes | Lachnospiraceae         | sf_5  | 4533 | AB088980.1  | termite gut homogenate clone Rs-N06 bacterium          |
| Firmicutes | Clostridiaceae          | sf_12 | 4566 | AF371796.1  | swine intestine clone p-2657-65A5                      |
| Firmicutes | Lachnospiraceae         | sf_5  | 4567 | AJ408989.1  | human colonic clone HuCB5                              |
| Firmicutes | Clostridiaceae          | sf_12 | 4306 | AY261814.1  | UASB reactor granular sludge clone PD-UASB-4 bacterium |
| Firmicutes | Lachnospiraceae         | sf_5  | 4525 | AB088991.1  | termite gut homogenate clone Rs-Q18 bacterium          |
| Firmicutes | Lactobacillaceae        | sf_1  | 3566 | X76329.1    | Lactobacillus pontis str. LTH 2587                     |
| Firmicutes | Aerococcaceae           | sf_1  | 3833 | L08623.1    | Carnobacterium alterfunditum                           |
| Firmicutes | Clostridiaceae          | sf_12 | 4297 |             |                                                        |
| Firmicutes | Clostridiaceae          | sf_12 | 4614 | AB093546.1  | Clostridium sp. str. JC3                               |
| Firmicutes | Lachnospiraceae         | sf_5  | 4212 | AB100488.1  | termite gut clone Rs-061                               |
| Firmicutes | Lachnospiraceae         | sf_5  | 4315 | AB089040.1  | termite gut homogenate clone Rs-N94 bacterium          |
| Firmicutes | Lachnospiraceae         | sf_5  | 4535 | AF376201.1  | ckncm297-B1-1 clone                                    |
| Firmicutes | Peptococc/Acidaminococc | sf_11 | 304  | AB003379.1  | Selenomonas ruminantium str. JCM6582                   |
| Firmicutes | Peptococc/Acidaminococc | sf_11 | 710  | AF458222.1  | Centipeda periodontii str. HB-2                        |
| Firmicutes | Peptococc/Acidaminococc | sf_11 | 940  | X84006.1    | Veillonella dispar str. DSM 20735                      |
| Firmicutes | Peptococc/Acidaminococc | sf_11 | 428  | AJ488090.1  | chlorobenzene-degrading consortium clone IIIA-1        |
| Firmicutes | Peptococc/Acidaminococc | sf_11 | 242  | AJ493052.1  | Desulfosporosinus orientis str. DSMZ 7493              |
| Firmicutes | Lachnospiraceae         | sf_5  | 2698 | AB088950.1  | termite gut homogenate clone Rs-B88 bacterium          |
| Firmicutes | Lachnospiraceae         | sf_5  | 3076 | AY169415.1  | Clostridium nexile                                     |
| Firmicutes | Lachnospiraceae         | sf_5  | 2825 | AF105403.1  | Butyrivibrio fibrisolvens str. LP1265                  |
| Firmicutes | Lachnospiraceae         | sf_5  | 2844 | AF202260.1  | Pseudobutyrvibrio ruminis str. pC-XS2                  |
| Firmicutes | Lachnospiraceae         | sf_5  | 3059 | X89978.1    | Butyrivibrio fibrisolvens str. NCDO 2249               |
| Firmicutes | Lachnospiraceae         | sf_5  | 3038 | AF371648.1  | swine intestine clone p-1594-c5                        |
| Firmicutes | Peptostreptococcaceae   | sf_5  | 2729 | AJ306754.1  | DCP-dechlorinating consortium clone SHA-58             |
| Firmicutes | Peptostreptococcaceae   | sf_5  | 2993 | AF538856.1  | oral clone P2PB_46 P3                                  |
| Firmicutes | Clostridiaceae          | sf_12 | 3021 | AF458779.1  | Clostridium caminithermale str. DVird3                 |
| Firmicutes | Clostridiaceae          | sf_12 | 3077 | X76750.1    | Clostridium glycolicum str. DSM 1288                   |
| Firmicutes | Paenibacillaceae        | sf_1  | 3299 | AF378230.1  | Brevibacillus borstelensis str. LMG 15536              |
| Firmicutes | Bacillaceae             | sf_1  | 3492 | AB042061.1  | Bacillus subtilis str. IAM 12118T                      |
| Firmicutes | Bacillaceae             | sf_1  | 3900 | X68416.1    | Bacillus licheniformis str. DSM 13                     |
| Firmicutes | Bacillaceae             | sf_1  | 3918 | AF549498.1  | Bacillus subtilis                                      |
| Firmicutes | Lactobacillaceae        | sf_1  | 3418 | AB001836.2  | Lactobacillus subsp. aviarius                          |
| Firmicutes | Lactobacillaceae        | sf_1  | 3703 | AY389803.1  | Lactobacillus salivarius str. RA2115                   |
| Firmicutes | Enterococcaceae         | sf_1  | 3318 | AF539705.1  | Enterococcus ratti str. ATCC 700914                    |
| Firmicutes | Enterococcaceae         | sf_1  | 3382 |             |                                                        |
| Firmicutes | Enterococcaceae         | sf_1  | 3713 | AF061009.1  | Enterococcus cecorum str. ATCC43198                    |
| Firmicutes | Streptococcaceae        | sf_1  | 3722 | NC_002662.1 | Lactococcus I11403 subsp. lactis str. IL1403           |
| Firmicutes | Unclassified            | sf_1  | 3481 |             |                                                        |
| Firmicutes | Streptococcaceae        | sf_1  | 3588 | AY188350.1  | Streptococcus downei str. ATCC 33748                   |
| Firmicutes | Streptococcaceae        | sf_1  | 3629 | AF139600.1  | Streptococcus mutans str. UA96                         |
| Firmicutes | Clostridiaceae          | sf_12 | 4622 | AB100475.1  | termite gut clone Rs-L36                               |
| Firmicutes | Lachnospiraceae         | sf_5  | 4281 | AF332721.1  | granular sludge clone UASB_brew_B86                    |
| Firmicutes | Unclassified            | sf_17 | 4307 |             |                                                        |
| Firmicutes | Lachnospiraceae         | sf_5  | 4331 | AF332720.1  | granular sludge clone UASB_brew_B84                    |
| Firmicutes | Clostridiaceae          | sf_12 | 4357 | AF550610.1  | Lachnospiraceae bacterium 19gly4                       |

|            |                         |       |      |            |                                                              |
|------------|-------------------------|-------|------|------------|--------------------------------------------------------------|
| Firmicutes | Clostridiaceae          | sf_12 | 4415 | AB089041.1 | termite gut homogenate clone Rs-K32 bacterium                |
| Firmicutes | Lachnospiraceae         | sf_5  | 4512 | AF332711.1 | granular sludge clone UASB_brew_B25                          |
| Firmicutes | Clostridiaceae          | sf_12 | 4524 | AB100476.1 | termite gut clone Rs-093                                     |
| Firmicutes | Clostridiaceae          | sf_12 | 4169 |            |                                                              |
| Firmicutes | Clostridiaceae          | sf_12 | 2915 | AY158079.1 | Tepidibacter thalassicus str. SC 562                         |
| Firmicutes | Peptococc/Acidaminococc | sf_11 | 534  | AJ488084.1 | chlorobenzene-degrading consortium clone IIA-26              |
| Firmicutes | Bacillaceae             | sf_1  | 3283 | AB021194.1 | Bacillus niacini str. IFO15566                               |
| Firmicutes | Clostridiaceae          | sf_12 | 4156 | AF407388.1 | MCB-contaminated groundwater-treating reactor clone RA9C1    |
| Firmicutes | Lachnospiraceae         | sf_5  | 4434 | AB089036.1 | termite gut homogenate clone Rs-K11 bacterium                |
| Firmicutes | Clostridiaceae          | sf_12 | 4229 |            |                                                              |
| Firmicutes | Unclassified            | sf_3  | 2373 |            |                                                              |
| Firmicutes | Peptococc/Acidaminococc | sf_11 | 181  | AF548373.1 | Allisonella histaminiformans str. MR2                        |
| Firmicutes | Peptococc/Acidaminococc | sf_11 | 59   | AF371694.1 | swine intestine clone p-1941-s962-3                          |
| Firmicutes | Peptococc/Acidaminococc | sf_11 | 862  | AF473834.1 | Megasphaera micronuciformis str. AIP 412.00; CIP 107280      |
| Firmicutes | Lachnospiraceae         | sf_5  | 2804 | AY353957.1 | Clostridium amygdalinum str. BR-10                           |
| Firmicutes | Lachnospiraceae         | sf_5  | 3042 | AF371584.1 | swine intestine clone p-2876-6C5                             |
| Firmicutes | Lachnospiraceae         | sf_5  | 3111 | AB034059.1 | rumen clone 6C3d-11                                          |
| Firmicutes | Lachnospiraceae         | sf_5  | 2991 | AB034063.1 | rumen clone 3C3d-8                                           |
| Firmicutes | Lachnospiraceae         | sf_5  | 3171 | AY169414.1 | Lachnospira pectinoschiza                                    |
| Firmicutes | Lachnospiraceae         | sf_5  | 2681 | AB088974.1 | termite gut homogenate clone Rs-K41 bacterium                |
| Firmicutes | Bacillaceae             | sf_1  | 3661 | AB094471.1 | Bacillus sp. str. 2216.25.2                                  |
| Firmicutes | Thermoactinomycetaceae  | sf_1  | 3301 | AB088361.1 | Thermoactinomyces sp. str. 700375                            |
| Firmicutes | Bacillaceae             | sf_1  | 3763 | AY672761.1 | Geobacillus stearothermophilus                               |
| Firmicutes | Bacillaceae             | sf_1  | 3345 | AY548955.1 | Bacillus pumilus str. S9                                     |
| Firmicutes | Staphylococcaceae       | sf_1  | 3524 | L14326.1   | Gemella haemolysans                                          |
| Firmicutes | Lactobacillaceae        | sf_1  | 3330 | AB107637.1 | Lactobacillus kitasatonis str. KM9212                        |
| Firmicutes | Lactobacillaceae        | sf_1  | 3521 | AJ271383.1 | Pediococcus inopinatus str. DSM 20285                        |
| Firmicutes | Lactobacillaceae        | sf_1  | 3526 | AF401673.1 | Lactobacillus sakei                                          |
| Firmicutes | Carnobacteriaceae       | sf_1  | 3536 |            |                                                              |
| Firmicutes | Aerococcaceae           | sf_1  | 3553 | Y17300.1   | Desemzia incerta str. DSM 20581                              |
| Firmicutes | Unclassified            | sf_1  | 3289 | AJ302648.1 | Isobaculum melis CCUG 37660T                                 |
| Firmicutes | Streptococcaceae        | sf_1  | 3869 | AB104843.1 | Streptococcus equi subsp. zoepidemicus str. Tokyo1291 subsp. |
| Firmicutes | Acholeplasmataceae      | sf_1  | 4044 |            |                                                              |
| Firmicutes | Clostridiaceae          | sf_12 | 4157 | AB089043.1 | termite gut homogenate clone Rs-A15 bacterium                |
| Firmicutes | Clostridiaceae          | sf_12 | 4225 | AB100486.1 | termite gut clone Rs-116                                     |
| Firmicutes | Clostridiaceae          | sf_12 | 4418 | AB088966.2 | termite gut homogenate clone Rs-H18 bacterium                |
| Firmicutes | Clostridiaceae          | sf_12 | 4507 | AB088984.1 | termite gut homogenate clone Rs-N21 bacterium                |
| Firmicutes | Paenibacillaceae        | sf_1  | 3641 | AJ313027.1 | Brevibacillus sp. MN 47.2a                                   |
| Firmicutes | Bacillaceae             | sf_1  | 283  | Z26926.1   | Geobacillus thermocatenulatus str. DSM 730                   |
| Firmicutes | Bacillaceae             | sf_1  | 3424 | AJ532701.1 | uranium mill tailings clone Gitt-KF-76                       |
| Firmicutes | Bacillaceae             | sf_1  | 3926 | X92160.1   | Lake Bogoria isolate 64B4                                    |
| Firmicutes | Lachnospiraceae         | sf_5  | 3066 | AF067965.1 | Clostridium methoxybenzovorans str. SR3; DSM 12182           |
| Firmicutes | Lachnospiraceae         | sf_5  | 3088 | X73449.1   | Clostridium sphenoides str. DSM 632                          |
| Firmicutes | Lachnospiraceae         | sf_5  | 2937 | AF371541.1 | swine intestine clone p-2482-18B5                            |
| Firmicutes | Lachnospiraceae         | sf_5  | 3089 | AY169419.1 | Ruminococcus obeum                                           |
| Firmicutes | Lachnospiraceae         | sf_5  | 3017 | AB088993.1 | termite gut homogenate clone Rs-D48 bacterium                |
| Firmicutes | Paenibacillaceae        | sf_1  | 3415 | AF480937.1 | Paenibacillus nematophilus str. NEM1b                        |
| Firmicutes | Bacillaceae             | sf_1  | 305  | M77488.1   | Bacillus thermoleovorans                                     |
| Firmicutes | Bacillaceae             | sf_1  | 829  | AY191842.1 | Geobacillus sp. str. YMTC1049                                |

|            |                         |       |      |            |                                                                            |
|------------|-------------------------|-------|------|------------|----------------------------------------------------------------------------|
| Firmicutes | Bacillaceae             | sf_1  | 3550 | AF142677.4 | Bacillus megaterium str. QM B1551                                          |
| Firmicutes | Clostridiaceae          | sf_12 | 4187 | AF538854.1 | Clostridiales oral clone P4PB_122 P3                                       |
| Firmicutes | Clostridiaceae          | sf_12 | 4180 | AB089028.1 | termite gut homogenate clone Rs-M23 bacterium                              |
| Firmicutes | Clostridiaceae          | sf_12 | 4555 | M59113.1   | Clostridium tyrobutyricum                                                  |
| Firmicutes | Clostridiaceae          | sf_12 | 4551 | X78070.1   | Clostridium acetobutylicum str. ATCC 824 (T)                               |
| Firmicutes | Unclassified            | sf_1  | 4298 | AY207065.1 | human mouth clone P4PA_66                                                  |
| Firmicutes | Peptostreptococcaceae   | sf_5  | 619  | AY217429.1 | TCE-dechlorinating microbial community clone 1G                            |
| Firmicutes | Peptostreptococcaceae   | sf_5  | 1037 | AY169425.1 | Finegoldia magna                                                           |
| Firmicutes | Peptostreptococcaceae   | sf_5  | 616  | AF542230.1 | Peptoniphilus lacrimalis str. CCUG 31350                                   |
| Firmicutes | Bacillaceae             | sf_1  | 3650 |            |                                                                            |
| Firmicutes | Peptostreptococcaceae   | sf_5  | 2721 | AB088971.1 | termite gut homogenate clone Rs-N71 bacterium                              |
| Firmicutes | Halobacillaceae         | sf_1  | 3552 | AB087828.1 | Paraliobacillus ryukyensis                                                 |
| Firmicutes | Bacillaceae             | sf_1  | 3489 | AY167818.1 | Bacillus silvestris str. SAFN-010                                          |
| Firmicutes | Clostridiaceae          | sf_12 | 4339 | U51843.1   | Clostridium chauvoei str. ATCC 10092T                                      |
| Firmicutes | Unclassified            | sf_1  | 2359 | AB091324.1 | UASB granular sludge clone JP                                              |
| Firmicutes | Unclassified            | sf_4  | 2398 | AY093477.1 | deep marine sediment clone MB-C2-106                                       |
| Firmicutes | Peptococc/Acidaminococc | sf_11 | 1036 | AF407698.1 | Great Artesian Basin clone G07                                             |
| Firmicutes | Lachnospiraceae         | sf_5  | 2784 | AJ408993.1 | human colonic clone HuCB12                                                 |
| Firmicutes | Lachnospiraceae         | sf_5  | 3109 | X87151.1   | Catonella morbi str. ATCC 51271                                            |
| Firmicutes | Eubacteriaceae          | sf_1  | 28   | AB088988.1 | termite gut homogenate clone Rs-H81 bacterium                              |
| Firmicutes | Paenibacillaceae        | sf_1  | 3559 | AF378696.1 | Paenibacillus turicensis str. MOL722                                       |
| Firmicutes | Bacillaceae             | sf_1  | 385  | X57309.1   | Geobacillus stearothermophilus str. T10                                    |
| Firmicutes | Bacillaceae             | sf_1  | 462  | Z26927.1   | Geobacillus thermodenitrificans str. DSM 466                               |
| Firmicutes | Bacillaceae             | sf_1  | 571  | Z26922.1   | Bacillus caldolenax str. DSM 406                                           |
| Firmicutes | Halobacillaceae         | sf_1  | 3769 | AY121437.1 | Gracilibacillus sp. str. YIM-kkny13                                        |
| Firmicutes | Aerococcaceae           | sf_1  | 3870 | AB022027.1 | Abiotrophia para-adiacens str. TKT1                                        |
| Firmicutes | Lactobacillaceae        | sf_1  | 3696 | AY253657.1 | Lactobacillus kalixensis str. Kx127A2; LMG 22115T; DSM 16043T; CCUG 48459T |
| Firmicutes | Lactobacillaceae        | sf_1  | 3885 | M58834.1   | Pediococcus pentosaceus                                                    |
| Firmicutes | Unclassified            | sf_6  | 149  | M23730.1   | Streptococcus pleomorphus                                                  |
| Firmicutes | Unclassified            | sf_1  | 4261 | AB089006.1 | termite gut homogenate clone Rs-G04 bacterium                              |
| Firmicutes | Lachnospiraceae         | sf_5  | 4539 | AB089046.1 | termite gut homogenate clone Rs-C61 bacterium                              |
| Firmicutes | Lachnospiraceae         | sf_5  | 4623 | AJ408957.1 | human colonic clone HuCA1                                                  |
| Firmicutes | Unclassified            | sf_4  | 4526 | AY133082.1 | TCE-contaminated site clone ccsIm210                                       |
| Firmicutes | Syntrophomonadaceae     | sf_5  | 2456 | AF482440.1 | granular sludge clone R4b14                                                |
| Firmicutes | Unclassified            | sf_4  | 2716 | AB089010.1 | termite gut homogenate clone Rs-F76 bacterium                              |
| Firmicutes | Halobacillaceae         | sf_1  | 3756 | AY121439.1 | Salibacillus sp. str. YIM-kkny16                                           |
| Firmicutes | Bacillaceae             | sf_1  | 3517 | AF500007.1 | Planococcus maritimus str. TF-9                                            |
| Firmicutes | Clostridiaceae          | sf_12 | 4598 | AB161372.1 | Clostridium sardiniense str. DSM 600                                       |
| Firmicutes | Peptococc/Acidaminococc | sf_11 | 392  | AF481210.1 | oral endodontic infection clone MCE7_134                                   |
| Firmicutes | Unclassified            | sf_17 | 926  |            |                                                                            |
| Firmicutes | Lachnospiraceae         | sf_5  | 3152 | AF385510.1 | tongue dorsa clone D0016                                                   |
| Firmicutes | Lachnospiraceae         | sf_5  | 2709 | AY916314.1 | human stool clone B065                                                     |
| Firmicutes | Lachnospiraceae         | sf_5  | 3001 | AJ408972.1 | human colonic clone HuCA20                                                 |
| Firmicutes | Peptostreptococcaceae   | sf_5  | 2796 | AF287764.1 | human subgingival plaque clone BB142                                       |
| Firmicutes | Bacillaceae             | sf_1  | 234  | AJ293805.1 | Bacillus vulcani str. 3S-1                                                 |
| Firmicutes | Bacillaceae             | sf_1  | 3460 | AY312404.1 | Geobacillus jurassicus str. DS1                                            |
| Firmicutes | Bacillaceae             | sf_1  | 3540 | AB034836.1 | Geobacillus thermoleovorans str. B23                                       |
| Firmicutes | Bacillaceae             | sf_1  | 3589 | AF519468.1 | Bacillus senegalensis str. RS8; CIP 106 669                                |
| Firmicutes | Aerococcaceae           | sf_1  | 3736 | Y14650.1   | Desemzia incerta str. DSM 20581                                            |
| Firmicutes | Streptococcaceae        | sf_1  | 3907 | U87830.1   | aortic heart valve patient with endocarditis clone v6                      |
| Firmicutes | Clostridiaceae          | sf_12 | 4265 | AB088969.1 | termite gut homogenate clone Rs-N70 bacterium                              |
| Firmicutes | Clostridiaceae          | sf_12 | 4589 | X68176.1   | Clostridium butyricum str. ATCC43755                                       |

|            |                         |       |      |            |                                                                     |
|------------|-------------------------|-------|------|------------|---------------------------------------------------------------------|
| Firmicutes | Lactobacillaceae        | sf_1  | 3768 | Y19167.1   | Lactobacillus perolens str. L532                                    |
| Firmicutes | Clostridiaceae          | sf_12 | 4359 | AB089047.1 | termite gut homogenate clone Rs-C69 bacterium                       |
| Firmicutes | Thermoactinomycetaceae  | sf_1  | 3539 | AF138738.1 | Laceyella sacchari str. KCTC 9789 ()                                |
| Firmicutes | Sporolactobacillaceae   | sf_1  | 3879 | X92161.1   | Lake Elmenteita isolate WE4                                         |
| Firmicutes | Erysipelotrichaceae     | sf_3  | 144  | L34616.1   | Eubacterium cylindroides                                            |
| Firmicutes | Peptococc/Acidaminococc | sf_11 | 126  | AY134907.1 | oral periodontitis clone FY011                                      |
| Firmicutes | Peptococc/Acidaminococc | sf_11 | 771  | X82500.1   | Dialister pneumosintes str. ATCC 33048                              |
| Firmicutes | Clostridiaceae          | sf_12 | 3049 | Z69929.1   | Clostridium paradoxum str. DSM 7308T                                |
| Firmicutes | Clostridiaceae          | sf_12 | 3108 | Z69940.1   | Clostridium paradoxum str. DSM 7308T                                |
| Firmicutes | Paenibacillaceae        | sf_1  | 3651 | AJ011323.1 | Paenibacillus borealis KK20                                         |
| Firmicutes | Bacillaceae             | sf_1  | 3688 | AY167821.1 | Bacillus sp. str. SAFN-006                                          |
| Firmicutes | Bacillaceae             | sf_1  | 3894 | AJ514408.1 | Sporosarcina macmurdoensis str. CMS 21w                             |
| Firmicutes | Bacillaceae             | sf_1  | 3383 |            |                                                                     |
| Firmicutes | Lactobacillaceae        | sf_1  | 3366 | AY255802.1 | Lactobacillus saerimneri str. GDA154 LMG 22087                      |
| Firmicutes | Enterococcaceae         | sf_1  | 3680 | X75752.1   | DSM 16049 (T); CCUG 48462 (T)                                       |
| Firmicutes | Clostridiaceae          | sf_12 | 4607 | X68188.1   | Melissococcus plutonius str. NCDO 2440                              |
| Firmicutes | Clostridiaceae          | sf_12 | 4427 | L08062.1   | Clostridium novyi str. NCTC538                                      |
| Firmicutes | Clostridiaceae          | sf_12 | 4610 | AF127024.1 | Clostridium tyrobutyricum str. NIZO 51                              |
| Firmicutes | Peptostreptococcaceae   | sf_5  | 3112 | CR933145.1 | Clostridium putrefaciens str. DSM 1291                              |
| Firmicutes | Bacillaceae             | sf_1  | 3419 | AY228462.1 | Evry municipal wastewater treatment plant clone 012C11_B_SD_P15     |
| Firmicutes | Carnobacteriaceae       | sf_1  | 3792 | AF451271.1 | Bacillus algicola str. KMM 3737                                     |
| Firmicutes | Unclassified            | sf_1  | 2541 | AB091328.1 | Carnobacterium sp. str. D35                                         |
| Firmicutes | Lachnospiraceae         | sf_5  | 3236 | AF287770.1 | UASB granular sludge clone UT-2                                     |
| Firmicutes | Lachnospiraceae         | sf_5  | 2801 | AY169412.1 | Firmicutes sp. oral strain str. FTB41                               |
| Firmicutes | Lachnospiraceae         | sf_5  | 3075 | AJ312385.1 | Butyrivibrio fibrisolvens                                           |
| Firmicutes | Lachnospiraceae         | sf_5  | 2693 | AB008552.1 | Roseburia intestinalis str. L1-82                                   |
| Firmicutes | Lachnospiraceae         | sf_5  | 2943 | AF527773.1 | ruminantium str. GA195                                              |
| Firmicutes | Peptostreptococcaceae   | sf_5  | 2710 | AJ306755.1 | human thigh wound isolate str. MDA2477                              |
| Firmicutes | Sporolactobacillaceae   | sf_1  | 3365 | AF454300.1 | DCP-dechlorinating consortium clone SHA-74                          |
| Firmicutes | Acholeplasmataceae      | sf_1  | 4046 | L33735.1   | Bacillus sp. clone ML615J-19                                        |
| Firmicutes | Erysipelotrichaceae     | sf_3  | 4038 | AB031058.1 | Pigeon pea witches'-broom mycoplasma-like organism                  |
| Firmicutes | Clostridiaceae          | sf_12 | 4627 | AB089030.1 | Bulleidia moorei str. JCM 10647 RCA59-77                            |
| Firmicutes | Unclassified            | sf_4  | 4325 | AB088963.1 | termite gut homogenate clone Rs-A13 bacterium                       |
| Firmicutes | Peptostreptococcaceae   | sf_5  | 919  | AF542234.1 | termite gut homogenate clone Rs-K21 bacterium                       |
| Firmicutes | Aerococcaceae           | sf_1  | 3386 | AF317386.1 | Anaerococcus tetradius str. CCUG 46590                              |
| Firmicutes | Lachnospiraceae         | sf_5  | 4335 | AB088952.1 | feedlot manure clone B87                                            |
| Firmicutes | Peptostreptococcaceae   | sf_5  | 17   | AF538859.1 | termite gut homogenate clone Rs-N86 bacterium                       |
| Firmicutes | Lachnospiraceae         | sf_5  | 4273 | AB089044.1 | Peptostreptococcus sp. oral clone P4PA_156 P4 oral                  |
| Firmicutes | Lachnospiraceae         | sf_5  | 2965 | AF481221.1 | termite gut homogenate clone Rs-M14 bacterium                       |
| Firmicutes | Peptostreptococcaceae   | sf_5  | 668  | AY221992.1 | oral endodontic infection clone MCE9_173                            |
| Firmicutes | Sporolactobacillaceae   | sf_1  | 3747 | AB043848.1 | Sedimentibacter sp. str. BRS2                                       |
| Firmicutes | Bacillaceae             | sf_1  | 3848 | AB098576.1 | Bacillus sp. str. C-59-2                                            |
| Firmicutes | Bacillaceae             | sf_1  | 3845 | AF252326.1 | Bacillus sp. str. TUT1007                                           |
| Firmicutes | Leuconostocaceae        | sf_1  | 3497 | AY035892.1 | hot synthetic compost clone pPD15                                   |
| Firmicutes | Lactobacillaceae        | sf_1  | 3490 | AY675248.1 | Weissella koreensis S-5673                                          |
| Firmicutes | Aerococcaceae           | sf_1  | 3504 | AB083413.1 | Lactobacillus suntoryeus str. LH                                    |
| Firmicutes | Acholeplasmataceae      | sf_1  | 3975 | AF302841.1 | Marinilactibacillus psychrotolerans str. O21                        |
| Firmicutes | Acholeplasmataceae      | sf_1  | 3976 |            | Black raspberry witches'-broom phytoplasma str. BRWB witches'-broom |

|            |                         |       |      |            |                                                         |
|------------|-------------------------|-------|------|------------|---------------------------------------------------------|
| Firmicutes | Clostridiaceae          | sf_12 | 4275 | M59087.1   | Clostridium botulinum str. type G                       |
| Firmicutes | Peptostreptococcaceae   | sf_5  | 861  | AY244779.1 | Peptoniphilus sp. str. 2002-2300004                     |
| Firmicutes | Peptostreptococcaceae   | sf_5  | 2913 | AB088960.2 | termite gut homogenate clone Rs-N82 bacterium           |
| Firmicutes | Clostridiaceae          | sf_12 | 3219 | AF407695.1 | Great Artesian Basin clone R82                          |
| Firmicutes | Bacillaceae             | sf_1  | 3898 | AB034710.1 | compost clone 4-28                                      |
| Firmicutes | Peptococc/Acidaminococc | sf_11 | 865  | AF287793.1 | Selenomonas sputigena str. ATCC 35185                   |
| Firmicutes | Unclassified            | sf_17 | 602  |            |                                                         |
| Firmicutes | Peptostreptococcaceae   | sf_5  | 2722 | AB088987.2 | termite gut homogenate clone Rs-E61 bacterium           |
| Firmicutes | Bacillaceae             | sf_1  | 3635 | AJ504797.1 | Bacillus aeolius str. 4-1                               |
| Firmicutes | Halobacillaceae         | sf_1  | 3849 | X94558.1   | Halobacillus litoralis str. SL-4                        |
| Firmicutes | Lactobacillaceae        | sf_1  | 3547 | AJ250074.1 | Lactobacillus frumenti str. TMW 1.666                   |
| Firmicutes | Streptococcaceae        | sf_1  | 3543 |            |                                                         |
| Firmicutes | Streptococcaceae        | sf_1  | 3637 | AF227836.1 | str. 37236                                              |
| Firmicutes | Acholeplasmataceae      | sf_1  | 3961 | L33766.1   | Clover yellow edge mycoplasma-like organism             |
| Firmicutes | Acholeplasmataceae      | sf_1  | 4045 | AY081817.1 | Chinaberry yellows phytoplasma                          |
| Firmicutes | Acholeplasmataceae      | sf_1  | 3945 | AY566302.1 | Ash witches'-broom phytoplasma str. AshWB               |
| Firmicutes | Clostridiaceae          | sf_12 | 4459 | AB100469.1 | termite gut clone Rs-109                                |
| Firmicutes | Clostridiaceae          | sf_12 | 4550 | AF371790.1 | swine intestine clone p-320-a3                          |
| Firmicutes | Clostridiaceae          | sf_12 | 4582 | AF371783.1 | swine intestine clone p-2600-9F5                        |
| Firmicutes | Clostridiaceae          | sf_12 | 4296 | AB081585.1 | Clostridiaceae str. A4d                                 |
| Firmicutes | Clostridiaceae          | sf_12 | 4575 | X68451.1   | Clostridium subterminale str. NCIMB 10746               |
| Firmicutes | Peptostreptococcaceae   | sf_5  | 901  | Y07841.1   | Anaerococcus octavius str. NCTC 9810                    |
| Firmicutes | Aerococcaceae           | sf_1  | 3522 | M58797.1   | Aerococcus viridans                                     |
| Firmicutes | Lactobacillaceae        | sf_1  | 3829 | AJ417500.1 | Lactobacillus paralimentarius str. DSM 13238            |
| Firmicutes | Peptococc/Acidaminococc | sf_11 | 300  | AY214183.1 | benzene-contaminated groundwater clone ZZ12C8           |
| Firmicutes | Unclassified            | sf_1  | 894  | AF351222.1 | coal tar waste-contaminated groundwater clone 36-22 G+C |
| Firmicutes | Lachnospiraceae         | sf_5  | 2893 | AY169411.1 | Ruminococcus obeum                                      |
| Firmicutes | Clostridiaceae          | sf_12 | 2786 | AY007244.1 | Clostridium glycolicum str. CIN5                        |
| Firmicutes | Halobacteroidaceae      | sf_1  | 887  | X89076.1   | Halanaerobacter chitinovorans                           |
| Firmicutes | Bacillaceae             | sf_1  | 3467 | AJ419629.1 | Bacillus luciferensis str. LMG 18422                    |
| Firmicutes | Aerococcaceae           | sf_1  | 3866 | AF349724.1 | Turicibacter sanguinis                                  |
| Firmicutes | Lactobacillaceae        | sf_1  | 3600 | AJ242969.1 | Lactobacillus crispatus str. NCTC 4                     |
| Firmicutes | Entomoplasmataceae      | sf_1  | 4074 | AF371522.1 | swine intestine clone p-2013-s959-5                     |
| Firmicutes | Clostridiaceae          | sf_21 | 4471 | AB100483.1 | termite gut clone Rs-058                                |
| Firmicutes | Clostridiaceae          | sf_12 | 4587 | X68315.1   | Clostridium botulinum str. 468; toxin type C            |
| Firmicutes | Clostridiaceae          | sf_12 | 4378 |            |                                                         |
| Firmicutes | Clostridiaceae          | sf_12 | 4560 | X68180.1   | Clostridium beijerinckii str. NCIMB9362                 |
| Firmicutes | Streptococcaceae        | sf_1  | 3560 | AJ307888.1 | Streptococcus gallinaceus str. CCUG 42692               |
| Firmicutes | Peptococc/Acidaminococc | sf_11 | 150  |            |                                                         |
| Firmicutes | Clostridiaceae          | sf_12 | 252  | AB089014.1 | termite gut homogenate clone Rs-A28 bacterium           |
| Firmicutes | Unclassified            | sf_1  | 522  | AB091327.1 | UASB granular sludge clone UT-1                         |
| Firmicutes | Lachnospiraceae         | sf_5  | 3087 | AY178635.1 | Butyrivibrio hungatei str. Su6                          |
| Firmicutes | Paenibacillaceae        | sf_1  | 3630 |            |                                                         |
| Firmicutes | Paenibacillaceae        | sf_1  | 3922 | AJ320490.1 | Paenibacillus thiaminolyticus str. DSM 7262             |
| Firmicutes | Bacillaceae             | sf_1  | 3730 | AF541965.1 | Bacillus baekryungensis str. SW-93                      |
| Firmicutes | Bacillaceae             | sf_1  | 3370 | AB020195.1 | Bacillus sp. str. TGS437                                |
| Firmicutes | Aerococcaceae           | sf_1  | 3631 | D50541.1   | Abiotrophia defectiva str. GIFU12707 (ATCC49176)        |
| Firmicutes | Leuconostocaceae        | sf_1  | 3573 | AF360736.1 | Leuconostoc ficulneum str. FS-1                         |
| Firmicutes | Aerococcaceae           | sf_1  | 3326 | AF255736.1 | Nostocoida limicola l str. Ben206                       |
| Firmicutes | Streptococcaceae        | sf_1  | 3699 | AE014207.1 | Streptococcus agalactiae str. 2603V/R                   |
| Firmicutes | Acholeplasmataceae      | sf_1  | 3977 | AF495882.1 | Chinaberry yellows phytoplasma str. CbY1                |

|                  |                         |       |       |                   |                                                                                               |
|------------------|-------------------------|-------|-------|-------------------|-----------------------------------------------------------------------------------------------|
| Firmicutes       | Clostridiaceae          | sf_12 | 4299  | AB100466.1        | termite gut clone Rs-L02                                                                      |
| Firmicutes       | Clostridiaceae          | sf_12 | 4406  | AB088977.1        | termite gut homogenate clone Rs-J39 bacterium                                                 |
| Firmicutes       | Clostridiaceae          | sf_12 | 4177  | AF241842.1        | Clostridium subterminale DSM 2636                                                             |
| Firmicutes       | Peptostreptococcaceae   | sf_5  | 840   | Y07839.1          | Peptoniphilus harei str. DSM 10020; SBH432                                                    |
| Firmicutes       | Staphylococcaceae       | sf_1  | 3585  |                   |                                                                                               |
| Firmicutes       | Clostridiaceae          | sf_12 | 10457 | AJ431218.1        | strain isolate str. Dex60-82                                                                  |
| Firmicutes       | Unclassified            | sf_17 | 2432  |                   |                                                                                               |
| Firmicutes       | Syntrophomonadaceae     | sf_5  | 2483  | AF529116.1        | trichloroethene-contaminated site clone FTLM142 bacterium                                     |
| Firmicutes       | Peptococc/Acidaminococc | sf_11 | 761   | AF338413.1        | Anaeroglobus geminatus str. AIP313.00; CIP 106856; CCUG 44773 clone AKS21                     |
| Firmicutes       | Peptococc/Acidaminococc | sf_11 | 275   | AY185322.1        | termite gut homogenate clone Rs-P50 bacterium                                                 |
| Firmicutes       | Clostridiaceae          | sf_12 | 206   | AB089017.1        | Dehalobacter restrictus str. TEA                                                              |
| Firmicutes       | Peptococc/Acidaminococc | sf_11 | 31    | Y10164.1          | oral endodontic infection clone MCE10_265                                                     |
| Firmicutes       | Peptococc/Acidaminococc | sf_11 | 562   | AF481224.1        | Roseburia faecalis str. M6/1                                                                  |
| Firmicutes       | Lachnospiraceae         | sf_5  | 2756  | AY804149.1        | anaerobic digester clone AA02                                                                 |
| Firmicutes       | Lachnospiraceae         | sf_5  | 2708  | AF275914.2        |                                                                                               |
| Firmicutes       | Unclassified            | sf_17 | 2659  |                   |                                                                                               |
| Firmicutes       | Clostridiaceae          | sf_12 | 2764  |                   |                                                                                               |
| Firmicutes       | Peptostreptococcaceae   | sf_5  | 2738  | AB037875.1        | Mogibacterium neglectum str. ATCC 700924 (=P9a-h)                                             |
| Firmicutes       | Peptostreptococcaceae   | sf_5  | 3153  | U13039.1          | infirmitum str. W 1471                                                                        |
| Firmicutes       | Peptostreptococcaceae   | sf_5  | 134   | AF542228.1        | Peptoniphilus asaccharolyticus str. CCUG 9988                                                 |
| Firmicutes       | Bacillaceae             | sf_1  | 3506  | X92159.1          | Lake Nakuru isolate 18N1                                                                      |
| Firmicutes       | Bacillaceae             | sf_1  | 3861  | AJ229201.1        | anoxic bulk soil flooded rice microcosm clone BSV46 clone                                     |
| Firmicutes       | Bacillaceae             | sf_1  | 246   | AJ509006.1        | Bacillus sp. 6160m-C1                                                                         |
| Firmicutes       | Bacillaceae             | sf_1  | 3820  | AY030332.1        | Bacillus subtilis str. KL-120                                                                 |
| Firmicutes       | Aerococcaceae           | sf_1  | 3519  | AF016390.1        | Granulicatella elegans str. DSM 11693; B1333                                                  |
| Firmicutes       | Aerococcaceae           | sf_1  | 3682  | X70907.1          | Dolosigranulum pigrum str. NCFB 2975                                                          |
| Firmicutes       | Aerococcaceae           | sf_1  | 3435  | AF275700.1        | cf. Alkalibacterium sp. isolate str. F1                                                       |
| Firmicutes       | Aerococcaceae           | sf_1  | 3840  | X87150.1          | Trichococcus pasteurii str. KoTa2                                                             |
| Firmicutes       | Acholeplasmataceae      | sf_1  | 3955  | AF521672.1        | Weeping tea tree witches'-broom phytoplasma tree                                              |
| Firmicutes       | Mycoplasmataceae        | sf_1  | 4014  | NC_002771.1       | Mycoplasma pulmonis str. UAB CTIP                                                             |
| Firmicutes       | Lachnospiraceae         | sf_5  | 4501  | AF385563.1        | crevicular epithelial cells clone BU014                                                       |
| Firmicutes       | Lachnospiraceae         | sf_5  | 4155  | AB089039.1        | termite gut homogenate clone Rs-K92 bacterium                                                 |
| Firmicutes       | Lachnospiraceae         | sf_5  | 4164  | AF376226.1        | ckncm322-B3-7 clone                                                                           |
| Firmicutes       | Clostridiaceae          | sf_12 | 4548  | AB089029.1        | termite gut homogenate clone Rs-Q69 bacterium                                                 |
| Firmicutes       | Unclassified            | sf_3  | 4280  |                   |                                                                                               |
| Fusobacteria     | Fusobacteriaceae        | sf_1  | 488   | NZ_AABF02000111.1 | Fusobacterium nucleatum subsp. vincentii str. ATCC 49256                                      |
| Fusobacteria     | Fusobacteriaceae        | sf_3  | 1034  | AJ307982.1        | Ilyobacter tartaricus str. DSM 2382 T                                                         |
| Fusobacteria     | Fusobacteriaceae        | sf_3  | 644   | AJ307981.1        | Ilyobacter polytropus str. DSM 2926 T                                                         |
| Fusobacteria     | Fusobacteriaceae        | sf_3  | 120   | AF432138.1        | tongue dorsum scrapings clone FP036                                                           |
| Fusobacteria     | Fusobacteriaceae        | sf_3  | 558   | AJ344093.1        | Sneathia sanguinegens str. CCUG 41628T                                                        |
| Fusobacteria     | Fusobacteriaceae        | sf_3  | 694   | AF385518.1        | tongue dorsa clone DR011                                                                      |
| Fusobacteria     | Fusobacteriaceae        | sf_3  | 387   | AY029802.1        | Leptotrichia wadeii str. LB16                                                                 |
| Fusobacteria     | Fusobacteriaceae        | sf_3  | 721   | AY207053.1        | human mouth clone P2PB_51                                                                     |
| Gemmatimonadetes | Unclassified            | sf_5  | 9464  | AF432648.1        | lodgepole pine rhizosphere soil British Columbia Ministry Forests Long-Term Soil Productivity |
| Gemmatimonadetes | Unclassified            | sf_5  | 227   | AJ519397.1        | uranium mining waste pile clone JG37-AG-36                                                    |
| Gemmatimonadetes | Unclassified            | sf_5  | 1127  | AJ519396.1        | uranium mining waste pile near Johannegeorgenstadt soil clone JG37-AG-21                      |



|                   |                   |      |       |                |                                                                |
|-------------------|-------------------|------|-------|----------------|----------------------------------------------------------------|
| Gemmatimonadetes  | Unclassified      | sf_5 | 2047  | AF234148.1     | soil clone #0319-7G21                                          |
| Gemmatimonadetes  | Unclassified      | sf_5 | 317   | AY218696.1     | penguin droppings sediments clone KD8-87                       |
| Gemmatimonadetes  | Unclassified      | sf_5 | 10112 | AF432607.1     | forest soil clone NOS7.157WL                                   |
| Gemmatimonadetes  | Unclassified      | sf_5 | 442   | AF507712.1     | forest soil clone S0134                                        |
| Gemmatimonadetes  | Unclassified      | sf_5 | 1565  | AJ532728.1     | uranium mining waste pile clone JG34-KF-418                    |
| LD1PA group       | Unclassified      | sf_1 | 10118 | AY114324.1     | anoxic marine sediment clone LD1-PA38                          |
| Lentisphaerae     | Unclassified      | sf_5 | 10027 | AJ431234.1     | Cytophaga sp. str. Dex80-43                                    |
| Lentisphaerae     | Unclassified      | sf_5 | 10330 | AF507900.1     | Mono lake clone ML635J-58                                      |
| Lentisphaerae     | Unclassified      | sf_5 | 9704  | AJ431235.1     | Cytophaga sp. str. Dex80-64                                    |
| marine group A    | Unclassified      | sf_1 | 6344  | AF382142.1     | bacterioplankton clone ZA3648c                                 |
| marine group A    | Unclassified      | sf_1 | 6408  | AACY01094130.1 | Sargasso Sea                                                   |
| marine group A    | Unclassified      | sf_1 | 6454  | U34043.1       | marine clone SAR406                                            |
| Natronoanaerobium | Unclassified      | sf_1 | 769   | AJ431345.1     | fjord ikaite column clone un-c23                               |
| Natronoanaerobium | Unclassified      | sf_1 | 4377  | AF507888.1     | Mono Lake at depth 35m station 6 July 2000 clone ML635J-65 G+C |
| Natronoanaerobium | Unclassified      | sf_1 | 3570  | AF454298.1     | Bacillus sp. clone ML1228J-1                                   |
| Natronoanaerobium | Unclassified      | sf_1 | 2437  | AF507879.2     | Mono Lake at depth 23m station 6 July 2000 clone ML623J-19     |
| Natronoanaerobium | Unclassified      | sf_1 | 3745  | AF507877.1     | Mono Lake at depth 35m station 6 July 2000 clone ML635J-45     |
| NC10              | Unclassified      | sf_1 | 10254 | AJ519650.1     | uranium mill tailings soil sample clone Sh765B-TzT-35          |
| NC10              | Unclassified      | sf_1 | 452   | AY177763.1     | vadose clone 5G01                                              |
| NC10              | Unclassified      | sf_1 | 536   | AJ519669.1     | uranium mill tailings clone GuBH2-AD-8                         |
| NC10              | Unclassified      | sf_1 | 2516  | AF529103.1     | TCE-contaminated site clone FTL22                              |
| Nitrospira        | Nitrospiraceae    | sf_1 | 984   | AJ519405.1     | uranium mining waste pile clone JG37-AG-131 sp.                |
| Nitrospira        | Nitrospiraceae    | sf_2 | 697   | AF524003.1     | forested wetland clone FW118                                   |
| Nitrospira        | Nitrospiraceae    | sf_2 | 542   | AF524005.1     | forested wetland clone FW19                                    |
| Nitrospira        | Nitrospiraceae    | sf_1 | 864   | Y14644.1       | nitrifying sludge clone GC86                                   |
| Nitrospira        | Nitrospiraceae    | sf_1 | 179   | AF407702.1     | Great Artesian Basin clone G19                                 |
| Nitrospira        | Nitrospiraceae    | sf_2 | 681   |                |                                                                |
| Nitrospira        | Nitrospiraceae    | sf_2 | 544   | AF524004.1     | forested wetland clone FW5                                     |
| OD1               | Unclassified      | sf_1 | 515   |                |                                                                |
| OP10              | Unclassified      | sf_1 | 326   | AY222300.1     | geothermal clone ST01-SN3H                                     |
| OP10              | Unclassified      | sf_4 | 484   | AF524022.1     | forested wetland clone FW68                                    |
| OP10              | Unclassified      | sf_1 | 514   | AF368184.1     | sludge clone SBRA136                                           |
| OP10              | Unclassified      | sf_5 | 9782  | AY192275.1     | Rocky Mountain alpine soil clone S1a-1H                        |
| OP10              | Unclassified      | sf_1 | 8413  | AJ306784.1     | DCP-dechlorinating consortium clone SHA-37                     |
| OP3               | Unclassified      | sf_4 | 628   | AY050598.1     | CB-contaminated groundwater clone GOUTB15                      |
| OP3               | Unclassified      | sf_2 | 349   | AJ390463.1     | soil clone PBS-25                                              |
| OP3               | Unclassified      | sf_3 | 1015  | AY013695.1     | polluted aquifer clone BVC56                                   |
| OP8               | Unclassified      | sf_3 | 598   | AF419671.1     | Guaymas Basin hydrothermal sediment clone a2b010               |
| OP9/JS1           | Unclassified      | sf_1 | 726   | AF027086.1     | hot spring clone OPB72                                         |
| OP9/JS1           | Unclassified      | sf_1 | 969   | AJ306782.1     | DCP-dechlorinating consortium clone SHA-1                      |
| OP9/JS1           | Unclassified      | sf_1 | 2489  | AY197377.1     | Guaymas Basin hydrothermal vent sediments clone B01R005        |
| OP9/JS1           | Unclassified      | sf_1 | 2491  | AY093469.1     | deep marine sediment clone MB-B2-103                           |
| Planctomycetes    | Pirellulae        | sf_3 | 4670  |                |                                                                |
| Planctomycetes    | Planctomycetaceae | sf_3 | 4948  | BX294756.1     | anoxic basin clone CY0ARA027D01                                |
| Planctomycetes    | Pirellulae        | sf_3 | 4677  | BX294863.1     | aerobic basin clone CY0ARA032A03                               |
| Planctomycetes    | Anammoxales       | sf_4 | 4694  | AF418968.1     | USA: Colorado Fort Collins Horsetooth Reservoir clone HT2F11   |

|                |                     |       |       |            |                                                                                                                |
|----------------|---------------------|-------|-------|------------|----------------------------------------------------------------------------------------------------------------|
| Planctomycetes | Pirellulae          | sf_3  | 4803  | X86388.1   | Pirellula sp. str. ACM 3181                                                                                    |
| Planctomycetes | Planctomycetaceae   | sf_3  | 4831  | AJ231190.1 | Planctomyces brasiliensis                                                                                      |
| Planctomycetes | Anammoxales         | sf_2  | 4683  | BX294785.1 | anoxic basin clone CY0ARA028B09                                                                                |
| Planctomycetes | Planctomycetaceae   | sf_3  | 4652  | BX294789.1 | anoxic basin clone CY0ARA028C04                                                                                |
| Planctomycetes | Anammoxales         | sf_4  | 9662  | AF407728.1 | Great Artesian Basin clone B83                                                                                 |
| Planctomycetes | Unclassified        | sf_1  | 4897  | AY093476.1 | deep marine sediment clone MB-C2-105                                                                           |
| Planctomycetes | Anammoxales         | sf_4  | 4695  | AF316773.1 | Crater Lake clone CL500-15                                                                                     |
| Planctomycetes | Pirellulae          | sf_3  | 4692  | BX294733.1 | aerobic basin clone CY0ARA026G04                                                                               |
| Planctomycetes | Planctomycetaceae   | sf_3  | 4855  | BX294726.1 | aerobic basin clone CY0ARA026D10                                                                               |
| Planctomycetes | Pirellulae          | sf_3  | 4769  | AY114326.1 | anoxic marine sediment clone LD1-PA40                                                                          |
| Proteobacteria | Unclassified        | sf_1  | 7382  | AF355039.1 | marine clone Arctic95C-5                                                                                       |
| Proteobacteria | Unclassified        | sf_3  | 8339  | AY212729.1 | water 5 m downstream manure clone 35ds5                                                                        |
| Proteobacteria | Unclassified        | sf_1  | 9828  | AB089109.1 | termite gut homogenate clone Rs-M89<br>proteobacterium                                                         |
| Proteobacteria | Unclassified        | sf_3  | 9813  | AF420340.1 | hydrothermal sediment clone AF420340                                                                           |
| Proteobacteria | Unclassified        | sf_1  | 10543 | U15103.1   | hydrothermal vent clone PVB_10                                                                                 |
| Proteobacteria | Unclassified        | sf_1  | 10427 | AY672515.1 | hydrothermal vent 9 degrees North East Rise<br>Pacific Ocean clone                                             |
| Proteobacteria | Unclassified        | sf_1  | 10530 | AY672531.1 | CH3_17_BAC_16SrRNA_9N_EPR<br>hydrothermal vent 9 degrees North East Rise<br>Pacific Ocean clone                |
| Proteobacteria | Unclassified        | sf_20 | 2520  |            | CH5_6_BAC_16SrRNA_9N_EPR                                                                                       |
| Proteobacteria | Sphingomonadaceae   | sf_1  | 6663  | AY554010.1 | Sphingopyxis flavimaris str. SW-151                                                                            |
| Proteobacteria | Ralstoniaceae       | sf_1  | 7778  | AJ539233.1 | Ralstonia insidiosa str. CCUG 46388                                                                            |
| Proteobacteria | Pseudomonadaceae    | sf_1  | 9295  |            |                                                                                                                |
| Proteobacteria | Pseudomonadaceae    | sf_1  | 8474  | AJ534672.1 | ground water deep-well injection disposal site<br>radioactive wastes Tomsk-7 clone S15A-MN7<br>proteobacterium |
| Proteobacteria | Pseudomonadaceae    | sf_1  | 9469  | AF290486.1 | cf. Pseudomonas sp. clone Llangefni 52                                                                         |
| Proteobacteria | Polyangiaceae       | sf_3  | 10249 | AJ534629.1 | soil sample uranium mining waste pile near town<br>Johanngeorgenstadt clone JG36-TzT-168<br>proteobacterium    |
| Proteobacteria | Polyangiaceae       | sf_3  | 10298 | AY193162.1 | marine tidal mat clone BTM36                                                                                   |
| Proteobacteria | Polyangiaceae       | sf_3  | 10353 | AF234747.1 | sludge clone A9                                                                                                |
| Proteobacteria | Pasteurellaceae     | sf_1  | 9237  |            |                                                                                                                |
| Proteobacteria | Oxalobacteraceae    | sf_1  | 7845  | AB038368.1 | Diaphorina citri symbiont                                                                                      |
| Proteobacteria | Helicobacteraceae   | sf_3  | 10385 |            |                                                                                                                |
| Proteobacteria | Helicobacteraceae   | sf_3  | 10428 | AF034135.1 | Flexispira rappini FH 9702248                                                                                  |
| Proteobacteria | Helicobacteraceae   | sf_3  | 10430 | AF506783.1 | Helicobacter heilmannii str. MM2                                                                               |
| Proteobacteria | Helicobacteraceae   | sf_3  | 10436 | AF297868.1 | Helicobacter aurati str. MIT 97-5075c                                                                          |
| Proteobacteria | Helicobacteraceae   | sf_3  | 10442 | AF292378.1 | Helicobacter cetorum str. MIT 99-5656                                                                          |
| Proteobacteria | Helicobacteraceae   | sf_3  | 10444 | AB006148.1 | Helicobacter suncus str. Kaz-2                                                                                 |
| Proteobacteria | Helicobacteraceae   | sf_3  | 10448 | U51870.1   | Helicobacter felis str. Dog-1                                                                                  |
| Proteobacteria | Helicobacteraceae   | sf_3  | 10451 | AF506779.1 | Helicobacter heilmannii str. C4S                                                                               |
| Proteobacteria | Helicobacteraceae   | sf_3  | 10454 | L36143.1   | Helicobacter pullorum str. NCTC 12826                                                                          |
| Proteobacteria | Helicobacteraceae   | sf_3  | 10462 | U96297.1   | Helicobacter rodentium str. MIT 96-1312                                                                        |
| Proteobacteria | Helicobacteraceae   | sf_3  | 10548 | AF286052.1 | Helicobacter rappini W.Tee-Bat                                                                                 |
| Proteobacteria | Helicobacteraceae   | sf_3  | 10552 | AF363062.1 | Helicobacter winghamensis str. NLEP 97-1611                                                                    |
| Proteobacteria | Helicobacteraceae   | sf_3  | 10562 | AF286053.1 | Helicobacter rappini W.Tee-Yu                                                                                  |
| Proteobacteria | Desulfovibrionaceae | sf_1  | 10248 | AF418170.1 | Desulfovibrio giganteus str. DSM 4370                                                                          |
| Proteobacteria | Desulfobacteraceae  | sf_5  | 10319 | AY083017.1 | sulfate-reducing habitat clone SLM-CP-116                                                                      |
| Proteobacteria | Desulfoarculaceae   | sf_2  | 10227 | AY193132.1 | marine sediment clone Bol11                                                                                    |

|                |                      |      |       |            |                                                                                    |
|----------------|----------------------|------|-------|------------|------------------------------------------------------------------------------------|
| Proteobacteria | Coxiellaceae         | sf_3 | 8969  | AJ536861.1 | uranium mining waste pile soil sample clone JG30-KF-C15 proteobacterium            |
| Proteobacteria | Campylobacteraceae   | sf_3 | 10538 | L14624.1   | Arcobacter cryaerophilus                                                           |
| Proteobacteria | Campylobacteraceae   | sf_3 | 10447 | Y13671.1   | Sulfurospirillum deleyianum str. Spirillum 5175                                    |
| Proteobacteria | Campylobacteraceae   | sf_3 | 10456 | L06975.1   | Campylobacter showae                                                               |
| Proteobacteria | Alteromonadaceae     | sf_1 | 9324  | AF316891.1 | Pseudoalteromonas rutenica str. KMM300                                             |
| Proteobacteria | Helicobacteraceae    | sf_3 | 10518 | X67854.1   | Helicobacter pylori str. ATCC 49396T                                               |
| Proteobacteria | Helicobacteraceae    | sf_3 | 10520 | AJ249858.1 | Helicobacter sp. blood isolate 964                                                 |
| Proteobacteria | Unclassified         | sf_6 | 7377  | AY192273.1 | Rocky Mountain alpine soil clone W2b-8C                                            |
| Proteobacteria | Unclassified         | sf_1 | 7400  | AF524861.1 | sphagnum peat bog clone K-5b5                                                      |
| Proteobacteria | Unclassified         | sf_1 | 7028  |            |                                                                                    |
| Proteobacteria | Unclassified         | sf_1 | 7123  | AJ518774.1 | uranium mining waste pile near Johanngeorgenstadt soil clone JG37-AG-102           |
| Proteobacteria | Unclassified         | sf_2 | 7188  | AB089085.1 | termite gut homogenate clone Rs-B50 proteobacterium                                |
| Proteobacteria | Unclassified         | sf_4 | 7105  | AB186982.1 | Mariana trough hydrothermal vent water 0.2microm filterable fraction clone MT-NB25 |
| Proteobacteria | Caulobacteraceae     | sf_1 | 6781  | AB023784.1 | Brevundimonas intermedia str. MBIC2712 ATCC15262                                   |
| Proteobacteria | Caulobacteraceae     | sf_1 | 6904  | AB021414.1 | Brevundimonas vesicularis str. IAM 12105T                                          |
| Proteobacteria | Caulobacteraceae     | sf_1 | 6909  | X87274.1   | Brevundimonas diminuta str. DSM 1635                                               |
| Proteobacteria | Caulobacteraceae     | sf_1 | 7359  | AJ227782.1 | Brevundimonas bacterioides str. CB7                                                |
| Proteobacteria | Caulobacteraceae     | sf_1 | 7366  | AJ227784.1 | Brevundimonas subvibrioides str. CB81                                              |
| Proteobacteria | Caulobacteraceae     | sf_1 | 7436  | AJ227797.1 | Brevundimonas sp. str. FWC40                                                       |
| Proteobacteria | Unclassified         | sf_1 | 7156  | AB089097.1 | termite gut homogenate clone Rs-M62 proteobacterium                                |
| Proteobacteria | Anaplasmataceae      | sf_3 | 6908  | M85267.1   | Rhinocyllus conicus endosymbiont                                                   |
| Proteobacteria | Nitrosomonadaceae    | sf_1 | 7789  |            |                                                                                    |
| Proteobacteria | Rhodocyclaceae       | sf_1 | 7956  |            |                                                                                    |
| Proteobacteria | Rhodocyclaceae       | sf_1 | 7907  | AJ315680.1 | Thauera aromatica str. LG356                                                       |
| Proteobacteria | Rhodocyclaceae       | sf_1 | 7925  | Y17591.1   | Thauera selenatis str. ATCC 55363T                                                 |
| Proteobacteria | Unclassified         | sf_3 | 8114  |            |                                                                                    |
| Proteobacteria | Rhodocyclaceae       | sf_1 | 8156  | AY098637.2 | industrial-phenol-degrading community clone MM1 sp.                                |
| Proteobacteria | Rhodocyclaceae       | sf_1 | 7824  | AB089101.1 | termite gut homogenate clone Rs-B77 proteobacterium                                |
| Proteobacteria | Alcaligenaceae       | sf_1 | 7902  | AF155147.1 | Alcaligenes faecalis str. M3A                                                      |
| Proteobacteria | Alcaligenaceae       | sf_1 | 8094  | AF430122.1 | Alcaligenes sp. str. VKM B-2263 dcm6                                               |
| Proteobacteria | Comamonadaceae       | sf_1 | 7965  | X72724.1   | Anoxobacterium dechloraticum                                                       |
| Proteobacteria | Oxalobacteraceae     | sf_1 | 7843  | U54470.1   | Massilia timonae timone                                                            |
| Proteobacteria | Oxalobacteraceae     | sf_1 | 7921  | AY593479.1 | Collimonas fungivorans str. Ter331                                                 |
| Proteobacteria | Oxalobacteraceae     | sf_1 | 8032  | AB074523.1 | Aquaspirillum arcticum str. IAM 14963                                              |
| Proteobacteria | Oxalobacteraceae     | sf_1 | 8034  | Y08845.1   | Janthinobacterium agaricidamnosum str. W1r3T                                       |
| Proteobacteria | Oxalobacteraceae     | sf_1 | 8058  | Y10146.1   | Herbaspirillum seropedicae str. DSM 6445 ATCC 35892                                |
| Proteobacteria | Ralstoniaceae        | sf_1 | 8128  | M32021.1   | Cupriavidus necator                                                                |
| Proteobacteria | Saccharospirillaceae | sf_1 | 8889  | AF452603.1 | hypersaline Mono Lake clone ML110J-5                                               |
| Proteobacteria | Thiotrichaceae       | sf_3 | 8741  | AF532771.1 | marine sediment clone Limfjorden L10                                               |
| Proteobacteria | Thiotrichaceae       | sf_3 | 8752  | AF110276.1 | Beggiatoa sp. str. MS-81-1c                                                        |
| Proteobacteria | Unclassified         | sf_1 | 9418  | AJ518784.1 | uranium mining waste pile clone JG37-AG-14 proteobacterium                         |
| Proteobacteria | Piscirickettsiaceae  | sf_3 | 9291  | AF384373.1 | Methylophaga alcalica str. M39                                                     |
| Proteobacteria | Xanthomonadaceae     | sf_3 | 8689  | AB110496.1 | Dyemona todayi str. XD10                                                           |

|                |                     |      |       |            |                                                                                        |
|----------------|---------------------|------|-------|------------|----------------------------------------------------------------------------------------|
| Proteobacteria | Legionellaceae      | sf_1 | 8865  | AF468229.1 | Arctic pack ice; northern Fram Strait; 80 31.1 N; 01 deg 59.7 min E clone ARKCH2Br2-23 |
| Proteobacteria | Unclassified        | sf_3 | 8587  | AF526927.2 | Mars Odyssey Orbiter and encapsulation facility clone T5-3                             |
| Proteobacteria | Alcanivoraceae      | sf_1 | 8335  | AB055205.1 | Alcanivorax sp. str. K3-3 (MBIC 4323)                                                  |
| Proteobacteria | Moraxellaceae       | sf_3 | 8727  | AY251390.1 | Alkanindiges hongkongensis str. HKU9                                                   |
| Proteobacteria | Pseudomonadaceae    | sf_1 | 9056  | AB037546.1 | Pseudomonas aeruginosa str. #47                                                        |
| Proteobacteria | Pseudomonadaceae    | sf_1 | 9228  | AJ297767.1 | Pseudomonas stutzeri HY-105                                                            |
| Proteobacteria | Pseudomonadaceae    | sf_1 | 9240  | AJ278812.1 | Pseudomonas fluorescens str. CHA0                                                      |
| Proteobacteria | Unclassified        | sf_6 | 8780  | AJ296549.1 | uranium mining mill tailing clone GR-296.II.89 GR-296.II.89                            |
| Proteobacteria | Alteromonadaceae    | sf_1 | 8222  |            |                                                                                        |
| Proteobacteria | Alteromonadaceae    | sf_1 | 8753  | AY553079.1 | Idiomarina loihiensis str. GSP37                                                       |
| Proteobacteria | Alteromonadaceae    | sf_1 | 8970  | AJ295716.1 | Arctic seawater isolate str. R9879                                                     |
| Proteobacteria | Alteromonadaceae    | sf_1 | 8978  | AF468393.1 | Arctic sea ice ARK10108                                                                |
| Proteobacteria | Alteromonadaceae    | sf_1 | 9416  | AF539786.1 | marine isolate str. R8                                                                 |
| Proteobacteria | Pasteurellaceae     | sf_1 | 8409  | AF499896.1 | human colonic mucosal biopsy clone ABLCF1                                              |
| Proteobacteria | Enterobacteriaceae  | sf_1 | 8236  | AF476110.1 | Vryburgia amaryllidis symbiont                                                         |
| Proteobacteria | Enterobacteriaceae  | sf_1 | 8504  | AF476104.1 | Dysmicoccus neobrevipes symbiont                                                       |
| Proteobacteria | Enterobacteriaceae  | sf_1 | 8283  | AF263562.1 | Heteropsylla texana symbiont                                                           |
| Proteobacteria | Desulfohalobiaceae  | sf_1 | 9894  | AF524933.1 | Desulfonauticus submarinus str. 6N                                                     |
| Proteobacteria | Desulfovibrionaceae | sf_1 | 10262 | AF228127.2 | Desulfovibrio sp. str. Ac5.2                                                           |
| Proteobacteria | Desulfovibrionaceae | sf_1 | 9826  | AB089108.2 | termite gut homogenate clone Rs-M72 proteobacterium                                    |
| Proteobacteria | Polyangiaceae       | sf_3 | 9874  | AJ532714.1 | uranium mining waste pile clone JG34-KF-243 proteobacterium                            |
| Proteobacteria | Desulfobacteraceae  | sf_5 | 9875  | AF420354.1 | hydrothermal sediment clone AF420354                                                   |
| Proteobacteria | Unclassified        | sf_9 | 9890  | AB089106.1 | termite gut homogenate clone Rs-K70 proteobacterium                                    |
| Proteobacteria | Helicobacteraceae   | sf_3 | 10432 | AF449246.1 | Riftia pachyptila's tube clone R76-B51                                                 |
| Proteobacteria | Helicobacteraceae   | sf_3 | 10438 | AF154101.1 | hydrocarbon seep clone GCA014                                                          |
| Proteobacteria | Unclassified        | sf_1 | 10475 | AF420359.1 | hydrothermal sediment clone AF420359                                                   |
| Proteobacteria | Unclassified        | sf_1 | 10480 | AJ441204.1 | hydrothermal vent polychaete mucous clone P. palm C 84                                 |
| Proteobacteria | Campylobacteraceae  | sf_3 | 10464 | AY135395.1 | Campylobacter sp. str. NO2B                                                            |
| Proteobacteria | Helicobacteraceae   | sf_3 | 10467 |            |                                                                                        |
| Proteobacteria | Enterobacteriaceae  | sf_1 | 1206  | AY265343.1 | Dermacentor variabilis symbiont                                                        |
| Proteobacteria | Unclassified        | sf_4 | 8855  |            |                                                                                        |
| Proteobacteria | Enterobacteriaceae  | sf_6 | 433   | AF523903.1 | coal effluent wetland clone RCP2-6                                                     |
| Proteobacteria | Enterobacteriaceae  | sf_6 | 646   | AY695840.1 | Opiritatus sp. str. SA-9                                                               |
| Proteobacteria | Alcaligenaceae      | sf_1 | 7838  | AB195161.1 | Alcaligenes defragrans str. PD-19                                                      |
| Proteobacteria | Oxalobacteraceae    | sf_1 | 7878  | AY250094.1 | naphthalene-contaminated sediment clone 29                                             |
| Proteobacteria | Ralstoniaceae       | sf_1 | 8110  | AF085226.1 | Wautersia paucula str. LMG 3413                                                        |
| Proteobacteria | Unclassified        | sf_3 | 8926  | AB099937.1 | inactive deep-sea hydrothermal vent chimneys clone lhcB2-13                            |
| Proteobacteria | Alteromonadaceae    | sf_1 | 9562  | AF513941.1 | Alteromonadaceae clone PH-B55N                                                         |
| Proteobacteria | Desulfobulbaceae    | sf_1 | 9734  | AF449229.1 | Riftia pachyptila's tube clone R103-B13                                                |
| Proteobacteria | Campylobacteraceae  | sf_3 | 10446 |            |                                                                                        |
| Proteobacteria | Caedibacteraceae    | sf_4 | 7157  | AF533506.1 | acid mine drainage clone ASL45                                                         |
| Proteobacteria | Unclassified        | sf_6 | 7575  |            |                                                                                        |
| Proteobacteria | Xanthobacteraceae   | sf_1 | 6660  | D11342.1   | Azorhizobium caulinodans str. ORS 571                                                  |
| Proteobacteria | Unclassified        | sf_2 | 6639  |            |                                                                                        |
| Proteobacteria | Neisseriaceae       | sf_1 | 7945  | AB074518.1 | Aquaspirillum serpens str. IAM 13944                                                   |

|                |                  |      |      |            |                                                                                                                                                                                                                                            |
|----------------|------------------|------|------|------------|--------------------------------------------------------------------------------------------------------------------------------------------------------------------------------------------------------------------------------------------|
| Proteobacteria | Rhodocyclaceae   | sf_1 | 7817 | AY133064.1 | TCE-contaminated site clone ccs265                                                                                                                                                                                                         |
| Proteobacteria | Coxiellaceae     | sf_3 | 7893 | AJ252651.1 | agricultural soil clone SC-I-71                                                                                                                                                                                                            |
| Proteobacteria | Thiotrichaceae   | sf_3 | 9015 | AF110274.1 | Beggiatoa alba str. B18LD; ATCC 33555                                                                                                                                                                                                      |
| Proteobacteria | Thiotrichaceae   | sf_3 | 9321 | AB108786.1 | marine sediment clone Tokyo Bay D                                                                                                                                                                                                          |
| Proteobacteria | Unclassified     | sf_1 | 8957 | AF354614.1 | marine clone Arctic97C-5                                                                                                                                                                                                                   |
| Proteobacteria | Unclassified     | sf_1 | 8605 | AF382104.1 | bacterioplankton clone ZA2525c                                                                                                                                                                                                             |
| Proteobacteria | Unclassified     | sf_1 | 8654 | AB099939.1 | inactive deep-sea hydrothermal vent chimneys clone lhcB2-31                                                                                                                                                                                |
| Proteobacteria | Coxiellaceae     | sf_3 | 8457 | AJ240918.1 | 5' clone CHAB-XI-27                                                                                                                                                                                                                        |
| Proteobacteria | Methylococcaceae | sf_1 | 9438 | AJ535221.1 | marine sediment above hydrate ridge clone Hyd24-01 proteobacterium                                                                                                                                                                         |
| Proteobacteria | Halomonadaceae   | sf_1 | 8514 | AJ295144.1 | Chromohalobacter israelensis str. ATCC 43985 T                                                                                                                                                                                             |
| Proteobacteria | Moraxellaceae    | sf_3 | 8838 | AJ748267.1 | Psychrobacter psychrophilus CMS 28                                                                                                                                                                                                         |
| Proteobacteria | Pseudomonadaceae | sf_1 | 8691 | AE004501.1 | Pseudomonas aeruginosa str. PAO1                                                                                                                                                                                                           |
| Proteobacteria | Pseudomonadaceae | sf_1 | 8777 | AB095005.1 | Pseudomonas sp. str. KNA6-5                                                                                                                                                                                                                |
| Proteobacteria | Pseudomonadaceae | sf_1 | 8852 | AF063219.1 | Pseudomonas stutzeri str. KC                                                                                                                                                                                                               |
| Proteobacteria | Pseudomonadaceae | sf_1 | 9068 | AF143245.1 | Pseudomonas stutzeri str. A1501                                                                                                                                                                                                            |
| Proteobacteria | Pseudomonadaceae | sf_1 | 8725 | AJ419674.1 | Pseudomonas sp. str. 2N1-1                                                                                                                                                                                                                 |
| Proteobacteria | Pseudomonadaceae | sf_1 | 9238 |            |                                                                                                                                                                                                                                            |
| Proteobacteria | Pseudomonadaceae | sf_1 | 9005 | AJ278108.1 | Pseudomonas sp. str. KY                                                                                                                                                                                                                    |
| Proteobacteria | Pseudomonadaceae | sf_1 | 8513 | AF064458.1 | Pseudomonas monteilii str. CIP 104883                                                                                                                                                                                                      |
| Proteobacteria | Pseudomonadaceae | sf_1 | 9493 | AF430125.1 | Pseudomonas sp. str. dcm7B                                                                                                                                                                                                                 |
| Proteobacteria | Pseudomonadaceae | sf_1 | 8433 | AB001441.1 | Pseudomonas syringae pv. broussonetiae str. KOZ 8101 pv.                                                                                                                                                                                   |
| Proteobacteria | Thiotrichaceae   | sf_3 | 8703 | AF110275.1 | Beggiatoa sp. str. AA5A                                                                                                                                                                                                                    |
| Proteobacteria | Pseudomonadaceae | sf_1 | 9028 | AF468452.1 | Pseudomonas koreensis str. Ps 9-14                                                                                                                                                                                                         |
| Proteobacteria | Pseudomonadaceae | sf_1 | 9267 | AB001450.1 | Pseudomonas syringae pv. theae str. PT1                                                                                                                                                                                                    |
| Proteobacteria | Pseudomonadaceae | sf_1 | 9310 | AJ519791.1 | Pseudomonas sp. str. AC-167                                                                                                                                                                                                                |
| Proteobacteria | Pseudomonadaceae | sf_1 | 8338 | AF267911.1 | Pseudomonas synxantha str. DSM 13080 G                                                                                                                                                                                                     |
| Proteobacteria | Pseudomonadaceae | sf_1 | 8561 | AF332541.1 | Pseudomonas sp. B65                                                                                                                                                                                                                        |
| Proteobacteria | Pseudomonadaceae | sf_1 | 8687 | AF094738.1 | Pseudomonas putida str. ATCC 17472                                                                                                                                                                                                         |
| Proteobacteria | Pseudomonadaceae | sf_1 | 8708 |            |                                                                                                                                                                                                                                            |
| Proteobacteria | Pseudomonadaceae | sf_1 | 9221 | AJ492830.1 | Pseudomonas fulgida str. DSM 14938 = LMG 2146 P 515/12                                                                                                                                                                                     |
| Proteobacteria | Pseudomonadaceae | sf_1 | 9366 | AJ293826.1 | Arctic seawater isolate str. R7366                                                                                                                                                                                                         |
| Proteobacteria | Pseudomonadaceae | sf_1 | 8755 | AJ288146.1 | Pseudomonas sp. SK-1-3-1                                                                                                                                                                                                                   |
| Proteobacteria | Unclassified     | sf_3 | 8327 | AF468398.1 | Arctic sea ice ARK10148                                                                                                                                                                                                                    |
| Proteobacteria | Unclassified     | sf_3 | 8714 | AB021372.1 | Marinobacter hydrocarbonoclasticus str. ATCC 27132T                                                                                                                                                                                        |
| Proteobacteria | Alteromonadaceae | sf_1 | 9239 | AF468400.1 | Arctic sea ice ARK10228                                                                                                                                                                                                                    |
| Proteobacteria | Aeromonadaceae   | sf_1 | 9294 | AJ557849.1 | Arctic deep sea Isolation common chemoorganotrophic oxygen-respiring polar current d 1210 (50 m above sediment Hakon Mosby Mud Vulcano (HMMV 72N 14E)) via serial dilution series applying 2 g/l yeast or meat extract artificial seawater |
| Proteobacteria | Alteromonadaceae | sf_1 | 8174 | AF114499.1 | attached marine recovered surface clone 17 proteobacterium                                                                                                                                                                                 |
| Proteobacteria | Alteromonadaceae | sf_1 | 8318 | AY207502.1 | Aestuuriibacter salexigens str. JC2042                                                                                                                                                                                                     |
| Proteobacteria | Alteromonadaceae | sf_1 | 8863 | AF529060.1 | Alteromonas marina str. SW-47                                                                                                                                                                                                              |
| Proteobacteria | Alteromonadaceae | sf_1 | 9288 | AJ295715.1 | Alteromonas stellipolaris str. LMG 21861                                                                                                                                                                                                   |
| Proteobacteria | Alteromonadaceae | sf_1 | 9501 | AB086226.1 | sea water isolate str. BP-PH                                                                                                                                                                                                               |
| Proteobacteria | Alteromonadaceae | sf_1 | 8172 | AB055791.1 | Pseudoalteromonas sp. str. Bdeep-1                                                                                                                                                                                                         |

|                |                        |       |       |                   |                                                               |
|----------------|------------------------|-------|-------|-------------------|---------------------------------------------------------------|
| Proteobacteria | Alteromonadaceae       | sf_1  | 8336  | AF237977.1        | Alteromonas sp. str. MS23                                     |
| Proteobacteria | Alteromonadaceae       | sf_1  | 8580  | AJ295713.1        | Arctic seawater isolate str. R7076                            |
| Proteobacteria | Alteromonadaceae       | sf_1  | 8932  | AF045560.1        | Pseudoalteromonas antarctica str. N-1                         |
| Proteobacteria | Alteromonadaceae       | sf_1  | 8975  | AB016268.1        | Alteromonas sp. str. NIBH P1M3                                |
| Proteobacteria | Alteromonadaceae       | sf_1  | 9058  | X82136.1          | Pseudoalteromonas carrageenovora str. ATCC 12662T             |
| Proteobacteria | Alteromonadaceae       | sf_1  | 9143  | AJ417594.1        | Pseudoalteromonas agarivorans str. KMM 255                    |
| Proteobacteria | Alteromonadaceae       | sf_1  | 9205  | AF354597.1        | marine clone Arctic96B-17                                     |
| Proteobacteria | Alteromonadaceae       | sf_1  | 9218  | X67024.1          | Pseudoalteromonas haloplanktis str. ATCC 14393                |
| Proteobacteria | Alteromonadaceae       | sf_1  | 9386  | AB016267.1        | Alteromonas sp. str. NIBH P2M11                               |
| Proteobacteria | Pseudoalteromonadaceae | sf_1  | 9627  | AF218245.1        | Pseudoalteromonas sp                                          |
| Proteobacteria | Alteromonadaceae       | sf_1  | 9640  | AY028205.1        | exposed to diatom detritus isolate str. Tw-10 Tw-10           |
| Proteobacteria | Succinivibrionaceae    | sf_1  | 8822  | AF497809.1        | Anaerobiospirillum sp. str. 3J102                             |
| Proteobacteria | Pasteurellaceae        | sf_1  | 9360  | AF224297.1        | Pasteurella multocida subsp. gallicida str. MCCM 00021 subsp. |
| Proteobacteria | Pasteurellaceae        | sf_1  | 8228  | AF268964.1        | Actinobacillus indolicus str. H1419                           |
| Proteobacteria | Pasteurellaceae        | sf_1  | 8861  | AB004031.1        | Haemophilus parasuis 427                                      |
| Proteobacteria | Pasteurellaceae        | sf_1  | 8432  |                   |                                                               |
| Proteobacteria | Pasteurellaceae        | sf_1  | 8848  | AF227858.1        | str. 86355                                                    |
| Proteobacteria | Pasteurellaceae        | sf_1  | 9533  | AF224299.1        | Haemophilus segnis str. MCCM 00337                            |
| Proteobacteria | Pasteurellaceae        | sf_1  | 9628  | AF549390.1        | Histophilus somni str. CCUG 12839                             |
| Proteobacteria | Syntrophobacteraceae   | sf_1  | 9661  | AJ306805.1        | DCP-dechlorinating consortium clone SHD-1                     |
| Proteobacteria | Unclassified           | sf_1  | 10489 | AF299121.1        | S17sBac16 complete clone                                      |
| Proteobacteria | Rickettsiaceae         | sf_1  | 7556  | U11014.1          | Rickettsia bellii str. strains 369-C and G2D42                |
| Proteobacteria | Alcaligenaceae         | sf_1  | 7992  | AJ509012.1        | Alcaligenes faecalis 5659-H                                   |
| Proteobacteria | Enterobacteriaceae     | sf_1  | 8770  |                   |                                                               |
| Proteobacteria | Unclassified           | sf_3  | 468   | AJ241004.1        | marine sediment clone Sva0515                                 |
| Proteobacteria | Coxiellaceae           | sf_3  | 9444  | AF523974.1        | forested wetland clone FW23                                   |
| Proteobacteria | Alteromonadaceae       | sf_1  | 9111  | AF539773.1        | Pseudoalteromonas sp. str. E36                                |
| Proteobacteria | Alteromonadaceae       | sf_1  | 8579  | AJ416756.1        | Psychromonas profunda str. 2825                               |
| Proteobacteria | Pasteurellaceae        | sf_1  | 8195  | NZ_AADP01000001.1 | Haemophilus influenzae str. R2866                             |
| Proteobacteria | Enterobacteriaceae     | sf_1  | 8173  | Z76752.1          | Photobacterium asymbiotica str. ATCC 43949                    |
| Proteobacteria | Enterobacteriaceae     | sf_1  | 8642  | AF373202.1        | Erwinia chrysanthemi str. 580                                 |
| Proteobacteria | Unclassified           | sf_4  | 9951  | AF523973.1        | forested wetland clone FW13                                   |
| Proteobacteria | Unclassified           | sf_6  | 6694  | AF523879.1        | forested wetland clone RCP2-92                                |
| Proteobacteria | Unclassified           | sf_1  | 6732  | AF426002.1        | Anabaena circinalis AWQC118C isolate str. UNSW7               |
| Proteobacteria | Unclassified           | sf_1  | 7199  | AJ532683.1        | uranium mill tailings clone Gitt-KF-194                       |
| Proteobacteria | Methylobacteriaceae    | sf_1  | 7585  | U58018.1          | Methylobacterium thiocyanatum str. ALL/SCN-P                  |
| Proteobacteria | Unclassified           | sf_4  | 6810  | AY033325.1        | marine bacterioplankton clone MB13F01                         |
| Proteobacteria | Unclassified           | sf_6  | 7312  |                   |                                                               |
| Proteobacteria | Phyllobacteriaceae     | sf_1  | 7497  | AJ294416.1        | Pseudaminobacter salicylatoxidans str. KTC001                 |
| Proteobacteria | Rickettsiaceae         | sf_1  | 6809  | U11021.1          | Rickettsia rickettsii str. Sawtooth                           |
| Proteobacteria | Anaplasmataceae        | sf_3  | 6803  | AY007547.1        | Wolbachia sp. Dlem16SWol                                      |
| Proteobacteria | Anaplasmataceae        | sf_3  | 7481  | AF179630.1        | Wolbachia pipientis                                           |
| Proteobacteria | Sphingomonadaceae      | sf_1  | 7440  | AF159257.2        | Sphingobium chungbukense str. DJ77                            |
| Proteobacteria | Sphingomonadaceae      | sf_15 | 7035  | Y09639.1          | Sphingomonas asaccharolytica str. IFO 10564-T                 |
| Proteobacteria | Neisseriaceae          | sf_1  | 7675  | AY157705.1        | Neisseria sp. str. CCUG 46910                                 |
| Proteobacteria | Rhodocyclaceae         | sf_1  | 7800  | AY013692.1        | sample taken upstream landfill clone BVC77 landfill           |
| Proteobacteria | Methylophilaceae       | sf_1  | 8137  | AF289159.1        | freshwater clone PRD01a011B                                   |
| Proteobacteria | Procabacteriaceae      | sf_1  | 8136  | AF177426.1        | Acanthamoeba sp. UWC6 symbiont                                |
| Proteobacteria | Alcaligenaceae         | sf_1  | 8062  | AJ277742.1        | Brackiella oedipodis str. LMG 1945 R8846                      |
| Proteobacteria | Comamonadaceae         | sf_1  | 7856  | AY169431.1        | Variovorax paradoxus                                          |

|                |                      |      |       |            |                                                                      |
|----------------|----------------------|------|-------|------------|----------------------------------------------------------------------|
| Proteobacteria | Burkholderiaceae     | sf_1 | 7771  | AB021374.1 | Burkholderia glathei str. ATCC 29195T                                |
| Proteobacteria | Burkholderiaceae     | sf_1 | 7782  | AY040365.1 | Burkholderia hospita str. LMG 20598T                                 |
| Proteobacteria | Burkholderiaceae     | sf_1 | 7747  |            |                                                                      |
| Proteobacteria | Rhodocyclaceae       | sf_1 | 7762  | AF150698.1 | Elbe River snow isolate Iso18 Iso18_1411                             |
| Proteobacteria | Unclassified         | sf_1 | 8747  | AJ536882.1 | uranium waste soil clone JG30-KF-CM35                                |
| Proteobacteria | Unclassified         | sf_1 | 9246  | AY221036.1 | Mammoth Cave sediment clone CCD24                                    |
| Proteobacteria | Acidithiobacillaceae | sf_1 | 9224  | AJ459804.1 | Acidithiobacillus albertensis str. DSM 14366                         |
| Proteobacteria | Unclassified         | sf_3 | 9568  | AF523888.1 | forested wetland clone RCP2-96                                       |
| Proteobacteria | Chromatiaceae        | sf_1 | 8697  | AJ401211.1 | Thiococcus sp. AT2204                                                |
| Proteobacteria | Francisellaceae      | sf_1 | 9554  | AF206675.1 | Tilapia parasite TPT-541                                             |
| Proteobacteria | Xanthomonadaceae     | sf_3 | 9270  | AJ293463.1 | Stenotrophomonas rhizophila str. e-p10                               |
| Proteobacteria | Xanthomonadaceae     | sf_3 | 9286  | AJ131912.1 | Stenotrophomonas maltophilia str. LMG 11104                          |
| Proteobacteria | Unclassified         | sf_1 | 8962  | AF406526.1 | bacterioplankton clone AEGEAN_234                                    |
| Proteobacteria | Coxiellaceae         | sf_3 | 9198  | AJ295651.1 | uranium mining waste pile clone KF-JG30-B15 KF-JG30-B15              |
| Proteobacteria | Moraxellaceae        | sf_3 | 8366  | AJ609556.1 | Psychrobacter frigidicola str. DSM 12411                             |
| Proteobacteria | Moraxellaceae        | sf_3 | 9466  | AF509830.1 | Acinetobacter tandoii str. 4N13                                      |
| Proteobacteria | Pseudomonadaceae     | sf_1 | 8508  | AF530073.1 | Pseudomonas citronellolis str. TERIDB26                              |
| Proteobacteria | Pseudomonadaceae     | sf_1 | 8344  | AF425998.1 | Anabaena circinalis AWQC118C isolate str. UNSW3                      |
| Proteobacteria | Pseudomonadaceae     | sf_1 | 8553  | AB046997.1 | Pseudomonas fulva str. IAM 1587                                      |
| Proteobacteria | Pseudomonadaceae     | sf_1 | 9613  | U01916.1   | Pseudomonas flavescens str. B62                                      |
| Proteobacteria | Pseudomonadaceae     | sf_1 | 9219  | AF181576.1 | Pseudomonas cf. monteilii 9                                          |
| Proteobacteria | Pseudomonadaceae     | sf_1 | 8209  | AJ518787.1 | uranium mining waste pile clone JG37-AG-122 proteobacterium          |
| Proteobacteria | Pseudomonadaceae     | sf_1 | 8601  | AB021401.1 | Pseudomonas marginalis str. ATCC 10844T                              |
| Proteobacteria | Pseudomonadaceae     | sf_1 | 9175  | AF405328.1 | Pseudomonas extremorientalis str. KMM3447                            |
| Proteobacteria | Pseudomonadaceae     | sf_1 | 9172  | AB041885.1 | Pseudomonas psychrophila str. E-3                                    |
| Proteobacteria | Alteromonadaceae     | sf_1 | 8578  | AY147906.1 | Marinobacter lipolyticus str. SM-19                                  |
| Proteobacteria | Unclassified         | sf_3 | 8606  |            |                                                                      |
| Proteobacteria | Alteromonadaceae     | sf_1 | 8374  | AB076560.1 | Agarivorans albus str. MKT 89                                        |
| Proteobacteria | Alteromonadaceae     | sf_1 | 8533  |            |                                                                      |
| Proteobacteria | Shewanellaceae       | sf_1 | 8641  | AJ252022.1 | Moritella abyssi str. 2693                                           |
| Proteobacteria | Alteromonadaceae     | sf_1 | 9384  | AJ132226.1 | Moritella viscosa str. NVI 88/478T                                   |
| Proteobacteria | Pasteurellaceae      | sf_1 | 9349  | AF227861.1 | Pasteurella sp. str. 91985                                           |
| Proteobacteria | Pasteurellaceae      | sf_1 | 8614  | AF359941.1 | Acidithiobacillus thiooxidans str. KCTC 8928P                        |
| Proteobacteria | Desulfomicrobiaceae  | sf_1 | 10079 | AJ277896.1 | Desulfomicrobium baculatum str. DSM 1742                             |
| Proteobacteria | Desulfovibrionaceae  | sf_1 | 9709  | AB089104.1 | termite gut homogenate clone Rs-N31 proteobacterium                  |
| Proteobacteria | Unclassified         | sf_7 | 10048 |            |                                                                      |
| Proteobacteria | Desulfuromonaceae    | sf_1 | 10020 | AJ519664.1 | uranium mill tailings soil sample clone GuBH2-AG-114 proteobacterium |
| Proteobacteria | Desulfobacteraceae   | sf_5 | 9800  | AF523960.1 | forested wetland clone FW57                                          |
| Proteobacteria | Campylobacteraceae   | sf_3 | 10397 | AB030592.1 | groundwater clone 1006                                               |
| Proteobacteria | Unclassified         | sf_1 | 10407 | AF420342.1 | hydrothermal sediment clone AF420342                                 |
| Proteobacteria | Campylobacteraceae   | sf_3 | 10540 | AF550655.1 | Campylobacter showae str. LMG 12636                                  |
| Proteobacteria | Nitrospinaceae       | sf_2 | 594   | AJ296568.1 | uranium mining mill tailing clone GR-296.II.52 GR-296.I.52           |
| Proteobacteria | Oxalobacteraceae     | sf_1 | 7968  | U49757.2   | Oxalobacter formigenes str. OXB ovine rumen                          |
| Proteobacteria | Ralstoniaceae        | sf_1 | 7761  | AF280433.1 | Ralstonia detusculanense str. APF11                                  |
| Proteobacteria | Unclassified         | sf_3 | 9105  |            |                                                                      |
| Proteobacteria | Pasteurellaceae      | sf_1 | 8555  | AY613451.1 | Haemophilus influenzae str. M9741                                    |
| Proteobacteria | Enterobacteriaceae   | sf_1 | 8607  | AF476100.1 | Amonostherium lichtensuloides symbiont                               |

|                |                      |      |       |            |                                                            |
|----------------|----------------------|------|-------|------------|------------------------------------------------------------|
| Proteobacteria | Unclassified         | sf_1 | 6945  | AB081581.3 | Rhizobiales str. A48                                       |
| Proteobacteria | Alcaligenaceae       | sf_1 | 7932  | AJ278451.1 | Achromobacter subsp. denitrificans str. DSM 30026 (T)      |
| Proteobacteria | Unclassified         | sf_1 | 9282  |            |                                                            |
| Proteobacteria | Alteromonadaceae     | sf_1 | 8643  | AY771715.1 | Pseudoalteromonas porphyrae str. S2-65                     |
| Proteobacteria | Pasteurellaceae      | sf_1 | 8876  | AF053894.1 | Mannheimia sp. R19.2 str. R19.2; CCUG 38463 R19.2          |
| Proteobacteria | Desulfovibrionaceae  | sf_1 | 10016 | AB089110.1 | termite gut homogenate clone Rs-N35 proteobacterium        |
| Proteobacteria | Unclassified         | sf_9 | 9784  | AY177804.1 | Antarctic sediment clone LH5_30                            |
| Proteobacteria | Syntrophobacteraceae | sf_1 | 9731  | AJ518795.1 | uranium mining waste pile clone JG37-AG-90 proteobacterium |
| Proteobacteria | Acetobacteraceae     | sf_1 | 7529  | AJ012698.1 | Gluconacetobacter europaeus str. ZIM B028 V3               |
| Proteobacteria | Unclassified         | sf_1 | 7222  | AF407727.1 | Great Artesian Basin clone B79                             |
| Proteobacteria | Hyphomicrobiaceae    | sf_1 | 7646  | Y14304.1   | Hyphomicrobium aestuarii str. DSM 1564                     |
| Proteobacteria | Caulobacteraceae     | sf_1 | 6968  | AB021415.1 | Brevundimonas aestuaria str. IAM 12691T                    |
| Proteobacteria | Anaplasmataceae      | sf_3 | 6628  | U23709.1   | Wolbachia pipientis                                        |
| Proteobacteria | Anaplasmataceae      | sf_3 | 6648  | AF035160.1 | Wolbachia sp                                               |
| Proteobacteria | Sphingomonadaceae    | sf_1 | 7036  | AY026916.1 | Lutibacterium anuloederans str. LC8                        |
| Proteobacteria | Unclassified         | sf_6 | 7572  |            |                                                            |
| Proteobacteria | Unclassified         | sf_3 | 7765  |            |                                                            |
| Proteobacteria | Nitrosomonadaceae    | sf_1 | 7770  | BX321856.1 | Nitrosomonas europaea str. ATCC 19718                      |
| Proteobacteria | Alcaligenaceae       | sf_1 | 7768  | AF371864.1 | swine intestine clone p-861-a5                             |
| Proteobacteria | Thiotrichaceae       | sf_3 | 8321  | AF532769.1 | Wadden Sea sediment clone Dangast A9                       |
| Proteobacteria | Chromatiaceae        | sf_1 | 8546  | AJ242772.1 | Thiocapsa litoralis                                        |
| Proteobacteria | Pseudomonadaceae     | sf_1 | 8813  | AY150184.1 | Lyrodus pedicellatus symbiont                              |
| Proteobacteria | Pseudomonadaceae     | sf_1 | 9300  | AY150183.1 | Lyrodus pedicellatus symbiont                              |
| Proteobacteria | Pseudomonadaceae     | sf_1 | 9002  | AJ316016.1 | Paederus fuscipes endosymbiont                             |
| Proteobacteria | Pseudomonadaceae     | sf_1 | 8853  | AB021398.1 | Pseudomonas cichorii str. ATCC 10857T                      |
| Proteobacteria | Pseudomonadaceae     | sf_1 | 9243  | Z76670.1   | Pseudomonas tolaasii str. LMG 2342T ()                     |
| Proteobacteria | Alteromonadaceae     | sf_1 | 9236  | AF114501.1 | attached marine recovered surface clone 18 proteobacterium |
| Proteobacteria | Alteromonadaceae     | sf_1 | 9369  | X82144.1   | Pseudoalteromonas luteoviolacea str. NCIMB 1893T           |
| Proteobacteria | Pasteurellaceae      | sf_1 | 9213  | AF224307.1 | Haemophilus quentini str. MCCM 02026                       |
| Proteobacteria | Pasteurellaceae      | sf_1 | 8952  | M75068.1   | Actinobacillus lignieresii                                 |
| Proteobacteria | Enterobacteriaceae   | sf_1 | 8182  | X07652.1   | Proteus vulgaris str. IFAM 1731                            |
| Proteobacteria | Desulfovibrionaceae  | sf_1 | 10071 | M34113.1   | Desulfovibrio desulfuricans                                |
| Proteobacteria | Syntrophaceae        | sf_3 | 9665  | X85132.1   | Syntrophus gentianae str. HQgoe1                           |
| Proteobacteria | Unclassified         | sf_1 | 6830  | AF523882.1 | coal effluent wetland clone RCP124                         |
| Proteobacteria | Ralstoniaceae        | sf_1 | 7823  | AF312022.1 | Wautersia basillensis str. DSM 11853                       |
| Proteobacteria | Unclassified         | sf_1 | 3084  | AF523884.1 | coal effluent wetland clone RCP216                         |
| Proteobacteria | Thiotrichaceae       | sf_3 | 8559  | L40998.1   | Thioploca ingrca                                           |
| Proteobacteria | Unclassified         | sf_3 | 8676  |            |                                                            |
| Proteobacteria | Alteromonadaceae     | sf_1 | 9292  |            |                                                            |
| Proteobacteria | Unclassified         | sf_1 | 10076 | AF407700.1 | Great Artesian Basin clone G13                             |
| Proteobacteria | Bradyrhizobiaceae    | sf_1 | 7353  | AY216437.1 | temperate estuarine mud clone HC65                         |
| Proteobacteria | Rhodobacteraceae     | sf_1 | 6701  | AF245632.1 | Roseobacter clone NAC11-3                                  |
| Proteobacteria | Rhodobacteraceae     | sf_1 | 6980  | AJ582226.1 | Loktanela vestfoldensis str. LMG 22003                     |
| Proteobacteria | Rhodobacteraceae     | sf_1 | 7263  |            |                                                            |
| Proteobacteria | Nitrosomonadaceae    | sf_1 | 7682  | AF363291.1 | Nitrosovibrio sp. str. RY6A                                |
| Proteobacteria | Nitrosomonadaceae    | sf_1 | 7796  | AF080256.1 | Nitrospira sp. str. TYM9                                   |
| Proteobacteria | Acidithiobacillaceae | sf_1 | 8320  | AF543507.1 | acid mine drainage clone BA11                              |



|                |                        |       |       |            |                                                                       |
|----------------|------------------------|-------|-------|------------|-----------------------------------------------------------------------|
| Proteobacteria | Acidithiobacillaceae   | sf_1  | 8552  | AJ278723.1 | Acidithiobacillus ferrooxidans str. D2                                |
| Proteobacteria | Unclassified           | sf_1  | 9128  | X95229.1   | Lucina nassula gill symbiont                                          |
| Proteobacteria | Unclassified           | sf_1  | 9316  |            |                                                                       |
| Proteobacteria | Unclassified           | sf_1  | 8231  | AJ536870.1 | uranium waste soil clone JG30a-KF-21                                  |
| Proteobacteria | Xanthomonadaceae       | sf_3  | 8577  | AF442743.1 | Xanthomonas axonopodis pv. citri str. MA                              |
| Proteobacteria | Unclassified           | sf_3  | 8245  |            |                                                                       |
| Proteobacteria | Pseudomonadaceae       | sf_1  | 8850  | D88521.1   | Agrobacterium agile str. IAM12615                                     |
| Proteobacteria | Pseudoalteromonadaceae | sf_1  | 9339  | AF284230.1 | Pseudoalteromonas sp. str. 05                                         |
| Proteobacteria | Shewanellaceae         | sf_1  | 8201  | AB094597.1 | Shewanella surugaensis str. c959                                      |
| Proteobacteria | Enterobacteriaceae     | sf_1  | 9290  | AF465797.1 | Baumannia cicadellinicola                                             |
| Proteobacteria | Unclassified           | sf_1  | 10259 |            |                                                                       |
| Proteobacteria | Polyangiaceae          | sf_3  | 9900  | AF280857.1 | bioreactor clone mle1-27                                              |
| Proteobacteria | Unclassified           | sf_9  | 10049 | AJ306774.1 | DCP-dechlorinating consortium clone SHA-72                            |
| Proteobacteria | Syntrophobacteraceae   | sf_1  | 10013 | AF420341.2 | hydrothermal sediment clone AF420341                                  |
| Proteobacteria | Syntrophobacteraceae   | sf_1  | 10221 | AF482439.1 | granular sludge clone R3p4                                            |
| Proteobacteria | Desulfobulbaceae       | sf_1  | 10047 | AY355301.1 | epibiotic clone C11-D3                                                |
| Proteobacteria | Syntrophaceae          | sf_3  | 10067 | AF323766.1 | benzoate-degrading consortium clone BA044                             |
| Proteobacteria | Unclassified           | sf_1  | 10084 | AF543496.1 | acid mine drainage clone AS6                                          |
| Proteobacteria | Syntrophobacteraceae   | sf_1  | 10021 | AJ519630.1 | uranium mill tailings soil sample clone Sh765B-TzT-29 proteobacterium |
| Proteobacteria | Unclassified           | sf_1  | 9945  | AF225446.1 | acid mine drainage clone BA18                                         |
| Proteobacteria | Alcaligenaceae         | sf_1  | 7984  | AJ318125.1 | Waste-gas biofilter clone Blfciii38                                   |
| Proteobacteria | Unclassified           | sf_1  | 7993  | AF423222.1 | soil clone 1326-2                                                     |
| Proteobacteria | Unclassified           | sf_6  | 7340  | AJ536878.1 | uranium mining waste pile soil sample clone JG30-KF-AS50              |
| Proteobacteria | Alcaligenaceae         | sf_1  | 7737  | AY081977.1 | atrazine-catabolizing microbial presence methanol clone KRA30+06A     |
| Proteobacteria | Thiotrichaceae         | sf_3  | 8477  | AF532774.1 | marine sediment clone Limfjorden L8                                   |
| Proteobacteria | Roseococcaceae         | sf_1  | 7500  | AF407720.1 | Great Artesian Basin clone B35                                        |
| Proteobacteria | Acetobacteraceae       | sf_1  | 7600  | AJ001632.1 | Acetobacter pomorum str. LTH2458                                      |
| Proteobacteria | Unclassified           | sf_6  | 6918  | AJ581616.1 | soil near uranium mill tailings clone KCM-C-45                        |
| Proteobacteria | Bradyrhizobiaceae      | sf_1  | 6887  | AB067729.1 | Bradyrhizobium str. YB2                                               |
| Proteobacteria | Phyllobacteriaceae     | sf_1  | 6857  | AY195844.1 | Mesorhizobium mediterraneum str. PECA20                               |
| Proteobacteria | Phyllobacteriaceae     | sf_1  | 7381  | AJ011759.1 | Aminobacter aminovorans str. DSM7048T                                 |
| Proteobacteria | Unclassified           | sf_20 | 6763  |            |                                                                       |
| Proteobacteria | Unclassified           | sf_1  | 8037  | AY323827.1 | Chitinimonas taiwanensis str. cf                                      |
| Proteobacteria | Unclassified           | sf_1  | 9059  | AF361096.1 | activated sludge clone SBRH10                                         |
| Proteobacteria | Unclassified           | sf_3  | 9498  |            |                                                                       |
| Proteobacteria | Chromatiaceae          | sf_1  | 9054  |            |                                                                       |
| Proteobacteria | Methylococcaceae       | sf_1  | 8243  | AF521582.1 | isolate str. IR                                                       |
| Proteobacteria | Unclassified           | sf_1  | 8403  | AF432146.1 | Selenate-reducing isolate str. KE4OH1                                 |
| Proteobacteria | Alcanivoraceae         | sf_1  | 9658  | AB053127.1 | Alcanivorax sp. str. Haw1                                             |
| Proteobacteria | Pseudomonadaceae       | sf_1  | 8288  |            |                                                                       |
| Proteobacteria | Alteromonadaceae       | sf_1  | 8196  |            |                                                                       |
| Proteobacteria | Unclassified           | sf_1  | 10092 | AY102330.1 | heavy metal-contaminated soil clone a13134                            |
| Proteobacteria | Syntrophobacteraceae   | sf_1  | 9864  | AJ518801.1 | uranium mining waste pile clone JG37-AG-133 proteobacterium           |
| Proteobacteria | Desulfobulbaceae       | sf_1  | 10062 | AJ535241.1 | marine sediment above hydrate ridge clone Hyd24-11 proteobacterium    |
| Proteobacteria | Desulfobacteraceae     | sf_5  | 10046 | AJ237603.1 | Desulfobacterium ceticum str. DSM 7267 oil recovery water             |
| Proteobacteria | Campylobacteraceae     | sf_3  | 10463 | AF482990.1 | Campylobacter subsp. fetus                                            |
| Proteobacteria | Burkholderiaceae       | sf_1  | 7720  | AY218566.1 | penguin droppings sediments clone KD1-79                              |

|                |                      |      |       |            |                                                                                |
|----------------|----------------------|------|-------|------------|--------------------------------------------------------------------------------|
| Proteobacteria | Enterobacteriaceae   | sf_1 | 9309  | AJ417833.1 | Buchnera sp                                                                    |
| Proteobacteria | Campylobacteraceae   | sf_3 | 10484 | U03022.1   | Campylobacter helveticus                                                       |
| Proteobacteria | Unclassified         | sf_2 | 6697  | AB089090.1 | termite gut homogenate clone Rs-D84<br>proteobacterium                         |
| Proteobacteria | Unclassified         | sf_3 | 8230  |            |                                                                                |
| Proteobacteria | Moraxellaceae        | sf_3 | 9428  | AF143841.1 | hydrocarbon-degrading consortium clone AF2-1D                                  |
| Proteobacteria | Pasteurellaceae      | sf_1 | 9030  | AY216870.1 | Volucribacter amazonae str. B96/5                                              |
| Proteobacteria | Syntrophobacteraceae | sf_1 | 9845  | AJ518800.1 | uranium mining waste pile clone JG37-AG-128<br>proteobacterium                 |
| Proteobacteria | Unclassified         | sf_1 | 7060  |            |                                                                                |
| Proteobacteria | Rhizobiaceae         | sf_1 | 7051  | D12786.1   | Mycoplana dimorpha str. IAM 13154                                              |
| Proteobacteria | Nitrosomonadaceae    | sf_1 | 7931  | L35509.1   | Nitrosospira multififormis                                                     |
| Proteobacteria | Alcaligenaceae       | sf_1 | 7788  | AY081994.1 | atrazine-catabolizing microbial absence methanol<br>clone KRA30-58             |
| Proteobacteria | Chromatiaceae        | sf_1 | 9052  |            |                                                                                |
| Proteobacteria | Unclassified         | sf_1 | 8532  |            |                                                                                |
| Proteobacteria | Pseudomonadaceae     | sf_1 | 8487  |            |                                                                                |
| Proteobacteria | Pseudomonadaceae     | sf_1 | 9343  | AF448515.1 | Cellvibrio subsp. mixtus str. ACM 2601                                         |
| Proteobacteria | Alteromonadaceae     | sf_1 | 8368  | AJ507251.1 | Pseudoalteromonas mariniglutinosa str. KMM 3635                                |
| Proteobacteria | Alteromonadaceae     | sf_1 | 9364  | U85855.1   | Pseudoalteromonas prydzensis str. MB8-11                                       |
| Proteobacteria | Enterobacteriaceae   | sf_1 | 8286  | AF476102.1 | Cyphonococcus alpinus symbiont                                                 |
| Proteobacteria | Polyangiaceae        | sf_3 | 9912  | AJ532713.1 | uranium mining waste pile clone JG34-KF-14<br>proteobacterium                  |
| Proteobacteria | Unclassified         | sf_1 | 9959  | AF523965.1 | forested wetland clone FW110                                                   |
| Proteobacteria | Unclassified         | sf_4 | 10024 | AF420338.1 | hydrothermal sediment clone AF420338                                           |
| Proteobacteria | Oxalobacteraceae     | sf_1 | 7866  | AB021375.1 | Paucimonas lemoignei str. ATCC 17989T                                          |
| Proteobacteria | Unclassified         | sf_3 | 9124  | AY145601.1 | 10e-6 dilution marine samples Weser estuary clone<br>DC8-80-1 proteobacterium  |
| Proteobacteria | Unclassified         | sf_8 | 9558  |            |                                                                                |
| Proteobacteria | Enterobacteriaceae   | sf_1 | 8282  | AF476101.1 | Antonina pretiosa symbiont                                                     |
| Proteobacteria | Comamonadaceae       | sf_1 | 8112  | AF336312.1 | Comamonas testosteroni str. SMCC B329                                          |
| Proteobacteria | Neisseriaceae        | sf_1 | 7662  | AF526930.2 | Mars Odyssey Orbiter and encapsulation facility<br>clone T5-1 sp.              |
| Proteobacteria | Oxalobacteraceae     | sf_1 | 8013  | AF236013.1 | isolate str. A1020                                                             |
| Proteobacteria | Unclassified         | sf_9 | 9876  | AY093471.1 | deep marine sediment clone MB-B2-106                                           |
| Proteobacteria | Desulfobulbaceae     | sf_1 | 10187 | AF507840.1 | Mono Lake at depth 23 m station 6 July 2000 clone<br>ML623J-57 proteobacterium |
| Proteobacteria | Campylobacteraceae   | sf_3 | 10523 | AF449239.1 | Riftia pachyptila's tube clone R103-B70                                        |
| Proteobacteria | Bradyrhizobiaceae    | sf_1 | 7390  | U87781.1   | Afipia genosp. 10 str. G8996                                                   |
| Proteobacteria | Rhizobiaceae         | sf_1 | 7568  | U47303.1   | Rhizobium etli str. USDA 2667 ATCC 14483<br>SEMIA 043                          |
| Proteobacteria | Rhodobacteraceae     | sf_1 | 6652  | AF353235.1 | marine clone Arctic96A-1                                                       |
| Proteobacteria | Sphingomonadaceae    | sf_1 | 7100  | D16147.1   | Novosphingobium capsulatum str. GIFU11526                                      |
| Proteobacteria | Unclassified         | sf_3 | 7974  |            |                                                                                |
| Proteobacteria | Burkholderiaceae     | sf_1 | 7969  | U37342.1   | Burkholderia sp.                                                               |
| Proteobacteria | Unclassified         | sf_3 | 8646  |            |                                                                                |
| Proteobacteria | Piscirickettsiaceae  | sf_3 | 9557  | AF449225.1 | Riftia pachyptila's tube clone R76-B23                                         |
| Proteobacteria | Oceanospirillaceae   | sf_1 | 9351  | AF382102.1 | bacterioplankton clone ZA2333c                                                 |
| Proteobacteria | Unclassified         | sf_3 | 8959  | AF406527.1 | bacterioplankton clone AEGEAN_133                                              |
| Proteobacteria | Enterobacteriaceae   | sf_1 | 8700  | AF489427.1 | Baumannia cicadellinicola                                                      |
| Proteobacteria | Enterobacteriaceae   | sf_1 | 9293  | AJ245598.1 | USA clone 14/7                                                                 |
| Proteobacteria | Desulfovibrionaceae  | sf_1 | 10244 |            |                                                                                |
| Proteobacteria | Unclassified         | sf_4 | 9741  | AJ518791.1 | uranium mining waste pile clone JG37-AG-30                                     |

|                |                                  |       |       |            |                                                                             |
|----------------|----------------------------------|-------|-------|------------|-----------------------------------------------------------------------------|
| Proteobacteria | Helicobacteraceae                | sf_23 | 10443 | U00679.1   | proteobacterium                                                             |
| Proteobacteria | Helicobacteraceae                | sf_3  | 10576 | AF142585.1 | Helicobacter pylori str. 85D08                                              |
| Proteobacteria | Geobacteraceae                   | sf_1  | 482   | AF529120.1 | Helicobacter sp. 'liver 3' str. liver 3                                     |
|                |                                  |       |       |            | trichloroethene-contaminated site clone FTLM205                             |
|                |                                  |       |       |            | proteobacterium                                                             |
| Proteobacteria | Geobacteraceae                   | sf_1  | 10171 |            |                                                                             |
| Proteobacteria | Chromatiaceae                    | sf_1  | 9370  | AB010860.1 | isolate str. HTB019                                                         |
| Proteobacteria | Shewanellaceae                   | sf_1  | 8662  |            |                                                                             |
| Proteobacteria | Enterobacteriaceae               | sf_1  | 9135  | AJ487029.1 | intestine Zophobas mori clone                                               |
| Proteobacteria | Enterobacteriaceae               | sf_1  | 9157  | AF293618.1 | Secondary symbiont type-U Acyrthosiphon pisum (rrs) clone 5B type-U         |
| Proteobacteria | Desulfobacteraceae               | sf_5  | 10268 |            |                                                                             |
| Proteobacteria | Unclassified                     | sf_5  | 7471  | AJ347025.1 | sponge clone TK03                                                           |
| Proteobacteria | Burkholderiaceae                 | sf_1  | 7957  | AF476089.1 | Maconellicoccus hirsutus symbiont                                           |
| Proteobacteria | Desulfobulbaceae                 | sf_1  | 9739  | AJ535252.1 | gas hydrate clone Hyd89-51                                                  |
| Proteobacteria | Phyllobacteriaceae               | sf_1  | 7009  |            |                                                                             |
| Proteobacteria | Rhizobiaceae                     | sf_1  | 6683  | D14516.1   | Sinorhizobium fredii str. ATCC35423                                         |
| Proteobacteria | Rhodobacteraceae                 | sf_1  | 7433  | AF359537.1 | Scrippsiella trochoidea NEPCC 15                                            |
| Proteobacteria | Unclassified                     | sf_5  | 6735  | AF510192.1 | Candidatus Pelagibacter ubique str. HTCC1002                                |
| Proteobacteria | Unclassified                     | sf_1  | 8035  |            |                                                                             |
| Proteobacteria | Rhodocyclaceae                   | sf_1  | 8131  |            |                                                                             |
| Proteobacteria | Burkholderiaceae                 | sf_1  | 8097  | AB091761.1 | Burkholderia cepacia                                                        |
| Proteobacteria | Chromatiaceae                    | sf_1  | 9048  | AJ401209.1 | Allochrochromatium sp. AT2202                                               |
| Proteobacteria | Cardiobacteriaceae               | sf_1  | 8536  | M35014.1   | Cardiobacterium hominis                                                     |
| Proteobacteria | Moraxellaceae                    | sf_3  | 8604  | AB087260.2 | Moraxella oblonga str. IAM 14971                                            |
| Proteobacteria | Moraxellaceae                    | sf_3  | 9641  | X81662.1   | Acinetobacter haemolyticus                                                  |
| Proteobacteria | Pseudomonadaceae                 | sf_1  | 8754  | AB076857.1 | Pseudomonas sp. str. P400Y-1                                                |
| Proteobacteria | Myxococcaceae                    | sf_1  | 10358 | AJ233917.1 | Myxococcus fulvus str. Mx f2                                                |
| Proteobacteria | Desulfobulbaceae                 | sf_1  | 10107 | AJ535243.1 | marine sediment above hydrate ridge clone Hyd24-30 proteobacterium          |
|                |                                  |       |       |            | marine methane seep clone 1513                                              |
| Proteobacteria | Unclassified                     | sf_9  | 9738  | AF354149.1 |                                                                             |
| Proteobacteria | Desulfobacteraceae               | sf_5  | 10239 |            |                                                                             |
| Proteobacteria | Helicobacteraceae                | sf_3  | 10602 |            |                                                                             |
| Proteobacteria | Unclassified                     | sf_1  | 9344  | AF005249.1 | Shewanella algae str. ATCC 51192                                            |
| Proteobacteria | Enterobacteriaceae               | sf_1  | 8603  | AF476106.1 | Melanococcus albizziae symbiont                                             |
| Proteobacteria | Enterobacteriaceae               | sf_1  | 8627  | AF476099.1 | Australicoccus grevilleae symbiont                                          |
| Proteobacteria | Enterobacteriaceae               | sf_1  | 8362  | AF453251.1 | Klebsiella pneumoniae str. ASR1                                             |
| Proteobacteria | Beijerinck/Rhodoplan/Methylocyst | sf_3  | 7239  | AF358664.1 | Thalassospira lucentensis                                                   |
| Proteobacteria | Unclassified                     | sf_3  | 8045  |            |                                                                             |
| Proteobacteria | Enterobacteriaceae               | sf_1  | 8467  | AB061685.1 | Serratia marcescens subsp. sakuensis str. KRED subsp.                       |
|                |                                  |       |       |            | Serratia entomophila str. DSM 12358                                         |
| Proteobacteria | Enterobacteriaceae               | sf_1  | 8739  | AJ233427.1 |                                                                             |
| Proteobacteria | Enterobacteriaceae               | sf_1  | 8225  |            |                                                                             |
| Proteobacteria | Enterobacteriaceae               | sf_1  | 9337  | U90758.1   | Rahnella genosp. 3 str. DSM 30078                                           |
| Proteobacteria | Magnetospirillaceae              | sf_1  | 6922  | AY171615.1 | Dechlorospirillum sp. str. SN1                                              |
| Proteobacteria | Beijerinck/Rhodoplan/Methylocyst | sf_3  | 7153  | AJ563928.1 | Methylocella tundrae str. Y1                                                |
| Proteobacteria | Bradyrhizobiaceae                | sf_1  | 7029  |            |                                                                             |
| Proteobacteria | Phyllobacteriaceae               | sf_1  | 7216  | D88524.1   | Ahrensia kielensis str. IAM12618                                            |
| Proteobacteria | Rhizobiaceae                     | sf_1  | 6972  | AY040360.1 | Ensifer adhaerens str. LMG 20582                                            |
| Proteobacteria | Rhizobiaceae                     | sf_1  | 6974  | AF441730.1 | India: Himalayas Kaza Spiti Valley Cold Desert isolate str. Kaza-35 Kaza-35 |
| Proteobacteria | Rhizobiaceae                     | sf_1  | 6964  | AE008265.2 | Agrobacterium tumefaciens str. C58 Cereon                                   |
| Proteobacteria | Rhodobacteraceae                 | sf_1  | 7026  | AY005463.1 | Leisingera methylohalidivorans str. MB2                                     |

|                |                     |      |       |            |                                                                                     |
|----------------|---------------------|------|-------|------------|-------------------------------------------------------------------------------------|
| Proteobacteria | Unclassified        | sf_5 | 7025  | AF382105.1 | bacterioplankton clone ZA2526c                                                      |
| Proteobacteria | Sphingomonadaceae   | sf_1 | 7548  | U87784.1   | Afipia genosp. 13 str. G8991                                                        |
| Proteobacteria | Sphingomonadaceae   | sf_1 | 6690  | AY048657.1 | Porphyrobacter tepidarius str. OK5APO                                               |
| Proteobacteria | Unclassified        | sf_3 | 8036  | AJ519624.1 | Uranium mill tailings soil sample clone Sh765B-TzT-132 proteobacterium              |
| Proteobacteria | Comamonadaceae      | sf_1 | 7705  | AY218644.1 | penguin droppings sediments clone KD4-7                                             |
| Proteobacteria | Burkholderiaceae    | sf_1 | 8059  | Y17010.1   | Burkholderia caribensis str. MWAP71                                                 |
| Proteobacteria | Burkholderiaceae    | sf_1 | 8068  | X67039.1   | Burkholderia caryophylli str. ATCC 25418                                            |
| Proteobacteria | Piscirickettsiaceae | sf_3 | 8664  | AJ237758.1 | Thiomicrospira sp. str. Milos-T2                                                    |
| Proteobacteria | Xanthomonadaceae    | sf_3 | 8983  | AF012541.1 | Iron oxidising strain ES-1                                                          |
| Proteobacteria | Xanthomonadaceae    | sf_3 | 9320  | AJ318204.1 | Waste-gas biofilter clone Blyi3                                                     |
| Proteobacteria | Moraxellaceae       | sf_3 | 9359  | AB101444.1 | Acinetobacter junii str. S33                                                        |
| Proteobacteria | Alteromonadaceae    | sf_1 | 8484  | AF513454.1 | Alteromonadaceae isolate str. LA50                                                  |
| Proteobacteria | Alteromonadaceae    | sf_1 | 8503  | AF468401.1 | Arctic sea ice ARK10244                                                             |
| Proteobacteria | Alteromonadaceae    | sf_1 | 9486  | AF406617.1 | Marine isolate str. GK-2001                                                         |
| Proteobacteria | Alteromonadaceae    | sf_1 | 9067  | AF006669.1 | Shewanella algae str. ACM 4733                                                      |
| Proteobacteria | Unclassified        | sf_3 | 9473  | AF468261.1 | Arctic pack ice; northern Fram Strait; 80 31.1 N; 01 deg 59.7 min E clone ARKDMS-58 |
| Proteobacteria | Polyangiaceae       | sf_3 | 9755  | AF382126.1 | bacterioplankton clone ZA3704c                                                      |
| Proteobacteria | Desulfobacteraceae  | sf_5 | 9666  | AJ535229.1 | marine sediment above hydrate ridge clone Hyd89-13 proteobacterium                  |
| Proteobacteria | Unclassified        | sf_9 | 9798  | AJ519663.1 | uranium mill tailings soil sample clone GuBH2-AD/TzT-67 proteobacterium             |
| Proteobacteria | Desulfobulbaceae    | sf_1 | 10332 | AF099059.1 | Psychrophilic sulfate-reducing isolate str. LSV23 bacterium                         |
| Proteobacteria | Helicobacteraceae   | sf_3 | 10534 | U01329.1   | Helicobacter pylori                                                                 |
| Proteobacteria | Helicobacteraceae   | sf_3 | 10572 | AF057163.1 | Helicobacter sp                                                                     |
| Proteobacteria | Unclassified        | sf_1 | 10497 | AY261811.1 | UASB reactor granular sludge clone PD-UASB-2 proteobacterium                        |
| Proteobacteria | Helicobacteraceae   | sf_3 | 10614 | AJ431216.1 | strain isolate str. BH180-49                                                        |
| Proteobacteria | Helicobacteraceae   | sf_3 | 10417 | AY216452.1 | temperate estuarine mud clone KM61                                                  |
| Proteobacteria | Unclassified        | sf_1 | 7808  | AY221081.1 | Mammoth cave clone CCU25                                                            |
| Proteobacteria | Unclassified        | sf_1 | 8023  | AF293006.1 | ferromanganous micronodule clone MND1                                               |
| Proteobacteria | Enterobacteriaceae  | sf_1 | 8886  | AF170176.1 | Salmonella typhimurium LT2 str. SGSC1412                                            |
| Proteobacteria | Enterobacteriaceae  | sf_1 | 8554  | AJ627202.1 | Kluyvera ascorbata 69                                                               |
| Proteobacteria | Enterobacteriaceae  | sf_1 | 8885  | AB089246.1 | Morganella morganii str. AP28                                                       |
| Proteobacteria | Enterobacteriaceae  | sf_1 | 9363  | AF025365.1 | Citrobacter freundii str. CDC 621-64                                                |
| Proteobacteria | Enterobacteriaceae  | sf_1 | 8934  | AF373188.1 | Pectobacterium subsp. carotovorum str. E155 subsp.                                  |
| Proteobacteria | Enterobacteriaceae  | sf_1 | 9060  | AJ853891.1 | Enterobacter ludwigii str. EN-119 = DSMZ 16688                                      |
| Proteobacteria | Enterobacteriaceae  | sf_1 | 8510  | AJ233420.1 | Klebsiella pneumoniae str. DSM 30104                                                |
| Proteobacteria | Enterobacteriaceae  | sf_1 | 8473  | M59155.1   | Hafnia alvei                                                                        |
| Proteobacteria | Helicobacteraceae   | sf_3 | 10411 | AB089112.2 | termite gut homogenate clone Rs-P71 proteobacterium                                 |
| Proteobacteria | Helicobacteraceae   | sf_3 | 10590 | AB089113.1 | termite gut homogenate clone Rs-H40 proteobacterium                                 |
| Proteobacteria | Sphingomonadaceae   | sf_1 | 6650  | AY563441.1 | Sphingomonas phyllosphaerae str. FA1                                                |
| Proteobacteria | Nitrosomonadaceae   | sf_1 | 8145  | AY123795.1 | Nitrosomonas eutropha str. Nm57                                                     |
| Proteobacteria | Comamonadaceae      | sf_1 | 8012  | AJ420325.1 | Acidovorax konjaci str. DSM 7481                                                    |
| Proteobacteria | Oxalobacteraceae    | sf_1 | 8158  | AB006750.1 | 2-HNA producing isolate MC13289                                                     |
| Proteobacteria | Unclassified        | sf_1 | 7832  |            |                                                                                     |
| Proteobacteria | Shewanellaceae      | sf_1 | 9081  | AB059264.1 | Shewanella sp. str. MTW-1                                                           |
| Proteobacteria | Aeromonadaceae      | sf_1 | 8621  | AF427150.1 | Aeromonas sp. PAR2A                                                                 |

|                |                     |      |       |             |                                                                          |
|----------------|---------------------|------|-------|-------------|--------------------------------------------------------------------------|
| Proteobacteria | Enterobacteriaceae  | sf_1 | 8974  | U92197.1    | Salmonella subsp. enterica serovar Agona str. Sa1 subsp.                 |
| Proteobacteria | Enterobacteriaceae  | sf_1 | 9361  | AB004747.1  | Enterobacter intermedius str. JCM1238                                    |
| Proteobacteria | Enterobacteriaceae  | sf_1 | 8529  | AF181574.1  | Raoultella planticola 7                                                  |
| Proteobacteria | Enterobacteriaceae  | sf_1 | 8892  | U93263.1    | Aranicola proteolyticus                                                  |
| Proteobacteria | Polyangiaceae       | sf_3 | 9735  | AJ518790.1  | uranium mining waste pile clone JG37-AG-15 proteobacterium               |
| Proteobacteria | Unclassified        | sf_1 | 9678  | AF523883.1  | coal effluent wetland clone RCP185                                       |
| Proteobacteria | Azospirillaceae     | sf_1 | 7539  | AJ401217.1  | Rhodocista sp. AR2107                                                    |
| Proteobacteria | Unclassified        | sf_1 | 7264  | AF508112.1  | Bosea thiooxidans TJ1                                                    |
| Proteobacteria | Phyllobacteriaceae  | sf_1 | 7300  | AY007683.1  | marine isolate JP57                                                      |
| Proteobacteria | Bartonellaceae      | sf_1 | 7415  | NC_005955.1 | Bartonella quintana str. Toulouse                                        |
| Proteobacteria | Rhodobacteraceae    | sf_1 | 6888  | AF254109.1  | hydrothermal vent strain str. TB66                                       |
| Proteobacteria | Rhodobacteraceae    | sf_1 | 7040  | D32238.1    | Paracoccus alcaliphilus str. JCM 7364                                    |
| Proteobacteria | Rhodobacteraceae    | sf_1 | 6991  | X53853.1    | Rhodobacter sphaeroides str. 2.4.1                                       |
| Proteobacteria | SAR11               | sf_2 | 7043  | AF353223.1  | marine clone Arctic95D-8                                                 |
| Proteobacteria | Unclassified        | sf_1 | 6653  | AY785128.1  | Kaistobacter koreensis str. PB229                                        |
| Proteobacteria | Neisseriaceae       | sf_1 | 8092  | AF487709.1  | Neisseria dentiae str. V33                                               |
| Proteobacteria | Rhodocyclaceae      | sf_1 | 8127  | AJ505852.1  | Zoogloea resiniphila str. PIV-3A2y                                       |
| Proteobacteria | Comamonadaceae      | sf_1 | 7986  | AF468446.1  | Arctic sea ice ARK10281                                                  |
| Proteobacteria | Burkholderiaceae    | sf_1 | 7914  | AB021422.1  | Burkholderia andropogonis str. ATCC 19311T                               |
| Proteobacteria | Unclassified        | sf_1 | 8839  | AJ400349.1  | f cytometric sorted marine sample subpopulation 3 clone ZD0408 bacterium |
| Proteobacteria | Xanthomonadaceae    | sf_3 | 9167  | AB074619.1  | pea aphid symbiont clone APe4_38                                         |
| Proteobacteria | Pseudomonadaceae    | sf_1 | 9049  | AJ296559.1  | uranium mining mill tailing clone GR-Sh2-34 GR-Sh2-34                    |
| Proteobacteria | Unclassified        | sf_3 | 9044  | AF420370.1  | hydrothermal sediment clone AF420370                                     |
| Proteobacteria | Alteromonadaceae    | sf_1 | 9222  | X82132.1    | Shewanella hanedai str. CIP 103207T                                      |
| Proteobacteria | Alteromonadaceae    | sf_1 | 8916  | U91545.1    | Shewanella algae str. 43940                                              |
| Proteobacteria | Unclassified        | sf_3 | 9367  | AF387348.1  | USA: Pacific Ocean seawater Naha Vents Hawaii isolate str. PV-4          |
| Proteobacteria | Pasteurellaceae     | sf_1 | 9263  | M75067.1    | Actinobacillus capsulatus                                                |
| Proteobacteria | Enterobacteriaceae  | sf_1 | 9151  |             |                                                                          |
| Proteobacteria | Enterobacteriaceae  | sf_1 | 9385  | AY264673.1  | Australiococcus greville symbiont                                        |
| Proteobacteria | Desulfomicrobiaceae | sf_1 | 10370 | AF030438.1  | Desulfomicrobium baculatum str. X; VKM B-1378; DSM 4                     |
| Proteobacteria | Polyangiaceae       | sf_3 | 10309 | AJ233947.1  | Nannocystis exedens str. Na e571                                         |
| Proteobacteria | Desulfobacteraceae  | sf_5 | 9777  | AY197376.1  | Guaymas Basin hydrothermal vent sediments clone B01R004                  |
| Proteobacteria | Helicobacteraceae   | sf_3 | 10425 | AB088432.1  | Sulfurimonas autotrophica str. OK5                                       |
| Proteobacteria | Desulfobacteraceae  | sf_5 | 9940  | AY177800.1  | Antarctic sediment clone SB2_56                                          |
| Proteobacteria | Rhodobacteraceae    | sf_1 | 7084  | AF359546.1  | Scrippsiella trochoidea NEPCC 15                                         |
| Proteobacteria | Caedibacteraceae    | sf_3 | 7010  | AJ428412.1  | periodontal pocket clone 10B6                                            |
| Proteobacteria | Shewanellaceae      | sf_1 | 8581  | AB008796.1  | Shewanella benthica str. DB21MT-2                                        |
| Proteobacteria | Vibrionaceae        | sf_1 | 8798  | AF172840.1  | Vibrio aestuarianus str. KT0901                                          |
| Proteobacteria | Vibrionaceae        | sf_1 | 8888  | AJ845014.1  | Vibrio aestuarianus str. 01/151                                          |
| Proteobacteria | Enterobacteriaceae  | sf_1 | 8742  | AF084835.1  | USA:New York isolate str. KN4                                            |
| Proteobacteria | Enterobacteriaceae  | sf_6 | 8783  | AF075271.2  | Alterococcus agarolyticus str. ADT3; CCRC17102                           |
| Proteobacteria | Enterobacteriaceae  | sf_1 | 9358  | U92194.1    | Salmonella subsp. enterica serovar Waycross str. Swy1 subsp.             |
| Proteobacteria | Enterobacteriaceae  | sf_1 | 9496  |             |                                                                          |
| Proteobacteria | Enterobacteriaceae  | sf_1 | 9651  | AF373176.1  | Pectobacterium subsp. atrosepticum str. GSPB 1710                        |

|                |                     |      |       |            |                                                                                          |
|----------------|---------------------|------|-------|------------|------------------------------------------------------------------------------------------|
| Proteobacteria | Enterobacteriaceae  | sf_1 | 8379  | AF289542.1 | Erwinia amylovora EA G-5                                                                 |
| Proteobacteria | Enterobacteriaceae  | sf_1 | 9142  | AJ233410.1 | Erwinia amylovora str. DSM 30165                                                         |
| Proteobacteria | Enterobacteriaceae  | sf_1 | 9345  | AF141891.1 | Erwinia amylovora str. BC199(=Ea528)                                                     |
| Proteobacteria | Enterobacteriaceae  | sf_1 | 8758  | U80201.1   | Pectobacterium cyripedii str. ATCC 29267                                                 |
| Proteobacteria | Unclassified        | sf_1 | 8430  | AF029226.1 | Salmonella bongori str. JEO 4162                                                         |
| Proteobacteria | Enterobacteriaceae  | sf_1 | 8693  | AF130912.1 | Pantoea agglomerans str. A40                                                             |
| Proteobacteria | Enterobacteriaceae  | sf_1 | 9302  | AF373198.1 | Pantoea subsp. stewartii str. GSPB 2626                                                  |
| Proteobacteria | Enterobacteriaceae  | sf_1 | 8624  | AF476105.1 | Erium globosum symbiont                                                                  |
| Proteobacteria | Enterobacteriaceae  | sf_1 | 8505  | AJ233406.1 | Buttiauxella warmboldiae str. DSM 9404                                                   |
| Proteobacteria | Enterobacteriaceae  | sf_1 | 8528  | Y17665.1   | Enterobacter cloacae Nr. 3                                                               |
| Proteobacteria | Enterobacteriaceae  | sf_1 | 8530  | AJ489826.1 | Enterobacteriaceae CF01Ent-1                                                             |
| Proteobacteria | Enterobacteriaceae  | sf_1 | 8640  |            |                                                                                          |
| Proteobacteria | Enterobacteriaceae  | sf_1 | 8936  | AF543283.1 | Klebsiella oxytoca str. ChDC OS31                                                        |
| Proteobacteria | Enterobacteriaceae  | sf_1 | 9274  | AJ550468.1 | Enterobacter sp. CC1                                                                     |
| Proteobacteria | Enterobacteriaceae  | sf_1 | 9390  | Z96077.1   | Enterobacter nimipressuralis str. LMG 10245-T                                            |
| Proteobacteria | Enterobacteriaceae  | sf_1 | 8251  | AF214640.1 | Nitrogen-fixing isolate str. CANF3                                                       |
| Proteobacteria | Enterobacteriaceae  | sf_1 | 8890  | X93216.1   | Raoultella planticola str. DR3                                                           |
| Proteobacteria | Enterobacteriaceae  | sf_1 | 8773  |            |                                                                                          |
| Proteobacteria | Enterobacteriaceae  | sf_1 | 8711  | AJ233432.1 | Serratia odorifera str. DSM 4582                                                         |
| Proteobacteria | Enterobacteriaceae  | sf_1 | 8712  | AJ233434.1 | Serratia proteamaculans str. DSM 4543                                                    |
| Proteobacteria | Enterobacteriaceae  | sf_1 | 9417  | AJ233429.1 | Serratia fonticola str. DSM 4576                                                         |
| Proteobacteria | Enterobacteriaceae  | sf_1 | 8631  | AF476108.1 | Planococcus ficus symbiont                                                               |
| Proteobacteria | Enterobacteriaceae  | sf_1 | 9265  | AY253919.1 | Rahnella aquatilis k 8                                                                   |
| Proteobacteria | Unclassified        | sf_6 | 6665  | AF143830.1 | hydrocarbon-degrading consortium clone 4-Org2-22                                         |
| Proteobacteria | Sphingomonadaceae   | sf_1 | 7535  | D16144.1   | Sphingomonas paucimobilis str. GIFU2395                                                  |
| Proteobacteria | Neisseriaceae       | sf_1 | 8143  | AY005029.1 | subgingival dental plaque clone AK105                                                    |
| Proteobacteria | Unclassified        | sf_1 | 7750  | AJ518782.1 | uranium mining waste pile near<br>Johanngeorgenstadt soil clone JG37-AG-35               |
| Proteobacteria | Comamonadaceae      | sf_1 | 7928  | AY218738.1 | penguin droppings sediments clone KD5-43                                                 |
| Proteobacteria | Comamonadaceae      | sf_1 | 7919  | AB021339.1 | strain isolate str. rM4                                                                  |
| Proteobacteria | Comamonadaceae      | sf_1 | 7987  | AB076844.1 | Acidovorax sp. str. OS-6                                                                 |
| Proteobacteria | Unclassified        | sf_1 | 7879  |            |                                                                                          |
| Proteobacteria | Unclassified        | sf_1 | 7766  |            |                                                                                          |
| Proteobacteria | Unclassified        | sf_1 | 7818  | AJ534623.1 | soil sample uranium mining waste pile near town<br>Johanngeorgenstadt clone JG36-TzT-215 |
| Proteobacteria | Burkholderiaceae    | sf_1 | 8011  | U96941.1   | proteobacterium                                                                          |
| Proteobacteria | Unclassified        | sf_4 | 8169  | AF523886.1 | Burkholderia graminis str. AUS35                                                         |
| Proteobacteria | Xanthomonadaceae    | sf_3 | 9277  | AY188327.1 | forested wetland clone RCP2-54                                                           |
| Proteobacteria | Legionellaceae      | sf_1 | 8836  | CR628336.1 | penguin droppings sediment clone KD8-68                                                  |
| Proteobacteria | Unclassified        | sf_1 | 9008  | AF361092.1 | Legionella pneumophila str. Paris                                                        |
| Proteobacteria | Oceanospirillaceae  | sf_1 | 8596  | AF353238.1 | activated sludge clone SBRQ157                                                           |
| Proteobacteria | Aeromonadaceae      | sf_1 | 8340  | X71120.1   | marine clone Arctic95B-7                                                                 |
| Proteobacteria | Aeromonadaceae      | sf_1 | 8364  | S39232.1   | Aeromonas ichthiosmia                                                                    |
| Proteobacteria | Aeromonadaceae      | sf_1 | 9026  | AJ009860.1 | Aeromonas allosaccharophila str. CECT 4199                                               |
| Proteobacteria | Aeromonadaceae      | sf_1 | 9440  | X60412.1   | Haemophilus piscium str. NCIMB 1952                                                      |
| Proteobacteria | Pasteurellaceae     | sf_1 | 9477  | AY613549.1 | Aeromonas sobria str. NCIMB 12065                                                        |
| Proteobacteria | Pasteurellaceae     | sf_1 | 9604  | AF224286.1 | Haemophilus influenzae str. M11105                                                       |
| Proteobacteria | Desulfovibrionaceae | sf_1 | 10212 |            | Mannheimia sp. MCCM 00145                                                                |
| Proteobacteria | Polyangiaceae       | sf_3 | 9671  | AF420357.1 | hydrothermal sediment clone AF420357                                                     |
| Proteobacteria | Unclassified        | sf_4 | 9884  | AF523885.1 | forested wetland clone RCP2-62                                                           |
| Proteobacteria | Geobacteraceae      | sf_1 | 9956  | AF523968.1 | forested wetland clone FW140                                                             |

|                |                                  |       |       |            |                                                                                    |
|----------------|----------------------------------|-------|-------|------------|------------------------------------------------------------------------------------|
| Proteobacteria | Desulfobacteraceae               | sf_5  | 10364 | AY771936.1 | marine surface sediment clone SB2                                                  |
| Proteobacteria | Desulfobacteraceae               | sf_5  | 9818  | AY216453.1 | temperate estuarine mud clone KM62                                                 |
| Proteobacteria | Unclassified                     | sf_28 | 10091 |            |                                                                                    |
| Proteobacteria | Unclassified                     | sf_1  | 10384 | AF367484.1 | deep-sea hydrothermal vent clone VC1.2-cl06                                        |
| Proteobacteria | Unclassified                     | sf_1  | 10405 | AF420346.1 | hydrothermal sediment clone AF420346                                               |
| Proteobacteria | Unclassified                     | sf_1  | 10414 | AY218582.1 | penguin droppings sediments clone KD2-34                                           |
| Proteobacteria | Unclassified                     | sf_9  | 244   | AY093483.1 | deep marine sediment clone MB-C2-152                                               |
| Proteobacteria | Sphingomonadaceae                | sf_1  | 7215  | AF445712.1 | travertine hot spring clone SM2B06                                                 |
| Proteobacteria | Rhodocyclaceae                   | sf_1  | 8052  | AY032610.1 | Dechloromonas aromatica str. RCB                                                   |
| Proteobacteria | Methylococcaceae                 | sf_1  | 8645  | AF307138.1 | Methylomicrobium buryatense str. 5B                                                |
| Proteobacteria | Desulfobacteraceae               | sf_5  | 10031 | AY177795.1 | Antarctic sediment clone SB1_49                                                    |
| Proteobacteria | Acetobacteraceae                 | sf_1  | 6637  | X74066.1   | Acetobacter acetii str. NCIB8621 DSM3508                                           |
| Proteobacteria | Unclassified                     | sf_1  | 7109  | AY189753.1 | diesel-polluted Bohai Gulf isolate str. M-5 M-5                                    |
| Proteobacteria | Beijerinck/Rhodoplan/Methylocyst | sf_3  | 7401  | AF359545.1 | Scrippsiella trochoidea NEPCC 15                                                   |
| Proteobacteria | Unclassified                     | sf_6  | 7207  |            |                                                                                    |
| Proteobacteria | Unclassified                     | sf_6  | 7647  |            |                                                                                    |
| Proteobacteria | Xanthobacteraceae                | sf_1  | 6971  | AY177367.2 | Thiobacillus sp. str. 104                                                          |
| Proteobacteria | Unclassified                     | sf_1  | 7067  | AB033757.1 | Blastochloris sulfoviridis str. GN1                                                |
| Proteobacteria | Bradyrhizobiaceae                | sf_1  | 6768  | M59068.1   | Rhodopseudomonas palustris str. GH                                                 |
| Proteobacteria | Bradyrhizobiaceae                | sf_1  | 6636  | U35000.3   | Bradyrhizobium elkanii str. USDA 76                                                |
| Proteobacteria | Bradyrhizobiaceae                | sf_1  | 6867  | AY102327.1 | heavy metal-contaminated soil clone a13131                                         |
| Proteobacteria | Bradyrhizobiaceae                | sf_1  | 7126  | AJ534670.1 | ground water deep-well injection disposal site                                     |
|                |                                  |       |       |            | radioactive wastes Tomsk-7 clone S15A-MN96                                         |
|                |                                  |       |       |            | proteobacterium                                                                    |
|                |                                  |       |       |            | Bradyrhizobium sp. str. KK114                                                      |
| Proteobacteria | Bradyrhizobiaceae                | sf_1  | 7522  | AF509906.1 |                                                                                    |
| Proteobacteria | Rhizobiaceae                     | sf_1  | 7457  |            |                                                                                    |
| Proteobacteria | Rhizobiaceae                     | sf_1  | 6798  | AF508099.1 | Agrobacterium tumefaciens TG14                                                     |
| Proteobacteria | Rhodobacteraceae                 | sf_1  | 7125  | AB006899.1 | Paracoccus carotinifaciens str. E-396                                              |
| Proteobacteria | Rickettsiaceae                   | sf_1  | 6831  |            |                                                                                    |
| Proteobacteria | Sphingomonadaceae                | sf_1  | 7528  | D16145.1   | Sphingobium yanoikuyae str. GIFU9882                                               |
| Proteobacteria | Sphingomonadaceae                | sf_1  | 7016  | AY167834.1 | Sphingomonas sp. str. SAFR-027                                                     |
| Proteobacteria | Sphingomonadaceae                | sf_1  | 7537  | AY250869.1 | lichen-dominated Antarctic cryptoendolithic community clone FBP255 proteobacterium |
| Proteobacteria | Unclassified                     | sf_6  | 6987  |            |                                                                                    |
| Proteobacteria | Sphingomonadaceae                | sf_1  | 7075  | AJ000920.2 | Novosphingobium sp. str. K16                                                       |
| Proteobacteria | Methylophilaceae                 | sf_1  | 7892  | AB193725.1 | Methylophilus leisingeri str. DSM 6813                                             |
| Proteobacteria | Unclassified                     | sf_17 | 7819  |            |                                                                                    |
| Proteobacteria | Nitrosomonadaceae                | sf_1  | 7976  | AY123798.1 | Nitrosomonas sp. str. Nm86                                                         |
| Proteobacteria | Rhodocyclaceae                   | sf_1  | 7951  | AF502233.1 | EBPR sludge lab scale clone HP1A03                                                 |
| Proteobacteria | Comamonadaceae                   | sf_1  | 7949  | AF508103.1 | Variovorax paradoxus TG27                                                          |
| Proteobacteria | Comamonadaceae                   | sf_1  | 8152  | AJ543434.1 | nephridia Octolasion lacteum clone OI2-2                                           |
| Proteobacteria | Ectothiorhodospiraceae           | sf_1  | 9450  | AJ318526.1 | Halorhodospira neutrophila str. SG 3304                                            |
| Proteobacteria | Ectothiorhodospiraceae           | sf_1  | 9598  | AF507818.1 | Mono Lake at depth 2 m station 6 July 2000 clone ML602J-47 proteobacterium         |
|                |                                  |       |       |            | Thiorhodovibrio winogradskyi                                                       |
| Proteobacteria | Chromatiaceae                    | sf_1  | 8408  | Y12368.2   | Calyptogena magnifica symbiont                                                     |
| Proteobacteria | Unclassified                     | sf_3  | 8961  | M99446.1   | Methylophaga sp. str. V4.ME.29 = MM_2343                                           |
| Proteobacteria | Piscirickettsiaceae              | sf_3  | 9392  | AJ244761.1 | uranium mining waste pile clone JG37-AG-94                                         |
| Proteobacteria | Unclassified                     | sf_1  | 9458  | AJ518786.1 | proteobacterium                                                                    |
|                |                                  |       |       |            | penguin droppings sediments clone KD8-80                                           |
| Proteobacteria | Xanthomonadaceae                 | sf_3  | 9211  | AY218694.1 |                                                                                    |
| Proteobacteria | Unclassified                     | sf_3  | 9269  |            |                                                                                    |
| Proteobacteria | Unclassified                     | sf_8  | 8247  |            |                                                                                    |
| Proteobacteria | Halomonadaceae                   | sf_1  | 8317  | AF211861.1 | Chromohalobacter canadensis str. DSM6769                                           |

|                |                    |      |       |            |                                                                                    |
|----------------|--------------------|------|-------|------------|------------------------------------------------------------------------------------|
| Proteobacteria | Halomonadaceae     | sf_1 | 8598  | X92417.1   | Halomonas desiderata str. FB2                                                      |
| Proteobacteria | Moraxellaceae      | sf_3 | 8565  | Z93454.1   | Acinetobacter sp. str. 942 Group BJ17                                              |
| Proteobacteria | Pseudomonadaceae   | sf_1 | 9588  | AF530072.1 | Pseudomonas citronellolis str. TERIDB18                                            |
| Proteobacteria | Pseudomonadaceae   | sf_1 | 8263  |            |                                                                                    |
| Proteobacteria | Pseudomonadaceae   | sf_1 | 8635  |            |                                                                                    |
| Proteobacteria | Unclassified       | sf_1 | 8323  | AF420363.1 | hydrothermal sediment clone AF420363                                               |
| Proteobacteria | Unclassified       | sf_3 | 9582  |            |                                                                                    |
| Proteobacteria | Unclassified       | sf_1 | 8483  | AJ002006.1 | Rheinheimera baltica str. OS140 Baltic # 166                                       |
| Proteobacteria | Alteromonadaceae   | sf_1 | 8695  | AF468296.1 | Arctic pack ice; northern Fram Strait; 80 31.1 N; 01 deg 59.7 min E clone ARKIA-34 |
| Proteobacteria | Alteromonadaceae   | sf_1 | 8904  | AB059263.1 | psychrophile deep-sea sediment south-western Pacific isolate str. PS12-4 PS12-4    |
| Proteobacteria | Alteromonadaceae   | sf_1 | 9586  | AY190533.1 | Shewanella gaetbuli str. TF-27                                                     |
| Proteobacteria | Vibrionaceae       | sf_1 | 8999  | AY292944.1 | Photobacterium leiognathi str. LN101                                               |
| Proteobacteria | Vibrionaceae       | sf_1 | 8665  | AY257975.1 | Vibrio gallicus str. CIP 107867; HT 3-3                                            |
| Proteobacteria | Vibrionaceae       | sf_1 | 8267  | AJ491290.1 | Vibrio pomeroyi str. LMG 20537                                                     |
| Proteobacteria | Aeromonadaceae     | sf_1 | 9000  | AF170914.4 | Aeromonas culicicola str. MTCC 3249                                                |
| Proteobacteria | Aeromonadaceae     | sf_1 | 9494  | AY532691.1 | Aeromonas molluscorum str. 849T                                                    |
| Proteobacteria | Pasteurellaceae    | sf_1 | 8308  | M75039.1   | Haemophilus actinomycetemcomitans                                                  |
| Proteobacteria | Enterobacteriaceae | sf_1 | 9391  |            |                                                                                    |
| Proteobacteria | Enterobacteriaceae | sf_1 | 8740  | AF373201.1 | Erwinia chrysanthemi str. 573                                                      |
| Proteobacteria | Enterobacteriaceae | sf_1 | 9252  | AF130971.1 | Pantoea cedenensis str. A34                                                        |
| Proteobacteria | Enterobacteriaceae | sf_1 | 9202  | AF189697.1 | Activated sludge isolate str. BC55                                                 |
| Proteobacteria | Enterobacteriaceae | sf_1 | 9594  | AB089244.1 | Morganella morganii str. ATCC35200                                                 |
| Proteobacteria | Enterobacteriaceae | sf_1 | 8590  | AJ010486.1 | Enterobacter pyrinus str. KCTC2520                                                 |
| Proteobacteria | Enterobacteriaceae | sf_1 | 9420  |            |                                                                                    |
| Proteobacteria | Enterobacteriaceae | sf_1 | 9266  | Z14096.1   | Parasite BEV of E.variegatus                                                       |
| Proteobacteria | Enterobacteriaceae | sf_1 | 9348  |            |                                                                                    |
| Proteobacteria | Enterobacteriaceae | sf_1 | 9368  | AJ233424.1 | Pragia fontium str. DSM 5563                                                       |
| Proteobacteria | Enterobacteriaceae | sf_1 | 9029  | AY280573.1 | Photorhabdus asymbiotica subsp. australis str. MB                                  |
| Proteobacteria | Enterobacteriaceae | sf_1 | 9262  | AJ871363.1 | Yersinia aldovae str. A125                                                         |
| Proteobacteria | Bdellovibrionaceae | sf_1 | 10010 | AJ518802.1 | uranium mining waste pile clone JG37-AG-139 proteobacterium                        |
| Proteobacteria | Polyangiaceae      | sf_3 | 10082 | AJ518792.1 | uranium mining waste pile clone JG37-AG-33 proteobacterium                         |
| Proteobacteria | Unclassified       | sf_9 | 9760  | AY093467.1 | deep marine sediment clone MB-A2-137                                               |
| Proteobacteria | Unclassified       | sf_9 | 9993  |            |                                                                                    |
| Proteobacteria | Polyangiaceae      | sf_4 | 9733  | AF382143.1 | bacterioplankton clone ZA3735c                                                     |
| Proteobacteria | Desulfobulbaceae   | sf_1 | 10097 | AB100004.1 | inactive deep-sea hydrothermal vent chimneys clone IndB2-42                        |
| Proteobacteria | Desulfobacteraceae | sf_5 | 10267 | AJ535249.1 | marine sediment above hydrate ridge clone Hyd89-61 proteobacterium                 |
| Proteobacteria | Desulfobacteraceae | sf_5 | 9939  | AF354163.1 | marine methane seep clone 1427                                                     |
| Proteobacteria | Desulfobacteraceae | sf_5 | 10136 | AY197382.1 | Guaymas Basin hydrothermal vent sediments clone B01R011                            |
| Proteobacteria | Unclassified       | sf_1 | 10622 |            |                                                                                    |
| Proteobacteria | Unclassified       | sf_1 | 10473 | U29081.1   | Rimicaris exoculata ectosymbiont                                                   |
| Proteobacteria | Helicobacteraceae  | sf_3 | 10612 | AJ441209.1 | hydrothermal vent polychaete mucous clone P. palm C/A 64                           |
| Proteobacteria | Campylobacteraceae | sf_3 | 10563 | AF144694.2 | Campylobacter sp. str. DSM 806                                                     |
| Proteobacteria | Campylobacteraceae | sf_3 | 10549 | AF497805.1 | Campylobacter upsaliensis str. LMG 8850                                            |
| SPAM           | Unclassified       | sf_1 | 705   | AJ519639.1 | uranium tailings soil clone Sh765B-AG-45                                           |
| SPAM           | Unclassified       | sf_1 | 738   | AJ532725.1 | uranium mining waste clone JG34-KF-252                                             |



|                       |                           |      |      |             |                                                                |
|-----------------------|---------------------------|------|------|-------------|----------------------------------------------------------------|
| Spirochaetes          | Spirochaetaceae           | sf_1 | 6479 | Y08893.1    | Treponema sp                                                   |
| Spirochaetes          | Spirochaetaceae           | sf_1 | 6580 | AF056341.1  | Treponema sp. str. III:C:BA213                                 |
| Spirochaetes          | Spirochaetaceae           | sf_1 | 6562 | AF523928.1  | forested wetland clone RCP1-96                                 |
| Spirochaetes          | Spirochaetaceae           | sf_1 | 6488 | AF093251.1  | Treponema primitia str. ZAS-1                                  |
| Spirochaetes          | Spirochaetaceae           | sf_1 | 6491 | AB062840.1  | termite gut homogenate clone BCf8-03                           |
| Spirochaetes          | Spirochaetaceae           | sf_1 | 6508 | X89050.1    | termite hindgut clone mpsp2                                    |
| Spirochaetes          | Spirochaetaceae           | sf_1 | 6523 | AB088912.1  | termite gut homogenate clone Rs-J64 sp.                        |
| Spirochaetes          | Leptospiraceae            | sf_3 | 6496 | NC_005823.1 | Leptospira interrogans serovar Copenhageni str. Fiocruz L1-130 |
| Spirochaetes          | Spirochaetaceae           | sf_1 | 6476 | AB084965.1  | termite gut clone NkS50                                        |
| Spirochaetes          | Spirochaetaceae           | sf_1 | 6490 | AB062823.1  | termite gut homogenate clone BCf4-14                           |
| Spirochaetes          | Spirochaetaceae           | sf_1 | 6568 | AJ419821.1  | Spirochaeta sp                                                 |
| Spirochaetes          | Spirochaetaceae           | sf_3 | 6558 | AF166259.1  | Spirochaeta culicis str. BR91                                  |
| Spirochaetes          | Spirochaetaceae           | sf_1 | 6526 | AY230217.1  | Treponema sp. str. 7CPL208                                     |
| Spirochaetes          | Spirochaetaceae           | sf_1 | 6571 | AJ458946.1  | Mixotricha paradoxa is flagellate hindgut                      |
| Spirochaetes          | Spirochaetaceae           | sf_1 | 6502 | AF139203.1  | Mastotermes darwiniensis clone mp4 of                          |
| Spirochaetes          | Spirochaetaceae           | sf_1 | 6532 | AB084963.1  | Treponema denticola str. ATCC35405                             |
| Spirochaetes          | Spirochaetaceae           | sf_1 | 6459 | AJ431240.1  | termite gut clone NkS39                                        |
| Spirochaetes          | Spirochaetaceae           | sf_1 | 6506 | AB088911.1  | Spirochaeta sp. str. BH180-158                                 |
| Spirochaetes          | Spirochaetaceae           | sf_1 | 6575 | AY133079.1  | termite gut homogenate clone Rs-J58 sp.                        |
| Spirochaetes          | Spirochaetaceae           | sf_1 | 6583 | AB088875.1  | TCE-contaminated site clone ccslm226                           |
| Spirochaetes          | Spirochaetaceae           | sf_1 | 6554 | AB088889.1  | termite gut homogenate clone Rs-J42 sp.                        |
| Spirochaetes          | Spirochaetaceae           | sf_1 | 6458 | AB084961.1  | termite gut homogenate clone Rs-A43 sp.                        |
| Spirochaetes          | Spirochaetaceae           | sf_1 | 6494 | AB088890.1  | termite gut clone NkS34                                        |
| Spirochaetes          | Spirochaetaceae           | sf_1 | 6489 | AJ458944.1  | termite gut homogenate clone Rs-C47 sp.                        |
| Spirochaetes          | Spirochaetaceae           | sf_1 | 6565 | AB085166.1  | Mixotricha paradoxa is flagellate hindgut                      |
| Spirochaetes          | Spirochaetaceae           | sf_1 | 6579 | AB084968.1  | Mastotermes darwiniensis clone mp1 of                          |
| Spirochaetes          | Spirochaetaceae           | sf_1 | 6507 | AB085161.1  | termite gut clone NkS-Oxy25                                    |
| Spirochaetes          | Spirochaetaceae           | sf_1 | 6529 | AB062806.1  | termite gut clone NkS83                                        |
| Spirochaetes          | Spirochaetaceae           | sf_1 | 6557 | AF454308.1  | termite gut clone NkS-Ste2                                     |
| Spirochaetes          | Spirochaetaceae           | sf_1 | 6460 | AB088907.1  | termite gut homogenate clone BCf10-21                          |
| Spirochaetes          | Spirochaetaceae           | sf_1 | 6465 | AF357917.2  | spirochete clone ML320J-13                                     |
| SR1                   | Unclassified              | sf_1 | 2900 |             | termite gut homogenate clone Rs-B69 sp.                        |
| Synergistes           | Unclassified              | sf_3 | 117  | AB089065.2  | Spirochaeta sp. str. Grapes                                    |
| Synergistes           | Unclassified              | sf_3 | 353  | AY261810.1  | termite gut homogenate clone Rs-D89                            |
| Synergistes           | Unclassified              | sf_3 | 719  | AY207056.1  | UASB reactor granular sludge clone PD-UASB-13 G+C              |
| Synergistes           | Unclassified              | sf_3 | 60   | AF481216.1  | Synergistes sp. P1 str. P4G_18                                 |
| Synergistes           | Unclassified              | sf_3 | 740  | AF371930.1  | Flexistipes sp. str. E3_33                                     |
| Thermodesulfobacteria | Thermodesulfobacteriaceae | sf_1 | 667  | AF411013.1  | swine intestine clone p-4292-4Wa3                              |
| Thermotogae           | Thermotogaceae            | sf_4 | 51   | AJ419874.1  | Geothermobacterium ferrireducens                               |
| TM6                   | Unclassified              | sf_1 | 9803 | AF507715.1  | Thermosiphon sp. str. MV1063                                   |
| TM7                   | Unclassified              | sf_1 | 8155 | AY134895.1  | forest soil clone S1204                                        |
| TM7                   | Unclassified              | sf_1 | 5177 |             | oral periodontitis clone EW086                                 |
| TM7                   | Unclassified              | sf_1 | 2697 | AJ576410.1  | midgut homogenate Pachnoda ehippiata larva clone PeM47         |
| TM7                   | Unclassified              | sf_1 | 3145 | AF385520.1  | tongue dorsa clone DR034                                       |
| TM7                   | Unclassified              | sf_1 | 3679 |             |                                                                |
| TM7                   | Unclassified              | sf_1 | 2917 | AF507686.1  | arid soil clone C026                                           |
| TM7                   | Unclassified              | sf_1 | 3151 | AF513102.1  | activated sludge foam clone 71                                 |
| TM7                   | Unclassified              | sf_1 | 3025 |             |                                                                |

|                 |                               |        |       |            |                                                                |
|-----------------|-------------------------------|--------|-------|------------|----------------------------------------------------------------|
| TM7             | Unclassified                  | sf_1   | 5061  |            |                                                                |
| TM7             | Unclassified                  | sf_1   | 8040  | AY005446.1 | oral cavity clone BE109                                        |
| Unclassified    | Unclassified                  | sf_160 | 226   |            |                                                                |
| Unclassified    | Unclassified                  | sf_160 | 6430  |            |                                                                |
| Unclassified    | Unclassified                  | sf_95  | 2545  | AB106352.1 | anaerobic sludge isolate str. JE                               |
| Unclassified    | Unclassified                  | sf_160 | 6456  |            |                                                                |
| Unclassified    | Unclassified                  | sf_140 | 6355  |            |                                                                |
| Unclassified    | Unclassified                  | sf_160 | 10012 |            |                                                                |
| Unclassified    | Unclassified                  | sf_106 | 243   | AF027097.1 | hot spring clone OPB25                                         |
| Unclassified    | Unclassified                  | sf_93  | 925   | AF254404.1 | 4MB-degrading consortium clone UASB_TL26                       |
| Unclassified    | Unclassified                  | sf_160 | 4410  |            |                                                                |
| Unclassified    | Unclassified                  | sf_160 | 485   | AY193179.1 | thermal spring mat clone O1aA90                                |
| Unclassified    | Unclassified                  | sf_160 | 333   |            |                                                                |
| Unclassified    | Unclassified                  | sf_160 | 651   |            |                                                                |
| Unclassified    | Unclassified                  | sf_160 | 6360  |            |                                                                |
| Unclassified    | Unclassified                  | sf_160 | 7767  |            |                                                                |
| Unclassified    | Unclassified                  | sf_160 | 1914  |            |                                                                |
| Unclassified    | Unclassified                  | sf_34  | 4668  |            |                                                                |
| Unclassified    | Unclassified                  | sf_156 | 4291  | AF507892.1 | Mono Lake at depth 35m station 6 July 2000 clone ML635J-21 G+C |
| Unclassified    | Unclassified                  | sf_160 | 2488  |            |                                                                |
| Unclassified    | Unclassified                  | sf_160 | 7444  |            |                                                                |
| Unclassified    | Unclassified                  | sf_105 | 1995  |            |                                                                |
| Verrucomicrobia | Xiphinematobacteraceae        | sf_3   | 888   | AF217462.1 | Candidatus Xiphinematobacter brevicolli                        |
| Verrucomicrobia | Unclassified                  | sf_3   | 486   | AJ401113.1 | Elbe river clone DEV045                                        |
| Verrucomicrobia | Unclassified                  | sf_5   | 686   | AF419674.1 | Guaymas Basin hydrothermal sediment clone a2b018               |
| Verrucomicrobia | Unclassified                  | sf_4   | 288   | U60012.1   | Prostheco bacter dejongeeii                                    |
| Verrucomicrobia | Verrucomicrobia subdivision 5 | sf_1   | 547   | AY114329.1 | anoxic marine sediment clone LD1-PB1                           |
| Verrucomicrobia | Unclassified                  | sf_3   | 792   | AB089122.1 | termite gut homogenate clone Rs-P07 bacterium                  |
| Verrucomicrobia | Verrucomicrobia subdivision 7 | sf_1   | 446   | AY114322.1 | anoxic marine sediment clone LD1-PA34                          |
| Verrucomicrobia | Verrucomicrobia subdivision 5 | sf_1   | 533   | AY114330.1 | anoxic marine sediment clone LD1-PB12                          |
| Verrucomicrobia | Verrucomicrobia subdivision 5 | sf_1   | 530   | AY114334.1 | anoxic marine sediment clone LD1-PB20                          |
| Verrucomicrobia | Verrucomicrobia subdivision 7 | sf_1   | 559   | AY114314.1 | anoxic marine sediment clone LD1-PA20                          |
| Verrucomicrobia | Verrucomicrobia subdivision 7 | sf_1   | 760   | AF454310.2 | Mono lake clone ML316M-1                                       |
| Verrucomicrobia | Verrucomicrobia subdivision 5 | sf_1   | 629   | AY114328.1 | anoxic marine sediment clone LD1-PA50                          |
| Verrucomicrobia | Unclassified                  | sf_3   | 40    | AJ401121.1 | Elbe river clone DEV055                                        |
| Verrucomicrobia | Verrucomicrobia subdivision 5 | sf_1   | 885   | AJ390455.1 | soil clone PBS-III-26                                          |
| Verrucomicrobia | Unclassified                  | sf_3   | 11    | AF234711.1 | sludge clone H2                                                |
| Verrucomicrobia | Verrucomicrobiaceae           | sf_6   | 613   | AJ441222.1 | hydrothermal vent polychaete mucous clone P. palm C 85         |
| Verrucomicrobia | Verrucomicrobiaceae           | sf_6   | 203   | AY271254.1 | Akkermansia muciniphila                                        |
| Verrucomicrobia | Verrucomicrobiaceae           | sf_6   | 871   |            |                                                                |
| Verrucomicrobia | Verrucomicrobiaceae           | sf_1   | 1024  | AY244959.1 | rumen clone BS5                                                |
| Verrucomicrobia | Verrucomicrobiaceae           | sf_7   | 29    | AB073978.1 | Fucophilus fuccoidanolyticus str. SI-1234                      |
| Verrucomicrobia | Unclassified                  | sf_4   | 169   | AY114317.1 | anoxic marine sediment clone LD1-PA26                          |
| WS3             | Unclassified                  | sf_1   | 2537  | AY114325.1 | anoxic marine sediment clone LD1-PA39                          |
| WS3             | Unclassified                  | sf_3   | 95    | AJ535231.1 | marine sediment above hydrate ridge clone Hyd24-32             |
| WS5             | Unclassified                  | sf_2   | 8119  | AF419661.1 | Guaymas Basin hydrothermal sediment clone a2b013               |

**Table S2. Bacterial taxa detected in significantly altered abundance in CRS patient versus healthy subject sinuses.**

| Phylum         | Family                           | SF    | Taxon ID | prokMSA Name                                                    | T value | P value | Q value |
|----------------|----------------------------------|-------|----------|-----------------------------------------------------------------|---------|---------|---------|
| Actinobacteria | Corynebacteriaceae               | sf_1  | 1493     | Corynebacterium tuberculostearicum str. CIP102346               | -2.652  | 0.034   | 0.003   |
| TM7            | Unclassified                     | sf_1  | 5177     |                                                                 | 2.289   | 0.045   | 0.004   |
| Acidobacteria  | Acidobacteriaceae                | sf_14 | 208      | uranium mill tailings soil sample clone GuBH2-AD-9 sp.          | 2.348   | 0.039   | 0.003   |
| Proteobacteria | Beijerinck/Rhodoplan/Methylocyst | sf_3  | 7401     | Scrippsiella trochoidea NEPCC 15                                | 2.362   | 0.047   | 0.004   |
| Actinobacteria | Corynebacteriaceae               | sf_1  | 1820     | Corynebacterium jeikeium str. ATCC 43734                        | 2.367   | 0.049   | 0.004   |
| Proteobacteria | Enterobacteriaceae               | sf_1  | 8173     | Photorhabdus asymbiotica str. ATCC 43949                        | 2.375   | 0.041   | 0.003   |
| Actinobacteria | Microbacteriaceae                | sf_1  | 1241     | Microbacterium kitamiense CV88                                  | 2.378   | 0.043   | 0.003   |
| Firmicutes     | Aerococcaceae                    | sf_1  | 3553     | Desemzia incerta str. DSM 20581                                 | 2.388   | 0.036   | 0.003   |
| Actinobacteria | Pseudonocardiaceae               | sf_1  | 1863     |                                                                 | 2.405   | 0.044   | 0.004   |
| Firmicutes     | Bacillaceae                      | sf_1  | 3439     | Bacillus siralis str. 171544                                    | 2.428   | 0.034   | 0.003   |
| Proteobacteria | Enterobacteriaceae               | sf_1  | 8504     | Dysmicoccus neobrevipes symbiont                                | 2.465   | 0.042   | 0.003   |
| Proteobacteria | Neisseriaceae                    | sf_1  | 7662     | Mars Odyssey Orbiter and encapsulation facility clone T5-1 sp.  | 2.468   | 0.035   | 0.003   |
| Actinobacteria | Pseudonocardiaceae               | sf_1  | 1402     |                                                                 | 2.469   | 0.045   | 0.004   |
| Actinobacteria | Rubrobacteraceae                 | sf_1  | 1901     | earthworm burrow isolate B33D1                                  | 2.486   | 0.046   | 0.004   |
| Actinobacteria | Frankiaceae                      | sf_1  | 1644     | Frankia sp. M16467                                              | 2.501   | 0.042   | 0.003   |
| Proteobacteria | Pseudomonadaceae                 | sf_1  | 8508     | Pseudomonas citronellolis str. TERIDB26                         | 2.515   | 0.044   | 0.004   |
| Cyanobacteria  | Chloroplasts                     | sf_5  | 5006     |                                                                 | 2.517   | 0.030   | 0.002   |
| Firmicutes     | Lachnospiraceae                  | sf_5  | 2961     | termite gut homogenate clone Rs-F92 bacterium                   | 2.518   | 0.029   | 0.002   |
| Proteobacteria | Unclassified                     | sf_3  | 9367     | USA: Pacific Ocean seawater Naha Vents Hawaii isolate str. PV-4 | 2.521   | 0.037   | 0.003   |

|                |                     |       |      |                                                                       |       |       |       |
|----------------|---------------------|-------|------|-----------------------------------------------------------------------|-------|-------|-------|
| Bacteroidetes  | Crenotrichaceae     | sf_11 | 6143 | Toolik Lake main station at 3 m depth clone TLM09/TLMdgge12a          | 2.541 | 0.032 | 0.003 |
| Actinobacteria | Frankiaceae         | sf_1  | 1161 | Frankia sp. MRn2-2                                                    | 2.547 | 0.028 | 0.002 |
| Cyanobacteria  | Chloroplasts        | sf_13 | 5000 | Mitrastema yamamotoi                                                  | 2.566 | 0.027 | 0.002 |
| Actinobacteria | Mycobacteriaceae    | sf_1  | 1175 | Mycobacterium cf. xenopi 'Hymi_Wue Tb_939/99' str. Hymi_Wue Tb_939/99 | 2.574 | 0.036 | 0.003 |
| Proteobacteria | Piscirickettsiaceae | sf_3  | 8664 | Thiomicrospira sp. str. Milos-T2                                      | 2.597 | 0.031 | 0.003 |
| Proteobacteria | Alteromonadaceae    | sf_1  | 9288 | Alteromonas stellipolaris str. LMG 21861                              | 2.597 | 0.033 | 0.003 |
| Firmicutes     | Unclassified        | sf_1  | 4293 | termite gut homogenate clone Rs-Q01 bacterium                         | 2.600 | 0.025 | 0.002 |
| Actinobacteria | Nocardiaceae        | sf_1  | 1769 | Nocardia sp. str. DSM 46067                                           | 2.618 | 0.029 | 0.002 |
| Firmicutes     | Bacillaceae         | sf_1  | 3661 | Bacillus sp. str. 2216.25.2                                           | 2.626 | 0.025 | 0.002 |
| Bacteroidetes  | Flavobacteriaceae   | sf_1  | 5589 |                                                                       | 2.638 | 0.034 | 0.003 |
| Actinobacteria | Actinomycetaceae    | sf_1  | 1227 | Actinomyces naeslundii                                                | 2.639 | 0.031 | 0.003 |
| Firmicutes     | Bacillaceae         | sf_1  | 283  | Geobacillus thermocatenulatus str. DSM 730                            | 2.640 | 0.029 | 0.002 |
| Firmicutes     | Bacillaceae         | sf_1  | 3894 | Sporosarcina macmurdoensis str. CMS 21w                               | 2.645 | 0.023 | 0.002 |
| Firmicutes     | Bacillaceae         | sf_1  | 3635 | Bacillus aeolius str. 4-1                                             | 2.650 | 0.023 | 0.002 |
| Proteobacteria | Enterobacteriaceae  | sf_1  | 8236 | Vryburgia amaryllidis symbiont                                        | 2.654 | 0.023 | 0.002 |
| Proteobacteria | Bradyrhizobiaceae   | sf_1  | 7353 | temperate estuarine mud clone HC65                                    | 2.670 | 0.025 | 0.002 |
| Actinobacteria | Rubrobacteraceae    | sf_1  | 1739 |                                                                       | 2.678 | 0.021 | 0.002 |
| Bacteroidetes  | Unclassified        | sf_15 | 5355 | DCP-dechlorinating consortium clone SHA-5                             | 2.682 | 0.022 | 0.002 |
| Proteobacteria | Alteromonadaceae    | sf_1  | 9292 |                                                                       | 2.691 | 0.028 | 0.002 |
| Proteobacteria | Methylophilaceae    | sf_1  | 7892 | Methylophilus leisingeri str. DSM 6813                                | 2.696 | 0.029 | 0.002 |
| Actinobacteria | Micrococcaceae      | sf_1  | 2019 | Micrococcus luteus str. HN2-11                                        | 2.706 | 0.028 | 0.002 |

|                |                      |       |      |                                                                       |       |       |       |
|----------------|----------------------|-------|------|-----------------------------------------------------------------------|-------|-------|-------|
| Actinobacteria | Nocardiaceae         | sf_1  | 1834 | <i>Nocardia transvalensis</i> str. DSM 43405                          | 2.713 | 0.031 | 0.003 |
| Firmicutes     | Unclassified         | sf_17 | 602  |                                                                       | 2.725 | 0.020 | 0.002 |
| Actinobacteria | Nocardiaceae         | sf_1  | 1432 | <i>Nocardia veterana</i> str. DSM 44445                               | 2.726 | 0.030 | 0.002 |
| NC10           | Unclassified         | sf_1  | 536  | uranium mill tailings clone GuBH2-AD-8                                | 2.735 | 0.021 | 0.002 |
| Actinobacteria | Dietziaceae          | sf_1  | 1872 | <i>Dietzia maris</i>                                                  | 2.736 | 0.031 | 0.003 |
| Actinobacteria | Streptosporangiaceae | sf_1  | 1158 | <i>Streptosporangium roseum</i> str. DSM43021T                        | 2.739 | 0.032 | 0.003 |
| Actinobacteria | Microbacteriaceae    | sf_1  | 1106 |                                                                       | 2.743 | 0.025 | 0.002 |
| Proteobacteria | Unclassified         | sf_8  | 8247 |                                                                       | 2.743 | 0.032 | 0.003 |
| Proteobacteria | Rhodobacteraceae     | sf_1  | 7084 | <i>Scrippsiella trochoidea</i> NEPCC 15                               | 2.747 | 0.028 | 0.002 |
| Proteobacteria | Methylococcaceae     | sf_1  | 8645 | <i>Methylococcum buryatense</i> str. 5B                               | 2.748 | 0.025 | 0.002 |
| Firmicutes     | Bacillaceae          | sf_1  | 3283 | <i>Bacillus niacini</i> str. IFO15566                                 | 2.754 | 0.021 | 0.002 |
| Proteobacteria | Desulfobionaceae     | sf_1  | 9826 | termite gut homogenate clone Rs-M72 proteobacterium                   | 2.757 | 0.020 | 0.002 |
| Actinobacteria | Nocardiaceae         | sf_1  | 1261 | <i>Nocardia caishijiensis</i> str. F829                               | 2.757 | 0.027 | 0.002 |
| Actinobacteria | Streptosporangiaceae | sf_1  | 1189 | <i>Streptosporangium subroseum</i> str. 7113                          | 2.771 | 0.031 | 0.003 |
| Bacteroidetes  | Sphingobacteriaceae  | sf_1  | 5913 | Sphingobacteriaceae str. Ellin160                                     | 2.786 | 0.018 | 0.002 |
| Firmicutes     | Lachnospiraceae      | sf_5  | 4501 | crevicular epithelial cells clone BU014                               | 2.786 | 0.018 | 0.002 |
| Proteobacteria | Caedibacteraceae     | sf_3  | 7010 | periodontal pocket clone 10B6                                         | 2.796 | 0.018 | 0.002 |
| Bacteroidetes  | Crenotrichaceae      | sf_11 | 5463 | <i>Flexibacter sancti</i> str. IFO 16034                              | 2.807 | 0.018 | 0.002 |
| Bacteroidetes  | Flexibacteraceae     | sf_19 | 5372 |                                                                       | 2.807 | 0.022 | 0.002 |
| Bacteroidetes  | Unclassified         | sf_15 | 5783 | Mono Lake at depth 35 m station 6 July 2000 clone ML635J-15 bacterium | 2.823 | 0.019 | 0.002 |
| Proteobacteria | Alteromonadaceae     | sf_1  | 8753 | <i>Idiomarina loihiensis</i> str. GSP37                               | 2.831 | 0.026 | 0.002 |

|                |                     |      |      |                                                            |       |       |       |
|----------------|---------------------|------|------|------------------------------------------------------------|-------|-------|-------|
| Firmicutes     | Lachnospiraceae     | sf_5 | 3089 | Ruminococcus obeum                                         | 2.839 | 0.016 | 0.001 |
| Proteobacteria | Alteromonadaceae    | sf_1 | 8174 | attached marine recovered surface clone 17 proteobacterium | 2.844 | 0.023 | 0.002 |
| Proteobacteria | Xanthomonadaceae    | sf_3 | 8983 | Iron oxidising strain ES-1                                 | 2.856 | 0.016 | 0.001 |
| Firmicutes     | Lachnospiraceae     | sf_5 | 3059 | Butyrivibrio fibrisolvens str. NCDO 2249                   | 2.858 | 0.016 | 0.001 |
| Actinobacteria | Microbacteriaceae   | sf_1 | 1804 | Microbacterium resistens str. 2002-59119                   | 2.859 | 0.023 | 0.002 |
| Actinobacteria | Microbacteriaceae   | sf_1 | 1779 | Microbacterium sp. str. VKM Ac-2048                        | 2.864 | 0.024 | 0.002 |
| Proteobacteria | Enterobacteriaceae  | sf_1 | 8607 | Amonotherium lichtensioides symbiont                       | 2.867 | 0.022 | 0.002 |
| Proteobacteria | Oceanospirillaceae  | sf_1 | 8596 | marine clone Arctic95B-7                                   | 2.879 | 0.027 | 0.002 |
| Actinobacteria | Cellulomonadaceae   | sf_1 | 1240 | Cellulomonadaceae str. WB9                                 | 2.887 | 0.025 | 0.002 |
| Actinobacteria | Nocardioideae       | sf_1 | 1854 | Aeromicrobium marinum str. T2                              | 2.888 | 0.022 | 0.002 |
| Proteobacteria | Piscirickettsiaceae | sf_3 | 9557 | Riftia pachyptila's tube clone R76-B23                     | 2.892 | 0.019 | 0.002 |
| Proteobacteria | Unclassified        | sf_3 | 8230 |                                                            | 2.914 | 0.019 | 0.002 |
| Dictyoglomi    | Dictyoglomaceae     | sf_9 | 7579 | marine clone Arctic96B-6                                   | 2.914 | 0.018 | 0.002 |
| Proteobacteria | Rhodocyclaceae      | sf_1 | 7800 | sample taken upstream landfill clone BVC77 landfill        | 2.915 | 0.021 | 0.002 |
| Proteobacteria | Succinivibrionaceae | sf_1 | 8822 | Anaerobiospirillum sp. str. 3J102                          | 2.917 | 0.026 | 0.002 |
| Proteobacteria | Enterobacteriaceae  | sf_1 | 9266 | Parasite BEV of E.variegatus                               | 2.930 | 0.020 | 0.002 |
| Proteobacteria | Shewanellaceae      | sf_1 | 8662 |                                                            | 2.932 | 0.023 | 0.002 |
| Actinobacteria | Rubrobacteraceae    | sf_1 | 1551 | soil isolate Ellin301                                      | 2.932 | 0.020 | 0.002 |
| Actinobacteria | Microbacteriaceae   | sf_1 | 1404 | freshwater isolate str. MWH-Ta3                            | 2.935 | 0.021 | 0.002 |
| Actinobacteria | Unclassified        | sf_3 | 1201 | sponge clone TK39                                          | 2.936 | 0.021 | 0.002 |
| Proteobacteria | Ralstoniaceae       | sf_1 | 7778 | Ralstonia insidiosa str. CCUG 46388                        | 2.937 | 0.014 | 0.001 |

|                |                     |       |       |                                                                          |       |       |       |
|----------------|---------------------|-------|-------|--------------------------------------------------------------------------|-------|-------|-------|
| Proteobacteria | Alteromonadaceae    | sf_1  | 8975  | Alteromonas sp. str. NIBH P1M3                                           | 2.956 | 0.022 | 0.002 |
| Firmicutes     | Clostridiaceae      | sf_12 | 206   | termite gut homogenate clone Rs-P50 bacterium                            | 2.961 | 0.015 | 0.001 |
| Actinobacteria | Actinomycetaceae    | sf_1  | 2049  | Arcanobacterium haemolyticum str. CIP 103370                             | 2.965 | 0.019 | 0.002 |
| Planctomycetes | Anammoxales         | sf_4  | 9662  | Great Artesian Basin clone B83                                           | 2.988 | 0.012 | 0.001 |
| Proteobacteria | Alteromonadaceae    | sf_1  | 9324  | Pseudoalteromonas ruthenica str. KMM300                                  | 2.991 | 0.024 | 0.002 |
| Proteobacteria | Alteromonadaceae    | sf_1  | 9501  | sea water isolate str. BP-PH                                             | 2.992 | 0.019 | 0.002 |
| Proteobacteria | Unclassified        | sf_6  | 7207  |                                                                          | 2.994 | 0.021 | 0.002 |
| Proteobacteria | Rhodocyclaceae      | sf_1  | 7956  |                                                                          | 2.997 | 0.014 | 0.001 |
| Chloroflexi    | Unclassified        | sf_2  | 818   |                                                                          | 2.998 | 0.016 | 0.001 |
| Proteobacteria | Enterobacteriaceae  | sf_1  | 9252  | Pantoea cedenensis str. A34                                              | 2.999 | 0.020 | 0.002 |
| Firmicutes     | Bacillaceae         | sf_1  | 3836  | Geobacillus stearothermophilus str. 46                                   | 3.001 | 0.016 | 0.001 |
| Nitrospira     | Nitrospiraceae      | sf_1  | 864   | nitrifying sludge clone GC86                                             | 3.005 | 0.018 | 0.002 |
| Firmicutes     | Bacillaceae         | sf_1  | 3492  | Bacillus subtilis str. IAM 12118T                                        | 3.009 | 0.014 | 0.001 |
| Spirochaetes   | Spirochaetaceae     | sf_1  | 6575  | TCE-contaminated site clone ccsIm226                                     | 3.014 | 0.013 | 0.001 |
| Actinobacteria | Microbacteriaceae   | sf_1  | 1098  |                                                                          | 3.017 | 0.015 | 0.001 |
| Bacteroidetes  | Prevotellaceae      | sf_1  | 5718  | Prevotella tanneriae str. 29-1                                           | 3.023 | 0.014 | 0.001 |
| Proteobacteria | Polyangiaceae       | sf_3  | 10249 | soil sample uranium mining waste pile clone JG36-TzT-168 proteobacterium | 3.033 | 0.011 | 0.001 |
| Firmicutes     | Lachnospiraceae     | sf_5  | 2834  | Butyrivibrio fibrisolvens str. OB156                                     | 3.034 | 0.012 | 0.001 |
| Proteobacteria | Alteromonadaceae    | sf_1  | 8172  | Pseudoalteromonas sp. str. Bdeep-1                                       | 3.034 | 0.020 | 0.002 |
| Proteobacteria | Unclassified        | sf_1  | 7879  |                                                                          | 3.034 | 0.016 | 0.001 |
| Actinobacteria | Thermomonosporaceae | sf_1  | 1546  | Actinomadura fulvescens str. DSM 43923T                                  | 3.044 | 0.020 | 0.002 |

|                |                       |       |       |                                                      |       |       |       |
|----------------|-----------------------|-------|-------|------------------------------------------------------|-------|-------|-------|
| Proteobacteria | Enterobacteriaceae    | sf_1  | 8283  | Heteropsylla texana symbiont                         | 3.054 | 0.018 | 0.002 |
| Proteobacteria | Enterobacteriaceae    | sf_1  | 9151  |                                                      | 3.065 | 0.019 | 0.002 |
| Proteobacteria | Unclassified          | sf_3  | 9124  | 10e-6 dilution marine clone DC8-80-1 proteobacterium | 3.071 | 0.013 | 0.001 |
| Actinobacteria | Gordoniaceae          | sf_1  | 1567  |                                                      | 3.074 | 0.016 | 0.001 |
| Proteobacteria | Shewanellaceae        | sf_1  | 8641  | Moritella abyssi str. 2693                           | 3.081 | 0.017 | 0.001 |
| Bacteroidetes  | Crenotrichaceae       | sf_11 | 6249  | Haliscomenobacter hydrossis                          | 3.089 | 0.010 | 0.001 |
| Proteobacteria | Alteromonadaceae      | sf_1  | 9384  | Moritella viscosa str. NVI 88/478T                   | 3.093 | 0.017 | 0.001 |
| Firmicutes     | Clostridiaceae        | sf_12 | 252   | termite gut homogenate clone Rs-A28 bacterium        | 3.094 | 0.012 | 0.001 |
| Firmicutes     | Peptostreptococcaceae | sf_5  | 1037  | Finegoldia magna                                     | 3.102 | 0.010 | 0.001 |
| Firmicutes     | Bacillaceae           | sf_1  | 3550  | Bacillus megaterium str. QM B1551                    | 3.102 | 0.014 | 0.001 |
| Firmicutes     | Peptostreptococcaceae | sf_5  | 616   | Peptoniphilus lacrimalis str. CCUG 31350             | 3.102 | 0.010 | 0.001 |
| Proteobacteria | Desulfovibrionaceae   | sf_1  | 10262 | Desulfovibrio sp. str. Ac5.2                         | 3.103 | 0.015 | 0.001 |
| Firmicutes     | Clostridiaceae        | sf_12 | 4551  | Clostridium acetobutylicum str. ATCC 824 (T)         | 3.133 | 0.013 | 0.001 |
| Proteobacteria | Alteromonadaceae      | sf_1  | 8579  | Psychromonas profunda str. 2825                      | 3.134 | 0.017 | 0.001 |
| Proteobacteria | Unclassified          | sf_1  | 8432  |                                                      | 3.137 | 0.018 | 0.002 |
| Proteobacteria | Unclassified          | sf_17 | 7819  |                                                      | 3.140 | 0.013 | 0.001 |
| Actinobacteria | Streptosporangiaceae  | sf_1  | 1587  | Nonomurea subsp. roseoviolacea str. SF 2303          | 3.140 | 0.019 | 0.002 |
| Firmicutes     | Lachnospiraceae       | sf_5  | 3076  | Clostridium nexile                                   | 3.142 | 0.012 | 0.001 |
| Proteobacteria | Oxalobacteraceae      | sf_1  | 8034  | Janthinobacterium agaricidamnosum str. W1r3T         | 3.151 | 0.014 | 0.001 |
| Actinobacteria | Intrasporangiaceae    | sf_1  | 1674  | Janibacter terrae str. DSM 13953T                    | 3.170 | 0.011 | 0.001 |
| Proteobacteria | Moraxellaceae         | sf_3  | 9359  | Acinetobacter junii str. S33                         | 3.172 | 0.016 | 0.001 |



|                  |                        |       |       |                                                 |       |       |       |
|------------------|------------------------|-------|-------|-------------------------------------------------|-------|-------|-------|
| Crenarchaeota    | Unclassified           | sf_1  | 2587  | hydrothermal vent clone p1VWA11                 | 3.172 | 0.009 | 0.001 |
| Proteobacteria   | Pseudoalteromonadaceae | sf_1  | 9627  | Pseudoalteromonas sp                            | 3.172 | 0.016 | 0.001 |
| Deinococcus-Ther | Unclassified           | sf_3  | 920   |                                                 | 3.180 | 0.009 | 0.001 |
| Proteobacteria   | Alteromonadaceae       | sf_1  | 8932  | Pseudoalteromonas antarctica str. N-1           | 3.190 | 0.018 | 0.002 |
| Proteobacteria   | Alteromonadaceae       | sf_1  | 9205  | marine clone Arctic96B-17                       | 3.196 | 0.013 | 0.001 |
| Firmicutes       | Clostridiaceae         | sf_12 | 4299  | termite gut clone Rs-L02                        | 3.205 | 0.010 | 0.001 |
| Proteobacteria   | Pasteurellaceae        | sf_1  | 9477  | Haemophilus influenzae str. M11105              | 3.206 | 0.008 | 0.001 |
| Proteobacteria   | Pseudomonadaceae       | sf_1  | 8725  | Pseudomonas sp. str. 2N1-1                      | 3.208 | 0.017 | 0.001 |
| Proteobacteria   | Moraxellaceae          | sf_3  | 8368  | Pseudoalteromonas mariniglutinosa str. KMM 3635 | 3.213 | 0.017 | 0.001 |
| Gemmatimonadete  | Unclassified           | sf_5  | 10112 | forest soil clone NOS7.157WL                    | 3.217 | 0.014 | 0.001 |
| Proteobacteria   | Alteromonadaceae       | sf_1  | 9364  | Pseudoalteromonas prydzensis str. MB8-11        | 3.217 | 0.017 | 0.001 |
| Proteobacteria   | Alteromonadaceae       | sf_1  | 8970  | Arctic seawater isolate str. R9879              | 3.220 | 0.016 | 0.001 |
| Proteobacteria   | Unclassified           | sf_1  | 8962  | bacterioplankton clone AEGEAN_234               | 3.220 | 0.011 | 0.001 |
| Actinobacteria   | Actinomycetaceae       | sf_1  | 1672  | Actinomyces odontolyticus str. CCUG 28084       | 3.220 | 0.014 | 0.001 |
| Proteobacteria   | Enterobacteriaceae     | sf_1  | 8700  | Baumannia cicadellinicola                       | 3.221 | 0.012 | 0.001 |
| Proteobacteria   | Anaplasmataceae        | sf_3  | 7481  | Wolbachia pipientis                             | 3.226 | 0.009 | 0.001 |
| Nitrospira       | Nitrospiraceae         | sf_2  | 542   | forested wetland clone FW19                     | 3.227 | 0.009 | 0.001 |
| Proteobacteria   | Pseudomonadaceae       | sf_1  | 9219  | Pseudomonas cf. monteillii 9                    | 3.229 | 0.016 | 0.001 |
| Chlorobi         | Unclassified           | sf_8  | 5822  | Saltmarsh mud clone K-790                       | 3.231 | 0.009 | 0.001 |
| Firmicutes       | Peptostreptococcaceae  | sf_5  | 861   | Peptoniphilus sp. str. 2002-2300004             | 3.235 | 0.008 | 0.001 |
| Acidobacteria    | Unclassified           | sf_1  | 87    | activated sludge clone 2951                     | 3.235 | 0.008 | 0.001 |

|                 |                         |       |      |                                                         |       |       |       |
|-----------------|-------------------------|-------|------|---------------------------------------------------------|-------|-------|-------|
| Firmicutes      | Bacillaceae             | sf_1  | 3820 | Bacillus subtilis str. KL-120                           | 3.237 | 0.008 | 0.001 |
| Proteobacteria  | Pseudomonadaceae        | sf_1  | 8553 | Pseudomonas fulva str. IAM 1587                         | 3.237 | 0.016 | 0.001 |
| Actinobacteria  | Coriobacteriaceae       | sf_1  | 1800 | Tomsk-7 clone S15A-MN100                                | 3.238 | 0.009 | 0.001 |
| Firmicutes      | Peptococc/Acidaminococc | sf_11 | 863  | Dialister invisus str. E7_25                            | 3.239 | 0.012 | 0.001 |
| Proteobacteria  | Alcaligenaceae          | sf_1  | 7984 | Waste-gas biofilter clone Blfciii38                     | 3.240 | 0.015 | 0.001 |
| Proteobacteria  | Chromatiaceae           | sf_1  | 8409 | human colonic mucosal biopsy clone ABLCf1               | 3.249 | 0.017 | 0.001 |
| Proteobacteria  | Alteromonadaceae        | sf_1  | 9218 | Pseudoalteromonas haloplanktis str. ATCC 14393          | 3.249 | 0.017 | 0.001 |
| Firmicutes      | Unclassified            | sf_1  | 894  | coal tar waste-contaminated groundwater clone 36-22 G+C | 3.251 | 0.013 | 0.001 |
| Verrucomicrobia | Xiphinematobacteraceae  | sf_3  | 888  | Candidatus Xiphinematobacter brevicolli                 | 3.251 | 0.010 | 0.001 |
| Firmicutes      | Peptostreptococcaceae   | sf_5  | 2913 | termite gut homogenate clone Rs-N82 bacterium           | 3.255 | 0.008 | 0.001 |
| Bacteroidetes   | Crenotrichaceae         | sf_11 | 6123 | Flexibacter japonensis str. IFO 16041                   | 3.259 | 0.010 | 0.001 |
| Proteobacteria  | Phyllobacteriaceae      | sf_1  | 7009 |                                                         | 3.261 | 0.008 | 0.001 |
| Proteobacteria  | Alteromonadaceae        | sf_1  | 8695 | Arctic pack ice clone ARKIA-34                          | 3.264 | 0.014 | 0.001 |
| Verrucomicrobia | Unclassified            | sf_4  | 288  | Prostheco bacter de jonegeii                            | 3.276 | 0.009 | 0.001 |
| Proteobacteria  | Alteromonadaceae        | sf_1  | 9143 | Pseudoalteromonas agarivorans str. KMM 255              | 3.293 | 0.016 | 0.001 |
| Firmicutes      | Peptostreptococcaceae   | sf_5  | 3153 | infirum str. W 1471                                     | 3.294 | 0.012 | 0.001 |
| Chlorobi        | Unclassified            | sf_6  | 5294 | Mammoth cave clone CCM9b                                | 3.304 | 0.010 | 0.001 |
| Firmicutes      | Lachnospiraceae         | sf_5  | 2825 | Butyrivibrio fibrisolvens str. LP1265                   | 3.306 | 0.008 | 0.001 |
| Proteobacteria  | Unclassified            | sf_5  | 6735 | Candidatus Pelagibacter ubique str. HTCC1002            | 3.309 | 0.013 | 0.001 |
| Chlamydiae      | Chlamydiaceae           | sf_1  | 4820 | Chlamydomphila pneumoniae str. AR39                     | 3.314 | 0.011 | 0.001 |
| Actinobacteria  | Unclassified            | sf_3  | 1296 | termite gut homogenate clone Rs-M66 bacterium           | 3.320 | 0.010 | 0.001 |

|                 |                               |       |       |                                                           |       |       |       |
|-----------------|-------------------------------|-------|-------|-----------------------------------------------------------|-------|-------|-------|
| Actinobacteria  | Streptomycetaceae             | sf_1  | 1436  | Streptomyces malaysiensis str. ATB-11                     | 3.321 | 0.014 | 0.001 |
| Proteobacteria  | Unclassified                  | sf_4  | 7105  | Mariana trough hydrothermal vent clone MT-NB25            | 3.322 | 0.007 | 0.001 |
| Proteobacteria  | Xanthomonadaceae              | sf_3  | 9320  | Waste-gas biofilter clone Blyi3                           | 3.324 | 0.007 | 0.001 |
| Verrucomicrobia | Verrucomicrobia subdivision 5 | sf_1  | 533   | anoxic marine sediment clone LD1-PB12                     | 3.327 | 0.010 | 0.001 |
| Firmicutes      | Sporolactobacillaceae         | sf_1  | 3879  | Lake Elmenteita isolate WE4                               | 3.332 | 0.007 | 0.001 |
| Proteobacteria  | Alteromonadaceae              | sf_1  | 8580  | Arctic seawater isolate str. R7076                        | 3.333 | 0.015 | 0.001 |
| Actinobacteria  | Microbacteriaceae             | sf_1  | 1667  | Microbacterium lacticum                                   | 3.333 | 0.010 | 0.001 |
| Bacteroidetes   | Rikenellaceae                 | sf_5  | 5947  | hydrothermal vent polychaete mucous clone P. palm C/A 221 | 3.334 | 0.012 | 0.001 |
| Proteobacteria  | Pasteurellaceae               | sf_1  | 8952  | Actinobacillus lignieresii                                | 3.336 | 0.014 | 0.001 |
| Chloroflexi     | Unclassified                  | sf_1  | 2370  | Dehalococcoides ethenogenes str. strain 195               | 3.340 | 0.009 | 0.001 |
| Bacteroidetes   | Unclassified                  | sf_15 | 5890  | penguin droppings sediments clone KD1-125                 | 3.345 | 0.009 | 0.001 |
| Proteobacteria  | Enterobacteriaceae            | sf_1  | 1206  | Dermacentor variabilis symbiont                           | 3.345 | 0.011 | 0.001 |
| Fusobacteria    | Fusobacteriaceae              | sf_3  | 120   | tongue dorsum scrapings clone FP036                       | 3.346 | 0.009 | 0.001 |
| Proteobacteria  | Unclassified                  | sf_3  | 9582  |                                                           | 3.348 | 0.011 | 0.001 |
| Firmicutes      | Peptostreptococcaceae         | sf_5  | 2805  | oral periodontitis clone FX033                            | 3.365 | 0.006 | 0.001 |
| Proteobacteria  | Pasteurellaceae               | sf_1  | 8555  | Haemophilus influenzae str. M9741                         | 3.367 | 0.013 | 0.001 |
| Proteobacteria  | Desulfovibrionaceae           | sf_1  | 10244 |                                                           | 3.371 | 0.007 | 0.001 |
| Proteobacteria  | Alteromonadaceae              | sf_1  | 9369  | Pseudoalteromonas luteoviolacea str. NCIMB 1893T          | 3.371 | 0.013 | 0.001 |
| Actinobacteria  | Coriobacteriaceae             | sf_1  | 1258  | ground water Tomsk-7 clone S15A-MN25                      | 3.371 | 0.015 | 0.001 |
| Firmicutes      | Halobacillaceae               | sf_1  | 3756  | Salibacillus sp. str. YIM-kkny16                          | 3.374 | 0.009 | 0.001 |
| Bacteroidetes   | Flexibacteraceae              | sf_19 | 6297  | EBPR sludge lab scale clone HP1A92                        | 3.382 | 0.008 | 0.001 |

|                |                   |       |      |                                                                   |       |       |       |
|----------------|-------------------|-------|------|-------------------------------------------------------------------|-------|-------|-------|
| Firmicutes     | Clostridiaceae    | sf_12 | 4587 | Clostridium botulinum str. 468; toxin type C                      | 3.396 | 0.006 | 0.001 |
| Proteobacteria | Unclassified      | sf_1  | 7993 | soil clone 1326-2                                                 | 3.399 | 0.011 | 0.001 |
| Proteobacteria | Alcaligenaceae    | sf_1  | 7737 | atrazine-catabolizing microbial presence methanol clone KRA30+06A | 3.400 | 0.013 | 0.001 |
| Proteobacteria | Alteromonadaceae  | sf_1  | 9640 | exposed to diatom detritus isolate str. Tw-10 Tw-10               | 3.400 | 0.014 | 0.001 |
| Proteobacteria | Oxalobacteraceae  | sf_1  | 7921 | Collimonas fungivorans str. Ter331                                | 3.403 | 0.010 | 0.001 |
| Proteobacteria | Moraxellaceae     | sf_3  | 8565 | Acinetobacter sp. str. 942 Group BJ17                             | 3.406 | 0.006 | 0.001 |
| Firmicutes     | Bacillaceae       | sf_1  | 3506 | Lake Nakuru isolate 18N1                                          | 3.412 | 0.006 | 0.001 |
| Acidobacteria  | Acidobacteriaceae | sf_14 | 6424 | sphagnum peat bog clone K-5b10                                    | 3.413 | 0.008 | 0.001 |
| Firmicutes     | Lachnospiraceae   | sf_5  | 2844 | Pseudobutyrvibrio ruminis str. pC-XS2                             | 3.421 | 0.006 | 0.001 |
| Firmicutes     | Paenibacillaceae  | sf_1  | 3651 | Paenibacillus borealis KK20                                       | 3.425 | 0.007 | 0.001 |
| Proteobacteria | Alcaligenaceae    | sf_1  | 7838 | Alcaligenes defragrans str. PD-19                                 | 3.427 | 0.012 | 0.001 |
| Proteobacteria | Pseudomonadaceae  | sf_1  | 9238 |                                                                   | 3.428 | 0.014 | 0.001 |
| Actinobacteria | Mycobacteriaceae  | sf_1  | 1365 | Mycobacterium chelonae str. CIP 104535T                           | 3.430 | 0.010 | 0.001 |
| Proteobacteria | Unclassified      | sf_3  | 8606 |                                                                   | 3.432 | 0.012 | 0.001 |
| Proteobacteria | Pseudomonadaceae  | sf_1  | 9343 | Cellvibrio subsp. mixtus str. ACM 2601                            | 3.436 | 0.012 | 0.001 |
| Proteobacteria | Pseudomonadaceae  | sf_1  | 9228 | Pseudomonas stutzeri HY-105                                       | 3.437 | 0.008 | 0.001 |
| Proteobacteria | Pseudomonadaceae  | sf_1  | 8344 | Anabaena circinalis AWQC118C isolate str. UNSW3                   | 3.438 | 0.014 | 0.001 |
| Proteobacteria | Rickettsiaceae    | sf_1  | 6831 |                                                                   | 3.440 | 0.007 | 0.001 |
| Proteobacteria | Alteromonadaceae  | sf_1  | 9058 | Pseudoalteromonas carrageenovora str. ATCC 12662T                 | 3.442 | 0.013 | 0.001 |
| Actinobacteria | Streptomycetaceae | sf_1  | 1375 | soil clone 228-1                                                  | 3.451 | 0.009 | 0.001 |
| Actinobacteria | Unclassified      | sf_3  | 1900 |                                                                   | 3.452 | 0.006 | 0.001 |

|                  |                         |       |      |                                                          |       |       |       |
|------------------|-------------------------|-------|------|----------------------------------------------------------|-------|-------|-------|
| Proteobacteria   | Rhodocyclaceae          | sf_1  | 7817 | TCE-contaminated site clone ccs265                       | 3.453 | 0.013 | 0.001 |
| Proteobacteria   | Alteromonadaceae        | sf_1  | 8904 | psychrophile deep-sea Pacific isolate str. PS12-4 PS12-4 | 3.460 | 0.011 | 0.001 |
| Proteobacteria   | Pseudomonadaceae        | sf_1  | 8687 | Pseudomonas putida str. ATCC 17472                       | 3.467 | 0.011 | 0.001 |
| Proteobacteria   | Pasteurellaceae         | sf_1  | 9237 |                                                          | 3.468 | 0.013 | 0.001 |
| Bacteroidetes    | Prevotellaceae          | sf_1  | 6066 | human mouth isolate str. P4P_62                          | 3.469 | 0.011 | 0.001 |
| Proteobacteria   | Alteromonadaceae        | sf_1  | 8336 | Alteromonas sp. str. MS23                                | 3.470 | 0.012 | 0.001 |
| Bacteroidetes    | Flammeovirgaceae        | sf_5  | 6084 | Microscilla arenaria str. IFO 15982                      | 3.471 | 0.008 | 0.001 |
| Firmicutes       | Clostridiaceae          | sf_12 | 2915 | Tepidibacter thalassicus str. SC 562                     | 3.473 | 0.006 | 0.001 |
| Firmicutes       | Peptococc/Acidaminococc | sf_11 | 940  | Veillonella dispar str. DSM 20735                        | 3.481 | 0.012 | 0.001 |
| Proteobacteria   | Azospirillaceae         | sf_1  | 7539 | Rhodocista sp. AR2107                                    | 3.484 | 0.006 | 0.001 |
| Proteobacteria   | Pasteurellaceae         | sf_1  | 9263 | Actinobacillus capsulatus                                | 3.487 | 0.013 | 0.001 |
| Proteobacteria   | Unclassified            | sf_6  | 6694 | forested wetland clone RCP2-92                           | 3.487 | 0.005 | 0.001 |
| Proteobacteria   | Anaplasmataceae         | sf_3  | 6628 | Wolbachia pipientis                                      | 3.489 | 0.007 | 0.001 |
| Firmicutes       | Streptococcaceae        | sf_1  | 3699 | Streptococcus agalactiae str. 2603V/R                    | 3.490 | 0.006 | 0.001 |
| Firmicutes       | Bacillaceae             | sf_1  | 3419 | Bacillus algicola str. KMM 3737                          | 3.492 | 0.006 | 0.001 |
| Bacteroidetes    | Unclassified            | sf_1  | 5951 | CFB group clone ML615J-4                                 | 3.493 | 0.010 | 0.001 |
| Proteobacteria   | Comamonadaceae          | sf_1  | 7965 | Anoxobacterium dechloraticum                             | 3.495 | 0.007 | 0.001 |
| Gemmatimonadetes | Unclassified            | sf_5  | 9464 | lodgepole pine rhizosphere soil                          | 3.495 | 0.010 | 0.001 |
| Proteobacteria   | Pasteurellaceae         | sf_1  | 8195 | Haemophilus influenzae str. R2866                        | 3.496 | 0.013 | 0.001 |
| Proteobacteria   | Comamonadaceae          | sf_1  | 7919 | strain isolate str. rM4                                  | 3.497 | 0.005 | 0.001 |
| Firmicutes       | Lachnospiraceae         | sf_5  | 3088 | Clostridium sphenoides str. DSM 632                      | 3.499 | 0.005 | 0.001 |

|                 |                               |       |       |                                                        |       |       |       |
|-----------------|-------------------------------|-------|-------|--------------------------------------------------------|-------|-------|-------|
| Proteobacteria  | Unclassified                  | sf_20 | 6763  |                                                        | 3.499 | 0.005 | 0.001 |
| Proteobacteria  | Oxalobacteraceae              | sf_1  | 7968  | Oxalobacter formigenes str. OXB ovinen rumen           | 3.499 | 0.008 | 0.001 |
| Verrucomicrobia | Verrucomicrobia subdivision 5 | sf_1  | 885   | soil clone PBS-III-26                                  | 3.501 | 0.007 | 0.001 |
| Acidobacteria   | Acidobacteriaceae             | sf_14 | 508   | uranium mining waste pile clone JG37-AG-81 sp.         | 3.508 | 0.005 | 0.001 |
| Proteobacteria  | Unclassified                  | sf_3  | 7974  |                                                        | 3.510 | 0.007 | 0.001 |
| Bacteroidetes   | Blattabacteriaceae            | sf_1  | 5828  | Blattabacterium species                                | 3.511 | 0.012 | 0.001 |
| Proteobacteria  | Burkholderiaceae              | sf_1  | 7914  | Burkholderia andropogonis str. ATCC 19311T             | 3.511 | 0.005 | 0.001 |
| Proteobacteria  | Pasteurellaceae               | sf_1  | 8228  | Actinobacillus indolicus str. H1419                    | 3.511 | 0.012 | 0.001 |
| Actinobacteria  | Acidimicrobiaceae             | sf_1  | 2014  | marine sediment clone MB-A2-100                        | 3.513 | 0.006 | 0.001 |
| Proteobacteria  | Pseudomonadaceae              | sf_1  | 9175  | Pseudomonas extremorientalis str. KMM3447              | 3.515 | 0.012 | 0.001 |
| Unclassified    | Unclassified                  | sf_34 | 4668  |                                                        | 3.516 | 0.005 | 0.001 |
| Proteobacteria  | Moraxellaceae                 | sf_3  | 9641  | Acinetobacter haemolyticus                             | 3.517 | 0.009 | 0.001 |
| Firmicutes      | Clostridiaceae                | sf_12 | 4169  |                                                        | 3.521 | 0.005 | 0.001 |
| Proteobacteria  | Pseudomonadaceae              | sf_1  | 8853  | Pseudomonas cichorii str. ATCC 10857T                  | 3.522 | 0.007 | 0.001 |
| Acidobacteria   | Unclassified                  | sf_1  | 500   | soil clone RB24                                        | 3.525 | 0.005 | 0.001 |
| Acidobacteria   | Unclassified                  | sf_1  | 435   | anaerobic VC-degrading enrichment clone VC47 bacterium | 3.527 | 0.006 | 0.001 |
| Proteobacteria  | Alteromonadaceae              | sf_1  | 8863  | Alteromonas marina str. SW-47                          | 3.527 | 0.008 | 0.001 |
| Proteobacteria  | Pseudomonadaceae              | sf_1  | 8852  | Pseudomonas stutzeri str. KC                           | 3.539 | 0.012 | 0.001 |
| Proteobacteria  | Unclassified                  | sf_1  | 8533  |                                                        | 3.545 | 0.008 | 0.001 |
| Firmicutes      | Unclassified                  | sf_4  | 4503  | termite gut homogenate clone Rs-H83 bacterium          | 3.548 | 0.006 | 0.001 |
| NC10            | Unclassified                  | sf_1  | 10254 | uranium mill tailings soil sample clone Sh765B-TzT-35  | 3.551 | 0.005 | 0.001 |

|                |                       |      |       |                                                                    |       |       |       |
|----------------|-----------------------|------|-------|--------------------------------------------------------------------|-------|-------|-------|
| Proteobacteria | Pasteurellaceae       | sf_1 | 9628  | Histophilus somni str. CCUG 12839                                  | 3.553 | 0.010 | 0.001 |
| Proteobacteria | Alteromonadaceae      | sf_1 | 8222  |                                                                    | 3.557 | 0.007 | 0.001 |
| Actinobacteria | Kineosporiaceae       | sf_1 | 1581  | Cryptosporangium aurantiacum str. IMSNU 22120                      | 3.557 | 0.009 | 0.001 |
| Firmicutes     | Sporolactobacillaceae | sf_1 | 3747  | Bacillus sp. str. C-59-2                                           | 3.563 | 0.006 | 0.001 |
| Actinobacteria | Unclassified          | sf_3 | 1348  | lichen-dominated Antarctic cryptoendolithic community clone FBP406 | 3.564 | 0.005 | 0.001 |
| Proteobacteria | Unclassified          | sf_3 | 9498  |                                                                    | 3.575 | 0.005 | 0.001 |
| Proteobacteria | Alteromonadaceae      | sf_1 | 8978  | Arctic sea ice ARK10108                                            | 3.577 | 0.009 | 0.001 |
| Proteobacteria | Methylophilaceae      | sf_1 | 8137  | freshwater clone PRD01a011B                                        | 3.577 | 0.006 | 0.001 |
| Firmicutes     | Bacillaceae           | sf_1 | 3730  | Bacillus baekryungensis str. SW-93                                 | 3.580 | 0.005 | 0.001 |
| Cyanobacteria  | Unclassified          | sf_5 | 270   | drinking water system simulator clone HOCiCi9                      | 3.581 | 0.004 | 0.000 |
| Proteobacteria | Alteromonadaceae      | sf_1 | 9386  | Alteromonas sp. str. NIBH P2M11                                    | 3.583 | 0.010 | 0.001 |
| Actinobacteria | Microbacteriaceae     | sf_1 | 1921  | Firmicutes isolate str. d8                                         | 3.584 | 0.009 | 0.001 |
| Proteobacteria | Oxalobacteraceae      | sf_1 | 8032  | Aquaspirillum arcticum str. IAM 14963                              | 3.589 | 0.009 | 0.001 |
| Firmicutes     | Peptostreptococcaceae | sf_5 | 134   | Peptoniphilus asaccharolyticus str. CCUG 9988                      | 3.590 | 0.004 | 0.000 |
| Proteobacteria | Oxalobacteraceae      | sf_1 | 8058  | Herbaspirillum seropedicae str. DSM 6445 ATCC 35892                | 3.597 | 0.009 | 0.001 |
| Proteobacteria | Pseudomonadaceae      | sf_1 | 9028  | Pseudomonas koreensis str. Ps 9-14                                 | 3.601 | 0.010 | 0.001 |
| Firmicutes     | Enterococcaceae       | sf_1 | 3392  | Vagococcus lutrae str. m1134/97/1; CCUG 39187                      | 3.601 | 0.011 | 0.001 |
| Proteobacteria | Desulfobulbaceae      | sf_1 | 10047 | epibiotic clone C11-D3                                             | 3.603 | 0.005 | 0.001 |
| Bacteroidetes  | Porphyromonadaceae    | sf_1 | 5454  | Dysgonomonas wimpennyi str. ANFA2                                  | 3.606 | 0.006 | 0.001 |
| Proteobacteria | Oxalobacteraceae      | sf_1 | 8158  | 2-HNA producing isolate MC13289                                    | 3.611 | 0.008 | 0.001 |
| Fusobacteria   | Fusobacteriaceae      | sf_3 | 558   | Sneathia sanguinegens str. CCUG 41628T                             | 3.612 | 0.007 | 0.001 |

|                |                     |       |       |                                                              |       |       |       |
|----------------|---------------------|-------|-------|--------------------------------------------------------------|-------|-------|-------|
| Proteobacteria | Hyphomicrobiaceae   | sf_1  | 7646  | Hyphomicrobium aestuarii str. DSM 1564                       | 3.614 | 0.005 | 0.000 |
| Proteobacteria | Pasteurellaceae     | sf_1  | 9349  | Pasteurella sp. str. 91985                                   | 3.620 | 0.008 | 0.001 |
| Firmicutes     | Aerococcaceae       | sf_1  | 3631  | Abiotrophia defectiva str. GIFU12707 (ATCC49176)             | 3.629 | 0.012 | 0.001 |
| Proteobacteria | Burkholderiaceae    | sf_1  | 8059  | Burkholderia caribensis str. MWAP71                          | 3.629 | 0.006 | 0.001 |
| Proteobacteria | Oxalobacteraceae    | sf_1  | 7878  | naphthalene-contaminated sediment clone 29                   | 3.632 | 0.008 | 0.001 |
| Planctomycetes | Anammoxales         | sf_4  | 4694  | USA: Colorado Fort collins Horsetooth Reservoir clone HT2F11 | 3.632 | 0.008 | 0.001 |
| Actinobacteria | Nocardiaceae        | sf_1  | 1917  | Nocardia otitidiscaviarum str. DSM43242                      | 3.634 | 0.007 | 0.001 |
| Proteobacteria | Pseudomonadaceae    | sf_1  | 8754  | Pseudomonas sp. str. P400Y-1                                 | 3.634 | 0.011 | 0.001 |
| Actinobacteria | Unclassified        | sf_2  | 1652  | marine sediment clone Bol7                                   | 3.634 | 0.007 | 0.001 |
| Proteobacteria | Pseudomonadaceae    | sf_1  | 9366  | Arctic seawater isolate str. R7366                           | 3.637 | 0.009 | 0.001 |
| Proteobacteria | Desulfomicrobiaceae | sf_1  | 10370 | Desulfomicrobium baculatum str. X; VKM B-1378; DSM 4         | 3.638 | 0.005 | 0.001 |
| Actinobacteria | Unclassified        | sf_1  | 1676  |                                                              | 3.639 | 0.007 | 0.001 |
| Nitrospira     | Nitrospiraceae      | sf_1  | 179   | Great Artesian Basin clone G19                               | 3.640 | 0.005 | 0.001 |
| Proteobacteria | Rhodobacteraceae    | sf_1  | 7433  | Scripsiella trochoidea NEPCC 15                              | 3.640 | 0.006 | 0.001 |
| Actinobacteria | Streptomycetaceae   | sf_3  | 1743  | Streptomyces scabiei str. DNK-G01                            | 3.640 | 0.007 | 0.001 |
| Proteobacteria | Alcaligenaceae      | sf_1  | 7992  | Alcaligenes faecalis 5659-H                                  | 3.642 | 0.009 | 0.001 |
| Proteobacteria | Unclassified        | sf_1  | 9008  | activated sludge clone SBRQ157                               | 3.644 | 0.005 | 0.001 |
| Proteobacteria | Pseudomonadaceae    | sf_1  | 8777  | Pseudomonas sp. str. KNA6-5                                  | 3.644 | 0.011 | 0.001 |
| Proteobacteria | Unclassified        | sf_1  | 8323  | hydrothermal sediment clone AF420363                         | 3.648 | 0.008 | 0.001 |
| Firmicutes     | Unclassified        | sf_17 | 2659  |                                                              | 3.648 | 0.005 | 0.001 |
| Proteobacteria | Desulfobacteraceae  | sf_5  | 9777  | Guaymas Basin hydrothermal vent sediments clone B01R004      | 3.649 | 0.005 | 0.000 |



|                |                      |       |      |                                                          |       |       |       |
|----------------|----------------------|-------|------|----------------------------------------------------------|-------|-------|-------|
| Proteobacteria | Moraxellaceae        | sf_3  | 9428 | hydrocarbon-degrading consortium clone AF2-1D            | 3.652 | 0.008 | 0.001 |
| Proteobacteria | Ralstoniaceae        | sf_1  | 7823 | Wautersia basilensis str. DSM 11853                      | 3.652 | 0.007 | 0.001 |
| Proteobacteria | Pseudomonadaceae     | sf_1  | 8708 |                                                          | 3.657 | 0.010 | 0.001 |
| Acidobacteria  | Acidobacteriaceae    | sf_14 | 6410 |                                                          | 3.659 | 0.004 | 0.000 |
| Proteobacteria | Pasteurellaceae      | sf_1  | 8433 | Pseudomonas syringae pv. broussonetiae str. KOZ 8101 pv. | 3.662 | 0.009 | 0.001 |
| Actinobacteria | Streptomycetaceae    | sf_1  | 1786 | Streptomyces bikiniensis str. DSM40581                   | 3.670 | 0.004 | 0.000 |
| Firmicutes     | Bacillaceae          | sf_1  | 3763 | Geobacillus stearothermophilus                           | 3.674 | 0.005 | 0.001 |
| Proteobacteria | Pseudomonadaceae     | sf_1  | 8601 | Pseudomonas marginalis str. ATCC 10844T                  | 3.675 | 0.009 | 0.001 |
| Proteobacteria | Pseudomonadaceae     | sf_1  | 8338 | Pseudomonas synxantha str. DSM 13080 G                   | 3.677 | 0.009 | 0.001 |
| Firmicutes     | Bacillaceae          | sf_1  | 3589 | Bacillus senegalensis str. RS8; CIP 106 669              | 3.679 | 0.004 | 0.000 |
| Proteobacteria | Unclassified         | sf_3  | 8327 | Arctic sea ice ARK10148                                  | 3.681 | 0.009 | 0.001 |
| Proteobacteria | Unclassified         | sf_1  | 9316 |                                                          | 3.682 | 0.004 | 0.000 |
| Proteobacteria | Pasteurellaceae      | sf_1  | 9030 | Volucribacter amazonae str. B96/5                        | 3.683 | 0.010 | 0.001 |
| Actinobacteria | Streptomycetaceae    | sf_1  | 1983 | Streptomyces cinnabarinus str. ISP 5467                  | 3.686 | 0.004 | 0.000 |
| Proteobacteria | Alteromonadaceae     | sf_1  | 8196 |                                                          | 3.686 | 0.006 | 0.001 |
| Actinobacteria | Unclassified         | sf_4  | 1337 | Sturt arid-zone soil clone #0425-2M17                    | 3.691 | 0.007 | 0.001 |
| Cyanobacteria  | Chloroplasts         | sf_11 | 5123 | Lepocinclis fusiformis str. ACOI 1025                    | 3.693 | 0.006 | 0.001 |
| Proteobacteria | Pseudomonadaceae     | sf_1  | 9221 | Pseudomonas fulgida str. DSM 14938 = LMG 2146 P 515/12   | 3.695 | 0.009 | 0.001 |
| Proteobacteria | Acidithiobacillaceae | sf_1  | 9224 | Acidithiobacillus albertensis str. DSM 14366             | 3.697 | 0.007 | 0.001 |
| Proteobacteria | Pseudomonadaceae     | sf_1  | 9056 | Pseudomonas aeruginosa str. #47                          | 3.698 | 0.010 | 0.001 |
| Proteobacteria | Moraxellaceae        | sf_3  | 9466 | Acinetobacter tandoii str. 4N13                          | 3.698 | 0.010 | 0.001 |

|                 |                         |        |       |                                                                    |       |       |       |
|-----------------|-------------------------|--------|-------|--------------------------------------------------------------------|-------|-------|-------|
| Proteobacteria  | Xanthomonadaceae        | sf_3   | 8577  | Xanthomonas axonopodis pv. citri str. MA                           | 3.700 | 0.004 | 0.000 |
| Proteobacteria  | Acetobacteraceae        | sf_1   | 6637  | Acetobacter aceti str. NCIB8621 DSM3508                            | 3.701 | 0.007 | 0.001 |
| Proteobacteria  | Ralstoniaceae           | sf_1   | 8128  | Cupriavidus necator                                                | 3.701 | 0.007 | 0.001 |
| Actinobacteria  | Cellulomonadaceae       | sf_1   | 1589  | Oerskovia turbata str. DSM 20577T                                  | 3.702 | 0.006 | 0.001 |
| Verrucomicrobia | Unclassified            | sf_3   | 11    | sludge clone H2                                                    | 3.706 | 0.005 | 0.001 |
| Actinobacteria  | Acidimicrobiaceae       | sf_1   | 1856  | forested wetland clone RCP2-105                                    | 3.706 | 0.005 | 0.001 |
| Firmicutes      | Peptococc/Acidaminococc | sf_11  | 150   |                                                                    | 3.707 | 0.013 | 0.001 |
| Firmicutes      | Peptostreptococcaceae   | sf_5   | 2710  | DCP-dechlorinating consortium clone SHA-74                         | 3.709 | 0.005 | 0.001 |
| Chloroflexi     | Unclassified            | sf_5   | 1051  | forest soil clone DUNssu055 (-2B) (OTU#087)                        | 3.710 | 0.003 | 0.000 |
| Proteobacteria  | Desulfobulbaceae        | sf_1   | 10062 | marine sediment above hydrate ridge clone Hyd24-11 proteobacterium | 3.710 | 0.004 | 0.000 |
| Proteobacteria  | Enterobacteriaceae      | sf_1   | 8286  | Cyphonococcus alpinus symbiont                                     | 3.717 | 0.008 | 0.001 |
| Acidobacteria   | Acidobacteriaceae       | sf_6   | 6362  | grassland soil clone DA052                                         | 3.717 | 0.006 | 0.001 |
| Proteobacteria  | Pseudomonadaceae        | sf_1   | 9172  | Pseudomonas psychrophila str. E-3                                  | 3.722 | 0.008 | 0.001 |
| Proteobacteria  | Moraxellaceae           | sf_3   | 8604  | Moraxella oblonga str. IAM 14971                                   | 3.725 | 0.005 | 0.001 |
| Firmicutes      | Unclassified            | sf_4   | 2716  | termite gut homogenate clone Rs-F76 bacterium                      | 3.730 | 0.004 | 0.000 |
| Proteobacteria  | Alteromonadaceae        | sf_1   | 8503  | Arctic sea ice ARK10244                                            | 3.730 | 0.005 | 0.001 |
| Proteobacteria  | Ralstoniaceae           | sf_1   | 7761  | Ralstonia detusculanense str. APF11                                | 3.730 | 0.008 | 0.001 |
| Actinobacteria  | Brevibacteriaceae       | sf_1   | 1745  | Brevibacterium iodinum str. DSM 2062T                              | 3.731 | 0.007 | 0.001 |
| Unclassified    | Unclassified            | sf_160 | 226   |                                                                    | 3.732 | 0.005 | 0.001 |
| Cyanobacteria   | Unclassified            | sf_1   | 5057  | Nodularia sphaerocarpa str. UTEX B 2093                            | 3.735 | 0.004 | 0.000 |
| Proteobacteria  | Pseudomonadaceae        | sf_1   | 8561  | Pseudomonas sp. B65                                                | 3.736 | 0.009 | 0.001 |

|                 |                               |       |      |                                                    |       |       |       |
|-----------------|-------------------------------|-------|------|----------------------------------------------------|-------|-------|-------|
| Proteobacteria  | Alteromonadaceae              | sf_1  | 9486 | Marine isolate str. GK-2001                        | 3.739 | 0.007 | 0.001 |
| Firmicutes      | Halobacillaceae               | sf_1  | 3552 | Paraliobacillus ryukyuensis                        | 3.739 | 0.005 | 0.000 |
| OP8             | Unclassified                  | sf_3  | 598  | Guaymas Basin hydrothermal sediment clone a2b010   | 3.742 | 0.006 | 0.001 |
| Aquificae       | Unclassified                  | sf_1  | 2364 | Thermovibrio ammoniificans str. HB-1               | 3.743 | 0.005 | 0.001 |
| Unclassified    | Unclassified                  | sf_95 | 2545 | anaerobic sludge isolate str. JE                   | 3.746 | 0.008 | 0.001 |
| Spirochaetes    | Spirochaetaceae               | sf_1  | 6465 | Spirochaeta sp. str. Grapes                        | 3.749 | 0.003 | 0.000 |
| Verrucomicrobia | Verrucomicrobia subdivision 5 | sf_1  | 629  | anoxic marine sediment clone LD1-PA50              | 3.750 | 0.004 | 0.000 |
| Proteobacteria  | Saccharospirillaceae          | sf_1  | 8889 | hypersaline Mono Lake clone ML110J-5               | 3.751 | 0.009 | 0.001 |
| Proteobacteria  | Pseudomonadaceae              | sf_1  | 8691 | Pseudomonas aeruginosa str. PAO1                   | 3.753 | 0.009 | 0.001 |
| Proteobacteria  | Pseudomonadaceae              | sf_1  | 9493 | Pseudomonas sp. str. dcm7B                         | 3.755 | 0.008 | 0.001 |
| Actinobacteria  | Streptomycetaceae             | sf_1  | 1771 | Streptomyces setonii str. ATCC25497                | 3.758 | 0.003 | 0.000 |
| Chloroflexi     | Unclassified                  | sf_1  | 1071 | denitrifying reactor clone 131                     | 3.761 | 0.004 | 0.000 |
| Proteobacteria  | Alteromonadaceae              | sf_1  | 9068 | Pseudomonas stutzeri str. A1501                    | 3.764 | 0.009 | 0.001 |
| Proteobacteria  | Unclassified                  | sf_6  | 6987 |                                                    | 3.768 | 0.007 | 0.001 |
| Bacteroidetes   | Porphyromonadaceae            | sf_1  | 5800 | Porphyromonas endodontalis str. ATCC 35406         | 3.776 | 0.008 | 0.001 |
| OP9/JS1         | Unclassified                  | sf_1  | 726  | hot spring clone OPB72                             | 3.777 | 0.006 | 0.001 |
| Proteobacteria  | Unclassified                  | sf_1  | 9282 |                                                    | 3.779 | 0.004 | 0.000 |
| Firmicutes      | Lachnospiraceae               | sf_5  | 3066 | Clostridium methoxybenzovorans str. SR3; DSM 12182 | 3.780 | 0.003 | 0.000 |
| Cyanobacteria   | Chloroplasts                  | sf_11 | 5098 | Euglena tripteris str. UW OB                       | 3.786 | 0.006 | 0.001 |
| Proteobacteria  | Pasteurellaceae               | sf_1  | 8861 | Haemophilus parasuis 427                           | 3.788 | 0.009 | 0.001 |
| Proteobacteria  | Rhodobacteraceae              | sf_1  | 6991 | Rhodobacter sphaeroides str. 2.4.1                 | 3.789 | 0.004 | 0.000 |

|                |                        |       |       |                                                                    |       |       |       |
|----------------|------------------------|-------|-------|--------------------------------------------------------------------|-------|-------|-------|
| Actinobacteria | Unclassified           | sf_3  | 1130  | Georgenia muralis str. 1A-C                                        | 3.791 | 0.004 | 0.000 |
| LD1PA group    | Unclassified           | sf_1  | 10118 | anoxic marine sediment clone LD1-PA38                              | 3.792 | 0.004 | 0.000 |
| Proteobacteria | Shewanellaceae         | sf_1  | 8201  | Shewanella surugaensis str. c959                                   | 3.792 | 0.007 | 0.001 |
| Firmicutes     | Thermoactinomycetaceae | sf_1  | 3539  | Laceyella sacchari str. KCTC 9789 ()                               | 3.794 | 0.003 | 0.000 |
| Proteobacteria | Burkholderiaceae       | sf_1  | 8011  | Burkholderia graminis str. AUS35                                   | 3.797 | 0.004 | 0.000 |
| Cyanobacteria  | Chloroplasts           | sf_5  | 5166  |                                                                    | 3.798 | 0.004 | 0.000 |
| Firmicutes     | Erysipelotrichaceae    | sf_3  | 4038  | Bulleidia moorei str. JCM 10647 RCA59-77                           | 3.803 | 0.004 | 0.000 |
| Actinobacteria | Dermabacteraceae       | sf_1  | 1504  | Brachybacterium sacelli str. LMG 20338                             | 3.812 | 0.006 | 0.001 |
| Firmicutes     | Paenibacillaceae       | sf_1  | 3559  | Paenibacillus turicensis str. MOL722                               | 3.816 | 0.004 | 0.000 |
| Actinobacteria | Streptomycetaceae      | sf_1  | 1617  | soil clone 41-1                                                    | 3.818 | 0.004 | 0.000 |
| Firmicutes     | Bacillaceae            | sf_1  | 3540  | Geobacillus thermoleovorans str. B23                               | 3.818 | 0.003 | 0.000 |
| Proteobacteria | Xanthomonadaceae       | sf_3  | 9286  | Stenotrophomonas maltophilia str. LMG 11104                        | 3.818 | 0.005 | 0.001 |
| Proteobacteria | Xanthobacteraceae      | sf_1  | 6660  | Azorhizobium caulinodans str. ORS 571                              | 3.819 | 0.003 | 0.000 |
| Firmicutes     | Streptococcaceae       | sf_1  | 3446  | Streptococcus bovis str. HJ50                                      | 3.820 | 0.008 | 0.001 |
| Bacteroidetes  | Prevotellaceae         | sf_1  | 6011  | rumen clone F24-B03                                                | 3.821 | 0.008 | 0.001 |
| Bacteroidetes  | Unclassified           | sf_15 | 6233  | oral periodontitis clone FX069                                     | 3.825 | 0.006 | 0.001 |
| Proteobacteria | Desulfobulbaceae       | sf_1  | 10107 | marine sediment above hydrate ridge clone Hyd24-30 proteobacterium | 3.830 | 0.007 | 0.001 |
| Proteobacteria | Pseudomonadaceae       | sf_1  | 9295  |                                                                    | 3.830 | 0.009 | 0.001 |
| Firmicutes     | Peptostreptococcaceae  | sf_5  | 3112  | Evry municipal wastewater treatment plant clone 012C11_B_SD_P15    | 3.832 | 0.003 | 0.000 |
| Proteobacteria | Nitrosomonadaceae      | sf_1  | 7931  | Nitrospira multiformis                                             | 3.832 | 0.005 | 0.001 |
| Proteobacteria | Pseudomonadaceae       | sf_1  | 9588  | Pseudomonas citronellolis str. TERIDB18                            | 3.832 | 0.008 | 0.001 |

|                  |                           |        |      |                                                  |       |       |       |
|------------------|---------------------------|--------|------|--------------------------------------------------|-------|-------|-------|
| Actinobacteria   | Streptomycetaceae         | sf_1   | 1690 | Streptomyces galbus str. DSM40480                | 3.832 | 0.003 | 0.000 |
| Proteobacteria   | Rhodobacteraceae          | sf_1   | 7263 |                                                  | 3.834 | 0.004 | 0.000 |
| Firmicutes       | Clostridiaceae            | sf_12  | 4157 | termite gut homogenate clone Rs-A15 bacterium    | 3.836 | 0.004 | 0.000 |
| Proteobacteria   | Moraxellaceae             | sf_3   | 8727 | Alkanindiges hongkongensis str. HKU9             | 3.839 | 0.006 | 0.001 |
| Proteobacteria   | Oxalobacteraceae          | sf_1   | 8013 | isolate str. A1020                               | 3.845 | 0.006 | 0.001 |
| Thermodesulfobac | Thermodesulfobacteriaceae | sf_1   | 667  | Geothermobacterium ferrireducens                 | 3.847 | 0.006 | 0.001 |
| Actinobacteria   | Streptomycetaceae         | sf_1   | 1544 | Kitasatospora cystarginea str. IFO14836T         | 3.848 | 0.004 | 0.000 |
| Proteobacteria   | Oxalobacteraceae          | sf_1   | 7843 | Massilia timonae timone                          | 3.852 | 0.005 | 0.001 |
| Proteobacteria   | Coxiellaceae              | sf_3   | 9444 | forested wetland clone FW23                      | 3.859 | 0.005 | 0.001 |
| Firmicutes       | Streptococcaceae          | sf_1   | 3397 | Streptococcus macedonicus str. ACA-DC 206 LAB617 | 3.862 | 0.008 | 0.001 |
| Unclassified     | Unclassified              | sf_160 | 1914 |                                                  | 3.865 | 0.003 | 0.000 |
| Bacteroidetes    | Unclassified              | sf_15  | 5257 | marine? clone KD3-67                             | 3.869 | 0.003 | 0.000 |
| Proteobacteria   | Anaplasmataceae           | sf_3   | 6908 | Rhinocyllus conicus endosymbiont                 | 3.870 | 0.003 | 0.000 |
| Cyanobacteria    | Unclassified              | sf_5   | 5030 | Hapalosiphon welwitschii                         | 3.871 | 0.003 | 0.000 |
| Actinobacteria   | Actinomycetaceae          | sf_1   | 2039 | Actinomyces cardiffensis str. CCUG 44997         | 3.875 | 0.003 | 0.000 |
| Cyanobacteria    | Unclassified              | sf_5   | 5015 | Chlorogloeopsis fritschii str. PCC 6912          | 3.878 | 0.003 | 0.000 |
| Chloroflexi      | Unclassified              | sf_2   | 789  | travertine hot spring clone SM1D10               | 3.879 | 0.003 | 0.000 |
| Proteobacteria   | Enterobacteriaceae        | sf_1   | 8513 | Pseudomonas monteillii str. CIP 104883           | 3.881 | 0.007 | 0.001 |
| Actinobacteria   | Unclassified              | sf_3   | 1243 | termite gut homogenate clone Rs-M95 bacterium    | 3.883 | 0.004 | 0.000 |
| Chlorobi         | Chlorobiaceae             | sf_1   | 262  | Chlorobium ferrooxidans DSM 13031 str. KofoX     | 3.884 | 0.003 | 0.000 |
| Planctomycetes   | Anammoxales               | sf_4   | 4695 | Crater Lake clone CL500-15                       | 3.885 | 0.004 | 0.000 |

|                 |                         |       |      |                                                        |       |       |       |
|-----------------|-------------------------|-------|------|--------------------------------------------------------|-------|-------|-------|
| Actinobacteria  | Unclassified            | sf_1  | 1666 |                                                        | 3.886 | 0.003 | 0.000 |
| Proteobacteria  | Legionellaceae          | sf_1  | 8865 | Arctic pack ice; clone ARKCH2Br2-23                    | 3.889 | 0.007 | 0.001 |
| Proteobacteria  | Burkholderiaceae        | sf_1  | 8097 | Burkholderia cepacia                                   | 3.895 | 0.004 | 0.000 |
| Firmicutes      | Bacillaceae             | sf_1  | 305  | Bacillus thermoleovorans                               | 3.898 | 0.003 | 0.000 |
| Proteobacteria  | Pseudomonadaceae        | sf_1  | 9267 | Pseudomonas syringae pv. theae str. PT1                | 3.898 | 0.007 | 0.001 |
| Firmicutes      | Mycoplasmataceae        | sf_1  | 4014 | Mycoplasma pulmonis str. UAB CTIP                      | 3.899 | 0.003 | 0.000 |
| Actinobacteria  | Nocardiaceae            | sf_1  | 2048 | Nocardia uniformis str. DSM 43136                      | 3.905 | 0.004 | 0.000 |
| Proteobacteria  | Unclassified            | sf_3  | 8714 | Marinobacter hydrocarbonoclasticus str. ATCC 27132T    | 3.908 | 0.006 | 0.001 |
| Firmicutes      | Peptococc/Acidaminococc | sf_11 | 865  | Selenomonas sputigena str. ATCC 35185                  | 3.910 | 0.009 | 0.001 |
| Proteobacteria  | Alteromonadaceae        | sf_1  | 8374 | Agarivorans albus str. MKT 89                          | 3.915 | 0.005 | 0.001 |
| Proteobacteria  | Coxiellaceae            | sf_3  | 8969 | uranium mining waste clone JG30-KF-C15 proteobacterium | 3.915 | 0.004 | 0.000 |
| Cyanobacteria   | Unclassified            | sf_1  | 5189 | Oscillatoria sancta str. PCC 7515                      | 3.922 | 0.002 | 0.000 |
| Bacteroidetes   | Flexibacteraceae        | sf_19 | 5542 | Cytophaga sp. I-1787                                   | 3.923 | 0.004 | 0.000 |
| Firmicutes      | Lachnospiraceae         | sf_5  | 2804 | Clostridium amygdalinum str. BR-10                     | 3.925 | 0.002 | 0.000 |
| Proteobacteria  | Acidithiobacillaceae    | sf_1  | 8552 | Acidithiobacillus ferrooxidans str. D2                 | 3.925 | 0.005 | 0.001 |
| NC10            | Unclassified            | sf_1  | 452  | vadose clone 5G01                                      | 3.926 | 0.003 | 0.000 |
| Gemmatimonadete | Unclassified            | sf_5  | 2047 | soil clone #0319-7G21                                  | 3.928 | 0.004 | 0.000 |
| Proteobacteria  | Pseudomonadaceae        | sf_1  | 9469 | cf. Pseudomonas sp. clone Llangefni 52                 | 3.929 | 0.007 | 0.001 |
| Firmicutes      | Unclassified            | sf_6  | 149  | Streptococcus pleomorphus                              | 3.930 | 0.006 | 0.001 |
| Acidobacteria   | Acidobacteriaceae       | sf_14 | 105  | marine sediment above hydrate ridge clone Hyd24-44 sp. | 3.931 | 0.004 | 0.000 |
| Proteobacteria  | Pseudomonadaceae        | sf_1  | 9243 | Pseudomonas tolaasii str. LMG 2342T ()                 | 3.934 | 0.007 | 0.001 |

|                  |                                  |      |       |                                                             |       |       |       |
|------------------|----------------------------------|------|-------|-------------------------------------------------------------|-------|-------|-------|
| Proteobacteria   | Desulfobulbaceae                 | sf_1 | 10097 | inactive deep-sea hydrothermal vent chimneys clone IndB2-42 | 3.938 | 0.004 | 0.000 |
| Bacteroidetes    | Porphyromonadaceae               | sf_1 | 5460  | mouse feces clone F8                                        | 3.940 | 0.006 | 0.001 |
| Proteobacteria   | Alteromonadaceae                 | sf_1 | 8318  | Aestuariibacter salexigens str. JC2042                      | 3.941 | 0.006 | 0.001 |
| Proteobacteria   | Halomonadaceae                   | sf_1 | 8317  | Chromohalobacter canadensis str. DSM6769                    | 3.941 | 0.004 | 0.000 |
| Proteobacteria   | Enterobacteriaceae               | sf_1 | 8532  |                                                             | 3.943 | 0.003 | 0.000 |
| Firmicutes       | Lachnospiraceae                  | sf_5 | 4539  | termite gut homogenate clone Rs-C61 bacterium               | 3.951 | 0.003 | 0.000 |
| Proteobacteria   | Desulfobulbaceae                 | sf_1 | 9734  | Riftia pachyptila's tube clone R103-B13                     | 3.951 | 0.004 | 0.000 |
| Firmicutes       | Streptococcaceae                 | sf_1 | 3560  | Streptococcus gallinaceus str. CCUG 42692                   | 3.952 | 0.007 | 0.001 |
| Firmicutes       | Lachnospiraceae                  | sf_5 | 3001  | human colonic clone HuCA20                                  | 3.952 | 0.003 | 0.000 |
| Proteobacteria   | Enterobacteriaceae               | sf_1 | 8182  | Proteus vulgaris str. IFAM 1731                             | 3.955 | 0.005 | 0.001 |
| Proteobacteria   | Burkholderiaceae                 | sf_1 | 7771  | Burkholderia glathei str. ATCC 29195T                       | 3.955 | 0.003 | 0.000 |
| Firmicutes       | Lachnospiraceae                  | sf_5 | 2784  | human colonic clone HuCB12                                  | 3.960 | 0.002 | 0.000 |
| Gemmatimonadetes | Unclassified                     | sf_5 | 442   | forest soil clone S0134                                     | 3.961 | 0.006 | 0.001 |
| Firmicutes       | Bacillaceae                      | sf_1 | 3675  | Bacillus mojavenensis str. M-1                              | 3.963 | 0.003 | 0.000 |
| Firmicutes       | Peptostreptococcaceae            | sf_5 | 17    | Peptostreptococcus sp. oral clone P4PA_156 P4 oral          | 3.963 | 0.002 | 0.000 |
| Proteobacteria   | Beijerinck/Rhodoplan/Methylocyst | sf_3 | 7153  | Methylocella tundrae str. Y1                                | 3.966 | 0.002 | 0.000 |
| Firmicutes       | Lachnospiraceae                  | sf_5 | 2937  | swine intestine clone p-2482-18B5                           | 3.967 | 0.002 | 0.000 |
| Bacteroidetes    | Unclassified                     | sf_1 | 5745  |                                                             | 3.968 | 0.007 | 0.001 |
| Proteobacteria   | Polyangiaceae                    | sf_3 | 9912  | uranium mining waste pile clone JG34-KF-14 proteobacterium  | 3.969 | 0.004 | 0.000 |
| Proteobacteria   | Phyllobacteriaceae               | sf_1 | 7497  | Pseudaminobacter salicylatoxidans str. KTC001               | 3.974 | 0.002 | 0.000 |
| Firmicutes       | Streptococcaceae                 | sf_1 | 3313  | Streptococcus salivarius str. ATCC 7073                     | 3.978 | 0.006 | 0.001 |

|                 |                               |       |       |                                                                 |       |       |       |
|-----------------|-------------------------------|-------|-------|-----------------------------------------------------------------|-------|-------|-------|
| Proteobacteria  | Alcaligenaceae                | sf_1  | 7788  | atrazine-catabolizing microbial absence methanol clone KRA30-58 | 3.979 | 0.004 | 0.000 |
| Proteobacteria  | Anaplasmataceae               | sf_3  | 6803  | Wolbachia sp. Dlem16SWol                                        | 3.982 | 0.002 | 0.000 |
| Firmicutes      | Bacillaceae                   | sf_1  | 3831  | Bacillus licheniformis str. KL-068                              | 3.989 | 0.004 | 0.000 |
| Proteobacteria  | Rickettsiaceae                | sf_1  | 7556  | Rickettsia bellii str. strains 369-C and G2D42                  | 3.989 | 0.004 | 0.000 |
| Proteobacteria  | Burkholderiaceae              | sf_1  | 8068  | Burkholderia caryophylli str. ATCC 25418                        | 3.990 | 0.004 | 0.000 |
| Firmicutes      | Peptostreptococcaceae         | sf_5  | 2679  | termite gut homogenate clone BCf9-13                            | 3.993 | 0.002 | 0.000 |
| Unclassified    | Unclassified                  | sf_93 | 925   | 4MB-degrading consortium clone UASB_TL26                        | 3.995 | 0.005 | 0.001 |
| Proteobacteria  | Pseudomonadaceae              | sf_1  | 9310  | Pseudomonas sp. str. AC-167                                     | 4.000 | 0.005 | 0.000 |
| Firmicutes      | Lactobacillaceae              | sf_1  | 3768  | Lactobacillus perolens str. L532                                | 4.001 | 0.004 | 0.000 |
| Proteobacteria  | Unclassified                  | sf_1  | 10092 | heavy metal-contaminated soil clone a13134                      | 4.005 | 0.002 | 0.000 |
| Actinobacteria  | Unclassified                  | sf_1  | 1217  | DCP-dechlorinating consortium clone SHA-34                      | 4.007 | 0.003 | 0.000 |
| Actinobacteria  | Acidimicrobiaceae             | sf_1  | 2030  | forested wetland clone RCP1-33                                  | 4.007 | 0.002 | 0.000 |
| Actinobacteria  | Thermomonosporaceae           | sf_1  | 1669  | Pseudonocardia str. PA123                                       | 4.010 | 0.002 | 0.000 |
| Nitrospira      | Nitrospiraceae                | sf_2  | 544   | forested wetland clone FW5                                      | 4.014 | 0.002 | 0.000 |
| Proteobacteria  | Pseudomonadaceae              | sf_1  | 8484  | Alteromonadaceae isolate str. LA50                              | 4.017 | 0.003 | 0.000 |
| Proteobacteria  | Pseudomonadaceae              | sf_1  | 8263  |                                                                 | 4.018 | 0.006 | 0.001 |
| Proteobacteria  | Coxiellaceae                  | sf_3  | 9198  | uranium mining waste pile clone KF-JG30-B15 KF-JG30-B15         | 4.022 | 0.005 | 0.001 |
| Proteobacteria  | Unclassified                  | sf_1  | 8605  | bacterioplankton clone ZA2525c                                  | 4.030 | 0.002 | 0.000 |
| Verrucomicrobia | Verrucomicrobia subdivision 5 | sf_1  | 530   | anoxic marine sediment clone LD1-PB20                           | 4.030 | 0.003 | 0.000 |
| Proteobacteria  | Xanthomonadaceae              | sf_3  | 9270  | Stenotrophomonas rhizophila str. e-p10                          | 4.031 | 0.005 | 0.001 |
| Firmicutes      | Unclassified                  | sf_17 | 4307  |                                                                 | 4.031 | 0.005 | 0.001 |



|                |                         |       |      |                                                               |       |       |       |
|----------------|-------------------------|-------|------|---------------------------------------------------------------|-------|-------|-------|
| Proteobacteria | Unclassified            | sf_3  | 8245 |                                                               | 4.034 | 0.003 | 0.000 |
| Bacteroidetes  | Prevotellaceae          | sf_1  | 6047 | deep marine sediment clone MB-A2-107                          | 4.038 | 0.006 | 0.001 |
| Acidobacteria  | Acidobacteriaceae       | sf_14 | 6368 | soil clone UA2                                                | 4.042 | 0.005 | 0.001 |
| Firmicutes     | Bacillaceae             | sf_1  | 3612 | Bacillus schlegelii str. ATCC 43741T                          | 4.042 | 0.004 | 0.000 |
| Actinobacteria | Acidimicrobiaceae       | sf_1  | 1360 | forested wetland clone RCP2-103                               | 4.042 | 0.003 | 0.000 |
| Proteobacteria | Acidithiobacillaceae    | sf_1  | 8320 | acid mine drainage clone BA11                                 | 4.044 | 0.005 | 0.001 |
| Firmicutes     | Caryophanaceae          | sf_1  | 3285 | Caryophanon latum str. DSM 14151                              | 4.045 | 0.003 | 0.000 |
| Actinobacteria | Nocardiaceae            | sf_1  | 1146 | Nocardia otitidiscaviarum str. S639                           | 4.048 | 0.004 | 0.000 |
| Actinobacteria | Nocardiaceae            | sf_1  | 1142 |                                                               | 4.049 | 0.002 | 0.000 |
| Proteobacteria | Pasteurellaceae         | sf_1  | 9360 | Pasteurella multocida subsp. gallicida str. MCCM 00021 subsp. | 4.049 | 0.006 | 0.001 |
| Proteobacteria | Thiotrichaceae          | sf_3  | 8487 |                                                               | 4.049 | 0.005 | 0.001 |
| Proteobacteria | Rhodocyclaceae          | sf_1  | 8156 | industrial-phenol-degrading community clone MM1 sp.           | 4.050 | 0.004 | 0.000 |
| Firmicutes     | Streptococcaceae        | sf_1  | 3287 | tongue dorsum scrapings clone FP015                           | 4.054 | 0.006 | 0.001 |
| Bacteroidetes  | Prevotellaceae          | sf_1  | 5484 | oral periodontitis clone FX046                                | 4.059 | 0.006 | 0.001 |
| Proteobacteria | Pseudomonadaceae        | sf_1  | 9005 | Pseudomonas sp. str. KY                                       | 4.061 | 0.006 | 0.001 |
| Proteobacteria | Pseudomonadaceae        | sf_1  | 8755 | Pseudomonas sp. SK-1-3-1                                      | 4.063 | 0.006 | 0.001 |
| Proteobacteria | Unclassified            | sf_1  | 7264 | Bosea thiooxidans TJ1                                         | 4.063 | 0.002 | 0.000 |
| Actinobacteria | Dermatophilaceae        | sf_1  | 1852 | Tonsillophilus suis str. HT1-19                               | 4.064 | 0.002 | 0.000 |
| Actinobacteria | Streptosporangiaceae    | sf_1  | 1190 | Nonomuraea polychroma str. IFO 14345                          | 4.065 | 0.004 | 0.000 |
| Firmicutes     | Peptococc/Acidaminococc | sf_11 | 275  | clone AKS21                                                   | 4.065 | 0.002 | 0.000 |
| Proteobacteria | Comamonadaceae          | sf_1  | 7949 | Variovorax paradoxus TG27                                     | 4.067 | 0.002 | 0.000 |

|                  |                     |      |       |                                                            |       |       |       |
|------------------|---------------------|------|-------|------------------------------------------------------------|-------|-------|-------|
| Proteobacteria   | Unclassified        | sf_1 | 7808  | Mammoth cave clone CCU25                                   | 4.069 | 0.004 | 0.000 |
| Proteobacteria   | Aeromonadaceae      | sf_1 | 8366  | Psychrobacter frigidicola str. DSM 12411                   | 4.070 | 0.003 | 0.000 |
| Firmicutes       | Streptococcaceae    | sf_1 | 3250  | Streptococcus bovis str. B315                              | 4.071 | 0.006 | 0.001 |
| Firmicutes       | Streptococcaceae    | sf_1 | 3906  | Streptococcus bovis str.ATCC 43143                         | 4.071 | 0.006 | 0.001 |
| Proteobacteria   | Burkholderiaceae    | sf_1 | 7969  | Burkholderia sp.                                           | 4.072 | 0.003 | 0.000 |
| WS5              | Unclassified        | sf_2 | 8119  | Guaymas Basin hydrothermal sediment clone a2b013           | 4.073 | 0.002 | 0.000 |
| Synergistes      | Unclassified        | sf_3 | 719   | Synergistes sp. P1 str. P4G_18                             | 4.075 | 0.004 | 0.000 |
| Proteobacteria   | Unclassified        | sf_1 | 7818  | soil sample uranium clone JG36-TzT-215 proteobacterium     | 4.080 | 0.005 | 0.001 |
| Coprothermobacte | Unclassified        | sf_1 | 751   | Coprothermobacter sp. str. Dex80-3                         | 4.088 | 0.004 | 0.000 |
| Proteobacteria   | Nitrosomonadaceae   | sf_1 | 7682  | Nitrosovibrio sp. str. RY6A                                | 4.088 | 0.004 | 0.000 |
| Proteobacteria   | Coxiellaceae        | sf_3 | 8474  | ground water Tomsk-7 clone S15A-MN7 proteobacterium        | 4.088 | 0.006 | 0.001 |
| Proteobacteria   | Alteromonadaceae    | sf_1 | 9236  | attached marine recovered surface clone 18 proteobacterium | 4.088 | 0.005 | 0.001 |
| Proteobacteria   | Unclassified        | sf_1 | 10543 | hydrothermal vent clone PVB_10                             | 4.089 | 0.002 | 0.000 |
| marine group A   | Unclassified        | sf_1 | 6454  | marine clone SAR406                                        | 4.091 | 0.002 | 0.000 |
| Synergistes      | Unclassified        | sf_3 | 60    | Flexistipes sp. str. E3_33                                 | 4.091 | 0.004 | 0.000 |
| Actinobacteria   | Thermomonosporaceae | sf_1 | 1741  | Actinomadura pelletieri str. IMSNU 22169T                  | 4.092 | 0.002 | 0.000 |
| Synergistes      | Unclassified        | sf_3 | 740   | swine intestine clone p-4292-4Wa3                          | 4.094 | 0.004 | 0.000 |
| Bacteroidetes    | Prevotellaceae      | sf_1 | 5905  | swine intestine clone p-2443-18B5                          | 4.096 | 0.006 | 0.001 |
| Verrucomicrobia  | Verrucomicrobiaceae | sf_6 | 203   | Akkermansia muciniphila                                    | 4.097 | 0.002 | 0.000 |
| Actinobacteria   | Nocardiopsaceae     | sf_1 | 1385  | Streptomonospora salina str. YIM90002                      | 4.099 | 0.002 | 0.000 |
| Proteobacteria   | Thiotrichaceae      | sf_3 | 9321  | marine sediment clone Tokyo Bay D                          | 4.100 | 0.003 | 0.000 |

|                 |                        |       |      |                                                             |       |       |       |
|-----------------|------------------------|-------|------|-------------------------------------------------------------|-------|-------|-------|
| Proteobacteria  | Rhizobiaceae           | sf_1  | 7051 | Mycoplana dimorpha str. IAM 13154                           | 4.100 | 0.002 | 0.000 |
| Firmicutes      | Clostridiaceae         | sf_12 | 4187 | Clostridiales oral clone P4PB_122 P3                        | 4.101 | 0.003 | 0.000 |
| Proteobacteria  | Unclassified           | sf_1  | 8654 | inactive deep-sea hydrothermal vent chimneys clone lheB2-31 | 4.107 | 0.003 | 0.000 |
| OD1             | Unclassified           | sf_1  | 515  |                                                             | 4.109 | 0.002 | 0.000 |
| Proteobacteria  | Xanthomonadaceae       | sf_3  | 9167 | pea aphid symbiont clone APe4_38                            | 4.109 | 0.002 | 0.000 |
| TM7             | Unclassified           | sf_1  | 3145 | tongue dorsa clone DR034                                    | 4.113 | 0.002 | 0.000 |
| Verrucomicrobia | Unclassified           | sf_3  | 40   | Elbe river clone DEV055                                     | 4.116 | 0.002 | 0.000 |
| Firmicutes      | Unclassified           | sf_1  | 4298 | human mouth clone P4PA_66                                   | 4.118 | 0.002 | 0.000 |
| Proteobacteria  | Unclassified           | sf_8  | 9558 |                                                             | 4.120 | 0.004 | 0.000 |
| Proteobacteria  | Ectothiorhodospiraceae | sf_1  | 9598 | Mono Lake clone ML602J-47 proteobacterium                   | 4.125 | 0.004 | 0.000 |
| Firmicutes      | Lachnospiraceae        | sf_5  | 3036 | termite gut homogenate clone Rs-F27 bacterium               | 4.126 | 0.002 | 0.000 |
| Chloroflexi     | Unclassified           | sf_1  | 2485 |                                                             | 4.130 | 0.002 | 0.000 |
| Bacteroidetes   | Unclassified           | sf_3  | 5248 | Delaware River estuary clone 1G12                           | 4.136 | 0.005 | 0.001 |
| Proteobacteria  | Pasteurellaceae        | sf_1  | 8413 | DCP-dechlorinating consortium clone SHA-37                  | 4.136 | 0.002 | 0.000 |
| Firmicutes      | Bacillaceae            | sf_1  | 3706 | Bacillus sonorensis str. NRRL B-23155                       | 4.139 | 0.002 | 0.000 |
| Proteobacteria  | Unclassified           | sf_1  | 7222 | Great Artesian Basin clone B79                              | 4.139 | 0.004 | 0.000 |
| Proteobacteria  | Pasteurellaceae        | sf_1  | 8876 | Mannheimia sp. R19.2 str. R19.2; CCUG 38463 R19.2           | 4.141 | 0.005 | 0.001 |
| Proteobacteria  | Phyllobacteriaceae     | sf_1  | 7300 | marine isolate JP57                                         | 4.143 | 0.003 | 0.000 |
| Proteobacteria  | Moraxellaceae          | sf_3  | 8838 | Psychrobacter psychrophilus CMS 28                          | 4.146 | 0.003 | 0.000 |
| TM7             | Unclassified           | sf_1  | 3151 | activated sludge foam clone 71                              | 4.146 | 0.003 | 0.000 |
| Proteobacteria  | Rhizobiaceae           | sf_1  | 6683 | Sinorhizobium fredii str. ATCC35423                         | 4.146 | 0.002 | 0.000 |

|                |                    |        |       |                                                                      |       |       |       |
|----------------|--------------------|--------|-------|----------------------------------------------------------------------|-------|-------|-------|
| Firmicutes     | Unclassified       | sf_1   | 4261  | termite gut homogenate clone Rs-G04 bacterium                        | 4.146 | 0.002 | 0.000 |
| Firmicutes     | Halobacillaceae    | sf_1   | 3849  | Halobacillus litoralis str. SL-4                                     | 4.150 | 0.003 | 0.000 |
| Proteobacteria | Alteromonadaceae   | sf_1   | 9111  | Pseudoalteromonas sp. str. E36                                       | 4.151 | 0.002 | 0.000 |
| Proteobacteria | Nitrosomonadaceae  | sf_1   | 7796  | Nitrosospira sp. str. TYM9                                           | 4.151 | 0.003 | 0.000 |
| Proteobacteria | Pasteurellaceae    | sf_1   | 9533  | Haemophilus segnis str. MCCM 00337                                   | 4.152 | 0.004 | 0.000 |
| Proteobacteria | Rhizobiaceae       | sf_1   | 6964  | Agrobacterium tumefaciens str. C58 Cereon                            | 4.153 | 0.002 | 0.000 |
| Proteobacteria | Xanthomonadaceae   | sf_3   | 8689  | Dyemonas todaii str. XD10                                            | 4.155 | 0.002 | 0.000 |
| Bacteroidetes  | Flavobacteriaceae  | sf_1   | 5730  |                                                                      | 4.155 | 0.002 | 0.000 |
| Bacteroidetes  | Flexibacteraceae   | sf_19  | 5307  | Microscilla sericea str. IFO 16561                                   | 4.155 | 0.004 | 0.000 |
| Proteobacteria | Pseudomonadaceae   | sf_1   | 9240  | Pseudomonas fluorescens str. CHA0                                    | 4.156 | 0.006 | 0.001 |
| Actinobacteria | Bifidobacteriaceae | sf_1   | 1444  | Bifidobacteriaceae genomosp. C1                                      | 4.157 | 0.002 | 0.000 |
| Bacteroidetes  | Unclassified       | sf_4   | 5787  | Mono Lake at depth 35 m station 6 July 2000 clone ML635J-1 bacterium | 4.159 | 0.002 | 0.000 |
| Firmicutes     | Lachnospiraceae    | sf_5   | 4273  | termite gut homogenate clone Rs-M14 bacterium                        | 4.160 | 0.002 | 0.000 |
| marine group A | Unclassified       | sf_1   | 6408  | Sargasso Sea                                                         | 4.162 | 0.002 | 0.000 |
| Planctomycetes | Anammoxales        | sf_2   | 4683  | anoxic basin clone CY0ARA028B09                                      | 4.162 | 0.002 | 0.000 |
| Proteobacteria | Rhodobacteraceae   | sf_1   | 7040  | Paracoccus alcaliphilus str. JCM 7364                                | 4.175 | 0.002 | 0.000 |
| Firmicutes     | Bacillaceae        | sf_1   | 3424  | uranium mill tailings clone Gitt-KF-76                               | 4.178 | 0.002 | 0.000 |
| Unclassified   | Unclassified       | sf_160 | 7767  |                                                                      | 4.181 | 0.003 | 0.000 |
| Proteobacteria | Desulfobacteraceae | sf_5   | 10268 |                                                                      | 4.184 | 0.003 | 0.000 |
| Firmicutes     | Entomoplasmataceae | sf_1   | 4074  | swine intestine clone p-2013-s959-5                                  | 4.185 | 0.002 | 0.000 |
| Chloroflexi    | Unclassified       | sf_2   | 2344  | forest soil clone C083                                               | 4.189 | 0.002 | 0.000 |

|                |                     |       |       |                                                             |       |       |       |
|----------------|---------------------|-------|-------|-------------------------------------------------------------|-------|-------|-------|
| Proteobacteria | Pseudomonadaceae    | sf_1  | 9002  | Paederus fuscipes endosymbiont                              | 4.190 | 0.002 | 0.000 |
| Proteobacteria | Pseudomonadaceae    | sf_1  | 8209  | uranium mining waste pile clone JG37-AG-122 proteobacterium | 4.191 | 0.004 | 0.000 |
| Proteobacteria | Rhodocyclaceae      | sf_1  | 7925  | Thauera selenatis str. ATCC 55363T                          | 4.191 | 0.003 | 0.000 |
| Firmicutes     | Unclassified        | sf_1  | 4616  | rumen clone F23-C12                                         | 4.197 | 0.002 | 0.000 |
| Proteobacteria | Rhizobiaceae        | sf_1  | 6798  | Agrobacterium tumefaciens TG14                              | 4.197 | 0.002 | 0.000 |
| Proteobacteria | Nitrosomonadaceae   | sf_1  | 7976  | Nitrosomonas sp. str. Nm86                                  | 4.197 | 0.003 | 0.000 |
| Proteobacteria | Desulfobacteraceae  | sf_5  | 10364 | marine surface sediment clone SB2                           | 4.197 | 0.002 | 0.000 |
| Actinobacteria | Unclassified        | sf_1  | 1370  | forested wetland clone RCP1-37                              | 4.198 | 0.002 | 0.000 |
| Proteobacteria | Francisellaceae     | sf_1  | 9554  | Tilapia parasite TPT-541                                    | 4.201 | 0.002 | 0.000 |
| Proteobacteria | Desulfobacteraceae  | sf_5  | 10239 |                                                             | 4.201 | 0.003 | 0.000 |
| Proteobacteria | Desulfohalobiaceae  | sf_1  | 9894  | Desulfonauticus submarinus str. 6N                          | 4.201 | 0.004 | 0.000 |
| Proteobacteria | Helicobacteraceae   | sf_3  | 10602 |                                                             | 4.206 | 0.002 | 0.000 |
| Proteobacteria | Pseudomonadaceae    | sf_1  | 8457  | 5' clone CHAB-XI-27                                         | 4.207 | 0.003 | 0.000 |
| Proteobacteria | Halomonadaceae      | sf_1  | 8514  | Chromohalobacter israelensis str. ATCC 43985 T              | 4.210 | 0.004 | 0.000 |
| Proteobacteria | Ralstoniaceae       | sf_1  | 8110  | Wautersia paucula str. LMG 3413                             | 4.211 | 0.002 | 0.000 |
| Acidobacteria  | Acidobacteriaceae   | sf_14 | 6366  | PCB-polluted soil clone WD228                               | 4.213 | 0.003 | 0.000 |
| Proteobacteria | Desulfovibrionaceae | sf_1  | 10016 | termite gut homogenate clone Rs-N35 proteobacterium         | 4.216 | 0.003 | 0.000 |
| Firmicutes     | Streptococcaceae    | sf_1  | 3629  | Streptococcus mutans str. UA96                              | 4.216 | 0.004 | 0.000 |
| Bacteroidetes  | Prevotellaceae      | sf_1  | 5940  | Prevotella sp. str. E7_34                                   | 4.220 | 0.005 | 0.001 |
| Proteobacteria | Unclassified        | sf_3  | 8045  |                                                             | 4.221 | 0.002 | 0.000 |
| Proteobacteria | Alcaligenaceae      | sf_1  | 7902  | Alcaligenes faecalis str. M3A                               | 4.224 | 0.003 | 0.000 |

|                |                       |        |       |                                                        |       |       |       |
|----------------|-----------------------|--------|-------|--------------------------------------------------------|-------|-------|-------|
| Firmicutes     | Clostridiaceae        | sf_12  | 4306  | UASB reactor granular sludge clone PD-UASB-4 bacterium | 4.225 | 0.001 | 0.000 |
| BRC1           | Unclassified          | sf_1   | 5051  | soil clone PBS-III-24                                  | 4.226 | 0.002 | 0.000 |
| Proteobacteria | Unclassified          | sf_3   | 9044  | hydrothermal sediment clone AF420370                   | 4.226 | 0.004 | 0.000 |
| Chloroflexi    | Unclassified          | sf_9   | 727   | forest soil clone S0208                                | 4.230 | 0.002 | 0.000 |
| Firmicutes     | Clostridiaceae        | sf_12  | 4406  | termite gut homogenate clone Rs-J39 bacterium          | 4.232 | 0.001 | 0.000 |
| Proteobacteria | Rhodobacteraceae      | sf_1   | 7026  | Leisingera methylohalidivorans str. MB2                | 4.233 | 0.002 | 0.000 |
| Actinobacteria | Cellulomonadaceae     | sf_1   | 1450  |                                                        | 4.235 | 0.002 | 0.000 |
| Proteobacteria | Rhodobacteraceae      | sf_1   | 6701  | Roseobacter clone NAC11-3                              | 4.236 | 0.002 | 0.000 |
| Actinobacteria | Promicromonosporaceae | sf_1   | 1711  | Promicromonospora sukumoe str. DSM 44121               | 4.238 | 0.002 | 0.000 |
| Proteobacteria | Rhodobacteraceae      | sf_1   | 7125  | Paracoccus carotinifaciens str. E-396                  | 4.240 | 0.002 | 0.000 |
| Firmicutes     | Peptostreptococcaceae | sf_5   | 619   | TCE-dechlorinating microbial community clone 1G        | 4.242 | 0.002 | 0.000 |
| Unclassified   | Unclassified          | sf_160 | 6430  |                                                        | 4.243 | 0.002 | 0.000 |
| Proteobacteria | Unclassified          | sf_1   | 10414 | penguin droppings sediments clone KD2-34               | 4.245 | 0.002 | 0.000 |
| Proteobacteria | Caulobacteraceae      | sf_1   | 6904  | Brevundimonas vesicularis str. IAM 12105T              | 4.248 | 0.004 | 0.000 |
| Proteobacteria | Rhizobiaceae          | sf_1   | 7568  | Rhizobium etli str. USDA 2667 ATCC 14483 SEMIA 043     | 4.248 | 0.001 | 0.000 |
| Proteobacteria | Unclassified          | sf_5   | 7025  | bacterioplankton clone ZA2526c                         | 4.249 | 0.003 | 0.000 |
| Proteobacteria | Enterobacteriaceae    | sf_6   | 433   | coal effluent wetland clone RCP2-6                     | 4.250 | 0.002 | 0.000 |
| Firmicutes     | Unclassified          | sf_1   | 77    | thermal soil clone YNPFFP9                             | 4.251 | 0.003 | 0.000 |
| Firmicutes     | Erysipelothricaceae   | sf_3   | 3952  | Erysipelothrix rhusiopathiae str. Pecs 56              | 4.252 | 0.003 | 0.000 |
| Chloroflexi    | Unclassified          | sf_1   | 374   | forest soil clone S041                                 | 4.253 | 0.002 | 0.000 |
| Firmicutes     | Clostridiaceae        | sf_12  | 3049  | Clostridium paradoxum str. DSM 7308T                   | 4.254 | 0.001 | 0.000 |

|                   |                                  |       |       |                                                        |       |       |       |
|-------------------|----------------------------------|-------|-------|--------------------------------------------------------|-------|-------|-------|
| Firmicutes        | Aerococcaceae                    | sf_1  | 3386  | feedlot manure clone B87                               | 4.255 | 0.004 | 0.000 |
| Cyanobacteria     | Chloroplasts                     | sf_5  | 5182  | Epifagus virginiana -- chloroplast                     | 4.256 | 0.002 | 0.000 |
| Firmicutes        | Streptococcaceae                 | sf_1  | 3722  | Lactococcus Il1403 subsp. lactis str. IL1403           | 4.256 | 0.003 | 0.000 |
| Firmicutes        | Streptococcaceae                 | sf_1  | 3290  | Streptococcus mitis str. Sm91                          | 4.258 | 0.005 | 0.001 |
| Firmicutes        | Aerococcaceae                    | sf_1  | 3522  | Aerococcus viridans                                    | 4.262 | 0.004 | 0.000 |
| Firmicutes        | Streptococcaceae                 | sf_1  | 3753  | Streptococcus suis str. 8074                           | 4.263 | 0.005 | 0.001 |
| Proteobacteria    | Helicobacteraceae                | sf_3  | 10614 | strain isolate str. BHI80-49                           | 4.263 | 0.001 | 0.000 |
| Proteobacteria    | Rhizobiaceae                     | sf_1  | 6972  | Ensifer adhaerens str. LMG 20582                       | 4.264 | 0.001 | 0.000 |
| TM7               | Unclassified                     | sf_1  | 8040  | oral cavity clone BE109                                | 4.265 | 0.004 | 0.000 |
| Actinobacteria    | Streptomycetaceae                | sf_1  | 1354  | Streptomyces subutilus str. DSM 40445                  | 4.266 | 0.001 | 0.000 |
| Bacteroidetes     | Unclassified                     | sf_3  | 6298  | travertine hot spring clone SM1C04                     | 4.268 | 0.002 | 0.000 |
| Chloroflexi       | Unclassified                     | sf_1  | 2367  | deep marine sediment clone MB-B2-113                   | 4.269 | 0.003 | 0.000 |
| Proteobacteria    | Caulobacteraceae                 | sf_1  | 6781  | Brevundimonas intermedia str. MBIC2712 ATCC15262       | 4.270 | 0.003 | 0.000 |
| Bacteroidetes     | Porphyromonadaceae               | sf_1  | 5510  | sphagnum peat bog clone 26-4b2                         | 4.271 | 0.005 | 0.001 |
| Verrucomicrobia   | Verrucomicrobia subdivision 5    | sf_1  | 547   | anoxic marine sediment clone LD1-PB1                   | 4.277 | 0.002 | 0.000 |
| OP10              | Unclassified                     | sf_4  | 484   | forested wetland clone FW68                            | 4.280 | 0.001 | 0.000 |
| Proteobacteria    | Unclassified                     | sf_1  | 7750  | uranium mining waste clone JG37-AG-35                  | 4.283 | 0.001 | 0.000 |
| Bacteroidetes     | Unclassified                     | sf_15 | 5874  | hydrothermal vent polychaete mucous clone P. palm A 53 | 4.284 | 0.003 | 0.000 |
| Proteobacteria    | Beijerinck/Rhodoplan/Methylocyst | sf_3  | 7239  | Thalassospira lucentensis                              | 4.284 | 0.004 | 0.000 |
| Acidobacteria     | Acidobacteriaceae                | sf_6  | 6359  | PCE-contaminated site clone CLi114                     | 4.287 | 0.002 | 0.000 |
| Natronoanaerobium | Unclassified                     | sf_1  | 769   | fjord ikaite column clone un-c23                       | 4.292 | 0.002 | 0.000 |

|                |                       |        |      |                                               |       |       |       |
|----------------|-----------------------|--------|------|-----------------------------------------------|-------|-------|-------|
| Bacteroidetes  | Unclassified          | sf_4   | 5703 |                                               | 4.297 | 0.003 | 0.000 |
| Actinobacteria | Promicromonosporaceae | sf_1   | 1671 | Cellulosimicrobium cellulans str. NCIMB 11025 | 4.301 | 0.002 | 0.000 |
| Firmicutes     | Clostridiaceae        | sf_12  | 4225 | termite gut clone Rs-116                      | 4.301 | 0.002 | 0.000 |
| Proteobacteria | Caulobacteraceae      | sf_1   | 7359 | Brevundimonas bacteroides str. CB7            | 4.302 | 0.003 | 0.000 |
| Proteobacteria | Caulobacteraceae      | sf_1   | 7366 | Brevundimonas subvibrioides str. CB81         | 4.302 | 0.003 | 0.000 |
| Proteobacteria | Comamonadaceae        | sf_1   | 8012 | Acidovorax konjaci str. DSM 7481              | 4.304 | 0.001 | 0.000 |
| Proteobacteria | Rhodocyclaceae        | sf_1   | 7951 | EBPR sludge lab scale clone HP1A03            | 4.304 | 0.003 | 0.000 |
| Unclassified   | Unclassified          | sf_160 | 2488 |                                               | 4.307 | 0.002 | 0.000 |
| Proteobacteria | Rhodobacteraceae      | sf_1   | 6980 | Loktanelia vestfoldensis str. LMG 22003       | 4.308 | 0.001 | 0.000 |
| Caldithrix     | Caldithraceae         | sf_1   | 2384 | saltmarsh clone LCP-89                        | 4.309 | 0.001 | 0.000 |
| Bacteroidetes  | Prevotellaceae        | sf_1   | 5926 | cow rumen clone BF22                          | 4.310 | 0.004 | 0.000 |
| Proteobacteria | Caulobacteraceae      | sf_1   | 6909 | Brevundimonas diminuta str. DSM 1635          | 4.310 | 0.003 | 0.000 |
| Spirochaetes   | Spirochaetaceae       | sf_1   | 6479 | Treponema sp                                  | 4.312 | 0.001 | 0.000 |
| Proteobacteria | Piscirickettsiaceae   | sf_3   | 9291 | Methylophaga alcalica str. M39                | 4.313 | 0.002 | 0.000 |
| Proteobacteria | Aeromonadaceae        | sf_1   | 9294 | Arctic deep sea (HMMV 72N 14E))               | 4.314 | 0.004 | 0.000 |
| Proteobacteria | Alteromonadaceae      | sf_1   | 8536 | Cardiobacterium hominis                       | 4.315 | 0.002 | 0.000 |
| Proteobacteria | Alteromonadaceae      | sf_1   | 8578 | Marinobacter lipolyticus str. SM-19           | 4.317 | 0.003 | 0.000 |
| Actinobacteria | Cellulomonadaceae     | sf_1   | 1431 | Cellulomonadaceae str. W6                     | 4.317 | 0.001 | 0.000 |
| Chlamydiae     | Parachlamydiaceae     | sf_1   | 4964 | neutral pH mine biofilm clone 44a-B1-34       | 4.318 | 0.003 | 0.000 |
| Firmicutes     | Streptococcaceae      | sf_1   | 3499 | Streptococcus constellatus str. ATCC27823     | 4.318 | 0.004 | 0.000 |
| Acidobacteria  | Unclassified          | sf_1   | 523  | soil metagenomic library clone 17F9           | 4.320 | 0.001 | 0.000 |



|                |                         |       |       |                                                           |       |       |       |
|----------------|-------------------------|-------|-------|-----------------------------------------------------------|-------|-------|-------|
| Firmicutes     | Peptostreptococcaceae   | sf_5  | 224   | Finegoldia magna str. ATCC 29328                          | 4.323 | 0.001 | 0.000 |
| Proteobacteria | Desulfomicrobiaceae     | sf_1  | 10079 | Desulfomicrobium baculatum str. DSM 1742                  | 4.324 | 0.002 | 0.000 |
| Proteobacteria | Unclassified            | sf_3  | 8959  | bacterioplankton clone AEGEAN_133                         | 4.327 | 0.002 | 0.000 |
| Bacteroidetes  | Prevotellaceae          | sf_1  | 5398  | Prevotella ruminicola L16                                 | 4.329 | 0.004 | 0.000 |
| Proteobacteria | Caulobacteraceae        | sf_1  | 7436  | Brevundimonas sp. str. FWC40                              | 4.329 | 0.003 | 0.000 |
| Firmicutes     | Peptostreptococcaceae   | sf_5  | 668   | Sedimentibacter sp. str. BRS2                             | 4.331 | 0.001 | 0.000 |
| Actinobacteria | Actinomycetaceae        | sf_1  | 1684  | Varibaculum cambriense str. CCUG 44998                    | 4.337 | 0.001 | 0.000 |
| Firmicutes     | Erysipelotrichaceae     | sf_3  | 144   | Eubacterium cylindroides                                  | 4.338 | 0.002 | 0.000 |
| Proteobacteria | Unclassified            | sf_9  | 244   | deep marine sediment clone MB-C2-152                      | 4.339 | 0.003 | 0.000 |
| Proteobacteria | Desulfovibrionaceae     | sf_1  | 9709  | termite gut homogenate clone Rs-N31 proteobacterium       | 4.345 | 0.002 | 0.000 |
| Actinobacteria | Bifidobacteriaceae      | sf_1  | 1351  | Bifidobacterium psychraerophilum str. T16                 | 4.346 | 0.002 | 0.000 |
| WS3            | Unclassified            | sf_1  | 2537  | anoxic marine sediment clone LD1-PA39                     | 4.347 | 0.003 | 0.000 |
| Firmicutes     | Bacillaceae             | sf_1  | 3650  |                                                           | 4.351 | 0.004 | 0.000 |
| Firmicutes     | Lachnospiraceae         | sf_5  | 3038  | swine intestine clone p-1594-c5                           | 4.351 | 0.002 | 0.000 |
| Proteobacteria | Thiotrichaceae          | sf_3  | 8321  | Wadden Sea sediment clone Dangast A9                      | 4.351 | 0.002 | 0.000 |
| Proteobacteria | Comamonadaceae          | sf_1  | 7705  | penguin droppings sediments clone KD4-7                   | 4.353 | 0.002 | 0.000 |
| Firmicutes     | Peptococc/Acidaminococc | sf_11 | 992   | anoxic bulk soil flooded rice microcosm clone BSV43 clone | 4.354 | 0.003 | 0.000 |
| Acidobacteria  | Unclassified            | sf_1  | 516   | uranium mining waste pile clone JG34-KF-153               | 4.354 | 0.002 | 0.000 |
| Proteobacteria | Unclassified            | sf_1  | 9828  | termite gut homogenate clone Rs-M89 proteobacterium       | 4.355 | 0.002 | 0.000 |
| Firmicutes     | Unclassified            | sf_8  | 2433  | Ferribacter thermoautotrophicus str. JW/JH-Fiji-2         | 4.356 | 0.002 | 0.000 |
| Proteobacteria | Unclassified            | sf_9  | 9890  | termite gut homogenate clone Rs-K70 proteobacterium       | 4.356 | 0.002 | 0.000 |

|                |                     |       |       |                                                            |       |       |       |
|----------------|---------------------|-------|-------|------------------------------------------------------------|-------|-------|-------|
| Bacteroidetes  | Unclassified        | sf_15 | 5544  | marine? clone KD3-17                                       | 4.357 | 0.001 | 0.000 |
| Firmicutes     | Streptococcaceae    | sf_1  | 3422  | Streptococcus thermophilus str. DSM 20617                  | 4.358 | 0.003 | 0.000 |
| Proteobacteria | Phyllobacteriaceae  | sf_1  | 7216  | Ahrensia kielensis str. IAM12618                           | 4.359 | 0.001 | 0.000 |
| Spirochaetes   | Spirochaetaceae     | sf_1  | 6580  | Treponema sp. str. III:C:BA213                             | 4.359 | 0.001 | 0.000 |
| Planctomycetes | Planctomycetaceae   | sf_3  | 4652  | anoxic basin clone CY0ARA028C04                            | 4.369 | 0.002 | 0.000 |
| Firmicutes     | Bacillaceae         | sf_1  | 3370  | Bacillus sp. str. TGS437                                   | 4.374 | 0.001 | 0.000 |
| Proteobacteria | Bartonellaceae      | sf_1  | 7415  | Bartonella quintana str. Toulouse                          | 4.375 | 0.001 | 0.000 |
| Acidobacteria  | Acidobacteriaceae   | sf_6  | 6423  | coal effluent wetland clone FW92                           | 4.376 | 0.002 | 0.000 |
| Proteobacteria | Polyangiaceae       | sf_3  | 9735  | uranium mining waste pile clone JG37-AG-15 proteobacterium | 4.376 | 0.002 | 0.000 |
| Proteobacteria | Unclassified        | sf_3  | 8676  |                                                            | 4.377 | 0.003 | 0.000 |
| AD3            | Unclassified        | sf_1  | 2338  | uranium mining waste pile soil clone JG30-KF-C12           | 4.378 | 0.001 | 0.000 |
| Cyanobacteria  | Chloroplasts        | sf_5  | 5130  | travertine hot spring clone SM2B11                         | 4.380 | 0.001 | 0.000 |
| Proteobacteria | Unclassified        | sf_1  | 8408  | Thiorhodovibrio winogradskyi                               | 4.384 | 0.003 | 0.000 |
| Firmicutes     | Bacillaceae         | sf_1  | 3898  | compost clone 4-28                                         | 4.390 | 0.001 | 0.000 |
| Chloroflexi    | Unclassified        | sf_1  | 266   |                                                            | 4.391 | 0.001 | 0.000 |
| Bacteroidetes  | Prevotellaceae      | sf_1  | 5706  | oral cavity clone 3.3                                      | 4.391 | 0.005 | 0.001 |
| OP3            | Unclassified        | sf_4  | 628   | CB-contaminated groundwater clone GOUTB15                  | 4.392 | 0.002 | 0.000 |
| Proteobacteria | Desulfovibrionaceae | sf_1  | 10071 | Desulfovibrio desulfuricans                                | 4.393 | 0.001 | 0.000 |
| Firmicutes     | Bacillaceae         | sf_1  | 3688  | Bacillus sp. str. SAFN-006                                 | 4.394 | 0.001 | 0.000 |
| Proteobacteria | Unclassified        | sf_4  | 8855  |                                                            | 4.395 | 0.003 | 0.000 |
| Firmicutes     | Bacillaceae         | sf_1  | 3579  | Bacillus sp. str. TGS750                                   | 4.395 | 0.001 | 0.000 |

|                  |                       |       |      |                                                             |       |       |       |
|------------------|-----------------------|-------|------|-------------------------------------------------------------|-------|-------|-------|
| Proteobacteria   | Rhodobacteraceae      | sf_1  | 6652 | marine clone Arctic96A-1                                    | 4.396 | 0.001 | 0.000 |
| Proteobacteria   | Pasteurellaceae       | sf_1  | 9604 | Mannheimia sp. MCCM 00145                                   | 4.396 | 0.003 | 0.000 |
| Proteobacteria   | Piscirickettsiaceae   | sf_3  | 9392 | Methylophaga sp. str. V4.ME.29 = MM_2343                    | 4.396 | 0.001 | 0.000 |
| Planctomycetes   | Pirellulae            | sf_3  | 4692 | aerobic basin clone CY0ARA026G04                            | 4.399 | 0.003 | 0.000 |
| Proteobacteria   | Unclassified          | sf_1  | 9458 | uranium mining waste pile clone JG37-AG-94 proteobacterium  | 4.399 | 0.002 | 0.000 |
| Firmicutes       | Peptostreptococcaceae | sf_5  | 3182 | termite gut homogenate clone Rs-Q64 bacterium               | 4.399 | 0.001 | 0.000 |
| Bacteroidetes    | Unclassified          | sf_15 | 5573 | termite gut homogenate clone Rs-D44 bacterium               | 4.400 | 0.001 | 0.000 |
| Acidobacteria    | Unclassified          | sf_1  | 572  | forested wetland clone FW144                                | 4.401 | 0.002 | 0.000 |
| Gemmatimonadetes | Unclassified          | sf_5  | 1565 | uranium mining waste pile clone JG34-KF-418                 | 4.405 | 0.001 | 0.000 |
| Spirochaetes     | Spirochaetaceae       | sf_1  | 6459 | Spirochaeta sp. str. BH180-158                              | 4.408 | 0.002 | 0.000 |
| Actinobacteria   | Rubrobacteraceae      | sf_1  | 1843 | uranium mining waste pile soil sample clone JG30-KF-A23     | 4.408 | 0.002 | 0.000 |
| Bacteroidetes    | Unclassified          | sf_15 | 5820 | cow rumen clone BF24                                        | 4.409 | 0.002 | 0.000 |
| Proteobacteria   | Comamonadaceae        | sf_1  | 7986 | Arctic sea ice ARK10281                                     | 4.414 | 0.002 | 0.000 |
| Proteobacteria   | Xanthomonadaceae      | sf_3  | 9277 | penguin droppings sediment clone KD8-68                     | 4.415 | 0.002 | 0.000 |
| Proteobacteria   | Unclassified          | sf_1  | 9246 | Mammoth Cave sediment clone CCD24                           | 4.416 | 0.002 | 0.000 |
| Firmicutes       | Peptostreptococcaceae | sf_5  | 2721 | termite gut homogenate clone Rs-N71 bacterium               | 4.416 | 0.001 | 0.000 |
| Firmicutes       | Streptococcaceae      | sf_1  | 3588 | Streptococcus downei str. ATCC 33748                        | 4.417 | 0.003 | 0.000 |
| Bacteroidetes    | Prevotellaceae        | sf_1  | 5916 | cow rumen clone BE14                                        | 4.419 | 0.004 | 0.000 |
| marine group A   | Unclassified          | sf_1  | 6344 | bacterioplankton clone ZA3648c                              | 4.421 | 0.001 | 0.000 |
| Proteobacteria   | Unclassified          | sf_6  | 7377 | Rocky Mountain alpine soil clone W2b-8C                     | 4.423 | 0.002 | 0.000 |
| Proteobacteria   | Polyangiaceae         | sf_3  | 9874 | uranium mining waste pile clone JG34-KF-243 proteobacterium | 4.424 | 0.001 | 0.000 |

|                  |                      |        |       |                                                                             |       |       |       |
|------------------|----------------------|--------|-------|-----------------------------------------------------------------------------|-------|-------|-------|
| Proteobacteria   | Desulfobulbaceae     | sf_1   | 10187 | Mono Lake at depth 23 m station 6 July 2000 clone ML623J-57 proteobacterium | 4.424 | 0.002 | 0.000 |
| Bacteroidetes    | Prevotellaceae       | sf_1   | 5403  | Prevotella bryantii str. B14 (DSM 11371 species )                           | 4.425 | 0.002 | 0.000 |
| Proteobacteria   | Helicobacteraceae    | sf_3   | 10417 | temperate estuarine mud clone KM61                                          | 4.425 | 0.001 | 0.000 |
| Proteobacteria   | Rhodobacteraceae     | sf_1   | 6888  | hydrothermal vent strain str. TB66                                          | 4.425 | 0.002 | 0.000 |
| Unclassified     | Unclassified         | sf_160 | 6456  |                                                                             | 4.426 | 0.001 | 0.000 |
| Firmicutes       | Clostridiaceae       | sf_12  | 3219  | Great Artesian Basin clone R82                                              | 4.429 | 0.001 | 0.000 |
| Actinobacteria   | Streptomycetaceae    | sf_1   | 1639  | Streptomyces coelicolor str. M145 ssp. A3(2)                                | 4.432 | 0.002 | 0.000 |
| Verrucomicrobia  | Unclassified         | sf_3   | 792   | termite gut homogenate clone Rs-P07 bacterium                               | 4.438 | 0.001 | 0.000 |
| Proteobacteria   | Pasteurellaceae      | sf_1   | 8614  | Acidithiobacillus thiooxidans str. KCTC 8928P                               | 4.438 | 0.001 | 0.000 |
| Gemmatimonadetes | Unclassified         | sf_5   | 317   | penguin droppings sediments clone KD8-87                                    | 4.440 | 0.002 | 0.000 |
| Cyanobacteria    | Unclassified         | sf_1   | 5001  | sponge clone TK09                                                           | 4.444 | 0.003 | 0.000 |
| Proteobacteria   | Unclassified         | sf_9   | 9738  | marine methane seep clone 1513                                              | 4.444 | 0.002 | 0.000 |
| Actinobacteria   | Streptosporangiaceae | sf_1   | 1224  | Acrocarpospora corrugata str. DSM43316T                                     | 4.448 | 0.002 | 0.000 |
| Chloroflexi      | Unclassified         | sf_1   | 765   | anaerobic bioreactor clone SHD-71                                           | 4.449 | 0.001 | 0.000 |
| Bacteroidetes    | Flexibacteraceae     | sf_20  | 10311 | Cytophaga sp. str. BHI60-57B                                                | 4.450 | 0.001 | 0.000 |
| Proteobacteria   | Phyllobacteriaceae   | sf_1   | 6857  | Mesorhizobium mediterraneum str. PECA20                                     | 4.453 | 0.001 | 0.000 |
| Proteobacteria   | Anaplasmataceae      | sf_3   | 6648  | Wolbachia sp                                                                | 4.454 | 0.002 | 0.000 |
| Proteobacteria   | Unclassified         | sf_4   | 6810  | marine bacterioplankton clone MB13F01                                       | 4.454 | 0.001 | 0.000 |
| Bacteroidetes    | Prevotellaceae       | sf_1   | 5437  | cow rumen clone BE1                                                         | 4.454 | 0.003 | 0.000 |
| Gemmatimonadetes | Unclassified         | sf_5   | 227   | uranium mining waste pile clone JG37-AG-36                                  | 4.456 | 0.001 | 0.000 |
| Acidobacteria    | Acidobacteriaceae    | sf_14  | 6335  | forested wetland clone FW45                                                 | 4.456 | 0.001 | 0.000 |

|                 |                    |       |      |                                                             |       |       |       |
|-----------------|--------------------|-------|------|-------------------------------------------------------------|-------|-------|-------|
| Bacteroidetes   | Prevotellaceae     | sf_1  | 5769 | Bacteroidaceae str. A42                                     | 4.458 | 0.004 | 0.000 |
| Firmicutes      | Bacillaceae        | sf_1  | 3926 | Lake Bogoria isolate 64B4                                   | 4.459 | 0.001 | 0.000 |
| Proteobacteria  | Unclassified       | sf_9  | 9876 | deep marine sediment clone MB-B2-106                        | 4.461 | 0.002 | 0.000 |
| Bacteroidetes   | Unclassified       | sf_3  | 6168 | Toolik Lake main station at 3 m depth clone TLM11/TLMdgge04 | 4.461 | 0.003 | 0.000 |
| Bacteroidetes   | Flavobacteriaceae  | sf_1  | 5933 | Flavobacterium columnare str. PH-97028 (IAM 14821)          | 4.462 | 0.003 | 0.000 |
| Chloroflexi     | Unclassified       | sf_1  | 2497 | forested wetland clone FW60                                 | 4.464 | 0.003 | 0.000 |
| Firmicutes      | Acholeplasmataceae | sf_1  | 3955 | Weeping tea tree witches'-broom phytoplasma tree            | 4.464 | 0.003 | 0.000 |
| Chloroflexi     | Unclassified       | sf_9  | 946  | temperate estuarine mud clone KM87                          | 4.465 | 0.001 | 0.000 |
| Proteobacteria  | Nitrosomonadaceae  | sf_1  | 7770 | Nitrosomonas europaea str. ATCC 19718                       | 4.465 | 0.001 | 0.000 |
| Bacteroidetes   | Unclassified       | sf_15 | 5957 | hydrothermal vent polychaete mucous clone P. palm C/A 20    | 4.467 | 0.002 | 0.000 |
| Bacteroidetes   | Unclassified       | sf_15 | 5475 | SHA-25 clone                                                | 4.468 | 0.002 | 0.000 |
| Proteobacteria  | Burkholderiaceae   | sf_1  | 7720 | penguin droppings sediments clone KD1-79                    | 4.468 | 0.002 | 0.000 |
| Firmicutes      | Unclassified       | sf_17 | 4168 |                                                             | 4.469 | 0.002 | 0.000 |
| Proteobacteria  | Chromatiaceae      | sf_1  | 8697 | Thiococcus sp. AT2204                                       | 4.472 | 0.003 | 0.000 |
| Actinobacteria  | Dermabacteraceae   | sf_1  | 1677 | Brachybacterium conglomeratum str. NCIB 9859                | 4.472 | 0.001 | 0.000 |
| Proteobacteria  | Chromatiaceae      | sf_1  | 9052 |                                                             | 4.473 | 0.002 | 0.000 |
| Proteobacteria  | Oxalobacteraceae   | sf_1  | 7845 | Diaphorina citri symbiont                                   | 4.473 | 0.003 | 0.000 |
| Bacteroidetes   | Flexibacteraceae   | sf_19 | 5366 | Flexibacter roseolus str. IFO 16030                         | 4.474 | 0.001 | 0.000 |
| Actinobacteria  | Micrococcaceae     | sf_1  | 1573 | Arthrobacter nicotianae str. SB42                           | 4.474 | 0.001 | 0.000 |
| Proteobacteria  | Unclassified       | sf_1  | 7766 |                                                             | 4.475 | 0.001 | 0.000 |
| Verrucomicrobia | Unclassified       | sf_3  | 486  | Elbe river clone DEV045                                     | 4.475 | 0.001 | 0.000 |

|                 |                     |        |      |                                                                             |       |       |       |
|-----------------|---------------------|--------|------|-----------------------------------------------------------------------------|-------|-------|-------|
| Firmicutes      | Paenibacillaceae    | sf_1   | 3922 | Paenibacillus thiaminolyticus str. DSM 7262                                 | 4.476 | 0.001 | 0.000 |
| Firmicutes      | Aerococcaceae       | sf_1   | 3736 | Desemzia incerta str. DSM 20581                                             | 4.482 | 0.001 | 0.000 |
| Proteobacteria  | Unclassified        | sf_1   | 8839 | f cytometric sorted marine sample subpopulation 3 clone ZD0408 bacterium    | 4.485 | 0.002 | 0.000 |
| Proteobacteria  | Unclassified        | sf_3   | 9269 |                                                                             | 4.486 | 0.001 | 0.000 |
| Proteobacteria  | Rhizobiaceae        | sf_1   | 6974 | India: Himalayas Kaza Spiti Valley Cold Desert isolate str. Kaza-35 Kaza-35 | 4.486 | 0.001 | 0.000 |
| Unclassified    | Unclassified        | sf_140 | 6355 |                                                                             | 4.486 | 0.001 | 0.000 |
| Actinobacteria  | Acidothermaceae     | sf_1   | 1399 | uranium mill tailings clone Gitt-KF-183                                     | 4.488 | 0.001 | 0.000 |
| Bacteroidetes   | Unclassified        | sf_6   | 5439 | Mono Lake clone ML635J-40 bacterium                                         | 4.490 | 0.001 | 0.000 |
| Acidobacteria   | Acidobacteriaceae   | sf_6   | 6345 | clone JG36-TzT-77 bacterium                                                 | 4.491 | 0.001 | 0.000 |
| Firmicutes      | Acholeplasmataceae  | sf_1   | 3977 | Chinaberry yellows phytoplasma str. CbY1                                    | 4.492 | 0.001 | 0.000 |
| Actinobacteria  | Micrococcaceae      | sf_1   | 2063 | Rothia dentocariosa str. ATCC 17931                                         | 4.492 | 0.002 | 0.000 |
| Proteobacteria  | Phyllobacteriaceae  | sf_1   | 7381 | Aminobacter aminovorans str. DSM7048T                                       | 4.494 | 0.001 | 0.000 |
| Actinobacteria  | Unclassified        | sf_3   | 1486 | deep marine sediment clone MB-A2-108                                        | 4.496 | 0.002 | 0.000 |
| Planctomycetes  | Pirellulae          | sf_3   | 4803 | Pirellula sp. str. ACM 3181                                                 | 4.497 | 0.002 | 0.000 |
| Bacteroidetes   | Unclassified        | sf_15  | 5511 | marine sediment above hydrate ridge clone Hyd-B2-1 bacterium                | 4.501 | 0.004 | 0.000 |
| Thermotogae     | Thermotogaceae      | sf_4   | 51   | Thermosipho sp. str. MV1063                                                 | 4.501 | 0.002 | 0.000 |
| Verrucomicrobia | Verrucomicrobiaceae | sf_1   | 1024 | rumen clone BS5                                                             | 4.501 | 0.001 | 0.000 |
| Firmicutes      | Erysipelotrichaceae | sf_3   | 768  |                                                                             | 4.502 | 0.001 | 0.000 |
| Firmicutes      | Clostridiaceae      | sf_12  | 4584 | Clostridium papyrosolvans str. DSM 2782                                     | 4.502 | 0.001 | 0.000 |
| Proteobacteria  | Chromatiaceae       | sf_1   | 8546 | Thiocapsa litoralis                                                         | 4.502 | 0.002 | 0.000 |
| Bacteroidetes   | Unclassified        | sf_15  | 6324 | temperate estuarine mud clone KM02                                          | 4.505 | 0.003 | 0.000 |

|                |                        |       |       |                                                               |       |       |       |
|----------------|------------------------|-------|-------|---------------------------------------------------------------|-------|-------|-------|
| Cyanobacteria  | Chloroplasts           | sf_5  | 5112  | Cyanidium caldarium str. 14-1-1                               | 4.505 | 0.002 | 0.000 |
| Firmicutes     | Carnobacteriaceae      | sf_1  | 3792  | Carnobacterium sp. str. D35                                   | 4.506 | 0.002 | 0.000 |
| Cyanobacteria  | Chloroplasts           | sf_5  | 4967  | Toolik Lake main station at 3 m depth clone TLM14             | 4.509 | 0.003 | 0.000 |
| Firmicutes     | Clostridiaceae         | sf_12 | 10457 | strain isolate str. Dex60-82                                  | 4.512 | 0.001 | 0.000 |
| Chloroflexi    | Unclassified           | sf_1  | 1041  | Antarctic cryptoendolith clone FBP471                         | 4.513 | 0.001 | 0.000 |
| Proteobacteria | Alcanivoraceae         | sf_1  | 9658  | Alcanivorax sp. str. Haw1                                     | 4.514 | 0.002 | 0.000 |
| Firmicutes     | Bacillaceae            | sf_1  | 1050  | Bacillus firmus CV93b                                         | 4.517 | 0.002 | 0.000 |
| Proteobacteria | Alteromonadaceae       | sf_1  | 9416  | marine isolate str. R8                                        | 4.517 | 0.002 | 0.000 |
| Firmicutes     | Thermoactinomycetaceae | sf_1  | 3301  | Thermoactinomyces sp. str. 700375                             | 4.523 | 0.004 | 0.000 |
| Proteobacteria | Unclassified           | sf_1  | 8231  | uranium waste soil clone JG30a-KF-21                          | 4.529 | 0.001 | 0.000 |
| Firmicutes     | Lachnospiraceae        | sf_5  | 3060  | termite gut homogenate clone Rs-B14 bacterium                 | 4.530 | 0.002 | 0.000 |
| Fusobacteria   | Fusobacteriaceae       | sf_3  | 387   | Leptotrichia wadeii str. LB16                                 | 4.530 | 0.003 | 0.000 |
| Proteobacteria | Pseudomonadaceae       | sf_1  | 9049  | uranium mining mill tailing clone GR-Sh2-34 GR-Sh2-34         | 4.531 | 0.002 | 0.000 |
| Cyanobacteria  | Chloroplasts           | sf_5  | 5040  | Solanum nigrum                                                | 4.535 | 0.001 | 0.000 |
| Firmicutes     | Clostridiaceae         | sf_12 | 4357  | Lachnospiraceae bacterium 19gly4                              | 4.536 | 0.001 | 0.000 |
| Proteobacteria | Comamonadaceae         | sf_1  | 7928  | penguin droppings sediments clone KD5-43                      | 4.541 | 0.001 | 0.000 |
| Bacteroidetes  | Sphingobacteriaceae    | sf_1  | 6158  | municipal wastewater treatment bioreactor isolate str. CAGY10 | 4.545 | 0.002 | 0.000 |
| Acidobacteria  | Acidobacteriaceae      | sf_14 | 6425  | Great Artesian Basin clone B27                                | 4.548 | 0.001 | 0.000 |
| Bacteroidetes  | Flavobacteriaceae      | sf_1  | 5423  | Aequorivita antarctica str. QSSC9-14                          | 4.549 | 0.001 | 0.000 |
| Proteobacteria | Unclassified           | sf_5  | 7471  | sponge clone TK03                                             | 4.551 | 0.001 | 0.000 |
| Proteobacteria | Pseudomonadaceae       | sf_1  | 8635  |                                                               | 4.552 | 0.002 | 0.000 |

|                |                     |       |       |                                               |       |       |       |
|----------------|---------------------|-------|-------|-----------------------------------------------|-------|-------|-------|
| TM7            | Unclassified        | sf_1  | 8155  | oral periodontitis clone EW086                | 4.553 | 0.002 | 0.000 |
| Proteobacteria | Myxococcaceae       | sf_1  | 10358 | Myxococcus fulvus str. Mx f2                  | 4.554 | 0.002 | 0.000 |
| Firmicutes     | Lachnospiraceae     | sf_5  | 4535  | ckncm297-B1-1 clone                           | 4.555 | 0.001 | 0.000 |
| Proteobacteria | Chromatiaceae       | sf_1  | 9054  |                                               | 4.556 | 0.003 | 0.000 |
| Firmicutes     | Syntrophomonadaceae | sf_5  | 2456  | granular sludge clone R4b14                   | 4.557 | 0.003 | 0.000 |
| Acidobacteria  | Acidobacteriaceae   | sf_14 | 6378  | Acidobacterium capsulatum                     | 4.557 | 0.002 | 0.000 |
| Firmicutes     | Paenibacillaceae    | sf_1  | 3415  | Paenibacillus nematophilus str. NEM1b         | 4.557 | 0.001 | 0.000 |
| Firmicutes     | Unclassified        | sf_8  | 546   | Ferribacter thermoautotrophicus               | 4.560 | 0.001 | 0.000 |
| Firmicutes     | Clostridiaceae      | sf_12 | 3108  | Clostridium paradoxum str. DSM 7308T          | 4.561 | 0.001 | 0.000 |
| NC10           | Unclassified        | sf_1  | 2516  | TCE-contaminated site clone FTL22             | 4.564 | 0.001 | 0.000 |
| SPAM           | Unclassified        | sf_1  | 705   | uranium tailings soil clone Sh765B-AG-45      | 4.564 | 0.001 | 0.000 |
| Proteobacteria | Pseudomonadaceae    | sf_1  | 9613  | Pseudomonas flavescens str. B62               | 4.567 | 0.002 | 0.000 |
| Firmicutes     | Clostridiaceae      | sf_12 | 4548  | termite gut homogenate clone Rs-Q69 bacterium | 4.567 | 0.001 | 0.000 |
| Proteobacteria | SAR11               | sf_2  | 7043  | marine clone Arctic95D-8                      | 4.568 | 0.001 | 0.000 |
| Firmicutes     | Aerococcaceae       | sf_1  | 3866  | Turicibacter sanguinis                        | 4.568 | 0.001 | 0.000 |
| Actinobacteria | Micrococcaceae      | sf_1  | 1324  | glacial ice isolate str. CanDirty1            | 4.569 | 0.001 | 0.000 |
| Actinobacteria | Micrococcaceae      | sf_1  | 1266  | Arthrobacter psychrolactophilus               | 4.575 | 0.001 | 0.000 |
| Actinobacteria | Streptomycetaceae   | sf_1  | 1274  | Trichotomospora caesia str. IFO14562          | 4.578 | 0.001 | 0.000 |
| Firmicutes     | Lachnospiraceae     | sf_5  | 2709  | human stool clone B065                        | 4.580 | 0.001 | 0.000 |
| Proteobacteria | Helicobacteraceae   | sf_3  | 10425 | Sulfurimonas autotrophica str. OK5            | 4.587 | 0.001 | 0.000 |
| Firmicutes     | Unclassified        | sf_4  | 4325  | termite gut homogenate clone Rs-K21 bacterium | 4.588 | 0.001 | 0.000 |



|                 |                               |       |      |                                                             |       |       |       |
|-----------------|-------------------------------|-------|------|-------------------------------------------------------------|-------|-------|-------|
| Proteobacteria  | Procabacteriaceae             | sf_1  | 8136 | Acanthamoeba sp. UWC6 symbiont                              | 4.588 | 0.001 | 0.000 |
| Proteobacteria  | Syntrophobacteraceae          | sf_1  | 9845 | uranium mining waste pile clone JG37-AG-128 proteobacterium | 4.593 | 0.002 | 0.000 |
| Proteobacteria  | Unclassified                  | sf_3  | 8587 | Mars Odyssey Orbiter and encapsulation facility clone T5-3  | 4.594 | 0.003 | 0.000 |
| Firmicutes      | Lactobacillaceae              | sf_1  | 3829 | Lactobacillus paralimentarius str. DSM 13238                | 4.597 | 0.002 | 0.000 |
| Firmicutes      | Peptococc/Acidaminococc       | sf_11 | 131  | pig feces clone                                             | 4.600 | 0.002 | 0.000 |
| Proteobacteria  | Unclassified                  | sf_1  | 6732 | Anabaena circinalis AWQC118C isolate str. UNSW7             | 4.604 | 0.001 | 0.000 |
| Proteobacteria  | Unclassified                  | sf_3  | 8961 | Calyptogenia magnifica symbiont                             | 4.604 | 0.002 | 0.000 |
| Proteobacteria  | Sphingomonadaceae             | sf_1  | 7528 | Sphingobium yanoikuyae str. GIFU9882                        | 4.606 | 0.001 | 0.000 |
| Proteobacteria  | Alcaligenaceae                | sf_1  | 8094 | Alcaligenes sp. str. VKM B-2263 dcm6                        | 4.609 | 0.003 | 0.000 |
| Firmicutes      | Streptococcaceae              | sf_1  | 3253 | derived cheese sample clone 32CR                            | 4.609 | 0.003 | 0.000 |
| Actinobacteria  | Micrococcaceae                | sf_1  | 1889 | Citricoccus sp. str. 2216.25.22                             | 4.610 | 0.001 | 0.000 |
| Firmicutes      | Lachnospiraceae               | sf_5  | 4164 | ckncm322-B3-7 clone                                         | 4.615 | 0.001 | 0.000 |
| Actinobacteria  | Cellulomonadaceae             | sf_1  | 1586 | Cellulomonas gelida str. DSM 20111T                         | 4.615 | 0.001 | 0.000 |
| Verrucomicrobia | Verrucomicrobia subdivision 7 | sf_1  | 760  | Mono lake clone ML316M-1                                    | 4.617 | 0.001 | 0.000 |
| Acidobacteria   | Acidobacteriaceae             | sf_14 | 964  | uranium mining waste pile clone JG37-AG-145 sp.             | 4.626 | 0.001 | 0.000 |
| Proteobacteria  | Acetobacteraceae              | sf_1  | 7529 | Gluconacetobacter europaeus str. ZIM B028 V3                | 4.627 | 0.001 | 0.000 |
| Proteobacteria  | Oceanospirillaceae            | sf_1  | 9351 | bacterioplankton clone ZA2333c                              | 4.628 | 0.003 | 0.000 |
| Proteobacteria  | Unclassified                  | sf_6  | 7572 |                                                             | 4.629 | 0.002 | 0.000 |
| Firmicutes      | Bacillaceae                   | sf_1  | 3467 | Bacillus luciferensis str. LMG 18422                        | 4.632 | 0.001 | 0.000 |
| Firmicutes      | Clostridiaceae                | sf_12 | 4364 | oral endodontic infection clone MCE3_9                      | 4.634 | 0.001 | 0.000 |
| Bacteroidetes   | Sphingobacteriaceae           | sf_1  | 5513 | crevicular epithelial cells clone AZ123                     | 4.636 | 0.001 | 0.000 |

|                 |                               |       |       |                                                          |       |       |       |
|-----------------|-------------------------------|-------|-------|----------------------------------------------------------|-------|-------|-------|
| Proteobacteria  | Chromatiaceae                 | sf_1  | 9048  | Allochrochromatium sp. AT2202                            | 4.637 | 0.001 | 0.000 |
| Acidobacteria   | Acidobacteriaceae             | sf_16 | 6414  | PCE-contaminated site clone CLs73                        | 4.639 | 0.002 | 0.000 |
| Bacteroidetes   | Flavobacteriaceae             | sf_1  | 6246  | crevicular epithelial cells clone BU084                  | 4.641 | 0.005 | 0.001 |
| Firmicutes      | Unclassified                  | sf_1  | 2388  | G+C Gram-positive clone YNPRH70A                         | 4.642 | 0.001 | 0.000 |
| Proteobacteria  | Helicobacteraceae             | sf_3  | 10467 |                                                          | 4.642 | 0.003 | 0.000 |
| Verrucomicrobia | Verrucomicrobia subdivision 7 | sf_1  | 559   | anoxic marine sediment clone LD1-PA20                    | 4.644 | 0.001 | 0.000 |
| Actinobacteria  | Frankiaceae                   | sf_1  | 1286  | Frankia sp. Sn5-8                                        | 4.645 | 0.001 | 0.000 |
| Cyanobacteria   | Unclassified                  | sf_6  | 5186  | geothermal power station discharge drain clone ST01-SN2C | 4.645 | 0.002 | 0.000 |
| Proteobacteria  | Sphingomonadaceae             | sf_1  | 6690  | Porphyrobacter tepidarius str. OK5APO                    | 4.647 | 0.001 | 0.000 |
| Firmicutes      | Clostridiaceae                | sf_12 | 4627  | termite gut homogenate clone Rs-A13 bacterium            | 4.652 | 0.001 | 0.000 |
| Proteobacteria  | Unclassified                  | sf_7  | 10048 |                                                          | 4.653 | 0.002 | 0.000 |
| Proteobacteria  | Neisseriaceae                 | sf_1  | 7675  | Neisseria sp. str. CCUG 46910                            | 4.656 | 0.001 | 0.000 |
| Proteobacteria  | Comamonadaceae                | sf_1  | 8112  | Comamonas testosteroni str. SMCC B329                    | 4.657 | 0.001 | 0.000 |
| Proteobacteria  | Oxalobacteraceae              | sf_1  | 7866  | Paucimonas lemoignei str. ATCC 17989T                    | 4.658 | 0.001 | 0.000 |
| Bacteroidetes   | Flexibacteraceae              | sf_19 | 5566  | Hongiella mannitolivorans str. IMSNU 14012 JC2050        | 4.658 | 0.001 | 0.000 |
| Bacteroidetes   | Flavobacteriaceae             | sf_1  | 5971  | Cytophaga uliginosa                                      | 4.659 | 0.001 | 0.000 |
| Acidobacteria   | Unclassified                  | sf_1  | 100   | soil sample uranium clone JG36-TzT-10                    | 4.659 | 0.001 | 0.000 |
| Proteobacteria  | Enterobacteriaceae            | sf_6  | 646   | Opitutus sp. str. SA-9                                   | 4.661 | 0.001 | 0.000 |
| Planctomycetes  | Unclassified                  | sf_1  | 4897  | deep marine sediment clone MB-C2-105                     | 4.663 | 0.001 | 0.000 |
| Proteobacteria  | Nitrosomonadaceae             | sf_1  | 7789  |                                                          | 4.664 | 0.002 | 0.000 |
| Proteobacteria  | Unclassified                  | sf_2  | 6639  |                                                          | 4.664 | 0.001 | 0.000 |

|                |                         |       |       |                                                  |       |       |       |
|----------------|-------------------------|-------|-------|--------------------------------------------------|-------|-------|-------|
| Actinobacteria | Micrococcaceae          | sf_1  | 1686  | Yania halotolerans str. YIM 70085                | 4.664 | 0.001 | 0.000 |
| Bacteroidetes  | Porphyromonadaceae      | sf_1  | 5961  | chlorobenzene-degrading consortium clone IA-16   | 4.667 | 0.003 | 0.000 |
| Bacteroidetes  | Porphyromonadaceae      | sf_1  | 5295  | swine intestine clone p-987-s962-5               | 4.668 | 0.001 | 0.000 |
| Firmicutes     | Unclassified            | sf_1  | 2443  | Desulfotomaculum thermoacetoxidans str. DSM 5813 | 4.669 | 0.001 | 0.000 |
| Bacteroidetes  | Porphyromonadaceae      | sf_1  | 6012  | mouse feces clone L11-6                          | 4.670 | 0.001 | 0.000 |
| Bacteroidetes  | Bacteroidaceae          | sf_6  | 5792  | activated sludge foam clone 47                   | 4.672 | 0.001 | 0.000 |
| TM7            | Unclassified            | sf_1  | 2917  | arid soil clone C026                             | 4.673 | 0.002 | 0.000 |
| Cyanobacteria  | Chloroplasts            | sf_5  | 5183  | Pisum sativum -- chloroplast                     | 4.675 | 0.001 | 0.000 |
| Firmicutes     | Clostridiaceae          | sf_12 | 3021  | Clostridium caminithermale str. DVird3           | 4.675 | 0.001 | 0.000 |
| Firmicutes     | Lachnospiraceae         | sf_5  | 2893  | Ruminococcus obeum                               | 4.676 | 0.002 | 0.000 |
| Proteobacteria | Alcanivoraceae          | sf_1  | 8335  | Alcanivorax sp. str. K3-3 (MBIC 4323)            | 4.677 | 0.002 | 0.000 |
| Actinobacteria | Micrococcaceae          | sf_1  | 1724  | Rothia mucilaginoso str. DSM                     | 4.678 | 0.001 | 0.000 |
| Proteobacteria | Alteromonadaceae        | sf_1  | 9239  | Arctic sea ice ARK10228                          | 4.679 | 0.002 | 0.000 |
| Firmicutes     | Bacillaceae             | sf_1  | 3328  | Pseudobacillus carolinae                         | 4.680 | 0.002 | 0.000 |
| Proteobacteria | Polyangiaceae           | sf_3  | 10353 | sludge clone A9                                  | 4.680 | 0.001 | 0.000 |
| Firmicutes     | Lachnospiraceae         | sf_5  | 3042  | swine intestine clone p-2876-6C5                 | 4.681 | 0.001 | 0.000 |
| Firmicutes     | Bacillaceae             | sf_1  | 829   | Geobacillus sp. str. YMTC1049                    | 4.682 | 0.001 | 0.000 |
| Chloroflexi    | Unclassified            | sf_9  | 576   | DCP-dechlorinating consortium clone SHA-36       | 4.684 | 0.001 | 0.000 |
| Proteobacteria | Halomonadaceae          | sf_1  | 8598  | Halomonas desiderata str. FB2                    | 4.686 | 0.003 | 0.000 |
| Firmicutes     | Peptococc/Acidaminococc | sf_11 | 59    | swine intestine clone p-1941-s962-3              | 4.686 | 0.001 | 0.000 |
| Proteobacteria | Burkholderiaceae        | sf_1  | 7957  | Maconellicoccus hirsutus symbiont                | 4.687 | 0.001 | 0.000 |

|                  |                      |       |      |                                                               |       |       |       |
|------------------|----------------------|-------|------|---------------------------------------------------------------|-------|-------|-------|
| Proteobacteria   | Comamonadaceae       | sf_1  | 7987 | Acidovorax sp. str. OS-6                                      | 4.687 | 0.001 | 0.000 |
| Acidobacteria    | Unclassified         | sf_1  | 4222 | forested wetland clone FW105                                  | 4.687 | 0.002 | 0.000 |
| Deinococcus-Ther | Unclassified         | sf_1  | 563  | Vulcanithermus mediatlanticus str. TR                         | 4.687 | 0.001 | 0.000 |
| Proteobacteria   | Unclassified         | sf_9  | 9784 | Antarctic sediment clone LH5_30                               | 4.689 | 0.002 | 0.000 |
| Proteobacteria   | Thiotrichaceae       | sf_3  | 9015 | Beggiatoa alba str. B18LD; ATCC 33555                         | 4.689 | 0.001 | 0.000 |
| Nitrospira       | Nitrospiraceae       | sf_2  | 681  |                                                               | 4.693 | 0.001 | 0.000 |
| Firmicutes       | Streptococcaceae     | sf_1  | 3869 | Streptococcus equi subsp. zooepidemicus str. Tokyo1291 subsp. | 4.694 | 0.002 | 0.000 |
| Acidobacteria    | Unclassified         | sf_1  | 37   | soil clone BAC-14A1                                           | 4.695 | 0.001 | 0.000 |
| Proteobacteria   | Unclassified         | sf_3  | 8036 | Uranium mill tailings soil sample clone Sh765B-TzT-132        | 4.698 | 0.002 | 0.000 |
| Proteobacteria   | Xanthobacteraceae    | sf_1  | 6971 | Thiobacillus sp. str. 104                                     | 4.699 | 0.001 | 0.000 |
| Bacteroidetes    | Bacteroidaceae       | sf_12 | 5256 | termite gut homogenate clone Rs-D38 bacterium                 | 4.702 | 0.002 | 0.000 |
| Proteobacteria   | Syntrophobacteraceae | sf_1  | 9731 | uranium mining waste pile clone JG37-AG-90 proteobacterium    | 4.705 | 0.001 | 0.000 |
| Firmicutes       | Enterococcaceae      | sf_1  | 3288 | hyper-ammonia producing swine storage pits manure             | 4.709 | 0.002 | 0.000 |
| Proteobacteria   | Unclassified         | sf_1  | 3084 | coal effluent wetland clone RCP216                            | 4.711 | 0.002 | 0.000 |
| Bacteroidetes    | Flavobacteriaceae    | sf_1  | 6252 | Riftia pachyptila's tube clone R103-B20                       | 4.711 | 0.001 | 0.000 |
| Planctomycetes   | Pirellulae           | sf_3  | 4769 | anoxic marine sediment clone LD1-PA40                         | 4.717 | 0.001 | 0.000 |
| Proteobacteria   | Coxiellaceae         | sf_3  | 7893 | agricultural soil clone SC-I-71                               | 4.718 | 0.002 | 0.000 |
| Acidobacteria    | Unclassified         | sf_1  | 1049 | soil clone C112                                               | 4.718 | 0.001 | 0.000 |
| Synergistes      | Unclassified         | sf_3  | 117  | termite gut homogenate clone Rs-D89                           | 4.720 | 0.002 | 0.000 |
| Verrucomicrobia  | Unclassified         | sf_5  | 686  | Guaymas Basin hydrothermal sediment clone a2b018              | 4.722 | 0.001 | 0.000 |
| Firmicutes       | Erysipelotrichaceae  | sf_3  | 3965 | TCE-contaminated site clone ccsIm238                          | 4.722 | 0.001 | 0.000 |

|                   |                       |       |       |                                                             |       |       |       |
|-------------------|-----------------------|-------|-------|-------------------------------------------------------------|-------|-------|-------|
| Cyanobacteria     | Unclassified          | sf_5  | 5064  | Oscillatoria neglecta str. M-82                             | 4.724 | 0.001 | 0.000 |
| Spirochaetes      | Spirochaetaceae       | sf_1  | 6491  | termite gut homogenate clone BCf8-03                        | 4.725 | 0.001 | 0.000 |
| Actinobacteria    | Cellulomonadaceae     | sf_1  | 1748  | Beutenbergia cavernosa str. DSM 12333                       | 4.725 | 0.001 | 0.000 |
| Firmicutes        | Clostridiaceae        | sf_12 | 4502  |                                                             | 4.728 | 0.001 | 0.000 |
| Firmicutes        | Clostridiaceae        | sf_12 | 4427  | Clostridium tyrobutyricum str. NIZO 51                      | 4.732 | 0.003 | 0.000 |
| Firmicutes        | Peptostreptococcaceae | sf_5  | 58    | Peptostreptococcus sp. str. E3_32                           | 4.734 | 0.001 | 0.000 |
| Proteobacteria    | Unclassified          | sf_3  | 8339  | water 5 m downstream manure clone 35ds5                     | 4.735 | 0.002 | 0.000 |
| OP3               | Unclassified          | sf_2  | 349   | soil clone PBS-25                                           | 4.736 | 0.001 | 0.000 |
| Proteobacteria    | Unclassified          | sf_1  | 9128  | Lucina nassula gill symbiont                                | 4.738 | 0.001 | 0.000 |
| Proteobacteria    | Syntrophaceae         | sf_3  | 9665  | Syntrophus gentianae str. HQgoe1                            | 4.739 | 0.002 | 0.000 |
| WS3               | Unclassified          | sf_3  | 95    | marine sediment above hydrate ridge clone Hyd24-32          | 4.740 | 0.001 | 0.000 |
| Cyanobacteria     | Chloroplasts          | sf_5  | 4966  | Adiantum pedatum                                            | 4.745 | 0.001 | 0.000 |
| Proteobacteria    | Unclassified          | sf_1  | 6830  | coal effluent wetland clone RCP124                          | 4.748 | 0.002 | 0.000 |
| Proteobacteria    | Rickettsiaceae        | sf_1  | 6809  | Rickettsia rickettsii str. Sawtooth                         | 4.749 | 0.001 | 0.000 |
| OP9/JS1           | Unclassified          | sf_1  | 2491  | deep marine sediment clone MB-B2-103                        | 4.751 | 0.001 | 0.000 |
| Cyanobacteria     | Unclassified          | sf_9  | 5038  | Rumen isolate str. YS2                                      | 4.751 | 0.001 | 0.000 |
| Natronoanaerobium | Unclassified          | sf_1  | 3745  | Mono Lake at depth 35m station 6 July 2000 clone ML635J-45  | 4.752 | 0.001 | 0.000 |
| Proteobacteria    | Desulfobulbaceae      | sf_1  | 10332 | Psychrophilic sulfate-reducing isolate str. LSv23 bacterium | 4.752 | 0.001 | 0.000 |
| Proteobacteria    | Unclassified          | sf_3  | 8926  | inactive deep-sea hydrothermal vent chimneys clone lhcB2-13 | 4.754 | 0.002 | 0.000 |
| Actinobacteria    | Unclassified          | sf_2  | 1233  |                                                             | 4.760 | 0.001 | 0.000 |
| TM7               | Unclassified          | sf_1  | 3025  |                                                             | 4.763 | 0.001 | 0.000 |

|                  |                               |       |       |                                                                         |       |       |       |
|------------------|-------------------------------|-------|-------|-------------------------------------------------------------------------|-------|-------|-------|
| Actinobacteria   | Sporichthyaceae               | sf_1  | 1695  | lichen-dominated Antarctic cryptoendolithic community clone FBP417      | 4.763 | 0.001 | 0.000 |
| Proteobacteria   | Pseudomonadaceae              | sf_1  | 8288  |                                                                         | 4.765 | 0.001 | 0.000 |
| Proteobacteria   | Alcaligenaceae                | sf_1  | 7768  | swine intestine clone p-861-a5                                          | 4.766 | 0.001 | 0.000 |
| Chloroflexi      | Unclassified                  | sf_1  | 927   | hydrothermal vent polychaete mucous clone P. palm C 37                  | 4.768 | 0.001 | 0.000 |
| Actinobacteria   | Microthrixineae               | sf_1  | 1576  | actinobacterium clone ML817J-10                                         | 4.770 | 0.001 | 0.000 |
| Proteobacteria   | Desulfobacteraceae            | sf_5  | 9666  | marine sediment above hydrate ridge clone Hyd89-13 proteobacterium      | 4.770 | 0.001 | 0.000 |
| Gemmatimonadetes | Unclassified                  | sf_5  | 1127  | uranium mining waste pile near Johanngeorgenstadt soil clone JG37-AG-21 | 4.771 | 0.001 | 0.000 |
| Actinobacteria   | Unclassified                  | sf_3  | 2045  | hypersaline lake clone ML602J-44                                        | 4.772 | 0.001 | 0.000 |
| Bacteroidetes    | Porphyromonadaceae            | sf_1  | 5817  | termite gut homogenate clone Rs-N56 bacterium                           | 4.772 | 0.003 | 0.000 |
| Proteobacteria   | Acetobacteraceae              | sf_1  | 7600  | Acetobacter pomorum str. LTH2458                                        | 4.774 | 0.001 | 0.000 |
| Proteobacteria   | Sphingomonadaceae             | sf_1  | 6663  | Sphingopyxis flavimaris str. SW-151                                     | 4.775 | 0.001 | 0.000 |
| Proteobacteria   | Unclassified                  | sf_3  | 8646  |                                                                         | 4.776 | 0.001 | 0.000 |
| Proteobacteria   | Unclassified                  | sf_9  | 10049 | DCP-dechlorinating consortium clone SHA-72                              | 4.777 | 0.001 | 0.000 |
| Proteobacteria   | Methylococcaceae              | sf_1  | 9438  | marine sediment above hydrate ridge clone Hyd24-01 proteobacterium      | 4.778 | 0.001 | 0.000 |
| Spirochaetes     | Spirochaetaceae               | sf_1  | 6494  | termite gut homogenate clone Rs-C47 sp.                                 | 4.779 | 0.001 | 0.000 |
| Proteobacteria   | Xanthomonadaceae              | sf_3  | 9211  | penguin droppings sediments clone KD8-80                                | 4.780 | 0.001 | 0.000 |
| Proteobacteria   | Pasteurellaceae               | sf_1  | 8308  | Haemophilus actinomycetemcomitans                                       | 4.782 | 0.002 | 0.000 |
| Verrucomicrobia  | Verrucomicrobia subdivision 7 | sf_1  | 446   | anoxic marine sediment clone LD1-PA34                                   | 4.782 | 0.001 | 0.000 |
| Proteobacteria   | Unclassified                  | sf_3  | 9568  | forested wetland clone RCP2-96                                          | 4.788 | 0.001 | 0.000 |
| Bacteroidetes    | Flexibacteraceae              | sf_19 | 5667  | penguin droppings sediments clone KD6-118                               | 4.791 | 0.001 | 0.000 |
| Proteobacteria   | Unclassified                  | sf_6  | 7340  | uranium mining waste pile soil sample clone JG30-KF-AS50                | 4.791 | 0.001 | 0.000 |

|                  |                       |        |       |                                                                              |       |       |       |
|------------------|-----------------------|--------|-------|------------------------------------------------------------------------------|-------|-------|-------|
| Proteobacteria   | Thiotrichaceae        | sf_3   | 8703  | Beggiatoa sp. str. AA5A                                                      | 4.794 | 0.001 | 0.000 |
| Proteobacteria   | Pasteurellaceae       | sf_1   | 8848  | str. 86355                                                                   | 4.796 | 0.002 | 0.000 |
| Spirochaetes     | Spirochaetaceae       | sf_1   | 6565  | termite gut clone NkS-Oxy25                                                  | 4.799 | 0.001 | 0.000 |
| Unclassified     | Unclassified          | sf_156 | 4291  | Mono Lake at depth 35m station 6 July 2000 clone ML635J-21 G+C               | 4.804 | 0.002 | 0.000 |
| Proteobacteria   | Syntrophobacteraceae  | sf_1   | 9864  | uranium mining waste pile clone JG37-AG-133 proteobacterium                  | 4.806 | 0.001 | 0.000 |
| Firmicutes       | Clostridiaceae        | sf_12  | 4378  |                                                                              | 4.807 | 0.001 | 0.000 |
| Spirochaetes     | Spirochaetaceae       | sf_1   | 6502  | Treponema denticola str. ATCC35405                                           | 4.807 | 0.001 | 0.000 |
| Proteobacteria   | Caedibacteraceae      | sf_4   | 7157  | acid mine drainage clone ASL45                                               | 4.810 | 0.001 | 0.000 |
| Proteobacteria   | Pseudomonadaceae      | sf_1   | 9300  | Lyrodus pedicellatus symbiont                                                | 4.813 | 0.001 | 0.000 |
| Planctomycetes   | Pirellulae            | sf_3   | 4677  | aerobic basin clone CY0ARA032A03                                             | 4.815 | 0.001 | 0.000 |
| Proteobacteria   | Comamonadaceae        | sf_1   | 8152  | nephridia Octolasion lacteum clone OI2-2                                     | 4.827 | 0.001 | 0.000 |
| Unclassified     | Unclassified          | sf_160 | 485   | thermal spring mat clone O1aA90                                              | 4.828 | 0.001 | 0.000 |
| Lentisphaerae    | Unclassified          | sf_5   | 9704  | Cytophaga sp. str. Dex80-64                                                  | 4.829 | 0.002 | 0.000 |
| Firmicutes       | Peptostreptococcaceae | sf_5   | 2694  | oral periodontitis clone FX028                                               | 4.829 | 0.001 | 0.000 |
| Deinococcus-Ther | Unclassified          | sf_2   | 637   | hypersaline pond clone LA7-B27N                                              | 4.831 | 0.001 | 0.000 |
| Proteobacteria   | Unclassified          | sf_1   | 10259 |                                                                              | 4.833 | 0.001 | 0.000 |
| Bacteroidetes    | Flexibacteraceae      | sf_19  | 6261  | Arctic sea ice cryoconite clone ARKCRY-50                                    | 4.836 | 0.001 | 0.000 |
| Proteobacteria   | Unclassified          | sf_1   | 9959  | forested wetland clone FW110                                                 | 4.838 | 0.001 | 0.000 |
| Firmicutes       | Lactobacillaceae      | sf_1   | 3366  | Lactobacillus saerimneri str. GDA154 LMG 22087 DSM 16049 (T); CCUG 48462 (T) | 4.842 | 0.001 | 0.000 |
| Firmicutes       | Clostridiaceae        | sf_12  | 4566  | swine intestine clone p-2657-65A5                                            | 4.845 | 0.001 | 0.000 |
| Chloroflexi      | Unclassified          | sf_1   | 159   | anaerobic bioreactor clone SHD-235                                           | 4.847 | 0.001 | 0.000 |

|                |                     |        |      |                                                     |       |       |       |
|----------------|---------------------|--------|------|-----------------------------------------------------|-------|-------|-------|
| Firmicutes     | Unclassified        | sf_17  | 2432 |                                                     | 4.851 | 0.001 | 0.000 |
| Firmicutes     | Acholeplasmataceae  | sf_1   | 3945 | Ash witches'-broom phytoplasma str. AshWB           | 4.856 | 0.001 | 0.000 |
| Unclassified   | Unclassified        | sf_160 | 7444 |                                                     | 4.863 | 0.001 | 0.000 |
| Firmicutes     | Clostridiaceae      | sf_12  | 4560 | Clostridium beijerinckii str. NCIMB9362             | 4.868 | 0.001 | 0.000 |
| Proteobacteria | Unclassified        | sf_1   | 9059 | activated sludge clone SBRH10                       | 4.869 | 0.001 | 0.000 |
| Firmicutes     | Eubacteriaceae      | sf_1   | 28   | termite gut homogenate clone Rs-H81 bacterium       | 4.871 | 0.001 | 0.000 |
| Proteobacteria | Rhodocyclaceae      | sf_1   | 8052 | Dechloromonas aromatica str. RCB                    | 4.872 | 0.001 | 0.000 |
| Proteobacteria | Unclassified        | sf_3   | 468  | marine sediment clone Sva0515                       | 4.875 | 0.001 | 0.000 |
| Bacteroidetes  | Flavobacteriaceae   | sf_1   | 5997 | Flavobacterium aquatile                             | 4.879 | 0.001 | 0.000 |
| Chloroflexi    | Unclassified        | sf_1   | 2397 | deep marine sediment clone MB-C2-127                | 4.879 | 0.001 | 0.000 |
| Spirochaetes   | Spirochaetaceae     | sf_1   | 6488 | Treponema primitia str. ZAS-1                       | 4.879 | 0.001 | 0.000 |
| Proteobacteria | Legionellaceae      | sf_1   | 8836 | Legionella pneumophila str. Paris                   | 4.879 | 0.001 | 0.000 |
| Proteobacteria | Unclassified        | sf_2   | 7188 | termite gut homogenate clone Rs-B50 proteobacterium | 4.880 | 0.001 | 0.000 |
| Proteobacteria | Unclassified        | sf_4   | 9951 | forested wetland clone FW13                         | 4.881 | 0.001 | 0.000 |
| Firmicutes     | Lactobacillaceae    | sf_1   | 3767 | Lactobacillus suebicus str. CECT 5917T              | 4.882 | 0.001 | 0.000 |
| Proteobacteria | Magnetospirillaceae | sf_1   | 6922 | Dechlorospirillum sp. str. SN1                      | 4.882 | 0.001 | 0.000 |
| Proteobacteria | Methylobacteriaceae | sf_1   | 7585 | Methylobacterium thiocyanatum str. ALL/SCN-P        | 4.883 | 0.001 | 0.000 |
| Proteobacteria | Unclassified        | sf_9   | 9760 | deep marine sediment clone MB-A2-137                | 4.888 | 0.001 | 0.000 |
| Proteobacteria | Enterobacteriaceae  | sf_1   | 8747 | uranium waste soil clone JG30-KF-CM35               | 4.888 | 0.001 | 0.000 |
| OP10           | Unclassified        | sf_1   | 326  | geothermal clone ST01-SN3H                          | 4.894 | 0.001 | 0.000 |
| SPAM           | Unclassified        | sf_1   | 738  | uranium mining waste clone JG34-KF-252              | 4.894 | 0.001 | 0.000 |



|                |                         |       |       |                                                             |       |       |       |
|----------------|-------------------------|-------|-------|-------------------------------------------------------------|-------|-------|-------|
| Caldithrix     | Caldithraceae           | sf_2  | 91    | benzoate-degrading consortium clone BA059                   | 4.895 | 0.001 | 0.000 |
| Proteobacteria | Bradyrhizobiaceae       | sf_1  | 7126  | ground water Tomsk-7 clone S15A-MN96 proteobacterium        | 4.895 | 0.001 | 0.000 |
| Proteobacteria | Alcaligenaceae          | sf_1  | 7932  | Achromobacter subsp. denitrificans str. DSM 30026 (T)       | 4.896 | 0.001 | 0.000 |
| Proteobacteria | Unclassified            | sf_1  | 9678  | coal effluent wetland clone RCP185                          | 4.897 | 0.001 | 0.000 |
| Firmicutes     | Bacillaceae             | sf_1  | 234   | Bacillus vulcani str. 3S-1                                  | 4.902 | 0.000 | 0.000 |
| Firmicutes     | Unclassified            | sf_1  | 2359  | UASB granular sludge clone JP                               | 4.902 | 0.001 | 0.000 |
| Proteobacteria | Burkholderiaceae        | sf_1  | 7747  |                                                             | 4.905 | 0.000 | 0.000 |
| Lentisphaerae  | Unclassified            | sf_5  | 10027 | Cytophaga sp. str. Dex80-43                                 | 4.905 | 0.001 | 0.000 |
| Proteobacteria | Unclassified            | sf_6  | 8780  | uranium mining mill tailing clone GR-296.II.89 GR-296.II.89 | 4.911 | 0.000 | 0.000 |
| Chloroflexi    | Unclassified            | sf_9  | 72    | Charon's Cascade near Echo River October 2000 clone CCD21   | 4.914 | 0.001 | 0.000 |
| Proteobacteria | Roseococcaceae          | sf_1  | 7500  | Great Artesian Basin clone B35                              | 4.915 | 0.001 | 0.000 |
| Proteobacteria | Helicobacteraceae       | sf_3  | 10590 | termite gut homogenate clone Rs-H40 proteobacterium         | 4.919 | 0.002 | 0.000 |
| Proteobacteria | Unclassified            | sf_1  | 10384 | deep-sea hydrothermal vent clone VC1.2-cl06                 | 4.919 | 0.000 | 0.000 |
| Firmicutes     | Paenibacillaceae        | sf_1  | 3299  | Brevibacillus borstelensis str. LMG 15536                   | 4.925 | 0.001 | 0.000 |
| Firmicutes     | Unclassified            | sf_1  | 3481  |                                                             | 4.926 | 0.002 | 0.000 |
| Proteobacteria | Alteromonadaceae        | sf_1  | 9562  | Alteromonadaceae clone PH-B55N                              | 4.927 | 0.001 | 0.000 |
| Firmicutes     | Unclassified            | sf_3  | 4280  |                                                             | 4.938 | 0.000 | 0.000 |
| Firmicutes     | Peptococc/Acidaminococc | sf_11 | 300   | benzene-contaminated groundwater clone ZZ12C8               | 4.939 | 0.001 | 0.000 |
| Firmicutes     | Peptococc/Acidaminococc | sf_11 | 771   | Dialister pneumosintes str. ATCC 33048                      | 4.939 | 0.001 | 0.000 |
| Firmicutes     | Streptococcaceae        | sf_1  | 3251  | Streptococcus cristatus str. ATCC 51100                     | 4.943 | 0.002 | 0.000 |
| Firmicutes     | Lachnospiraceae         | sf_5  | 2943  | human thigh wound isolate str. MDA2477                      | 4.944 | 0.001 | 0.000 |

|                |                         |       |       |                                                         |       |       |       |
|----------------|-------------------------|-------|-------|---------------------------------------------------------|-------|-------|-------|
| Bacteroidetes  | Rikenellaceae           | sf_5  | 5892  | anoxic bulk soil flooded rice microcosm clone BSV73     | 4.945 | 0.001 | 0.000 |
| Firmicutes     | Lachnospiraceae         | sf_5  | 3171  | Lachnospira pectinoschiza                               | 4.946 | 0.001 | 0.000 |
| Spirochaetes   | Spirochaetaceae         | sf_1  | 6460  | termite gut homogenate clone Rs-B69 sp.                 | 4.947 | 0.001 | 0.000 |
| Firmicutes     | Unclassified            | sf_4  | 4526  | TCE-contaminated site clone ccsIm210                    | 4.948 | 0.001 | 0.000 |
| Firmicutes     | Carnobacteriaceae       | sf_1  | 3536  |                                                         | 4.949 | 0.001 | 0.000 |
| Firmicutes     | Peptostreptococcaceae   | sf_5  | 2993  | oral clone P2PB_46 P3                                   | 4.950 | 0.001 | 0.000 |
| Bacteroidetes  | Flexibacteraceae        | sf_19 | 5563  | Cytophaga sp. I-545                                     | 4.953 | 0.001 | 0.000 |
| Actinobacteria | Coriobacteriaceae       | sf_1  | 1459  | termite gut homogenate clone Rs-J59 bacterium           | 4.955 | 0.000 | 0.000 |
| Lentisphaerae  | Unclassified            | sf_5  | 10330 | Mono lake clone ML635J-58                               | 4.960 | 0.001 | 0.000 |
| Firmicutes     | Lachnospiraceae         | sf_5  | 2991  | rumen clone 3C3d-8                                      | 4.960 | 0.001 | 0.000 |
| Proteobacteria | Desulfovibrionaceae     | sf_1  | 10248 | Desulfovibrio giganteus str. DSM 4370                   | 4.964 | 0.001 | 0.000 |
| Proteobacteria | Polyangiaceae           | sf_3  | 9755  | bacterioplankton clone ZA3704c                          | 4.964 | 0.001 | 0.000 |
| Proteobacteria | Unclassified            | sf_1  | 7199  | uranium mill tailings clone Gitt-KF-194                 | 4.966 | 0.000 | 0.000 |
| Firmicutes     | Clostridiaceae          | sf_12 | 4278  | granular sludge clone R1p16                             | 4.969 | 0.000 | 0.000 |
| Bacteroidetes  | Rikenellaceae           | sf_5  | 5889  | termite gut homogenate clone Rs-F73 bacterium           | 4.970 | 0.002 | 0.000 |
| Proteobacteria | Desulfobacteraceae      | sf_5  | 10136 | Guaymas Basin hydrothermal vent sediments clone B01R011 | 4.974 | 0.001 | 0.000 |
| Proteobacteria | Burkholderiaceae        | sf_1  | 7782  | Burkholderia hospita str. LMG 20598T                    | 4.975 | 0.001 | 0.000 |
| Proteobacteria | Nitrosomonadaceae       | sf_1  | 8145  | Nitrosomonas eutropha str. Nm57                         | 4.976 | 0.000 | 0.000 |
| Firmicutes     | Peptococc/Acidaminococc | sf_11 | 31    | Dehalobacter restrictus str. TEA                        | 4.976 | 0.001 | 0.000 |
| Planctomycetes | Pirellulae              | sf_3  | 4670  |                                                         | 4.985 | 0.000 | 0.000 |
| Cyanobacteria  | Chloroplasts            | sf_5  | 4976  | Calypogeia muelleriana                                  | 4.985 | 0.000 | 0.000 |

|                 |                     |       |       |                                                           |       |       |       |
|-----------------|---------------------|-------|-------|-----------------------------------------------------------|-------|-------|-------|
| Actinobacteria  | Kineosporiaceae     | sf_1  | 1087  | Kineosporia aurantiaca str. JCM3230                       | 4.988 | 0.000 | 0.000 |
| Proteobacteria  | Unclassified        | sf_1  | 7067  | Blastochloris sulfoviridis str. GN1                       | 4.991 | 0.000 | 0.000 |
| Proteobacteria  | Desulfobacteraceae  | sf_5  | 9800  | forested wetland clone FW57                               | 4.993 | 0.001 | 0.000 |
| Proteobacteria  | Unclassified        | sf_6  | 6918  | soil near uranium mill tailings clone KCM-C-45            | 4.996 | 0.002 | 0.000 |
| Firmicutes      | Lachnospiraceae     | sf_5  | 2965  | oral endodontic infection clone MCE9_173                  | 4.998 | 0.000 | 0.000 |
| Firmicutes      | Erysipelotrichaceae | sf_3  | 3981  | phototrophic sludge clone PSB-M-3                         | 4.998 | 0.001 | 0.000 |
| Proteobacteria  | Rhodocyclaceae      | sf_1  | 8131  |                                                           | 4.999 | 0.000 | 0.000 |
| Cyanobacteria   | Unclassified        | sf_8  | 5206  |                                                           | 5.000 | 0.002 | 0.000 |
| TM6             | Unclassified        | sf_1  | 9803  | forest soil clone S1204                                   | 5.005 | 0.001 | 0.000 |
| Proteobacteria  | Campylobacteraceae  | sf_3  | 10523 | Riftia pachyptila's tube clone R103-B70                   | 5.006 | 0.001 | 0.000 |
| Firmicutes      | Lactobacillaceae    | sf_1  | 3547  | Lactobacillus frumenti str. TMW 1.666                     | 5.009 | 0.000 | 0.000 |
| Firmicutes      | Syntrophomonadaceae | sf_5  | 2483  | trichloroethene-contaminated site clone FTLM142 bacterium | 5.009 | 0.001 | 0.000 |
| Verrucomicrobia | Verrucomicrobiaceae | sf_7  | 29    | Fucophilus fucoidanalyticus str. SI-1234                  | 5.011 | 0.001 | 0.000 |
| Proteobacteria  | Polyangiaceae       | sf_3  | 9900  | bioreactor clone mle1-27                                  | 5.012 | 0.000 | 0.000 |
| Actinobacteria  | Microbacteriaceae   | sf_1  | 1135  | Rhodoglobus vestalii str. LV3                             | 5.012 | 0.001 | 0.000 |
| Nitrospira      | Nitrospiraceae      | sf_1  | 984   | uranium mining waste pile clone JG37-AG-131 sp.           | 5.026 | 0.000 | 0.000 |
| Firmicutes      | Clostridiaceae      | sf_12 | 2764  |                                                           | 5.029 | 0.000 | 0.000 |
| Firmicutes      | Bacillaceae         | sf_1  | 3909  | Bacillus subtilis subsp. Marburg str. 168                 | 5.034 | 0.001 | 0.000 |
| Firmicutes      | Lachnospiraceae     | sf_5  | 3109  | Catonella morbi str. ATCC 51271                           | 5.035 | 0.002 | 0.000 |
| Bacteroidetes   | Prevotellaceae      | sf_1  | 5426  | tongue dorsa clone DO014                                  | 5.035 | 0.001 | 0.000 |
| Bacteroidetes   | Prevotellaceae      | sf_1  | 6152  | rumen clone RF37                                          | 5.035 | 0.000 | 0.000 |

|                 |                         |        |       |                                                              |       |       |       |
|-----------------|-------------------------|--------|-------|--------------------------------------------------------------|-------|-------|-------|
| Bacteroidetes   | Prevotellaceae          | sf_1   | 5249  | Prevotella denticola str. ATCC 35308                         | 5.037 | 0.001 | 0.000 |
| Acidobacteria   | Acidobacteriaceae       | sf_14  | 541   | uranium mill tailings soil sample clone GuBH2-AG-47 sp.      | 5.037 | 0.001 | 0.000 |
| Proteobacteria  | Unclassified            | sf_6   | 6665  | hydrocarbon-degrading consortium clone 4-Org2-22             | 5.038 | 0.000 | 0.000 |
| Bacteroidetes   | Prevotellaceae          | sf_1   | 5946  | tongue dorsa clone DO027                                     | 5.040 | 0.002 | 0.000 |
| Firmicutes      | Peptococc/Acidaminococc | sf_11  | 181   | Allisonella histaminiformans str. MR2                        | 5.044 | 0.000 | 0.000 |
| Actinobacteria  | Unclassified            | sf_3   | 1577  | termite gut homogenate clone Rs-N91 bacterium                | 5.051 | 0.000 | 0.000 |
| Actinobacteria  | Cellulomonadaceae       | sf_1   | 1923  | Actinobacteria str. VeCb6                                    | 5.052 | 0.000 | 0.000 |
| Spirochaetes    | Spirochaetaceae         | sf_1   | 6458  | termite gut clone NkS34                                      | 5.057 | 0.000 | 0.000 |
| Unclassified    | Unclassified            | sf_160 | 10012 |                                                              | 5.057 | 0.001 | 0.000 |
| Firmicutes      | Peptostreptococcaceae   | sf_5   | 2796  | human subgingival plaque clone BB142                         | 5.058 | 0.000 | 0.000 |
| Verrucomicrobia | Verrucomicrobiaceae     | sf_6   | 871   |                                                              | 5.062 | 0.000 | 0.000 |
| Proteobacteria  | Neisseriaceae           | sf_1   | 8143  | subgingival dental plaque clone AK105                        | 5.066 | 0.000 | 0.000 |
| Proteobacteria  | Rhodocyclaceae          | sf_1   | 7824  | termite gut homogenate clone Rs-B77 proteobacterium          | 5.066 | 0.001 | 0.000 |
| Bacteroidetes   | Flavobacteriaceae       | sf_1   | 5942  |                                                              | 5.066 | 0.001 | 0.000 |
| Proteobacteria  | Unclassified            | sf_6   | 7575  |                                                              | 5.067 | 0.001 | 0.000 |
| Proteobacteria  | Unclassified            | sf_1   | 10622 |                                                              | 5.068 | 0.002 | 0.000 |
| Firmicutes      | Peptostreptococcaceae   | sf_5   | 393   | Anaerococcus vaginalis str. CCUG 31349                       | 5.069 | 0.001 | 0.000 |
| Firmicutes      | Clostridiaceae          | sf_12  | 4296  | Clostridiaceae str. A4d                                      | 5.070 | 0.000 | 0.000 |
| Proteobacteria  | Enterobacteriaceae      | sf_1   | 8477  | marine sediment clone Limfjorden L8                          | 5.073 | 0.001 | 0.000 |
| Proteobacteria  | Unclassified            | sf_6   | 7312  |                                                              | 5.077 | 0.000 | 0.000 |
| Bacteroidetes   | Unclassified            | sf_15  | 5481  | marine sediment above hydrate ridge clone Hyd89-72 bacterium | 5.078 | 0.001 | 0.000 |

|                   |                       |        |       |                                                            |       |       |       |
|-------------------|-----------------------|--------|-------|------------------------------------------------------------|-------|-------|-------|
| Proteobacteria    | Desulfobulbaceae      | sf_1   | 9739  | gas hydrate clone Hyd89-51                                 | 5.083 | 0.001 | 0.000 |
| Bacteroidetes     | Prevotellaceae        | sf_1   | 6239  | tongue dorsa clone DO033                                   | 5.091 | 0.002 | 0.000 |
| Unclassified      | Unclassified          | sf_160 | 6360  |                                                            | 5.093 | 0.000 | 0.000 |
| Firmicutes        | Paenibacillaceae      | sf_1   | 3630  |                                                            | 5.096 | 0.000 | 0.000 |
| Firmicutes        | Sporolactobacillaceae | sf_1   | 3365  | Bacillus sp. clone ML615J-19                               | 5.098 | 0.000 | 0.000 |
| Bacteroidetes     | Prevotellaceae        | sf_1   | 5331  | tongue dorsa clone DO022                                   | 5.099 | 0.001 | 0.000 |
| Cyanobacteria     | Unclassified          | sf_1   | 5219  | Synechococcus sp. str. UH7                                 | 5.100 | 0.000 | 0.000 |
| Natronoanaerobium | Unclassified          | sf_1   | 2437  | Mono Lake at depth 23m station 6 July 2000 clone ML623J-19 | 5.101 | 0.000 | 0.000 |
| Firmicutes        | Clostridiaceae        | sf_21  | 4471  | termite gut clone Rs-058                                   | 5.104 | 0.000 | 0.000 |
| Acidobacteria     | Unclassified          | sf_1   | 588   | TCB-transforming consortium clone SJA-36                   | 5.107 | 0.000 | 0.000 |
| Firmicutes        | Unclassified          | sf_3   | 2373  |                                                            | 5.107 | 0.001 | 0.000 |
| Planctomycetes    | Planctomycetaceae     | sf_3   | 4855  | aerobic basin clone CY0ARA026D10                           | 5.109 | 0.000 | 0.000 |
| Bacteroidetes     | Sphingobacteriaceae   | sf_1   | 5492  | Sphingobacterium sp. str. HC-6155                          | 5.109 | 0.001 | 0.000 |
| Proteobacteria    | Helicobacteraceae     | sf_3   | 10612 | hydrothermal vent polychaete mucous clone P. palm C/A 64   | 5.113 | 0.001 | 0.000 |
| Verrucomicrobia   | Unclassified          | sf_4   | 169   | anoxic marine sediment clone LD1-PA26                      | 5.114 | 0.001 | 0.000 |
| Firmicutes        | Peptostreptococcaceae | sf_5   | 2714  | termite gut homogenate clone Rs-N27 bacterium              | 5.118 | 0.000 | 0.000 |
| Firmicutes        | Streptococcaceae      | sf_1   | 3685  | Streptococcus gordonii str. ATCC 10558                     | 5.124 | 0.001 | 0.000 |
| Firmicutes        | Leuconostocaceae      | sf_1   | 3573  | Leuconostoc ficulneum str. FS-1                            | 5.125 | 0.000 | 0.000 |
| Firmicutes        | Lactobacillaceae      | sf_1   | 3600  | Lactobacillus crispatus str. NCTC 4                        | 5.126 | 0.001 | 0.000 |
| Acidobacteria     | Acidobacteriaceae     | sf_14  | 6412  | acid mine drainage clone TRB82                             | 5.126 | 0.000 | 0.000 |
| Firmicutes        | Lactobacillaceae      | sf_1   | 3634  | Lactobacillus letivazi str. JCL3994                        | 5.127 | 0.001 | 0.000 |

|                  |                    |       |       |                                                                |       |       |       |
|------------------|--------------------|-------|-------|----------------------------------------------------------------|-------|-------|-------|
| Proteobacteria   | Polyangiaceae      | sf_3  | 10298 | marine tidal mat clone BTM36                                   | 5.131 | 0.001 | 0.000 |
| Firmicutes       | Lachnospiraceae    | sf_5  | 2693  | ruminantium str. GA195                                         | 5.135 | 0.001 | 0.000 |
| Firmicutes       | Bacillaceae        | sf_1  | 3383  |                                                                | 5.136 | 0.000 | 0.000 |
| Firmicutes       | Lachnospiraceae    | sf_5  | 3152  | tongue dorsa clone DO016                                       | 5.138 | 0.000 | 0.000 |
| Proteobacteria   | Bradyrhizobiaceae  | sf_1  | 6887  | Bradyrhizobium str. YB2                                        | 5.143 | 0.000 | 0.000 |
| Firmicutes       | Clostridiaceae     | sf_12 | 4477  | termite gut homogenate clone Rs-N85 bacterium                  | 5.148 | 0.001 | 0.000 |
| Chlorobi         | Chlorobiaceae      | sf_1  | 995   | Chlorobium limicola str. M1                                    | 5.149 | 0.001 | 0.000 |
| Firmicutes       | Unclassified       | sf_8  | 4536  | Mono Lake at depth 35m station 6 July 2000 clone ML635J-14 G+C | 5.149 | 0.001 | 0.000 |
| Firmicutes       | Unclassified       | sf_4  | 2398  | deep marine sediment clone MB-C2-106                           | 5.150 | 0.000 | 0.000 |
| OP10             | Unclassified       | sf_5  | 9782  | Rocky Mountain alpine soil clone S1a-1H                        | 5.150 | 0.000 | 0.000 |
| Acidobacteria    | Unclassified       | sf_1  | 897   | Mammoth cave clone CCM8b                                       | 5.150 | 0.000 | 0.000 |
| Spirochaetes     | Spirochaetaceae    | sf_1  | 6579  | termite gut clone NkS83                                        | 5.151 | 0.000 | 0.000 |
| Proteobacteria   | Bradyrhizobiaceae  | sf_1  | 6636  | Bradyrhizobium elkanii str. USDA 76                            | 5.151 | 0.001 | 0.000 |
| Proteobacteria   | Bradyrhizobiaceae  | sf_1  | 7522  | Bradyrhizobium sp. str. KKI14                                  | 5.151 | 0.001 | 0.000 |
| Planctomycetes   | Planctomycetaceae  | sf_3  | 4948  | anoxic basin clone CY0ARA027D01                                | 5.152 | 0.000 | 0.000 |
| Firmicutes       | Acholeplasmataceae | sf_1  | 4046  | Pigeon pea witches'-broom mycoplasma-like organism             | 5.152 | 0.001 | 0.000 |
| Bacteroidetes    | Flavobacteriaceae  | sf_1  | 5955  | Flavobacterium sp. str. V4.MS.29 = MM_2747                     | 5.156 | 0.001 | 0.000 |
| Spirochaetes     | Spirochaetaceae    | sf_1  | 6476  | termite gut clone NkS50                                        | 5.157 | 0.000 | 0.000 |
| Deinococcus-Ther | Unclassified       | sf_1  | 178   | Thermus sp. str. C4                                            | 5.157 | 0.000 | 0.000 |
| Proteobacteria   | Unclassified       | sf_1  | 10407 | hydrothermal sediment clone AF420342                           | 5.162 | 0.000 | 0.000 |
| Bacteroidetes    | Unclassified       | sf_4  | 5785  | Mono Lake at depth 35 m station 6 July 2000 clone ML635J-56    | 5.164 | 0.001 | 0.000 |

|                 |                        |       |       |                                                            |       |       |       |
|-----------------|------------------------|-------|-------|------------------------------------------------------------|-------|-------|-------|
| Proteobacteria  | Desulfovibrionaceae    | sf_1  | 10212 |                                                            | 5.164 | 0.000 | 0.000 |
| Spirochaetes    | Spirochaetaceae        | sf_1  | 6506  | termite gut homogenate clone Rs-J58 sp.                    | 5.167 | 0.001 | 0.000 |
| Firmicutes      | Acholeplasmataceae     | sf_1  | 4044  |                                                            | 5.168 | 0.001 | 0.000 |
| Proteobacteria  | Campylobacteraceae     | sf_3  | 10563 | Campylobacter sp. str. DSM 806                             | 5.169 | 0.001 | 0.000 |
| Spirochaetes    | Spirochaetaceae        | sf_1  | 6523  | termite gut homogenate clone Rs-J64 sp.                    | 5.173 | 0.000 | 0.000 |
| Actinobacteria  | Micrococcaceae         | sf_1  | 1610  | Arthrobacter sp str. AC-51                                 | 5.174 | 0.001 | 0.000 |
| Spirochaetes    | Spirochaetaceae        | sf_1  | 6526  | Treponema sp. str. 7CPL208                                 | 5.176 | 0.001 | 0.000 |
| Proteobacteria  | Pseudomonadaceae       | sf_1  | 8850  | Agrobacterium agile str. IAM12615                          | 5.177 | 0.001 | 0.000 |
| Verrucomicrobia | Verrucomicrobiaceae    | sf_6  | 613   | hydrothermal vent polychaete mucous clone P. palm C 85     | 5.181 | 0.001 | 0.000 |
| Firmicutes      | Aerococcaceae          | sf_1  | 3519  | Granulicatella elegans str. DSM 11693; B1333               | 5.184 | 0.000 | 0.000 |
| Cyanobacteria   | Chloroplasts           | sf_5  | 5192  | Cycas revoluta                                             | 5.186 | 0.000 | 0.000 |
| Proteobacteria  | Polyangiaceae          | sf_3  | 10309 | Nannocystis exedens str. Na e571                           | 5.186 | 0.000 | 0.000 |
| Firmicutes      | Lachnospiraceae        | sf_5  | 4571  | Faecalibacterium prausnitzii str. ATCC 27766               | 5.187 | 0.000 | 0.000 |
| Firmicutes      | Unclassified           | sf_1  | 2490  | Desulfotomaculum solfataricum str. V21                     | 5.188 | 0.000 | 0.000 |
| Actinobacteria  | Kineosporiaceae        | sf_1  | 1961  | Kineococcus aurantiacus str. IFO 15268                     | 5.188 | 0.000 | 0.000 |
| Bacteroidetes   | Unclassified           | sf_15 | 5578  | ground water Tomsk-7 clone S15A-MN91                       | 5.194 | 0.000 | 0.000 |
| Proteobacteria  | Ectothiorhodospiraceae | sf_1  | 9450  | Halorhodospira neutrophila str. SG 3304                    | 5.194 | 0.001 | 0.000 |
| Cyanobacteria   | Unclassified           | sf_1  | 5034  | Spirulina subsalsa str. FACHB351                           | 5.196 | 0.000 | 0.000 |
| Proteobacteria  | Unclassified           | sf_1  | 9418  | uranium mining waste pile clone JG37-AG-14 proteobacterium | 5.197 | 0.001 | 0.000 |
| Proteobacteria  | Thiotrichaceae         | sf_3  | 8559  | Thioploca ingrica                                          | 5.202 | 0.000 | 0.000 |
| Proteobacteria  | Unclassified           | sf_1  | 6945  | Rhizobiales str. A48                                       | 5.203 | 0.001 | 0.000 |

|                |                       |       |       |                                                                    |       |       |       |
|----------------|-----------------------|-------|-------|--------------------------------------------------------------------|-------|-------|-------|
| Cyanobacteria  | Unclassified          | sf_5  | 5188  | Acaryochloris marina str. MBIC11017                                | 5.210 | 0.001 | 0.000 |
| Firmicutes     | Clostridiaceae        | sf_12 | 4418  | termite gut homogenate clone Rs-H18 bacterium                      | 5.210 | 0.000 | 0.000 |
| Chloroflexi    | Unclassified          | sf_1  | 2438  | deep marine sediment clone MB-A2-110                               | 5.211 | 0.001 | 0.000 |
| Proteobacteria | Unclassified          | sf_6  | 7647  |                                                                    | 5.212 | 0.000 | 0.000 |
| Spirochaetes   | Spirochaetaceae       | sf_1  | 6507  | termite gut clone NkS-Ste2                                         | 5.214 | 0.000 | 0.000 |
| SR1            | Unclassified          | sf_1  | 2900  |                                                                    | 5.218 | 0.001 | 0.000 |
| Proteobacteria | Campylobacteraceae    | sf_3  | 10538 | Arcobacter cryaerophilus                                           | 5.221 | 0.002 | 0.000 |
| Proteobacteria | Unclassified          | sf_9  | 9993  |                                                                    | 5.224 | 0.001 | 0.000 |
| Proteobacteria | Bradyrhizobiaceae     | sf_1  | 6867  | heavy metal-contaminated soil clone a13131                         | 5.227 | 0.000 | 0.000 |
| Firmicutes     | Peptostreptococcaceae | sf_5  | 3080  | termite gut homogenate clone Rs-F43 bacterium                      | 5.229 | 0.000 | 0.000 |
| Firmicutes     | Clostridiaceae        | sf_12 | 4359  | termite gut homogenate clone Rs-C69 bacterium                      | 5.232 | 0.001 | 0.000 |
| Spirochaetes   | Spirochaetaceae       | sf_3  | 6558  | Spirochaeta culicis str. BR91                                      | 5.244 | 0.000 | 0.000 |
| Proteobacteria | Polyangiaceae         | sf_4  | 9733  | bacterioplankton clone ZA3735c                                     | 5.248 | 0.001 | 0.000 |
| Proteobacteria | Unclassified          | sf_1  | 10489 | S17sBac16 complete clone                                           | 5.252 | 0.001 | 0.000 |
| Proteobacteria | Unclassified          | sf_3  | 9473  | Arctic pack ice; clone ARKDMS-58                                   | 5.255 | 0.000 | 0.000 |
| Firmicutes     | Clostridiaceae        | sf_12 | 4607  | Clostridium novyi str. NCTC538                                     | 5.256 | 0.000 | 0.000 |
| Proteobacteria | Caulobacteraceae      | sf_1  | 6968  | Brevundimonas diminuta str. IAM 12691T                             | 5.256 | 0.000 | 0.000 |
| Proteobacteria | Pseudomonadaceae      | sf_1  | 8813  | Lyrodus pedicellatus symbiont                                      | 5.259 | 0.001 | 0.000 |
| Firmicutes     | Streptococcaceae      | sf_1  | 3637  | str. 37236                                                         | 5.260 | 0.000 | 0.000 |
| BRC1           | Unclassified          | sf_1  | 5143  | soil clone PBS-II-1                                                | 5.260 | 0.001 | 0.000 |
| Actinobacteria | Kineosporiaceae       | sf_1  | 1598  | lichen-dominated Antarctic cryptoendolithic community clone FBP402 | 5.263 | 0.000 | 0.000 |



|                |                         |        |       |                                                       |       |       |       |
|----------------|-------------------------|--------|-------|-------------------------------------------------------|-------|-------|-------|
| Proteobacteria | Unclassified            | sf_1   | 10076 | Great Artesian Basin clone G13                        | 5.269 | 0.001 | 0.000 |
| Firmicutes     | Peptococc/Acidaminococc | sf_11  | 126   | oral periodontitis clone FY011                        | 5.275 | 0.000 | 0.000 |
| Firmicutes     | Clostridiaceae          | sf_12  | 4610  | Clostridium putrefaciens str. DSM 1291                | 5.284 | 0.000 | 0.000 |
| Firmicutes     | Streptococcaceae        | sf_1   | 3907  | aortic heart valve patient with endocarditis clone v6 | 5.286 | 0.000 | 0.000 |
| Actinobacteria | Acidimicrobiaceae       | sf_1   | 1749  | forest soil clone DUNssu275 (-3A) (OTU#188)           | 5.286 | 0.000 | 0.000 |
| Proteobacteria | Helicobacteraceae       | sf_3   | 10438 | hydrocarbon seep clone GCA014                         | 5.292 | 0.001 | 0.000 |
| Proteobacteria | Unclassified            | sf_1   | 7156  | termite gut homogenate clone Rs-M62 proteobacterium   | 5.300 | 0.000 | 0.000 |
| Firmicutes     | Lachnospiraceae         | sf_5   | 3075  | Roseburia intestinalis str. L1-82                     | 5.301 | 0.000 | 0.000 |
| Fusobacteria   | Fusobacteriaceae        | sf_3   | 1034  | Ilyobacter tartaricus str. DSM 2382 T                 | 5.302 | 0.000 | 0.000 |
| Firmicutes     | Clostridiaceae          | sf_12  | 4265  | termite gut homogenate clone Rs-N70 bacterium         | 5.306 | 0.001 | 0.000 |
| Firmicutes     | Peptostreptococcaceae   | sf_5   | 2729  | DCP-dechlorinating consortium clone SHA-58            | 5.307 | 0.000 | 0.000 |
| Nitrospira     | Nitrospiraceae          | sf_2   | 697   | forested wetland clone FW118                          | 5.309 | 0.000 | 0.000 |
| Firmicutes     | Lachnospiraceae         | sf_5   | 2801  | Butyrivibrio fibrisolvens                             | 5.310 | 0.000 | 0.000 |
| Actinobacteria | Dermabacteraceae        | sf_1   | 2053  | Brachybacterium nesterenkovi str. DSM 9573            | 5.311 | 0.000 | 0.000 |
| Unclassified   | Unclassified            | sf_160 | 4410  |                                                       | 5.313 | 0.000 | 0.000 |
| Bacteroidetes  | Bacteroidaceae          | sf_12  | 5320  | Bacteroides distasonis                                | 5.313 | 0.001 | 0.000 |
| Proteobacteria | Desulfobacteraceae      | sf_5   | 10319 | sulfate-reducing habitat clone SLM-CP-116             | 5.313 | 0.001 | 0.000 |
| Actinobacteria | Unclassified            | sf_3   | 1687  | Jonesia quinghaiensis str. DSM 15701                  | 5.315 | 0.000 | 0.000 |
| Firmicutes     | Lachnospiraceae         | sf_5   | 3236  | Firmicutes sp. oral strain str. FTB41                 | 5.323 | 0.000 | 0.000 |
| Proteobacteria | Helicobacteraceae       | sf_3   | 10448 | Helicobacter felis str. Dog-1                         | 5.326 | 0.001 | 0.000 |
| Planctomycetes | Planctomycetaceae       | sf_3   | 4831  | Planctomyces brasiliensis                             | 5.326 | 0.001 | 0.000 |

|                |                         |       |       |                                                              |       |       |       |
|----------------|-------------------------|-------|-------|--------------------------------------------------------------|-------|-------|-------|
| Actinobacteria | Coriobacteriaceae       | sf_1  | 2021  | termite gut homogenate clone Rs-D41 bacterium                | 5.327 | 0.001 | 0.000 |
| Proteobacteria | Helicobacteraceae       | sf_3  | 10518 | Helicobacter pylori str. ATCC 49396T                         | 5.329 | 0.001 | 0.000 |
| Firmicutes     | Peptococc/Acidaminococc | sf_11 | 1036  | Great Artesian Basin clone G07                               | 5.330 | 0.000 | 0.000 |
| Proteobacteria | Unclassified            | sf_1  | 10497 | UASB reactor granular sludge clone PD-UASB-2 proteobacterium | 5.330 | 0.001 | 0.000 |
| Proteobacteria | Unclassified            | sf_1  | 7382  | marine clone Arctic95C-5                                     | 5.333 | 0.000 | 0.000 |
| Firmicutes     | Clostridiaceae          | sf_12 | 4266  | termite gut homogenate clone Rs-M86 bacterium                | 5.334 | 0.000 | 0.000 |
| Proteobacteria | Methylococcaceae        | sf_1  | 8243  | isolate str. IR                                              | 5.336 | 0.001 | 0.000 |
| Proteobacteria | Campylobacteraceae      | sf_3  | 10464 | Campylobacter sp. str. NO2B                                  | 5.337 | 0.000 | 0.000 |
| Actinobacteria | Microbacteriaceae       | sf_1  | 1197  | Arctic sea ice ARK10173                                      | 5.338 | 0.000 | 0.000 |
| Proteobacteria | Unclassified            | sf_4  | 9741  | uranium mining waste pile clone JG37-AG-30 proteobacterium   | 5.338 | 0.000 | 0.000 |
| OP10           | Unclassified            | sf_1  | 514   | sludge clone SBRA136                                         | 5.340 | 0.000 | 0.000 |
| Firmicutes     | Clostridiaceae          | sf_12 | 3077  | Clostridium glycolicum str. DSM 1288                         | 5.341 | 0.000 | 0.000 |
| Chloroflexi    | Unclassified            | sf_9  | 205   | uranium mining waste pile clone JG34-KF-221                  | 5.342 | 0.000 | 0.000 |
| Cyanobacteria  | Chloroplasts            | sf_5  | 5147  | Emiliana huxleyi str. Plymouth Marine Laborator PML 92       | 5.344 | 0.001 | 0.000 |
| Bacteroidetes  | Bacteroidaceae          | sf_12 | 5950  |                                                              | 5.346 | 0.000 | 0.000 |
| TM7            | Unclassified            | sf_1  | 3679  |                                                              | 5.347 | 0.001 | 0.000 |
| Proteobacteria | Helicobacteraceae       | sf_3  | 10432 | Riftia pachyptila's tube clone R76-B51                       | 5.352 | 0.001 | 0.000 |
| Firmicutes     | Clostridiaceae          | sf_12 | 4622  | termite gut clone Rs-L36                                     | 5.358 | 0.000 | 0.000 |
| Firmicutes     | Lachnospiraceae         | sf_5  | 2931  | termite gut homogenate clone Rs-G77 bacterium                | 5.359 | 0.000 | 0.000 |
| Firmicutes     | Lachnospiraceae         | sf_5  | 3087  | Butyrivibrio hungatei str. Su6                               | 5.362 | 0.000 | 0.000 |
| Cyanobacteria  | Unclassified            | sf_9  | 5164  | termite gut homogenate clone Rs-H34                          | 5.363 | 0.000 | 0.000 |

|                |                      |       |       |                                                                      |       |       |       |
|----------------|----------------------|-------|-------|----------------------------------------------------------------------|-------|-------|-------|
| Proteobacteria | Unclassified         | sf_1  | 10475 | hydrothermal sediment clone AF420359                                 | 5.364 | 0.000 | 0.000 |
| Firmicutes     | Bacillaceae          | sf_1  | 571   | Bacillus caldotenax str. DSM 406                                     | 5.367 | 0.000 | 0.000 |
| Firmicutes     | Alicyclobacillaceae  | sf_1  | 3368  | geothermal site isolate str. G1                                      | 5.368 | 0.000 | 0.000 |
| Firmicutes     | Bacillaceae          | sf_1  | 3460  | Geobacillus jurassicus str. DS1                                      | 5.369 | 0.000 | 0.000 |
| Proteobacteria | Desulfobacteraceae   | sf_5  | 10031 | Antarctic sediment clone SB1_49                                      | 5.372 | 0.001 | 0.000 |
| Proteobacteria | Desulfuromonaceae    | sf_1  | 10020 | uranium mill tailings soil sample clone GuBH2-AG-114 proteobacterium | 5.372 | 0.000 | 0.000 |
| Proteobacteria | Neisseriaceae        | sf_1  | 7945  | Aquaspirillum serpens str. IAM 13944                                 | 5.373 | 0.000 | 0.000 |
| Firmicutes     | Lachnospiraceae      | sf_5  | 4525  | termite gut homogenate clone Rs-Q18 bacterium                        | 5.373 | 0.000 | 0.000 |
| Proteobacteria | Unclassified         | sf_1  | 10530 | hydrothermal vent clone CH5_6_BAC_16SrRNA_9N_EPR                     | 5.373 | 0.001 | 0.000 |
| Firmicutes     | Unclassified         | sf_1  | 2351  | Desulfotomaculum thermobenzoicum str. DSM 6193                       | 5.377 | 0.000 | 0.000 |
| Proteobacteria | Campylobacteraceae   | sf_3  | 10549 | Campylobacter upsaliensis str. LMG 8850                              | 5.377 | 0.001 | 0.000 |
| Proteobacteria | Helicobacteraceae    | sf_3  | 10444 | Helicobacter suncus str. Kaz-2                                       | 5.384 | 0.001 | 0.000 |
| Firmicutes     | Acholeplasmataceae   | sf_1  | 3961  | Clover yellow edge mycoplasma-like organism                          | 5.385 | 0.001 | 0.000 |
| Firmicutes     | Lachnospiraceae      | sf_5  | 2698  | termite gut homogenate clone Rs-B88 bacterium                        | 5.386 | 0.000 | 0.000 |
| Firmicutes     | Bacillaceae          | sf_1  | 3848  | Bacillus sp. str. TUT1007                                            | 5.387 | 0.001 | 0.000 |
| Firmicutes     | Clostridiaceae       | sf_12 | 4321  | termite gut homogenate clone Rs-C76 bacterium                        | 5.387 | 0.000 | 0.000 |
| Proteobacteria | Helicobacteraceae    | sf_3  | 10411 | termite gut homogenate clone Rs-P71 proteobacterium                  | 5.391 | 0.001 | 0.000 |
| Actinobacteria | Unclassified         | sf_3  | 1405  | Arthrobacter ureafaciens str. DSM 20126                              | 5.391 | 0.000 | 0.000 |
| Proteobacteria | Unclassified         | sf_20 | 2520  |                                                                      | 5.396 | 0.000 | 0.000 |
| Proteobacteria | Unclassified         | sf_1  | 7400  | sphagnum peat bog clone K-5b5                                        | 5.399 | 0.000 | 0.000 |
| Proteobacteria | Syntrophobacteraceae | sf_1  | 10221 | granular sludge clone R3p4                                           | 5.403 | 0.000 | 0.000 |

|                |                    |       |       |                                                        |       |       |       |
|----------------|--------------------|-------|-------|--------------------------------------------------------|-------|-------|-------|
| TM7            | Unclassified       | sf_1  | 5061  |                                                        | 5.404 | 0.000 | 0.000 |
| Proteobacteria | Sphingomonadaceae  | sf_1  | 7535  | Sphingomonas paucimobilis str. GIFU2395                | 5.405 | 0.000 | 0.000 |
| Bacteroidetes  | Flavobacteriaceae  | sf_1  | 6274  |                                                        | 5.406 | 0.000 | 0.000 |
| Proteobacteria | Unclassified       | sf_3  | 7765  |                                                        | 5.408 | 0.001 | 0.000 |
| Actinobacteria | Microbacteriaceae  | sf_1  | 1186  | Cryocola antiquus str. VKM 103PF                       | 5.408 | 0.000 | 0.000 |
| Firmicutes     | Clostridiaceae     | sf_12 | 4575  | Clostridium subterminale str. NCIMB 10746              | 5.414 | 0.000 | 0.000 |
| Firmicutes     | Unclassified       | sf_1  | 522   | UASB granular sludge clone UT-1                        | 5.414 | 0.001 | 0.000 |
| Firmicutes     | Bacillaceae        | sf_1  | 462   | Geobacillus thermodenitrificans str. DSM 466           | 5.417 | 0.000 | 0.000 |
| Bacteroidetes  | Prevotellaceae     | sf_1  | 5720  | Prevotella sp. str. E9_34                              | 5.421 | 0.001 | 0.000 |
| Actinobacteria | Micrococcaceae     | sf_1  | 1213  | Kocuria roseus                                         | 5.423 | 0.000 | 0.000 |
| Chlorobi       | Chlorobiaceae      | sf_1  | 859   | Chlorobium phaeovibrioides str. 2631                   | 5.428 | 0.000 | 0.000 |
| Spirochaetes   | Spirochaetaceae    | sf_1  | 6508  | termite hindgut clone mpsp2                            | 5.430 | 0.000 | 0.000 |
| Chloroflexi    | Unclassified       | sf_9  | 375   | forest soil clone C043                                 | 5.436 | 0.000 | 0.000 |
| Proteobacteria | Desulfobacteraceae | sf_5  | 9940  | Antarctic sediment clone SB2_56                        | 5.438 | 0.000 | 0.000 |
| Proteobacteria | Sphingomonadaceae  | sf_1  | 7537  | Antarctic clone FBP255 proteobacterium                 | 5.440 | 0.000 | 0.000 |
| Proteobacteria | Unclassified       | sf_1  | 10427 | hydrothermal vent clone CH3_17_BAC_16SrRNA_9N_EPR      | 5.443 | 0.001 | 0.000 |
| Firmicutes     | Streptococcaceae   | sf_1  | 3543  |                                                        | 5.443 | 0.000 | 0.000 |
| Actinobacteria | Micrococcaceae     | sf_1  | 1494  | Arthrobacter agilis str. DSM 20550                     | 5.451 | 0.000 | 0.000 |
| Proteobacteria | Unclassified       | sf_1  | 10480 | hydrothermal vent polychaete mucous clone P. palm C 84 | 5.452 | 0.001 | 0.000 |
| Actinobacteria | Corynebacteriaceae | sf_1  | 1374  |                                                        | 5.455 | 0.000 | 0.000 |
| Bacteroidetes  | Flavobacteriaceae  | sf_1  | 5969  | Capnocytophaga ochracea str. ATCC 27872 T              | 5.457 | 0.001 | 0.000 |

|                |                         |       |       |                                                                 |       |       |       |
|----------------|-------------------------|-------|-------|-----------------------------------------------------------------|-------|-------|-------|
| Proteobacteria | Bradyrhizobiaceae       | sf_1  | 7390  | Afipia genosp. 10 str. G8996                                    | 5.460 | 0.000 | 0.000 |
| Proteobacteria | Helicobacteraceae       | sf_23 | 10443 | Helicobacter pylori str. 85D08                                  | 5.460 | 0.001 | 0.000 |
| Proteobacteria | Helicobacteraceae       | sf_3  | 10576 | Helicobacter sp. 'liver 3' str. liver 3                         | 5.460 | 0.001 | 0.000 |
| Firmicutes     | Unclassified            | sf_17 | 2324  |                                                                 | 5.465 | 0.000 | 0.000 |
| Firmicutes     | Peptostreptococcaceae   | sf_5  | 2722  | termite gut homogenate clone Rs-E61 bacterium                   | 5.466 | 0.000 | 0.000 |
| Acidobacteria  | Unclassified            | sf_1  | 6426  | Great Artesian Basin clone B11                                  | 5.467 | 0.000 | 0.000 |
| Firmicutes     | Peptococc/Acidaminococc | sf_11 | 534   | chlorobenzene-degrading consortium clone IIA-26                 | 5.468 | 0.001 | 0.000 |
| Firmicutes     | Clostridiaceae          | sf_12 | 4555  | Clostridium tyrobutyricum                                       | 5.471 | 0.000 | 0.000 |
| Proteobacteria | Bradyrhizobiaceae       | sf_1  | 6768  | Rhodopseudomonas palustris str. GH                              | 5.473 | 0.000 | 0.000 |
| Firmicutes     | Peptococc/Acidaminococc | sf_11 | 39    | forested wetland clone RCP2-71                                  | 5.474 | 0.001 | 0.000 |
| Firmicutes     | Clostridiaceae          | sf_12 | 4598  | Clostridium sardiniense str. DSM 600                            | 5.477 | 0.000 | 0.000 |
| Cyanobacteria  | Chloroplasts            | sf_5  | 5039  | Cape Hatteras picoplankton clone OM270                          | 5.479 | 0.000 | 0.000 |
| Proteobacteria | Polyangiaceae           | sf_3  | 9671  | hydrothermal sediment clone AF420357                            | 5.481 | 0.000 | 0.000 |
| Spirochaetes   | Spirochaetaceae         | sf_1  | 6554  | termite gut homogenate clone Rs-A43 sp.                         | 5.481 | 0.000 | 0.000 |
| Firmicutes     | Lachnospiraceae         | sf_5  | 4613  | rumen clone 3C0d-3                                              | 5.484 | 0.000 | 0.000 |
| Firmicutes     | Peptostreptococcaceae   | sf_5  | 2797  | hyper-ammonia producing swine storage pits manure               | 5.486 | 0.000 | 0.000 |
| Proteobacteria | Sphingomonadaceae       | sf_1  | 7548  | Afipia genosp. 13 str. G8991                                    | 5.487 | 0.000 | 0.000 |
| Bacteroidetes  | Flavobacteriaceae       | sf_1  | 5317  | Tenacibaculum maritimum str. IFO 15946                          | 5.488 | 0.000 | 0.000 |
| Chloroflexi    | Unclassified            | sf_1  | 2339  | uranium mill tailings soil sample clone Sh765B-TzT-20 bacterium | 5.489 | 0.000 | 0.000 |
| Firmicutes     | Lachnospiraceae         | sf_5  | 3218  | termite gut homogenate clone Rs-N53                             | 5.492 | 0.001 | 0.000 |
| Spirochaetes   | Leptospiraceae          | sf_3  | 6496  | Leptospira interrogans serovar Copenhageni str. Fiocruz L1-130  | 5.493 | 0.001 | 0.000 |

|                |                         |       |       |                                                             |       |       |       |
|----------------|-------------------------|-------|-------|-------------------------------------------------------------|-------|-------|-------|
| Proteobacteria | Comamonadaceae          | sf_1  | 7856  | Variovorax paradoxus                                        | 5.495 | 0.000 | 0.000 |
| Proteobacteria | Desulfobacteraceae      | sf_5  | 10267 | marine sediment clone Hyd89-61 proteobacterium              | 5.496 | 0.000 | 0.000 |
| Proteobacteria | Helicobacteraceae       | sf_3  | 10572 | Helicobacter sp                                             | 5.499 | 0.001 | 0.000 |
| Proteobacteria | Syntrophobacteraceae    | sf_1  | 10013 | hydrothermal sediment clone AF420341                        | 5.499 | 0.000 | 0.000 |
| Proteobacteria | Unclassified            | sf_1  | 9945  | acid mine drainage clone BA18                               | 5.502 | 0.001 | 0.000 |
| Proteobacteria | Desulfobacteraceae      | sf_5  | 10046 | Desulfobacterium cetonicum str. DSM 7267 oil recovery water | 5.503 | 0.000 | 0.000 |
| Bacteroidetes  | Flavobacteriaceae       | sf_1  | 5915  | ground water Tomsk-7 clone S15A-MN27 bacterium              | 5.503 | 0.000 | 0.000 |
| Proteobacteria | Unclassified            | sf_1  | 10405 | hydrothermal sediment clone AF420346                        | 5.504 | 0.001 | 0.000 |
| Proteobacteria | Helicobacteraceae       | sf_3  | 10385 |                                                             | 5.509 | 0.001 | 0.000 |
| Proteobacteria | Helicobacteraceae       | sf_3  | 10451 | Helicobacter heilmannii str. C4S                            | 5.509 | 0.001 | 0.000 |
| DSS1           | Unclassified            | sf_2  | 38    | DCP-dechlorinating consortium clone SHA-109                 | 5.510 | 0.000 | 0.000 |
| Chloroflexi    | Unclassified            | sf_2  | 2532  | trichloroethene-contaminated site clone FTL276 bacterium    | 5.511 | 0.000 | 0.000 |
| Firmicutes     | Peptococc/Acidaminococc | sf_11 | 242   | Desulfosporosinus orientis str. DSMZ 7493                   | 5.511 | 0.001 | 0.000 |
| Firmicutes     | Lachnospiraceae         | sf_5  | 4623  | human colonic clone HuCA1                                   | 5.512 | 0.000 | 0.000 |
| Spirochaetes   | Spirochaetaceae         | sf_1  | 6532  | termite gut clone NkS39                                     | 5.513 | 0.000 | 0.000 |
| Proteobacteria | Rhodocyclaceae          | sf_1  | 8127  | Zoogloea resiniphila str. PIV-3A2y                          | 5.514 | 0.001 | 0.000 |
| Proteobacteria | Campylobacteraceae      | sf_3  | 10447 | Sulfurospirillum deleyianum str. Spirillum 5175             | 5.518 | 0.001 | 0.000 |
| Proteobacteria | Sphingomonadaceae       | sf_1  | 7075  | Novosphingobium sp. str. K16                                | 5.523 | 0.000 | 0.000 |
| Bacteroidetes  | Crenotrichaceae         | sf_11 | 5619  | anaerobic VC-degrading enrichment clone VC10 bacterium      | 5.528 | 0.000 | 0.000 |
| BRC1           | Unclassified            | sf_2  | 118   | penguin droppings sediments clone KD1-1                     | 5.528 | 0.000 | 0.000 |
| Proteobacteria | Thiotrichaceae          | sf_3  | 8741  | marine sediment clone Limfjorden L10                        | 5.530 | 0.000 | 0.000 |

|                |                         |       |       |                                                          |       |       |       |
|----------------|-------------------------|-------|-------|----------------------------------------------------------|-------|-------|-------|
| Bacteroidetes  | Flavobacteriaceae       | sf_1  | 5906  | Capnocytophaga sputigena str. ATCC 33612                 | 5.534 | 0.001 | 0.000 |
| Proteobacteria | Helicobacteraceae       | sf_3  | 10534 | Helicobacter pylori                                      | 5.536 | 0.001 | 0.000 |
| Proteobacteria | Unclassified            | sf_1  | 7060  |                                                          | 5.539 | 0.000 | 0.000 |
| Firmicutes     | Lachnospiraceae         | sf_5  | 2994  | termite gut clone Rs-L15                                 | 5.540 | 0.001 | 0.000 |
| Firmicutes     | Unclassified            | sf_17 | 3476  |                                                          | 5.546 | 0.000 | 0.000 |
| Spirochaetes   | Spirochaetaceae         | sf_1  | 6489  | Mixotricha paradoxa clone mp1                            | 5.552 | 0.000 | 0.000 |
| Firmicutes     | Peptococc/Acidaminococc | sf_11 | 304   | Selenomonas ruminantium str.JCM6582                      | 5.553 | 0.000 | 0.000 |
| Bacteroidetes  | Unclassified            | sf_15 | 5784  | fruiting body Pleurotus eryngii clone PE01               | 5.556 | 0.001 | 0.000 |
| Bacteroidetes  | Prevotellaceae          | sf_1  | 6259  |                                                          | 5.556 | 0.000 | 0.000 |
| Fusobacteria   | Fusobacteriaceae        | sf_3  | 644   | Ilyobacter polytropus str. DSM 2926 T                    | 5.568 | 0.000 | 0.000 |
| Proteobacteria | Enterobacteriaceae      | sf_1  | 8403  | Selenate-reducing isolate str. KE4OH1                    | 5.569 | 0.000 | 0.000 |
| Firmicutes     | Aerococcaceae           | sf_1  | 3840  | Trichococcus pasteurii str. KoTa2                        | 5.571 | 0.001 | 0.000 |
| Fusobacteria   | Fusobacteriaceae        | sf_1  | 488   | Fusobacterium nucleatum subsp. vincentii str. ATCC 49256 | 5.575 | 0.001 | 0.000 |
| Firmicutes     | Lachnospiraceae         | sf_5  | 2756  | Roseburia faecalis str. M6/1                             | 5.580 | 0.000 | 0.000 |
| Firmicutes     | Bacillaceae             | sf_1  | 3845  | hot synthetic compost clone pPD15                        | 5.584 | 0.000 | 0.000 |
| Actinobacteria | Coriobacteriaceae       | sf_1  | 1926  | Collinsella aerofaciens str. JCM7791                     | 5.587 | 0.000 | 0.000 |
| Spirochaetes   | Spirochaetaceae         | sf_1  | 6490  | termite gut homogenate clone BCf4-14                     | 5.594 | 0.000 | 0.000 |
| Firmicutes     | Lachnospiraceae         | sf_5  | 4434  | termite gut homogenate clone Rs-K11 bacterium            | 5.596 | 0.000 | 0.000 |
| Chloroflexi    | Unclassified            | sf_1  | 583   | anaerobic bioreactor clone SHD-238                       | 5.600 | 0.000 | 0.000 |
| Actinobacteria | Micrococcaceae          | sf_1  | 1593  | Arthrobacter globiformis                                 | 5.604 | 0.000 | 0.000 |
| Firmicutes     | Unclassified            | sf_1  | 3289  | Isobaculum melis CCUG 37660T                             | 5.605 | 0.000 | 0.000 |

|               |                         |       |      |                                                                                 |       |       |       |
|---------------|-------------------------|-------|------|---------------------------------------------------------------------------------|-------|-------|-------|
| Firmicutes    | Unclassified            | sf_17 | 926  |                                                                                 | 5.606 | 0.000 | 0.000 |
| Chloroflexi   | Unclassified            | sf_7  | 757  | DCP-dechlorinating consortium clone SHA-8                                       | 5.606 | 0.000 | 0.000 |
| OP9/JS1       | Unclassified            | sf_1  | 2489 | Guaymas Basin hydrothermal vent sediments clone B01R005                         | 5.611 | 0.000 | 0.000 |
| Spirochaetes  | Spirochaetaceae         | sf_1  | 6557 | spirochete clone ML320J-13                                                      | 5.612 | 0.001 | 0.000 |
| Firmicutes    | Lachnospiraceae         | sf_5  | 3017 | termite gut homogenate clone Rs-D48 bacterium                                   | 5.613 | 0.000 | 0.000 |
| Firmicutes    | Lactobacillaceae        | sf_1  | 3418 | Lactobacillus subsp. aviarius                                                   | 5.618 | 0.001 | 0.000 |
| Chlorobi      | Unclassified            | sf_9  | 6146 | sludge clone A12b                                                               | 5.626 | 0.000 | 0.000 |
| Firmicutes    | Lactobacillaceae        | sf_1  | 3566 | Lactobacillus pontis str. LTH 2587                                              | 5.627 | 0.001 | 0.000 |
| Firmicutes    | Lachnospiraceae         | sf_5  | 4511 | ckncm314-B7-17 clone                                                            | 5.628 | 0.000 | 0.000 |
| Firmicutes    | Clostridiaceae          | sf_12 | 4275 | Clostridium botulinum str. type G                                               | 5.629 | 0.000 | 0.000 |
| Firmicutes    | Clostridiaceae          | sf_12 | 4554 | termite gut clone Rs-068                                                        | 5.630 | 0.000 | 0.000 |
| Firmicutes    | Lactobacillaceae        | sf_1  | 3521 | Pediococcus inopinatus str. DSM 20285                                           | 5.631 | 0.000 | 0.000 |
| Firmicutes    | Peptococc/Acidaminococc | sf_11 | 428  | chlorobenzene-degrading consortium clone IIIA-1                                 | 5.638 | 0.000 | 0.000 |
| Firmicutes    | Leuconostocaceae        | sf_1  | 3497 | Weissella koreensis S-5673                                                      | 5.639 | 0.000 | 0.000 |
| Firmicutes    | Peptococc/Acidaminococc | sf_11 | 761  | Anaeroglobus geminatus str. AIP313.00; CIP 106856; CCUG 44773                   | 5.641 | 0.001 | 0.000 |
| Firmicutes    | Acholeplasmataceae      | sf_1  | 3975 | Black raspberry witches'-broom phytoplasma str. BRWB witches'-broom             | 5.643 | 0.001 | 0.000 |
| Firmicutes    | Clostridiaceae          | sf_12 | 4272 | termite gut homogenate clone Rs-M34 bacterium                                   | 5.647 | 0.001 | 0.000 |
| Bacteroidetes | Flavobacteriaceae       | sf_1  | 5367 | patient's bronchoalveolar lavage isolate str. MDA2507 sp.                       | 5.650 | 0.000 | 0.000 |
| Cyanobacteria | Unclassified            | sf_1  | 5190 | Plectonema sp. str. F3                                                          | 5.653 | 0.001 | 0.000 |
| Spirochaetes  | Spirochaetaceae         | sf_1  | 6571 | Mixotricha paradoxa is flagellate hindgut Mastotermes darwiniensis clone mp4 of | 5.653 | 0.000 | 0.000 |
| Cyanobacteria | Unclassified            | sf_5  | 4998 |                                                                                 | 5.666 | 0.000 | 0.000 |



|                |                         |        |       |                                                            |       |       |       |
|----------------|-------------------------|--------|-------|------------------------------------------------------------|-------|-------|-------|
| Firmicutes     | Bacillaceae             | sf_1   | 3900  | Bacillus licheniformis str. DSM 13                         | 5.667 | 0.000 | 0.000 |
| Cyanobacteria  | Unclassified            | sf_1   | 4978  | LPP-group isolate str. MBIC10087                           | 5.668 | 0.000 | 0.000 |
| Firmicutes     | Mycoplasmataceae        | sf_1   | 3929  | Mycoplasma gypsibengalensis str. Gb-V33                    | 5.683 | 0.000 | 0.000 |
| Firmicutes     | Clostridiaceae          | sf_12  | 4589  | Clostridium butyricum str. ATCC43755                       | 5.685 | 0.000 | 0.000 |
| Firmicutes     | Peptococc/Acidaminococc | sf_11  | 562   | oral endodontic infection clone MCE10_265                  | 5.687 | 0.000 | 0.000 |
| Proteobacteria | Sphingomonadaceae       | sf_1   | 7036  | Lutibacterium anuloderans str. LC8                         | 5.687 | 0.000 | 0.000 |
| Actinobacteria | Micrococcaceae          | sf_1   | 2020  | Rothia dentocariosa str. ChDC B200                         | 5.690 | 0.001 | 0.000 |
| Proteobacteria | Unclassified            | sf_4   | 10024 | hydrothermal sediment clone AF420338                       | 5.697 | 0.000 | 0.000 |
| Proteobacteria | Campylobacteraceae      | sf_3   | 10456 | Campylobacter showae                                       | 5.698 | 0.001 | 0.000 |
| Proteobacteria | Helicobacteraceae       | sf_3   | 10442 | Helicobacter cetorum str. MIT 99-5656                      | 5.701 | 0.001 | 0.000 |
| Proteobacteria | Unclassified            | sf_1   | 8957  | marine clone Arctic97C-5                                   | 5.701 | 0.000 | 0.000 |
| Spirochaetes   | Spirochaetaceae         | sf_1   | 6568  | Spirochaeta sp                                             | 5.706 | 0.000 | 0.000 |
| Firmicutes     | Clostridiaceae          | sf_12  | 4524  | termite gut clone Rs-093                                   | 5.711 | 0.000 | 0.000 |
| Spirochaetes   | Spirochaetaceae         | sf_1   | 6562  | forested wetland clone RCP1-96                             | 5.718 | 0.000 | 0.000 |
| Firmicutes     | Lachnospiraceae         | sf_5   | 2668  | termite gut homogenate clone Rs-G40 bacterium              | 5.721 | 0.001 | 0.000 |
| Firmicutes     | Clostridiaceae          | sf_12  | 4369  | termite gut homogenate clone Rs-N73 bacterium              | 5.724 | 0.000 | 0.000 |
| Bacteroidetes  | Unclassified            | sf_15  | 5353  | trichloroethene-contaminated site clone FTLpost3 bacterium | 5.724 | 0.001 | 0.000 |
| Firmicutes     | Clostridiaceae          | sf_12  | 4614  | Clostridium sp. str. JC3                                   | 5.727 | 0.000 | 0.000 |
| Firmicutes     | Lachnospiraceae         | sf_5   | 4315  | termite gut homogenate clone Rs-N94 bacterium              | 5.730 | 0.000 | 0.000 |
| Unclassified   | Unclassified            | sf_106 | 243   | hot spring clone OPB25                                     | 5.730 | 0.000 | 0.000 |
| Chloroflexi    | Unclassified            | sf_9   | 2539  | penguin droppings sediments clone KD4-96                   | 5.735 | 0.000 | 0.000 |

|                |                      |       |       |                                                             |       |       |       |
|----------------|----------------------|-------|-------|-------------------------------------------------------------|-------|-------|-------|
| Chloroflexi    | Unclassified         | sf_12 | 2523  | sponge clone TK10                                           | 5.737 | 0.000 | 0.000 |
| Firmicutes     | Clostridiaceae       | sf_12 | 4229  |                                                             | 5.738 | 0.000 | 0.000 |
| Firmicutes     | Aerococcaceae        | sf_1  | 3326  | Nostocoida limicola l str. Ben206                           | 5.743 | 0.001 | 0.000 |
| Firmicutes     | Clostridiaceae       | sf_12 | 4339  | Clostridium chauvoei str. ATCC 10092T                       | 5.745 | 0.000 | 0.000 |
| Proteobacteria | Sphingomonadaceae    | sf_15 | 7035  | Sphingomonas asaccharolytica str. IFO 10564-T               | 5.748 | 0.000 | 0.000 |
| Bacteroidetes  | Flavobacteriaceae    | sf_1  | 5473  |                                                             | 5.753 | 0.000 | 0.000 |
| Proteobacteria | Desulfobacteraceae   | sf_5  | 9875  | hydrothermal sediment clone AF420354                        | 5.755 | 0.000 | 0.000 |
| Proteobacteria | Unclassified         | sf_1  | 8037  | Chitinimonas taiwanensis str. cf                            | 5.757 | 0.000 | 0.000 |
| Firmicutes     | Lachnospiraceae      | sf_5  | 3111  | rumen clone 6C3d-11                                         | 5.763 | 0.000 | 0.000 |
| Firmicutes     | Clostridiaceae       | sf_12 | 4507  | termite gut homogenate clone Rs-N21 bacterium               | 5.765 | 0.000 | 0.000 |
| Proteobacteria | Syntrophobacteraceae | sf_1  | 9661  | DCP-dechlorinating consortium clone SHD-1                   | 5.774 | 0.000 | 0.000 |
| Proteobacteria | Helicobacteraceae    | sf_3  | 10454 | Helicobacter pullorum str. NCTC 12826                       | 5.776 | 0.000 | 0.000 |
| Firmicutes     | Lachnospiraceae      | sf_5  | 4567  | human colonic clone HuCB5                                   | 5.778 | 0.000 | 0.000 |
| Proteobacteria | Campylobacteraceae   | sf_3  | 10540 | Campylobacter showae str. LMG 12636                         | 5.786 | 0.001 | 0.000 |
| Firmicutes     | Unclassified         | sf_1  | 2541  | UASB granular sludge clone UT-2                             | 5.790 | 0.000 | 0.000 |
| Spirochaetes   | Spirochaetaceae      | sf_1  | 6529  | termite gut homogenate clone BCf10-21                       | 5.791 | 0.000 | 0.000 |
| Proteobacteria | Helicobacteraceae    | sf_3  | 10430 | Helicobacter heilmannii str. MM2                            | 5.798 | 0.001 | 0.000 |
| Firmicutes     | Bacillaceae          | sf_1  | 385   | Geobacillus stearothermophilus str. T10                     | 5.799 | 0.000 | 0.000 |
| Proteobacteria | Bdellovibrionaceae   | sf_1  | 10010 | uranium mining waste pile clone JG37-AG-139 proteobacterium | 5.811 | 0.000 | 0.000 |
| Proteobacteria | Unclassified         | sf_1  | 6653  | Kaistobacter koreensis str. PB229                           | 5.812 | 0.000 | 0.000 |
| Proteobacteria | Campylobacteraceae   | sf_3  | 10484 | Campylobacter helveticus                                    | 5.819 | 0.000 | 0.000 |

|                |                    |        |       |                                                                    |       |       |       |
|----------------|--------------------|--------|-------|--------------------------------------------------------------------|-------|-------|-------|
| Firmicutes     | Lachnospiraceae    | sf_5   | 4212  | termite gut clone Rs-061                                           | 5.820 | 0.000 | 0.000 |
| Proteobacteria | Unclassified       | sf_3   | 8114  |                                                                    | 5.827 | 0.000 | 0.000 |
| Proteobacteria | Helicobacteraceae  | sf_3   | 10520 | Helicobacter sp. blood isolate 964                                 | 5.833 | 0.001 | 0.000 |
| Proteobacteria | Desulfobacteraceae | sf_5   | 9818  | temperate estuarine mud clone KM62                                 | 5.833 | 0.000 | 0.000 |
| Actinobacteria | Micrococcaceae     | sf_1   | 1966  | TCE-contaminated site clone ccspost2208                            | 5.835 | 0.000 | 0.000 |
| Proteobacteria | Geobacteraceae     | sf_1   | 9956  | forested wetland clone FW140                                       | 5.836 | 0.000 | 0.000 |
| Bacteroidetes  | Flavobacteriaceae  | sf_1   | 5267  | bacterioplankton clone AEGEAN_179                                  | 5.843 | 0.000 | 0.000 |
| Proteobacteria | Sphingomonadaceae  | sf_1   | 7100  | Novosphingobium capsulatum str. GIFU11526                          | 5.845 | 0.000 | 0.000 |
| Firmicutes     | Clostridiaceae     | sf_12  | 4550  | swine intestine clone p-320-a3                                     | 5.845 | 0.000 | 0.000 |
| Firmicutes     | Lachnospiraceae    | sf_5   | 4335  | termite gut homogenate clone Rs-N86 bacterium                      | 5.852 | 0.000 | 0.000 |
| Bacteroidetes  | Flexibacteraceae   | sf_19  | 5994  | Hymenobacter sp. str. NS/50                                        | 5.861 | 0.000 | 0.000 |
| Proteobacteria | Helicobacteraceae  | sf_3   | 10436 | Helicobacter aurati str. MIT 97-5075c                              | 5.863 | 0.001 | 0.000 |
| Firmicutes     | Clostridiaceae     | sf_12  | 2786  | Clostridium glycolicum str. CIN5                                   | 5.868 | 0.000 | 0.000 |
| Firmicutes     | Clostridiaceae     | sf_12  | 4177  | Clostridium subterminale DSM 2636                                  | 5.871 | 0.000 | 0.000 |
| Firmicutes     | Acholeplasmataceae | sf_1   | 4045  | Chinaberry yellows phytoplasma                                     | 5.876 | 0.000 | 0.000 |
| Proteobacteria | Rhodocyclaceae     | sf_1   | 7907  | Thaueria aromatica str. LG356                                      | 5.880 | 0.000 | 0.000 |
| Actinobacteria | Micrococcaceae     | sf_1   | 1557  | Arthrobacter oxydans str. DSM 20119                                | 5.887 | 0.000 | 0.000 |
| Firmicutes     | Bacillaceae        | sf_1   | 3345  | Bacillus pumilus str. S9                                           | 5.890 | 0.000 | 0.000 |
| Cyanobacteria  | Unclassified       | sf_1   | 5210  | lichen-dominated Antarctic cryptoendolithic community clone FBP403 | 5.891 | 0.000 | 0.000 |
| Unclassified   | Unclassified       | sf_160 | 651   |                                                                    | 5.897 | 0.000 | 0.000 |
| Proteobacteria | Unclassified       | sf_1   | 8035  |                                                                    | 5.898 | 0.000 | 0.000 |

|                |                         |       |       |                                                                          |       |       |       |
|----------------|-------------------------|-------|-------|--------------------------------------------------------------------------|-------|-------|-------|
| Proteobacteria | Campylobacteraceae      | sf_3  | 10446 |                                                                          | 5.899 | 0.000 | 0.000 |
| Bacteroidetes  | Flavobacteriaceae       | sf_1  | 5521  | Flavobacteriaceae str. SW269                                             | 5.913 | 0.000 | 0.000 |
| Cyanobacteria  | Chloroplasts            | sf_5  | 5060  | Skeletonema pseudocostatum str. CSIRO CS-76                              | 5.915 | 0.000 | 0.000 |
| OP9/JS1        | Unclassified            | sf_1  | 969   | DCP-dechlorinating consortium clone SHA-1                                | 5.917 | 0.000 | 0.000 |
| Spirochaetes   | Spirochaetaceae         | sf_1  | 6583  | termite gut homogenate clone Rs-J42 sp.                                  | 5.931 | 0.000 | 0.000 |
| Acidobacteria  | Acidobacteriaceae       | sf_14 | 6350  | soil isolate Ellin337                                                    | 5.935 | 0.000 | 0.000 |
| Acidobacteria  | Acidobacteriaceae       | sf_14 | 6421  | PCB-polluted soil clone WD217                                            | 5.938 | 0.000 | 0.000 |
| Proteobacteria | Nitrospinaceae          | sf_2  | 594   | uranium mining mill tailing clone GR-296.II.52 GR-296.I.52               | 5.947 | 0.000 | 0.000 |
| Proteobacteria | Desulfobacteraceae      | sf_5  | 9939  | marine methane seep clone 1427                                           | 5.956 | 0.000 | 0.000 |
| Firmicutes     | Peptococc/Acidaminococc | sf_11 | 710   | Centipeda periodontii str. HB-2                                          | 5.973 | 0.000 | 0.000 |
| Cyanobacteria  | Unclassified            | sf_1  | 5049  | Oscillatoria spongelliae str. 520bg                                      | 5.973 | 0.000 | 0.000 |
| Proteobacteria | Unclassified            | sf_1  | 7123  | uranium mining waste pile near Johanngeorgenstadt soil clone JG37-AG-102 | 5.988 | 0.000 | 0.000 |
| Proteobacteria | Sphingomonadaceae       | sf_1  | 7016  | Sphingomonas sp. str. SAFR-027                                           | 5.989 | 0.000 | 0.000 |
| Firmicutes     | Peptococc/Acidaminococc | sf_11 | 709   | Selenomonas ruminantium str.S20                                          | 6.014 | 0.000 | 0.000 |
| Proteobacteria | Unclassified            | sf_9  | 9798  | uranium mill tailings soil sample clone GuBH2-AD/TzT-67 proteobacterium  | 6.017 | 0.000 | 0.000 |
| Bacteroidetes  | Flavobacteriaceae       | sf_1  | 5914  | Psychroserpens burtonensis str. S2-64                                    | 6.023 | 0.000 | 0.000 |
| Proteobacteria | Alcaligenaceae          | sf_1  | 8062  | Brackiella oedipodis str. LMG 1945 R8846                                 | 6.025 | 0.000 | 0.000 |
| Fusobacteria   | Fusobacteriaceae        | sf_3  | 721   | human mouth clone P2PB_51                                                | 6.030 | 0.000 | 0.000 |
| Proteobacteria | Unclassified            | sf_4  | 8169  | forested wetland clone RCP2-54                                           | 6.033 | 0.000 | 0.000 |
| Firmicutes     | Lachnospiraceae         | sf_5  | 4533  | termite gut homogenate clone Rs-N06 bacterium                            | 6.035 | 0.000 | 0.000 |
| Synergistes    | Unclassified            | sf_3  | 353   | UASB reactor granular sludge clone PD-UASB-13 G+C                        | 6.037 | 0.000 | 0.000 |

|                |                      |       |       |                                                                       |       |       |       |
|----------------|----------------------|-------|-------|-----------------------------------------------------------------------|-------|-------|-------|
| Firmicutes     | Clostridiaceae       | sf_12 | 4156  | MCB-contaminated groundwater-treating reactor clone RA9C1             | 6.045 | 0.000 | 0.000 |
| Cyanobacteria  | Unclassified         | sf_5  | 5027  |                                                                       | 6.046 | 0.000 | 0.000 |
| Proteobacteria | Unclassified         | sf_1  | 10084 | acid mine drainage clone AS6                                          | 6.051 | 0.000 | 0.000 |
| Firmicutes     | Unclassified         | sf_7  | 4216  |                                                                       | 6.051 | 0.000 | 0.000 |
| Proteobacteria | Helicobacteraceae    | sf_3  | 10428 | Flexispira rappini FH 9702248                                         | 6.052 | 0.001 | 0.000 |
| Proteobacteria | Syntrophobacteraceae | sf_1  | 10021 | uranium mill tailings soil sample clone Sh765B-TzT-29 proteobacterium | 6.057 | 0.000 | 0.000 |
| Firmicutes     | Clostridiaceae       | sf_12 | 4415  | termite gut homogenate clone Rs-K32 bacterium                         | 6.083 | 0.000 | 0.000 |
| Firmicutes     | Lachnospiraceae      | sf_5  | 2681  | termite gut homogenate clone Rs-K41 bacterium                         | 6.084 | 0.000 | 0.000 |
| Firmicutes     | Halobacillaceae      | sf_1  | 3769  | Gracilibacillus sp. str. YIM-kkny13                                   | 6.105 | 0.000 | 0.000 |
| Firmicutes     | Staphylococcaceae    | sf_1  | 3524  | Gemella haemolysans                                                   | 6.109 | 0.000 | 0.000 |
| Proteobacteria | Helicobacteraceae    | sf_3  | 10462 | Helicobacter rodentium str. MIT 96-1312                               | 6.109 | 0.000 | 0.000 |
| Firmicutes     | Acholeplasmataceae   | sf_1  | 3976  |                                                                       | 6.117 | 0.000 | 0.000 |
| Fusobacteria   | Fusobacteriaceae     | sf_3  | 694   | tongue dorsa clone DR011                                              | 6.121 | 0.000 | 0.000 |
| Proteobacteria | Helicobacteraceae    | sf_3  | 10562 | Helicobacter rappini W.Tee-Yu                                         | 6.132 | 0.000 | 0.000 |
| Proteobacteria | Helicobacteraceae    | sf_3  | 10548 | Helicobacter rappini W.Tee-Bat                                        | 6.132 | 0.001 | 0.000 |
| Proteobacteria | Bradyrhizobiaceae    | sf_1  | 7029  |                                                                       | 6.136 | 0.000 | 0.000 |
| Firmicutes     | Clostridiaceae       | sf_12 | 4300  | termite gut clone Rs-060                                              | 6.138 | 0.000 | 0.000 |
| Proteobacteria | Syntrophaceae        | sf_3  | 10067 | benzoate-degrading consortium clone BA044                             | 6.154 | 0.000 | 0.000 |
| Firmicutes     | Clostridiaceae       | sf_12 | 4297  |                                                                       | 6.173 | 0.000 | 0.000 |
| Proteobacteria | Helicobacteraceae    | sf_3  | 10552 | Helicobacter winghamensis str. NLEP 97-1611                           | 6.184 | 0.000 | 0.000 |
| Bacteroidetes  | Prevotellaceae       | sf_1  | 5893  | tongue dorsa clone DO045                                              | 6.185 | 0.000 | 0.000 |

|                   |                         |        |       |                                                                 |       |       |       |
|-------------------|-------------------------|--------|-------|-----------------------------------------------------------------|-------|-------|-------|
| Cyanobacteria     | Unclassified            | sf_1   | 5010  | LPP-group cyanobacterium isolate str. QSSC5cya QSSC5cya         | 6.192 | 0.000 | 0.000 |
| Proteobacteria    | Rhodocyclaceae          | sf_1   | 7762  | Elbe River snow isolate Iso18 Iso18_1411                        | 6.195 | 0.000 | 0.000 |
| Chloroflexi       | Unclassified            | sf_1   | 106   | DCP-dechlorinating consortium clone SHD-231                     | 6.229 | 0.000 | 0.000 |
| Firmicutes        | Clostridiaceae          | sf_12  | 4459  | termite gut clone Rs-109                                        | 6.239 | 0.000 | 0.000 |
| Actinobacteria    | Acidimicrobiaceae       | sf_1   | 1090  |                                                                 | 6.244 | 0.000 | 0.000 |
| Firmicutes        | Clostridiaceae          | sf_12  | 4582  | swine intestine clone p-2600-9F5                                | 6.244 | 0.000 | 0.000 |
| Firmicutes        | Lachnospiraceae         | sf_5   | 4514  | termite gut homogenate clone Rs-B34 bacterium                   | 6.245 | 0.000 | 0.000 |
| Actinobacteria    | Microthrixineae         | sf_1   | 1964  | bacterioplankton clone AEGEAN_247                               | 6.247 | 0.000 | 0.000 |
| Unclassified      | Unclassified            | sf_160 | 333   |                                                                 | 6.257 | 0.000 | 0.000 |
| Proteobacteria    | Sphingomonadaceae       | sf_1   | 6650  | Sphingomonas phyllosphaerae str. FA1                            | 6.264 | 0.000 | 0.000 |
| Proteobacteria    | Geobacteraceae          | sf_1   | 482   | trichloroethene-contaminated site clone FTLM205 proteobacterium | 6.265 | 0.000 | 0.000 |
| Bacteroidetes     | Flavobacteriaceae       | sf_1   | 5401  | Capnocytophaga gingivalis str. ChDC OS45                        | 6.298 | 0.000 | 0.000 |
| Natronoanaerobium | Unclassified            | sf_1   | 3570  | Bacillus sp. clone ML1228J-1                                    | 6.313 | 0.000 | 0.000 |
| Bacteroidetes     | Flavobacteriaceae       | sf_1   | 6104  |                                                                 | 6.334 | 0.000 | 0.000 |
| Firmicutes        | Peptococc/Acidaminococc | sf_11  | 862   | Megasphaera micronuciformis str. AIP 412.00; CIP 107280         | 6.343 | 0.000 | 0.000 |
| Proteobacteria    | Sphingomonadaceae       | sf_1   | 7440  | Sphingobium chungbukense str. DJ77                              | 6.383 | 0.000 | 0.000 |
| Firmicutes        | Enterococcaceae         | sf_1   | 3680  | Melissococcus plutonius str. NCDO 2440                          | 6.384 | 0.000 | 0.000 |
| Bacteroidetes     | Flavobacteriaceae       | sf_1   | 5301  |                                                                 | 6.395 | 0.000 | 0.000 |
| Proteobacteria    | Thiotrichaceae          | sf_3   | 8752  | Beggiatoa sp. str. MS-81-1c                                     | 6.405 | 0.000 | 0.000 |
| Proteobacteria    | Geobacteraceae          | sf_1   | 10171 |                                                                 | 6.408 | 0.000 | 0.000 |
| Proteobacteria    | Desulfoarculaceae       | sf_2   | 10227 | marine sediment clone Bol11                                     | 6.414 | 0.000 | 0.000 |

|                   |                    |       |       |                                                                |       |       |       |
|-------------------|--------------------|-------|-------|----------------------------------------------------------------|-------|-------|-------|
| Proteobacteria    | Unclassified       | sf_4  | 9884  | forested wetland clone RCP2-62                                 | 6.432 | 0.000 | 0.000 |
| Bacteroidetes     | Flavobacteriaceae  | sf_1  | 6269  | acidic forest soil clone UC1                                   | 6.432 | 0.000 | 0.000 |
| Bacteroidetes     | Flavobacteriaceae  | sf_1  | 5991  | Tenacibaculum ovolyticum str. IAM14318                         | 6.452 | 0.000 | 0.000 |
| Bacteroidetes     | Flavobacteriaceae  | sf_1  | 5436  | Arctic sea ice ARK10004                                        | 6.469 | 0.000 | 0.000 |
| Bacteroidetes     | Porphyromonadaceae | sf_1  | 5429  |                                                                | 6.471 | 0.000 | 0.000 |
| Firmicutes        | Lachnospiraceae    | sf_5  | 4510  | termite gut homogenate clone Rs-Q53 bacterium                  | 6.485 | 0.000 | 0.000 |
| Natronoanaerobium | Unclassified       | sf_1  | 4377  | Mono Lake at depth 35m station 6 July 2000 clone ML635J-65 G+C | 6.490 | 0.000 | 0.000 |
| Firmicutes        | Clostridiaceae     | sf_12 | 4310  | termite gut clone Rs-056                                       | 6.496 | 0.000 | 0.000 |
| Firmicutes        | Lactobacillaceae   | sf_1  | 3696  | Lactobacillus kalixensis str. Kx127A2;                         | 6.512 | 0.000 | 0.000 |
| Proteobacteria    | Campylobacteraceae | sf_3  | 10463 | Campylobacter subsp. fetus                                     | 6.518 | 0.000 | 0.000 |
| Proteobacteria    | Unclassified       | sf_1  | 7028  |                                                                | 6.518 | 0.000 | 0.000 |
| Firmicutes        | Lachnospiraceae    | sf_5  | 4540  | termite gut homogenate clone Rs-M18 bacterium                  | 6.526 | 0.000 | 0.000 |
| Proteobacteria    | Campylobacteraceae | sf_3  | 10397 | groundwater clone 1006                                         | 6.529 | 0.000 | 0.000 |
| Firmicutes        | Aerococcaceae      | sf_1  | 3504  | Marinilactibacillus psychrotolerans str. O21                   | 6.552 | 0.000 | 0.000 |
| Chlorobi          | Unclassified       | sf_8  | 636   | consortium clone Cart-N3 bacterium                             | 6.599 | 0.000 | 0.000 |
| TM7               | Unclassified       | sf_1  | 2697  | midgut homogenate Pachnoda ephippiata larva clone PeM47        | 6.637 | 0.000 | 0.000 |
| Bacteroidetes     | Flavobacteriaceae  | sf_1  | 6248  | Capnocytophaga sp. oral strain str. S3                         | 6.647 | 0.000 | 0.000 |
| Chloroflexi       | Unclassified       | sf_1  | 2534  | forest soil clone S085                                         | 6.647 | 0.000 | 0.000 |
| Firmicutes        | Enterococcaceae    | sf_1  | 3433  | Tetragenococcus muriaticus                                     | 6.660 | 0.000 | 0.000 |
| Proteobacteria    | Neisseriaceae      | sf_1  | 8092  | Neisseria dentiae str. V33                                     | 6.666 | 0.000 | 0.000 |
| Proteobacteria    | Unclassified       | sf_3  | 9813  | hydrothermal sediment clone AF420340                           | 6.688 | 0.000 | 0.000 |

|                |                         |       |      |                                                                |       |       |       |
|----------------|-------------------------|-------|------|----------------------------------------------------------------|-------|-------|-------|
| Firmicutes     | Lactobacillaceae        | sf_1  | 3885 | Pediococcus pentosaceus                                        | 6.692 | 0.000 | 0.000 |
| Firmicutes     | Enterococcaceae         | sf_1  | 3298 | Enterococcus saccharolyticus str. LMG 11427                    | 6.697 | 0.000 | 0.000 |
| Firmicutes     | Lactobacillaceae        | sf_1  | 3490 | Lactobacillus suntoryeus str. LH                               | 6.699 | 0.000 | 0.000 |
| Firmicutes     | Enterococcaceae         | sf_1  | 3382 |                                                                | 6.700 | 0.000 | 0.000 |
| Chloroflexi    | Unclassified            | sf_1  | 76   | DCP-dechlorinating consortium clone SHA-147                    | 6.703 | 0.000 | 0.000 |
| Firmicutes     | Paenibacillaceae        | sf_1  | 3641 | Brevibacillus sp. MN 47.2a                                     | 6.736 | 0.000 | 0.000 |
| Acidobacteria  | Acidobacteriaceae       | sf_14 | 6364 | Solibacter usitatus Ellin6076                                  | 6.754 | 0.000 | 0.000 |
| Chloroflexi    | Unclassified            | sf_1  | 258  | DCP-dechlorinating consortium clone SHD-14                     | 6.765 | 0.000 | 0.000 |
| Firmicutes     | Lactobacillaceae        | sf_1  | 3330 | Lactobacillus kitasatonis str. KM9212                          | 6.780 | 0.000 | 0.000 |
| Firmicutes     | Lachnospiraceae         | sf_5  | 4155 | termite gut homogenate clone Rs-K92 bacterium                  | 6.800 | 0.000 | 0.000 |
| Bacteroidetes  | Flavobacteriaceae       | sf_1  | 5836 | Capnocytophaga granulosa str. LMG 12119; FDC SD4               | 6.803 | 0.000 | 0.000 |
| Actinobacteria | Unclassified            | sf_1  | 1898 | termite gut homogenate clone Rs-J10 bacterium                  | 6.839 | 0.000 | 0.000 |
| Firmicutes     | Peptococc/Acidaminococc | sf_11 | 392  | oral endodontic infection clone MCE7_134                       | 6.843 | 0.000 | 0.000 |
| Firmicutes     | Lactobacillaceae        | sf_1  | 3703 | Lactobacillus salivarius str. RA2115                           | 6.858 | 0.000 | 0.000 |
| Bacteroidetes  | Porphyromonadaceae      | sf_1  | 5713 | Porphyromonas catoniae str. ATCC 51270                         | 6.878 | 0.000 | 0.000 |
| Bacteroidetes  | Flexibacteraceae        | sf_19 | 5602 |                                                                | 6.893 | 0.000 | 0.000 |
| Firmicutes     | Enterococcaceae         | sf_1  | 3318 | Enterococcus ratti str. ATCC 700914                            | 6.926 | 0.000 | 0.000 |
| Firmicutes     | Enterococcaceae         | sf_1  | 3261 | Enterococcus mundtii str. LMG 10748                            | 6.954 | 0.000 | 0.000 |
| Bacteroidetes  | Flexibacteraceae        | sf_19 | 6124 | Flexibacter flexilis subsp. pelliculosus str. IFO 16028 subsp. | 6.993 | 0.000 | 0.000 |
| Firmicutes     | Clostridiaceae          | sf_12 | 4180 | termite gut homogenate clone Rs-M23 bacterium                  | 7.013 | 0.000 | 0.000 |
| Firmicutes     | Lactobacillaceae        | sf_1  | 3526 | Lactobacillus sakei                                            | 7.059 | 0.000 | 0.000 |



|                |                   |       |      |                                               |       |       |       |
|----------------|-------------------|-------|------|-----------------------------------------------|-------|-------|-------|
| Firmicutes     | Lachnospiraceae   | sf_5  | 4281 | granular sludge clone UASB_brew_B86           | 7.083 | 0.000 | 0.000 |
| Firmicutes     | Enterococcaceae   | sf_1  | 3713 | Enterococcus cecorum str. ATCC43198           | 7.091 | 0.000 | 0.000 |
| Firmicutes     | Aerococcaceae     | sf_1  | 3833 | Carnobacterium alterfunditum                  | 7.119 | 0.000 | 0.000 |
| Firmicutes     | Clostridiaceae    | sf_12 | 4475 | termite gut homogenate clone Rs-N02 bacterium | 7.217 | 0.000 | 0.000 |
| Acidobacteria  | Unclassified      | sf_1  | 6367 | TCE-contaminated site clone FTL227            | 7.324 | 0.000 | 0.000 |
| Acidobacteria  | Unclassified      | sf_1  | 6357 | anaerobic benzene-degrading clone Cart-N4     | 7.498 | 0.000 | 0.000 |
| Firmicutes     | Enterococcaceae   | sf_1  | 3881 | Enterococcus dispar str. LMG 13521            | 7.614 | 0.000 | 0.000 |
| Proteobacteria | Pasteurellaceae   | sf_1  | 9213 | Haemophilus quentini str. MCCM 02026          | 7.728 | 0.000 | 0.000 |
| Chlorobi       | Unclassified      | sf_8  | 549  | consortium clone Cart-N2 bacterium            | 7.762 | 0.000 | 0.000 |
| Firmicutes     | Lachnospiraceae   | sf_5  | 4331 | granular sludge clone UASB_brew_B84           | 7.854 | 0.000 | 0.000 |
| Firmicutes     | Aerococcaceae     | sf_1  | 3870 | Abiotrophia para-adiacens str. TKT1           | 7.870 | 0.000 | 0.000 |
| Firmicutes     | Lachnospiraceae   | sf_5  | 4512 | granular sludge clone UASB_brew_B25           | 7.902 | 0.000 | 0.000 |
| Bacteroidetes  | Flavobacteriaceae | sf_1  | 5726 | Bergeyella sp. oral AK152 clone               | 8.319 | 0.000 | 0.000 |
| Firmicutes     | Enterococcaceae   | sf_1  | 3598 | Enterococcus solitarius str. DSM 5634         | 8.419 | 0.000 | 0.000 |

**Table S3. Bacterial taxa significantly correlated with sinus symptom severity.**

| Phylum          | Family              | SF     | Taxon ID | prokMSA Name                                                | Estimate | P value | Q value |
|-----------------|---------------------|--------|----------|-------------------------------------------------------------|----------|---------|---------|
| Actinobacteria  | Corynebacteriaceae  | sf_1   | 1493     | Corynebacterium tuberculostearicum str. CIP102346           | 0.622    | 0.018   | 0.035   |
| Actinobacteria  | Corynebacteriaceae  | sf_1   | 1192     | Corynebacterium segmentosum str. CIP107068 (CCUG37878)      | 0.551    | 0.041   | 0.035   |
| Firmicutes      | Lactobacillaceae    | sf_1   | 3547     | Lactobacillus frumenti str. TMW 1.666                       | -0.532   | 0.050   | 0.035   |
| Proteobacteria  | Helicobacteraceae   | sf_3   | 10520    | Helicobacter sp. blood isolate 964                          | -0.533   | 0.050   | 0.035   |
| Proteobacteria  | Campylobacteraceae  | sf_3   | 10538    | Arcobacter cryaerophilus                                    | -0.533   | 0.050   | 0.035   |
| Unclassified    | Unclassified        | sf_106 | 243      | hot spring clone OPB25                                      | -0.533   | 0.050   | 0.035   |
| Proteobacteria  | Nitrospiraceae      | sf_2   | 594      | uranium mining mill tailing clone GR-296.II.52 GR-296.I.52  | -0.533   | 0.049   | 0.035   |
| Firmicutes      | Acholeplasmataceae  | sf_1   | 3977     | Chinaberry yellows phytoplasma str. CbY1                    | -0.534   | 0.049   | 0.035   |
| Bacteroidetes   | Porphyromonadaceae  | sf_1   | 5429     |                                                             | -0.534   | 0.049   | 0.035   |
| Cyanobacteria   | Chloroplasts        | sf_5   | 5040     | Solanum nigrum                                              | -0.534   | 0.049   | 0.035   |
| Proteobacteria  | Bradyrhizobiaceae   | sf_1   | 7390     | Afipia genosp. 10 str. G8996                                | -0.534   | 0.049   | 0.035   |
| Firmicutes      | Lachnospiraceae     | sf_5   | 2994     | termite gut clone Rs-L15                                    | -0.534   | 0.049   | 0.035   |
| Synergistes     | Unclassified        | sf_3   | 117      | termite gut homogenate clone Rs-D89                         | -0.534   | 0.049   | 0.035   |
| Bacteroidetes   | Flavobacteriaceae   | sf_1   | 5401     | Capnocytophaga gingivalis str. ChDC OS45                    | -0.534   | 0.049   | 0.035   |
| Proteobacteria  | Desulfobacteraceae  | sf_5   | 10046    | Desulfobacterium cetonicum str. DSM 7267 oil recovery water | -0.534   | 0.049   | 0.035   |
| Verrucomicrobia | Verrucomicrobiaceae | sf_6   | 613      | hydrothermal vent polychaete mucous clone P. palm C 85      | -0.534   | 0.049   | 0.035   |
| Proteobacteria  | Unclassified        | sf_1   | 10427    | hydrothermal vent clone CH3_17_BAC_16SrRNA_9N_EPR           | -0.534   | 0.049   | 0.035   |
| Actinobacteria  | Micrococcaceae      | sf_1   | 1686     | Yania halotolerans str. YIM 70085                           | -0.535   | 0.049   | 0.035   |
| Unclassified    | Unclassified        | sf_160 | 4410     |                                                             | -0.535   | 0.049   | 0.035   |

|                |                         |       |       |                                                                            |        |       |       |
|----------------|-------------------------|-------|-------|----------------------------------------------------------------------------|--------|-------|-------|
| Cyanobacteria  | Unclassified            | sf_1  | 5010  | LPP-group cyanobacterium isolate str. QSSC5cya QSSC5cya                    | -0.535 | 0.049 | 0.035 |
| Acidobacteria  | Unclassified            | sf_1  | 6357  | anaerobic benzene-degrading clone Cart-N4                                  | -0.535 | 0.049 | 0.035 |
| Proteobacteria | Unclassified            | sf_3  | 8961  | Calyptogena magnifica symbiont                                             | -0.535 | 0.049 | 0.035 |
| Firmicutes     | Acholeplasmataceae      | sf_1  | 3945  | Ash witches'-broom phytoplasma str. AshWB                                  | -0.535 | 0.049 | 0.035 |
| Firmicutes     | Lachnospiraceae         | sf_5  | 2693  | ruminantium str. GA195                                                     | -0.535 | 0.048 | 0.035 |
| Firmicutes     | Peptococc/Acidaminococc | sf_11 | 865   | Selenomonas sputigena str. ATCC 35185                                      | -0.535 | 0.048 | 0.035 |
| Firmicutes     | Paenibacillaceae        | sf_1  | 3641  | Brevibacillus sp. MN 47.2a                                                 | -0.536 | 0.048 | 0.035 |
| Planctomycetes | Planctomycetaceae       | sf_3  | 4855  | aerobic basin clone CY0ARA026D10                                           | -0.536 | 0.048 | 0.035 |
| Firmicutes     | Lactobacillaceae        | sf_1  | 3696  | Lactobacillus kalixensis str. Kx127A2; LMG 22115T; DSM 16043T; CCUG 48459T | -0.537 | 0.048 | 0.035 |
| Proteobacteria | Unclassified            | sf_1  | 10259 |                                                                            | -0.537 | 0.048 | 0.035 |
| Firmicutes     | Unclassified            | sf_1  | 2541  | UASB granular sludge clone UT-2                                            | -0.537 | 0.048 | 0.035 |
| Firmicutes     | Lachnospiraceae         | sf_5  | 2681  | termite gut homogenate clone Rs-K41 bacterium                              | -0.537 | 0.048 | 0.035 |
| Proteobacteria | Bradyrhizobiaceae       | sf_1  | 7126  | ground water Tomsk-7 clone S15A-MN96 proteobacterium                       | -0.537 | 0.048 | 0.035 |
| Firmicutes     | Syntrophomonadaceae     | sf_5  | 2483  | trichloroethene-contaminated site clone FTLM142 bacterium                  | -0.538 | 0.047 | 0.035 |
| Firmicutes     | Peptococc/Acidaminococc | sf_11 | 131   | pig feces clone                                                            | -0.538 | 0.047 | 0.035 |
| Proteobacteria | Unclassified            | sf_3  | 8587  | Mars Odyssey Orbiter and encapsulation facility clone T5-3                 | -0.538 | 0.047 | 0.035 |
| Bacteroidetes  | Flavobacteriaceae       | sf_1  | 5906  | Capnocytophaga sputigena str. ATCC 33612                                   | -0.538 | 0.047 | 0.035 |
| Bacteroidetes  | Flavobacteriaceae       | sf_1  | 5933  | Flavobacterium columnare str. PH-97028 (IAM 14821)                         | -0.538 | 0.047 | 0.035 |
| Firmicutes     | Lachnospiraceae         | sf_5  | 2965  | oral endodontic infection clone MCE9_173                                   | -0.538 | 0.047 | 0.035 |
| Actinobacteria | Micrococcaceae          | sf_1  | 1494  | Arthrobacter agilis str. DSM 20550                                         | -0.538 | 0.047 | 0.035 |
| BRC1           | Unclassified            | sf_1  | 5143  | soil clone PBS-II-1                                                        | -0.538 | 0.047 | 0.035 |

|                |                         |       |       |                                                             |        |       |       |
|----------------|-------------------------|-------|-------|-------------------------------------------------------------|--------|-------|-------|
| Firmicutes     | Enterococcaceae         | sf_1  | 3298  | Enterococcus saccharolyticus str. LMG 11427                 | -0.539 | 0.047 | 0.035 |
| Cyanobacteria  | Unclassified            | sf_9  | 5038  | Rumen isolate str. YS2                                      | -0.539 | 0.047 | 0.035 |
| Firmicutes     | Lachnospiraceae         | sf_5  | 4335  | termite gut homogenate clone Rs-N86 bacterium               | -0.539 | 0.047 | 0.035 |
| Firmicutes     | Aerococcaceae           | sf_1  | 3504  | Marinilactibacillus psychrotolerans str. O21                | -0.540 | 0.046 | 0.035 |
| Bacteroidetes  | Unclassified            | sf_15 | 5257  | marine? clone KD3-67                                        | -0.540 | 0.046 | 0.035 |
| Firmicutes     | Peptococc/acidaminococc | sf_11 | 534   | chlorobenzene-degrading consortium clone IIA-26             | -0.540 | 0.046 | 0.035 |
| Spirochaetes   | Spirochaetaceae         | sf_1  | 6526  | Treponema sp. str. 7CPL208                                  | -0.540 | 0.046 | 0.035 |
| Actinobacteria | Micrococcaceae          | sf_1  | 1573  | Arthrobacter nicotianae str. SB42                           | -0.541 | 0.046 | 0.035 |
| Proteobacteria | Desulfoarculaceae       | sf_2  | 10227 | marine sediment clone Bol11                                 | -0.541 | 0.046 | 0.035 |
| Firmicutes     | Clostridiaceae          | sf_12 | 4278  | granular sludge clone R1p16                                 | -0.541 | 0.046 | 0.035 |
| Proteobacteria | Unclassified            | sf_1  | 7060  |                                                             | -0.541 | 0.046 | 0.035 |
| Bacteroidetes  | Unclassified            | sf_4  | 5785  | Mono Lake at depth 35 m station 6 July 2000 clone ML635J-56 | -0.541 | 0.046 | 0.035 |
| Firmicutes     | Streptococcaceae        | sf_1  | 3499  | Streptococcus constellatus str. ATCC27823                   | -0.542 | 0.045 | 0.035 |
| Firmicutes     | Clostridiaceae          | sf_12 | 4177  | Clostridium subterminale DSM 2636                           | -0.542 | 0.045 | 0.035 |
| Bacteroidetes  | Rikenellaceae           | sf_5  | 5889  | termite gut homogenate clone Rs-F73 bacterium               | -0.542 | 0.045 | 0.035 |
| Proteobacteria | Bdellovibrionaceae      | sf_1  | 10010 | uranium mining waste pile clone JG37-AG-139 proteobacterium | -0.542 | 0.045 | 0.035 |
| Firmicutes     | Peptococc/acidaminococc | sf_11 | 392   | oral endodontic infection clone MCE7_134                    | -0.542 | 0.045 | 0.035 |
| Bacteroidetes  | Sphingobacteriaceae     | sf_1  | 5513  | crevicular epithelial cells clone AZ123                     | -0.543 | 0.045 | 0.035 |
| Firmicutes     | Mycoplasmataceae        | sf_1  | 3929  | Mycoplasma gypsibengalensis str. Gb-V33                     | -0.543 | 0.045 | 0.035 |
| Firmicutes     | Clostridiaceae          | sf_12 | 4300  | termite gut clone Rs-060                                    | -0.543 | 0.045 | 0.035 |
| Proteobacteria | Campylobacteraceae      | sf_3  | 10484 | Campylobacter helveticus                                    | -0.543 | 0.045 | 0.035 |

|                |                             |       |       |                                                                       |        |       |       |
|----------------|-----------------------------|-------|-------|-----------------------------------------------------------------------|--------|-------|-------|
| OP10           | Unclassified                | sf_1  | 514   | sludge clone SBRA136                                                  | -0.543 | 0.045 | 0.035 |
| Proteobacteria | Syntrophobacteraceae        | sf_1  | 10221 | granular sludge clone R3p4                                            | -0.543 | 0.045 | 0.035 |
| Firmicutes     | Lactobacillaceae            | sf_1  | 3330  | Lactobacillus kitasatonis str. KM9212                                 | -0.544 | 0.044 | 0.035 |
| BRC1           | Unclassified                | sf_2  | 118   | penguin droppings sediments clone KD1-1                               | -0.544 | 0.044 | 0.035 |
| Firmicutes     | Peptococc/Acidaminoc<br>occ | sf_11 | 39    | forested wetland clone RCP2-71                                        | -0.544 | 0.044 | 0.035 |
| Proteobacteria | Pasteurellaceae             | sf_1  | 9213  | Haemophilus quentini str. MCCM 02026                                  | -0.544 | 0.044 | 0.035 |
| Firmicutes     | Streptococcaceae            | sf_1  | 3629  | Streptococcus mutans str. UA96                                        | -0.544 | 0.044 | 0.035 |
| Proteobacteria | Unclassified                | sf_9  | 9760  | deep marine sediment clone MB-A2-137                                  | -0.545 | 0.044 | 0.035 |
| Firmicutes     | Unclassified                | sf_17 | 926   |                                                                       | -0.546 | 0.044 | 0.035 |
| Firmicutes     | Staphylococcaceae           | sf_1  | 3524  | Gemella haemolysans                                                   | -0.546 | 0.043 | 0.035 |
| Proteobacteria | Syntrophobacteraceae        | sf_1  | 10021 | uranium mill tailings soil sample clone Sh765B-TzT-29 proteobacterium | -0.546 | 0.043 | 0.035 |
| Actinobacteria | Micrococcaceae              | sf_1  | 1593  | Arthrobacter globiformis                                              | -0.546 | 0.043 | 0.035 |
| Proteobacteria | Desulfobacteraceae          | sf_5  | 9875  | hydrothermal sediment clone AF420354                                  | -0.546 | 0.043 | 0.035 |
| Cyanobacteria  | Chloroplasts                | sf_5  | 4966  | Adiantum pedatum                                                      | -0.547 | 0.043 | 0.035 |
| Bacteroidetes  | Prevotellaceae              | sf_1  | 5893  | tongue dorsa clone DO045                                              | -0.547 | 0.043 | 0.035 |
| Firmicutes     | Peptococc/Acidaminoc<br>occ | sf_11 | 562   | oral endodontic infection clone MCE10_265                             | -0.547 | 0.043 | 0.035 |
| Chlorobi       | Unclassified                | sf_8  | 636   | benzene-degrading nitrate-reducing consortium clone Cart-N3 bacterium | -0.547 | 0.043 | 0.035 |
| Firmicutes     | Carnobacteriaceae           | sf_1  | 3536  |                                                                       | -0.548 | 0.043 | 0.035 |
| Bacteroidetes  | Flavobacteriaceae           | sf_1  | 5473  |                                                                       | -0.548 | 0.043 | 0.035 |
| Proteobacteria | Syntrophobacteraceae        | sf_1  | 9845  | uranium mining waste pile clone JG37-AG-128 proteobacterium           | -0.548 | 0.042 | 0.035 |
| Proteobacteria | Campylobacteraceae          | sf_3  | 10540 | Campylobacter showae str. LMG 12636                                   | -0.549 | 0.042 | 0.035 |

|                   |                   |        |      |                                                                |        |       |       |
|-------------------|-------------------|--------|------|----------------------------------------------------------------|--------|-------|-------|
| Proteobacteria    | Sphingomonadaceae | sf_1   | 7100 | Novosphingobium capsulatum str. GIFU11526                      | -0.549 | 0.042 | 0.035 |
| Proteobacteria    | Bradyrhizobiaceae | sf_1   | 6887 | Bradyrhizobium str. YB2                                        | -0.549 | 0.042 | 0.035 |
| Chloroflexi       | Unclassified      | sf_1   | 76   | DCP-dechlorinating consortium clone SHA-147                    | -0.550 | 0.042 | 0.035 |
| Firmicutes        | Clostridiaceae    | sf_12  | 4265 | termite gut homogenate clone Rs-N70 bacterium                  | -0.550 | 0.042 | 0.035 |
| Bacteroidetes     | Flavobacteriaceae | sf_1   | 5436 | Arctic sea ice ARK10004                                        | -0.550 | 0.042 | 0.035 |
| Actinobacteria    | Unclassified      | sf_1   | 1898 | termite gut homogenate clone Rs-J10 bacterium                  | -0.550 | 0.041 | 0.035 |
| Firmicutes        | Aerococcaceae     | sf_1   | 3631 | Abiotrophia defectiva str. GIFU12707 (ATCC49176)               | -0.550 | 0.041 | 0.035 |
| Firmicutes        | Streptococcaceae  | sf_1   | 3753 | Streptococcus suis str. 8074                                   | -0.551 | 0.041 | 0.035 |
| Bacteroidetes     | Flexibacteraceae  | sf_19  | 6124 | Flexibacter flexilis subsp. pelliculosus str. IFO 16028 subsp. | -0.551 | 0.041 | 0.035 |
| Firmicutes        | Enterococcaceae   | sf_1   | 3382 |                                                                | -0.551 | 0.041 | 0.035 |
| Firmicutes        | Leuconostocaceae  | sf_1   | 3573 | Leuconostoc ficulneum str. FS-1                                | -0.551 | 0.041 | 0.035 |
| Firmicutes        | Streptococcaceae  | sf_1   | 3422 | Streptococcus thermophilus str. DSM 20617                      | -0.551 | 0.041 | 0.035 |
| Firmicutes        | Lachnospiraceae   | sf_5   | 4315 | termite gut homogenate clone Rs-N94 bacterium                  | -0.551 | 0.041 | 0.035 |
| Unclassified      | Unclassified      | sf_160 | 7444 |                                                                | -0.551 | 0.041 | 0.035 |
| Bacteroidetes     | Flexibacteraceae  | sf_19  | 6261 | Arctic sea ice cryoconite clone ARKCRY-50                      | -0.552 | 0.041 | 0.035 |
| Planctomycetes    | Planctomycetaceae | sf_3   | 4948 | anoxic basin clone CY0ARA027D01                                | -0.552 | 0.040 | 0.035 |
| Firmicutes        | Streptococcaceae  | sf_1   | 3253 | derived cheese sample clone 32CR                               | -0.553 | 0.040 | 0.035 |
| Firmicutes        | Clostridiaceae    | sf_12  | 4614 | Clostridium sp. str. JC3                                       | -0.553 | 0.040 | 0.035 |
| Bacteroidetes     | Flavobacteriaceae | sf_1   | 5267 | bacterioplankton clone AEGEAN_179                              | -0.554 | 0.040 | 0.035 |
| Natronoanaerobium | Unclassified      | sf_1   | 4377 | Mono Lake at depth 35m station 6 July 2000 clone ML635J-65 G+C | -0.554 | 0.040 | 0.035 |
| OP9/JS1           | Unclassified      | sf_1   | 2489 | Guaymas Basin hydrothermal vent sediments clone B01R005        | -0.554 | 0.040 | 0.035 |

|                |                         |       |       |                                                          |        |       |       |
|----------------|-------------------------|-------|-------|----------------------------------------------------------|--------|-------|-------|
| Chloroflexi    | Unclassified            | sf_1  | 2534  | forest soil clone S085                                   | -0.554 | 0.040 | 0.035 |
| Bacteroidetes  | Unclassified            | sf_15 | 5957  | hydrothermal vent polychaete mucous clone P. palm C/A 20 | -0.554 | 0.040 | 0.035 |
| Firmicutes     | Lactobacillaceae        | sf_1  | 3521  | Pediococcus inopinatus str. DSM 20285                    | -0.555 | 0.039 | 0.035 |
| Firmicutes     | Unclassified            | sf_1  | 77    | thermal soil clone YNPFFP9                               | -0.555 | 0.039 | 0.035 |
| Firmicutes     | Clostridiaceae          | sf_12 | 4550  | swine intestine clone p-320-a3                           | -0.556 | 0.039 | 0.035 |
| Firmicutes     | Lachnospiraceae         | sf_5  | 2668  | termite gut homogenate clone Rs-G40 bacterium            | -0.556 | 0.039 | 0.035 |
| Actinobacteria | Micrococcaceae          | sf_1  | 1557  | Arthrobacter oxydans str. DSM 20119                      | -0.556 | 0.039 | 0.035 |
| Firmicutes     | Clostridiaceae          | sf_12 | 4459  | termite gut clone Rs-109                                 | -0.557 | 0.039 | 0.035 |
| Bacteroidetes  | Flavobacteriaceae       | sf_1  | 5521  | Flavobacteriaceae str. SW269                             | -0.557 | 0.039 | 0.035 |
| Proteobacteria | Campylobacteraceae      | sf_3  | 10397 | groundwater clone 1006                                   | -0.557 | 0.039 | 0.035 |
| Proteobacteria | Unclassified            | sf_9  | 9876  | deep marine sediment clone MB-B2-106                     | -0.557 | 0.039 | 0.035 |
| Firmicutes     | Lachnospiraceae         | sf_5  | 4514  | termite gut homogenate clone Rs-B34 bacterium            | -0.557 | 0.039 | 0.035 |
| Proteobacteria | Polyangiaceae           | sf_4  | 9733  | bacterioplankton clone ZA3735c                           | -0.557 | 0.038 | 0.035 |
| Firmicutes     | Unclassified            | sf_1  | 522   | UASB granular sludge clone UT-1                          | -0.558 | 0.038 | 0.035 |
| Firmicutes     | Streptococcaceae        | sf_1  | 3722  | Lactococcus Il1403 subsp. lactis str. IL1403             | -0.558 | 0.038 | 0.035 |
| Firmicutes     | Peptococc/Acidaminococc | sf_11 | 304   | Selenomonas ruminantium str.JCM6582                      | -0.558 | 0.038 | 0.035 |
| Firmicutes     | Lactobacillaceae        | sf_1  | 3885  | Pediococcus pentosaceus                                  | -0.558 | 0.038 | 0.035 |
| Proteobacteria | Sphingomonadaceae       | sf_1  | 7440  | Sphingobium chungbukense str. DJ77                       | -0.558 | 0.038 | 0.035 |
| Firmicutes     | Aerococcaceae           | sf_1  | 3326  | Nostocoida limicola I str. Ben206                        | -0.558 | 0.038 | 0.035 |
| Bacteroidetes  | Flexibacteraceae        | sf_19 | 5602  |                                                          | -0.559 | 0.038 | 0.035 |
| Proteobacteria | Polyangiaceae           | sf_3  | 10298 | marine tidal mat clone BTM36                             | -0.559 | 0.038 | 0.035 |

|                |                             |       |       |                                                            |        |       |       |
|----------------|-----------------------------|-------|-------|------------------------------------------------------------|--------|-------|-------|
| Firmicutes     | Bacillaceae                 | sf_1  | 3900  | Bacillus licheniformis str. DSM 13                         | -0.559 | 0.038 | 0.035 |
| Bacteroidetes  | Rikenellaceae               | sf_5  | 5892  | anoxic bulk soil flooded rice microcosm clone BSV73        | -0.559 | 0.038 | 0.035 |
| Proteobacteria | Pasteurellaceae             | sf_1  | 8195  | Haemophilus influenzae str. R2866                          | -0.559 | 0.038 | 0.035 |
| Chlorobi       | Chlorobiaceae               | sf_1  | 859   | Chlorobium phaeovibrioides str. 2631                       | -0.560 | 0.037 | 0.035 |
| Firmicutes     | Clostridiaceae              | sf_12 | 4477  | termite gut homogenate clone Rs-N85 bacterium              | -0.560 | 0.037 | 0.035 |
| Proteobacteria | Unclassified                | sf_9  | 244   | deep marine sediment clone MB-C2-152                       | -0.560 | 0.037 | 0.035 |
| Bacteroidetes  | Flavobacteriaceae           | sf_1  | 6248  | Capnocytophaga sp. oral strain str. S3                     | -0.560 | 0.037 | 0.035 |
| Proteobacteria | Unclassified                | sf_1  | 10084 | acid mine drainage clone AS6                               | -0.561 | 0.037 | 0.035 |
| Firmicutes     | Streptococcaceae            | sf_1  | 3588  | Streptococcus downei str. ATCC 33748                       | -0.561 | 0.037 | 0.035 |
| Firmicutes     | Peptococc/Acidaminoc<br>occ | sf_11 | 1036  | Great Artesian Basin clone G07                             | -0.561 | 0.037 | 0.035 |
| Chloroflexi    | Unclassified                | sf_1  | 2397  | deep marine sediment clone MB-C2-127                       | -0.561 | 0.037 | 0.035 |
| Actinobacteria | Micrococcaceae              | sf_1  | 2020  | Rothia dentocariosa str. ChDC B200                         | -0.561 | 0.037 | 0.035 |
| Bacteroidetes  | Unclassified                | sf_15 | 5353  | trichloroethene-contaminated site clone FTLpost3 bacterium | -0.561 | 0.037 | 0.035 |
| Bacteroidetes  | Flavobacteriaceae           | sf_1  | 5991  | Tenacibaculum ovolyticum str. IAM14318                     | -0.562 | 0.037 | 0.035 |
| Proteobacteria | Sphingomonadaceae           | sf_1  | 7036  | Lutibacterium anuloederans str. LC8                        | -0.562 | 0.036 | 0.035 |
| Cyanobacteria  | Chloroplasts                | sf_5  | 5147  | Emiliana huxleyi str. Plymouth Marine Laborator PML 92     | -0.562 | 0.036 | 0.035 |
| Actinobacteria | Acidimicrobiaceae           | sf_1  | 1090  |                                                            | -0.562 | 0.036 | 0.035 |
| Proteobacteria | Unclassified                | sf_3  | 9813  | hydrothermal sediment clone AF420340                       | -0.562 | 0.036 | 0.035 |
| Firmicutes     | Enterococcaceae             | sf_1  | 3433  | Tetragenococcus muriaticus                                 | -0.563 | 0.036 | 0.035 |
| Firmicutes     | Acholeplasmataceae          | sf_1  | 4044  |                                                            | -0.563 | 0.036 | 0.035 |
| TM7            | Unclassified                | sf_1  | 8040  | oral cavity clone BE109                                    | -0.563 | 0.036 | 0.035 |



|                |                         |       |      |                                                                |        |       |       |
|----------------|-------------------------|-------|------|----------------------------------------------------------------|--------|-------|-------|
| Bacteroidetes  | Porphyromonadaceae      | sf_1  | 5295 | swine intestine clone p-987-s962-5                             | -0.563 | 0.036 | 0.035 |
| Bacteroidetes  | Flavobacteriaceae       | sf_1  | 5914 | Psychroserpens burtonensis str. S2-64                          | -0.564 | 0.036 | 0.035 |
| Firmicutes     | Lachnospiraceae         | sf_5  | 4613 | rumen clone 3C0d-3                                             | -0.564 | 0.036 | 0.035 |
| Firmicutes     | Acholeplasmataceae      | sf_1  | 4046 | Pigeon pea witches'-broom mycoplasma-like organism             | -0.564 | 0.036 | 0.035 |
| Bacteroidetes  | Flavobacteriaceae       | sf_1  | 6269 | acidic forest soil clone UC1                                   | -0.564 | 0.036 | 0.035 |
| OP9/JS1        | Unclassified            | sf_1  | 969  | DCP-dechlorinating consortium clone SHA-1                      | -0.564 | 0.036 | 0.035 |
| Firmicutes     | Clostridiaceae          | sf_12 | 4180 | termite gut homogenate clone Rs-M23 bacterium                  | -0.564 | 0.036 | 0.035 |
| Cyanobacteria  | Chloroplasts            | sf_5  | 4976 | Calypogeia muelleriana                                         | -0.564 | 0.036 | 0.035 |
| Firmicutes     | Enterococcaceae         | sf_1  | 3261 | Enterococcus mundtii str. LMG 10748                            | -0.565 | 0.035 | 0.035 |
| Actinobacteria | Micrococcaceae          | sf_1  | 1324 | glacial ice isolate str. CanDirty1                             | -0.566 | 0.035 | 0.035 |
| Firmicutes     | Peptococc/Acidaminococc | sf_11 | 761  | Anaeroglobus geminatus str. AIP313.00; CIP 106856; CCUG 44773  | -0.566 | 0.035 | 0.035 |
| Bacteroidetes  | Unclassified            | sf_15 | 5475 | SHA-25 clone                                                   | -0.566 | 0.035 | 0.035 |
| Planctomycetes | Planctomycetaceae       | sf_3  | 4831 | Planctomyces brasiliensis                                      | -0.566 | 0.035 | 0.035 |
| Firmicutes     | Lachnospiraceae         | sf_5  | 4510 | termite gut homogenate clone Rs-Q53 bacterium                  | -0.566 | 0.035 | 0.035 |
| Firmicutes     | Lactobacillaceae        | sf_1  | 3767 | Lactobacillus suebicus str. CECT 5917T                         | -0.567 | 0.035 | 0.035 |
| Firmicutes     | Peptococc/Acidaminococc | sf_11 | 709  | Selenomonas ruminantium str.S20                                | -0.567 | 0.034 | 0.035 |
| Proteobacteria | Unclassified            | sf_4  | 9884 | forested wetland clone RCP2-62                                 | -0.567 | 0.034 | 0.035 |
| Firmicutes     | Leuconostocaceae        | sf_1  | 3497 | Weissella koreensis S-5673                                     | -0.567 | 0.034 | 0.035 |
| Firmicutes     | Enterococcaceae         | sf_1  | 3713 | Enterococcus cecorum str. ATCC43198                            | -0.568 | 0.034 | 0.035 |
| Firmicutes     | Lactobacillaceae        | sf_1  | 3566 | Lactobacillus pontis str. LTH 2587                             | -0.569 | 0.034 | 0.035 |
| Firmicutes     | Unclassified            | sf_8  | 4536 | Mono Lake at depth 35m station 6 July 2000 clone ML635J-14 G+C | -0.569 | 0.034 | 0.035 |

|                |                             |       |       |                                                       |        |       |       |
|----------------|-----------------------------|-------|-------|-------------------------------------------------------|--------|-------|-------|
| Firmicutes     | Unclassified                | sf_1  | 3481  |                                                       | -0.569 | 0.034 | 0.035 |
| Proteobacteria | Syntrophobacteraceae        | sf_1  | 9661  | DCP-dechlorinating consortium clone SHD-1             | -0.570 | 0.033 | 0.035 |
| Proteobacteria | Desulfobacteraceae          | sf_5  | 10364 | marine surface sediment clone SB2                     | -0.570 | 0.033 | 0.035 |
| Firmicutes     | Lachnospiraceae             | sf_5  | 2943  | human thigh wound isolate str. MDA2477                | -0.571 | 0.033 | 0.035 |
| Firmicutes     | Enterococcaceae             | sf_1  | 3318  | Enterococcus ratti str. ATCC 700914                   | -0.571 | 0.033 | 0.035 |
| Bacteroidetes  | Porphyromonadaceae          | sf_1  | 6012  | mouse feces clone L11-6                               | -0.571 | 0.033 | 0.035 |
| Firmicutes     | Clostridiaceae              | sf_12 | 4554  | termite gut clone Rs-068                              | -0.571 | 0.033 | 0.035 |
| Firmicutes     | Lactobacillaceae            | sf_1  | 3490  | Lactobacillus suntoryeus str. LH                      | -0.571 | 0.033 | 0.035 |
| Firmicutes     | Clostridiaceae              | sf_12 | 4582  | swine intestine clone p-2600-9F5                      | -0.573 | 0.032 | 0.035 |
| Firmicutes     | Peptococc/Acidaminoc<br>occ | sf_11 | 242   | Desulfosporosinus orientis str. DSMZ 7493             | -0.573 | 0.032 | 0.035 |
| Firmicutes     | Streptococcaceae            | sf_1  | 3907  | aortic heart valve patient with endocarditis clone v6 | -0.573 | 0.032 | 0.035 |
| Firmicutes     | Peptococc/Acidaminoc<br>occ | sf_11 | 710   | Centipeda periodontii str. HB-2                       | -0.573 | 0.032 | 0.035 |
| Cyanobacteria  | Chloroplasts                | sf_5  | 5183  | Pisum sativum -- chloroplast                          | -0.576 | 0.031 | 0.035 |
| Cyanobacteria  | Chloroplasts                | sf_5  | 5192  | Cycas revoluta                                        | -0.576 | 0.031 | 0.035 |
| Firmicutes     | Lachnospiraceae             | sf_5  | 2991  | rumen clone 3C3d-8                                    | -0.576 | 0.031 | 0.035 |
| Firmicutes     | Enterococcaceae             | sf_1  | 3881  | Enterococcus dispar str. LMG 13521                    | -0.576 | 0.031 | 0.035 |
| Bacteroidetes  | Flavobacteriaceae           | sf_1  | 5836  | Capnocytophaga granulosa str. LMG 12119; FDC SD4      | -0.577 | 0.031 | 0.035 |
| Firmicutes     | Peptococc/Acidaminoc<br>occ | sf_11 | 300   | benzene-contaminated groundwater clone ZZ12C8         | -0.579 | 0.030 | 0.035 |
| Bacteroidetes  | Unclassified                | sf_15 | 5784  | fruiting body Pleurotus eryngii clone PE01            | -0.579 | 0.030 | 0.035 |
| Firmicutes     | Bacillaceae                 | sf_1  | 3848  | Bacillus sp. str. TUT1007                             | -0.579 | 0.030 | 0.035 |
| Firmicutes     | Carnobacteriaceae           | sf_1  | 3792  | Carnobacterium sp. str. D35                           | -0.580 | 0.030 | 0.035 |

|                |                    |        |      |                                                   |        |       |       |
|----------------|--------------------|--------|------|---------------------------------------------------|--------|-------|-------|
| Firmicutes     | Lachnospiraceae    | sf_5   | 4533 | termite gut homogenate clone Rs-N06 bacterium     | -0.581 | 0.029 | 0.035 |
| Unclassified   | Unclassified       | sf_160 | 651  |                                                   | -0.581 | 0.029 | 0.035 |
| Bacteroidetes  | Flavobacteriaceae  | sf_1   | 6246 | crevicular epithelial cells clone BU084           | -0.581 | 0.029 | 0.035 |
| Firmicutes     | Lachnospiraceae    | sf_5   | 4434 | termite gut homogenate clone Rs-K11 bacterium     | -0.581 | 0.029 | 0.035 |
| Firmicutes     | Lactobacillaceae   | sf_1   | 3418 | Lactobacillus subsp. aviarius                     | -0.581 | 0.029 | 0.035 |
| Firmicutes     | Clostridiaceae     | sf_12  | 4297 |                                                   | -0.582 | 0.029 | 0.035 |
| Proteobacteria | Polyangiaceae      | sf_3   | 9671 | hydrothermal sediment clone AF420357              | -0.582 | 0.029 | 0.035 |
| Firmicutes     | Acholeplasmataceae | sf_1   | 3976 |                                                   | -0.583 | 0.029 | 0.035 |
| Firmicutes     | Acholeplasmataceae | sf_1   | 3961 | Clover yellow edge mycoplasma-like organism       | -0.583 | 0.028 | 0.035 |
| Bacteroidetes  | Flavobacteriaceae  | sf_1   | 5301 |                                                   | -0.584 | 0.028 | 0.035 |
| Firmicutes     | Streptococcaceae   | sf_1   | 3685 | Streptococcus gordonii str. ATCC 10558            | -0.584 | 0.028 | 0.035 |
| Actinobacteria | Micrococcaceae     | sf_1   | 2063 | Rothia dentocariosa str. ATCC 17931               | -0.585 | 0.028 | 0.035 |
| Firmicutes     | Clostridiaceae     | sf_12  | 4272 | termite gut homogenate clone Rs-M34 bacterium     | -0.586 | 0.028 | 0.035 |
| Synergistes    | Unclassified       | sf_3   | 353  | UASB reactor granular sludge clone PD-UASB-13 G+C | -0.586 | 0.028 | 0.035 |
| Fusobacteria   | Fusobacteriaceae   | sf_3   | 721  | human mouth clone P2PB_51                         | -0.586 | 0.028 | 0.035 |
| Firmicutes     | Clostridiaceae     | sf_12  | 4524 | termite gut clone Rs-093                          | -0.587 | 0.027 | 0.035 |
| Firmicutes     | Acholeplasmataceae | sf_1   | 4045 | Chinaberry yellows phytoplasma                    | -0.587 | 0.027 | 0.035 |
| Firmicutes     | Lachnospiraceae    | sf_5   | 4155 | termite gut homogenate clone Rs-K92 bacterium     | -0.588 | 0.027 | 0.035 |
| Firmicutes     | Lactobacillaceae   | sf_1   | 3703 | Lactobacillus salivarius str. RA2115              | -0.590 | 0.026 | 0.035 |
| Firmicutes     | Clostridiaceae     | sf_12  | 4622 | termite gut clone Rs-L36                          | -0.591 | 0.026 | 0.035 |
| Firmicutes     | Aerococcaceae      | sf_1   | 3833 | Carnobacterium alterfunditum                      | -0.591 | 0.026 | 0.035 |

|                |                         |       |      |                                                                       |        |       |       |
|----------------|-------------------------|-------|------|-----------------------------------------------------------------------|--------|-------|-------|
| Firmicutes     | Lachnospiraceae         | sf_5  | 4540 | termite gut homogenate clone Rs-M18 bacterium                         | -0.592 | 0.026 | 0.035 |
| Firmicutes     | Streptococcaceae        | sf_1  | 3251 | Streptococcus cristatus str. ATCC 51100                               | -0.592 | 0.026 | 0.035 |
| TM7            | Unclassified            | sf_1  | 2697 | midgut homogenate Pachnoda ephippiata larva clone PeM47               | -0.592 | 0.026 | 0.035 |
| Chloroflexi    | Unclassified            | sf_1  | 258  | DCP-dechlorinating consortium clone SHD-14                            | -0.593 | 0.026 | 0.035 |
| Firmicutes     | Aerococcaceae           | sf_1  | 3840 | Trichococcus pasteurii str. KoTa2                                     | -0.593 | 0.026 | 0.035 |
| Proteobacteria | Neisseriaceae           | sf_1  | 8143 | subgingival dental plaque clone AK105                                 | -0.594 | 0.025 | 0.035 |
| Firmicutes     | Acholeplasmataceae      | sf_1  | 3975 | Black raspberry witches'-broom phytoplasma str. BRWB witches'-broom   | -0.594 | 0.025 | 0.035 |
| Firmicutes     | Streptococcaceae        | sf_1  | 3543 |                                                                       | -0.598 | 0.024 | 0.035 |
| Chloroflexi    | Unclassified            | sf_1  | 2339 | uranium mill tailings soil sample clone Sh765B-TzT-20 bacterium       | -0.602 | 0.023 | 0.035 |
| Firmicutes     | Unclassified            | sf_1  | 3289 | Isobaculum melis CCUG 37660T                                          | -0.602 | 0.023 | 0.035 |
| Firmicutes     | Clostridiaceae          | sf_12 | 4475 | termite gut homogenate clone Rs-N02 bacterium                         | -0.604 | 0.022 | 0.035 |
| Firmicutes     | Enterococcaceae         | sf_1  | 3598 | Enterococcus solitarius str. DSM 5634                                 | -0.607 | 0.021 | 0.035 |
| Firmicutes     | Clostridiaceae          | sf_12 | 4310 | termite gut clone Rs-056                                              | -0.607 | 0.021 | 0.035 |
| Firmicutes     | Enterococcaceae         | sf_1  | 3680 | Melissococcus plutonius str. NCDO 2440                                | -0.610 | 0.021 | 0.035 |
| Firmicutes     | Peptococc/acidaminococc | sf_11 | 150  |                                                                       | -0.617 | 0.019 | 0.035 |
| Chlorobi       | Unclassified            | sf_8  | 549  | benzene-degrading nitrate-reducing consortium clone Cart-N2 bacterium | -0.618 | 0.018 | 0.035 |
| Firmicutes     | Lactobacillaceae        | sf_1  | 3526 | Lactobacillus sakei                                                   | -0.620 | 0.018 | 0.035 |
| Firmicutes     | Lachnospiraceae         | sf_5  | 4281 | granular sludge clone UASB_brew_B86                                   | -0.627 | 0.016 | 0.035 |
| Bacteroidetes  | Flavobacteriaceae       | sf_1  | 5726 | Bergeyella sp. oral AK152 clone                                       | -0.628 | 0.016 | 0.035 |
| Firmicutes     | Lachnospiraceae         | sf_5  | 4512 | granular sludge clone UASB_brew_B25                                   | -0.632 | 0.015 | 0.035 |
| Firmicutes     | Lachnospiraceae         | sf_5  | 4331 | granular sludge clone UASB_brew_B84                                   | -0.638 | 0.014 | 0.035 |

**Table S6. Kolmogorov-Smirnov assessment of data distribution.**

| <b>OTU ID</b>                | <b>635</b> | <b>5769</b> | <b>5822</b> | <b>5130</b> | <b>6732</b> | <b>7878</b> | <b>612</b> | <b>1233</b> | <b>1711</b> | <b>2497</b> |
|------------------------------|------------|-------------|-------------|-------------|-------------|-------------|------------|-------------|-------------|-------------|
|                              | 534        | 215         | 2620        | 115         | 516         | 686         | 732        | 974         | 1144        | 1716        |
|                              | 657        | 185         | 1586        | 330         | 1086        | 2441        | 1341       | 1246        | 1337        | 2145        |
|                              | 401        | 1064        | 1138        | 455         | 869         | 2279        | 1641       | 716         | 1012        | 1987        |
|                              | 419        | 2895        | 3411        | 1069        | 1515        | 3589        | 2784       | 1760        | 1796        | 4049        |
|                              | 497        | 2259        | 2801        | 848         | 1395        | 1915        | 2238       | 1574        | 1787        | 3146        |
| <b>FI<sup>a</sup> values</b> | 410        | 3143        | 2782        | 1086        | 1658        | 2841        | 2615       | 1653        | 1527        | 3759        |
|                              | 770        | 3958        | 4192        | 1464        | 2616        | 3551        | 3571       | 2737        | 2615        | 4639        |
|                              | 395        | 3051        | 2900        | 1106        | 2016        | 2516        | 2778       | 1796        | 1450        | 3543        |
|                              | 808        | 4146        | 3324        | 1493        | 2424        | 3436        | 3230       | 2512        | 2209        | 4312        |
|                              | 184        | 2515        | 2263        | 878         | 1356        | 2314        | 2422       | 1198        | 1229        | 2930        |
|                              | 274        | 4026        | 3125        | 1436        | 1971        | 3341        | 3104       | 2014        | 1848        | 4325        |
|                              | 547        | 4478        | 4388        | 2519        | 2629        | 4122        | 4171       | 2915        | 2594        | 5002        |
|                              | 416        | 3913        | 3514        | 1687        | 2230        | 3648        | 3274       | 2305        | 1900        | 4748        |
|                              | 456        | 3985        | 3372        | 1685        | 2057        | 3579        | 3203       | 2055        | 2005        | 4416        |
| <b>p statistic</b>           | p = 0.7    | p=0.72      | p=0.74      | p=0.71      | p=0.95      | p=0.68      | p=0.84     | p=0.74      | p=0.89      | p=0.87      |
| <b>Mean</b>                  | 492.8      | 2736        | 2931        | 1182        | 1711        | 2821        | 2609       | 1822        | 1769        | 3560        |
| <b>Standard deviation</b>    | 205.2      | 1758        | 1113        | 753.6       | 762.1       | 1209        | 1155       | 751.7       | 562.6       | 1263        |

<sup>a</sup>Fluorescence intensity values reported for each sample
